# Supplementary material for: Analysis of the transcription factors and their regulatory roles during a step-by-step differentiation of induced pluripotent stem cells into hepatocyte-like cells
Source: Royal Society of Chemistry journal article supplement (doi:10.1039/c9mo00122k), 2019-10-15
Supplement: c9mo00122k2.xlsx [file c9mo00122k2.xlsx]

## Sheet: STRING_iPSC
#cluster name	cluster color	gene count	protein name	protein identifier	protein description
Cluster_1	Cyan	88	ZFP42	9606.ENSP00000317686	Zinc finger protein 42 homolog (mouse); Involved in the reprogramming of X-chromosome inactivation during the acquisition of pluripotency. Required for efficient elongation of TSIX, a non-coding RNA antisense to XIST. Binds DXPas34 enhancer within the TSIX promoter. Involved in ES cell self-renewal (By similarity)
Cluster_1	Cyan	88	CSMD2	9606.ENSP00000241312	CUB and Sushi multiple domains 2
Cluster_1	Cyan	88	PHF17	9606.ENSP00000226319	PHD finger protein 17; Component of the HBO1 complex which has a histone H4- specific acetyltransferase activity, a reduced activity toward histone H3 and is responsible for the bulk of histone H4 acetylation in vivo. Transcriptional coactivator, it may also promote acetylation of nucleosomal histone H4 by KAT5. Promotes apoptosis. May act as a renal tumor suppressor
Cluster_1	Cyan	88	C4orf21	9606.ENSP00000424737	Chromosome 4 open reading frame 21
Cluster_1	Cyan	88	XK	9606.ENSP00000367879	X-linked Kx blood group (McLeod syndrome); May be involved in sodium-dependent transport of neutral amino acids or oligopeptides
Cluster_1	Cyan	88	HRASLS5	9606.ENSP00000301790	HRAS-like suppressor family, member 5; Catalyzes N-acylation of phosphatidylethanolamine (PE) to generate N-Acylphosphatidylethanolamine (NAPE) a precursor of bioactive N-acylethanolamines, including the endocannabinoid anandamide
Cluster_1	Cyan	88	ZNF850	9606.ENSP00000464976	Zinc finger protein 850; May be involved in transcriptional regulation
Cluster_1	Cyan	88	PRPS1	9606.ENSP00000361512	Phosphoribosyl pyrophosphate synthetase 1; Catalyzes the synthesis of phosphoribosylpyrophosphate (PRPP) that is essential for nucleotide synthesis
Cluster_1	Cyan	88	ALDH1B1	9606.ENSP00000366927	Aldehyde dehydrogenase 1 family, member B1; ALDHs play a major role in the detoxification of alcohol-derived acetaldehyde. They are involved in the metabolism of corticosteroids, biogenic amines, neurotransmitters, and lipid peroxidation
Cluster_1	Cyan	88	CBR1	9606.ENSP00000290349	Carbonyl reductase 1; NADPH-dependent reductase with broad substrate specificity. Catalyzes the reduction of a wide variety of carbonyl compounds including quinones, prostaglandins, menadione, plus various xenobiotics. Catalyzes the reduction of the antitumor anthracyclines doxorubicin and daunorubicin to the cardiotoxic compounds doxorubicinol and daunorubicinol. Can convert prostaglandin E2 to …
Cluster_1	Cyan	88	JAKMIP2	9606.ENSP00000265272	Janus kinase and microtubule interacting protein 2
Cluster_1	Cyan	88	SLC7A3	9606.ENSP00000298085	Solute carrier family 7 (cationic amino acid transporter, y+ system), member 3; Mediates the uptake of the cationic amino acids arginine, lysine and ornithine in a sodium-independent manner
Cluster_1	Cyan	88	NEB	9606.ENSP00000380505	Nebulin
Cluster_1	Cyan	88	STK33	9606.ENSP00000320754	Serine/threonine kinase 33; Serine/threonine protein kinase which phosphorylates VIME. May play a specific role in the dynamic behavior of the intermediate filament cytoskeleton by phosphorylation of VIME (By similarity). Not essential for the survival of KRAS-dependent AML cell lines
Cluster_1	Cyan	88	G3BP1	9606.ENSP00000348578	GTPase activating protein (SH3 domain) binding protein 1; May be a regulated effector of stress granule assembly. Phosphorylation-dependent sequence-specific endoribonuclease in vitro. Cleaves exclusively between cytosine and adenine and cleaves MYC mRNA preferentially at the 3'-UTR. ATP- and magnesium- dependent helicase. Unwinds preferentially partial DNA and RNA duplexes having a 17 bp anneale…
Cluster_1	Cyan	88	TXLNG	9606.ENSP00000369465	Taxilin gamma; May be involved in intracellular vesicle traffic. Inhibits ATF4-mediated transcription, possibly by dimerizing with ATF4 to form inactive dimers that cannot bind DNA. May be involved in regulating bone mass density through an ATF4-dependent pathway. May be involved in cell cycle progression
Cluster_1	Cyan	88	MT-ATP8	9606.ENSP00000355265	Mitochondrially encoded ATP synthase 8; Mitochondrial membrane ATP synthase (F(1)F(0) ATP synthase or Complex V) produces ATP from ADP in the presence of a proton gradient across the membrane which is generated by electron transport complexes of the respiratory chain. F-type ATPases consist of two structural domains, F(1) - containing the extramembraneous catalytic core and F(0) - containing the …
Cluster_1	Cyan	88	PTPRS	9606.ENSP00000349932	Protein tyrosine phosphatase, receptor type, S; Interacts with LAR-interacting protein LIP.1
Cluster_1	Cyan	88	GJC1	9606.ENSP00000333193	Gap junction protein, gamma 1, 45kDa; One gap junction consists of a cluster of closely packed pairs of transmembrane channels, the connexons, through which materials of low MW diffuse from one cell to a neighboring cell
Cluster_1	Cyan	88	BCOR	9606.ENSP00000367705	BCL6 corepressor; Transcriptional corepressor. May specifically inhibit gene expression when recruited to promoter regions by sequence- specific DNA-binding proteins such as BCL6 and MLLT3. This repression may be mediated at least in part by histone deacetylase activities which can associate with this corepressor. Involved in the repression of TFAP2A; impairs binding of BCL6 and KDM2B to TFAP2A p…
Cluster_1	Cyan	88	FAM111B	9606.ENSP00000341565	Family with sequence similarity 111, member B
Cluster_1	Cyan	88	LRFN5	9606.ENSP00000298119	Leucine rich repeat and fibronectin type III domain containing 5; Cell adhesion molecule that mediates homophilic cell- cell adhesion in a Ca(2+)-independent manner. Promotes neurite outgrowth in hippocampal neurons
Cluster_1	Cyan	88	HNRNPA3	9606.ENSP00000376309	Heterogeneous nuclear ribonucleoprotein A3; Plays a role in cytoplasmic trafficking of RNA. Binds to the cis-acting response element, A2RE. May be involved in pre-mRNA splicing
Cluster_1	Cyan	88	NEK3	9606.ENSP00000383210	NIMA-related kinase 3; Protein kinase which influences neuronal morphogenesis and polarity through effects on microtubules. Regulates microtubule acetylation in neurons. Contributes to prolactin- mediated phosphorylation of PXN and VAV2. Implicated in prolactin- mediated cytoskeletal reorganization and motility of breast cancer cells through mechanisms involving RAC1 activation and phosphorylatio…
Cluster_1	Cyan	88	SNTG2	9606.ENSP00000311837	Syntrophin, gamma 2; Adapter protein that binds to and probably organizes the subcellular localization of a variety of proteins. May link various receptors to the actin cytoskeleton and the dystrophin glycoprotein complex (By similarity)
Cluster_1	Cyan	88	ZNF398	9606.ENSP00000420418	Zinc finger protein 398; Function as a transcriptional activator
Cluster_1	Cyan	88	GRIA1	9606.ENSP00000285900	Glutamate receptor, ionotropic, AMPA 1; Ionotropic glutamate receptor. L-glutamate acts as an excitatory neurotransmitter at many synapses in the central nervous system. Binding of the excitatory neurotransmitter L- glutamate induces a conformation change, leading to the opening of the cation channel, and thereby converts the chemical signal to an electrical impulse. The receptor then desensitize…
Cluster_1	Cyan	88	FAM155A	9606.ENSP00000365080	Family with sequence similarity 155, member A
Cluster_1	Cyan	88	HMGN5	9606.ENSP00000350848	High mobility group nucleosome binding domain 5; Preferentially binds to euchromatin and modulates cellular transcription by counteracting linker histone-mediated chromatin compaction
Cluster_1	Cyan	88	AP1S2	9606.ENSP00000328789	Adaptor-related protein complex 1, sigma 2 subunit; Subunit of clathrin-associated adaptor protein complex 1 that plays a role in protein sorting in the late-Golgi/trans-Golgi network (TGN) and/or endosomes. The AP complexes mediate both the recruitment of clathrin to membranes and the recognition of sorting signals within the cytosolic tails of transmembrane cargo molecules
Cluster_1	Cyan	88	CDCA7L	9606.ENSP00000383986	Cell division cycle associated 7-like; Plays a role in transcriptional regulation as a repressor that inhibits monoamine oxidase A (MAOA) activity and gene expression by binding to the promoter. Plays an important oncogenic role in mediating the full transforming effect of MYC in medulloblastoma cells. Involved in apoptotic signaling pathways; May act downstream of P38-kinase and BCL-2, but upstr…
Cluster_1	Cyan	88	CADPS2	9606.ENSP00000398481	Ca++-dependent secretion activator 2; Calcium-binding protein involved in exocytosis of vesicles filled with neurotransmitters and neuropeptides. Probably acts upstream of fusion in the biogenesis or maintenance of mature secretory vesicles. Regulates neurotrophin release from granule cells leading to regulate cell differentiation and survival during cerebellar development. May specifically media…
Cluster_1	Cyan	88	VSNL1	9606.ENSP00000295156	Visinin-like 1; Regulates (in vitro) the inhibition of rhodopsin phosphorylation in a calcium-dependent manner
Cluster_1	Cyan	88	ZNF208	9606.ENSP00000380315	Zinc finger protein 208; May be involved in transcriptional regulation
Cluster_1	Cyan	88	RUVBL1	9606.ENSP00000318297	RuvB-like 1 (E. coli); May be able to bind plasminogen at cell surface and enhance plasminogen activation
Cluster_1	Cyan	88	VMA21	9606.ENSP00000333255	VMA21 vacuolar H+-ATPase homolog (S. cerevisiae); Required for the assembly of the V0 complex of the vacuolar ATPase (V-ATPase) in the endoplasmic reticulum
Cluster_1	Cyan	88	SPP1	9606.ENSP00000378517	Secreted phosphoprotein 1; Binds tightly to hydroxyapatite. Appears to form an integral part of the mineralized matrix. Probably important to cell-matrix interaction
Cluster_1	Cyan	88	PIPOX	9606.ENSP00000317721	Pipecolic acid oxidase; Metabolizes sarcosine, L-pipecolic acid and L-proline
Cluster_1	Cyan	88	PDE7A	9606.ENSP00000385632	Phosphodiesterase 7A; Hydrolyzes the second messenger cAMP, which is a key regulator of many important physiological processes. May have a role in muscle signal transduction
Cluster_1	Cyan	88	TRIM2	9606.ENSP00000339659	Tripartite motif containing 2; UBE2D1-dependent E3 ubiquitin-protein ligase that mediates the ubiquitination of NEFL and of phosphorylated BCL2L11. Plays a neuroprotective function. May play a role in neuronal rapid ischemic tolerance
Cluster_1	Cyan	88	OPCML	9606.ENSP00000330862	Opioid binding protein/cell adhesion molecule-like; Binds opioids in the presence of acidic lipids; probably involved in cell contact
Cluster_1	Cyan	88	FAM169A	9606.ENSP00000373808	Family with sequence similarity 169, member A
Cluster_1	Cyan	88	ETV5	9606.ENSP00000306894	Ets variant 5; Binds to DNA sequences containing the consensus nucleotide core sequence 5'-GGAA.-3'
Cluster_1	Cyan	88	SLC38A1	9606.ENSP00000381634	Solute carrier family 38, member 1; Functions as a sodium-dependent amino acid transporter. Mediates the saturable, pH-sensitive and electrogenic cotransport of glutamine and sodium ions with a stoichiometry of 1:1. May also transport small zwitterionic and aliphatic amino acids with a lower affinity. May supply glutamatergic and GABAergic neurons with glutamine which is required for the synthesi…
Cluster_1	Cyan	88	ELAVL2	9606.ENSP00000369460	ELAV (embryonic lethal, abnormal vision, Drosophila)-like 2 (Hu antigen B); Binds RNA. Seems to recognize a GAAA motif. Can bind to its own 3'-UTR, the FOS 3'-UTR and the ID 3'-UTR
Cluster_1	Cyan	88	SNRPF	9606.ENSP00000266735	Small nuclear ribonucleoprotein polypeptide F; Core component of the spliceosomal U1, U2, U4 and U5 small nuclear ribonucleoproteins (snRNPs), the building blocks of the spliceosome. Thereby, plays an important role in the splicing of cellular pre-mRNAs. Most spliceosomal snRNPs contain a common set of Sm proteins SNRPB, SNRPD1, SNRPD2, SNRPD3, SNRPE, SNRPF and SNRPG that assemble in a heptameric…
Cluster_1	Cyan	88	NRXN1	9606.ENSP00000385142	Neurexin 1; Cell surface protein involved in cell-cell-interactions, exocytosis of secretory granules and regulation of signal transmission. Function is isoform-specific. Alpha-type isoforms have a long N-terminus with six laminin G-like domains and play an important role in synaptic signal transmission. Alpha-type isoforms play a role in the regulation of calcium channel activity and Ca(2+)-trig…
Cluster_1	Cyan	88	HECW1	9606.ENSP00000379228	HECT, C2 and WW domain containing E3 ubiquitin protein ligase 1; E3 ubiquitin-protein ligase that mediates ubiquitination and subsequent degradation of DVL1. Also targets the mutant SOD1 protein involved in familial amyotrophic lateral sclerosis (FALS). Forms cytotoxic aggregates with DVL1, SSR3 and mutant SOD1 that lead to motor neuron death in FALS
Cluster_1	Cyan	88	NRG3	9606.ENSP00000361214	Neuregulin 3; Direct ligand for the ERBB4 tyrosine kinase receptor. Binding results in ligand-stimulated tyrosine phosphorylation and activation of the receptor. Does not bind to the EGF receptor, ERBB2 or ERBB3 receptors. May be a survival factor for oligodendrocytes
Cluster_1	Cyan	88	ZNF195	9606.ENSP00000382511	Zinc finger protein 195; May be involved in transcriptional regulation
Cluster_1	Cyan	88	ZNF107	9606.ENSP00000343443	Zinc finger protein 107; May be involved in transcriptional regulation
Cluster_1	Cyan	88	NSD1	9606.ENSP00000395929	Nuclear receptor binding SET domain protein 1; Histone methyltransferase. Preferentially methylates 'Lys-36' of histone H3 and 'Lys-20' of histone H4 (in vitro). Transcriptional intermediary factor capable of both negatively or positively influencing transcription, depending on the cellular context
Cluster_1	Cyan	88	JARID2	9606.ENSP00000341280	Jumonji, AT rich interactive domain 2; Regulator of histone methyltransferase complexes that plays an essential role in embryonic development, including heart and liver development, neural tube fusion process and hematopoiesis. Acts by modulating histone methyltransferase activity and promoting the recruitment of histone methyltransferase complexes to their target genes. Binds DNA and mediates th…
Cluster_1	Cyan	88	PHF21B	9606.ENSP00000324403	PHD finger protein 21B
Cluster_1	Cyan	88	SLC29A1	9606.ENSP00000360773	Solute carrier family 29 (nucleoside transporters), member 1; Mediates both influx and efflux of nucleosides across the membrane (equilibrative transporter). It is sensitive (ES) to low concentrations of the inhibitor nitrobenzylmercaptopurine riboside (NBMPR) and is sodium-independent. It has a higher affinity for adenosine. Inhibited by dipyridamole and dilazep (anticancer chemotherapeutics dru…
Cluster_1	Cyan	88	THY1	9606.ENSP00000284240	Thy-1 cell surface antigen; May play a role in cell-cell or cell-ligand interactions during synaptogenesis and other events in the brain
Cluster_1	Cyan	88	KCNT2	9606.ENSP00000294725	Potassium channel, subfamily T, member 2; Outward rectifying potassium channel. Produces rapidly activating outward rectifier K(+) currents. Activated by high intracellular sodium and chloride levels. Channel activity is inhibited by ATP and by inhalation anesthetics, such as isoflurane (By similarity). Inhibited upon stimulation of G-protein coupled receptors, such as CHRM1 and GRIA1
Cluster_1	Cyan	88	PRKX	9606.ENSP00000262848	Protein kinase, X-linked; Serine/threonine protein kinase regulated by and mediating cAMP signaling in cells. Acts through phosphorylation of downstream targets that may include CREB, SMAD6 and PKD1 and has multiple functions in cellular differentiation and epithelial morphogenesis. Regulates myeloid cell differentiation through SMAD6 phosphorylation. Involved in nephrogenesis by stimulating rena…
Cluster_1	Cyan	88	ARMC6	9606.ENSP00000376148	Armadillo repeat containing 6
Cluster_1	Cyan	88	ERC2	9606.ENSP00000288221	ELKS/RAB6-interacting/CAST family member 2; Thought to be involved in the organization of the cytomatrix at the nerve terminals active zone (CAZ) which regulates neurotransmitter release. Seems to act together with BSN. May recruit liprin-alpha proteins to the CAZ
Cluster_1	Cyan	88	SRSF3	9606.ENSP00000362820	Serine/arginine-rich splicing factor 3; Splicing factor that specifically promotes exon- inclusion during alternative splicing (PubMed:26876937). Interaction with YTHDC1, a RNA-binding protein that recognizes and binds N6-methyladenosine (m6A)-containing RNAs, promotes recruitment of SRSF3 to its mRNA-binding elements adjacent to m6A sites, leading to exon-inclusion during alternative splicing (P…
Cluster_1	Cyan	88	HAUS6	9606.ENSP00000369871	HAUS augmin-like complex, subunit 6; Contributes to mitotic spindle assembly, maintenance of centrosome integrity and completion of cytokinesis as part of the HAUS augmin-like complex. Promotes the nucleation of microtubules from the spindle through recruitment of NEDD1 and gamma-tubulin
Cluster_1	Cyan	88	CADM2	9606.ENSP00000384193	Cell adhesion molecule 2; Adhesion molecule that engages in homo- and heterophilic interactions with the other nectin-like family members, leading to cell aggregation. Important for synapse organization, providing regulated trans-synaptic adhesion. Preferentially binds to oligodendrocytes
Cluster_1	Cyan	88	LRIG1	9606.ENSP00000273261	Leucine-rich repeats and immunoglobulin-like domains 1; Acts as a feedback negative regulator of signaling by receptor tyrosine kinases, through a mechanism that involves enhancement of receptor ubiquitination and accelerated intracellular degradation
Cluster_1	Cyan	88	DCTN1	9606.ENSP00000354791	Dynactin 1; Required for the cytoplasmic dynein-driven retrograde movement of vesicles and organelles along microtubules. Dynein- dynactin interaction is a key component of the mechanism of axonal transport of vesicles and organelles
Cluster_1	Cyan	88	TTC39C	9606.ENSP00000323645	Tetratricopeptide repeat domain 39C
Cluster_1	Cyan	88	ZNF770	9606.ENSP00000348673	Zinc finger protein 770; May be involved in transcriptional regulation
Cluster_1	Cyan	88	MMS22L	9606.ENSP00000275053	MMS22-like, DNA repair protein; Component of the MMS22L-TONSL complex, a complex that stimulates the recombination-dependent repair of stalled or collapsed replication forks. The MMS22L-TONSL complex is required to maintain genome integrity during DNA replication by promoting homologous recombination-mediated repair of replication fork- associated double-strand breaks. It may act by mediating the…
Cluster_1	Cyan	88	ZNF891	9606.ENSP00000380480	Zinc finger protein 891; May be involved in transcriptional regulation
Cluster_1	Cyan	88	CD3EAP	9606.ENSP00000310966	CD3e molecule, epsilon associated protein; DNA-dependent RNA polymerase catalyzes the transcription of DNA into RNA using the four ribonucleoside triphosphates as substrates. Component of RNA polymerase I which synthesizes ribosomal RNA precursors. Isoform 1 is involved in UBTF-activated transcription, presumably at a step following PIC formation
Cluster_1	Cyan	88	EMB	9606.ENSP00000302289	Embigin; Plays a role in the outgrowth of motoneurons and in the formation of neuromuscular junctions. Following muscle denervation, promotes nerve terminal sprouting and the formation of additional acetylcholine receptor clusters at synaptic sites without affecting terminal Schwann cell number or morphology. Delays the retraction of terminal sprouts following re-innervation of denervated endplat…
Cluster_1	Cyan	88	PIR	9606.ENSP00000369785	Pirin (iron-binding nuclear protein); Transcriptional coregulator of NF-kappa-B which facilitates binding of NF-kappa-B proteins to target kappa-B genes in a redox-state-dependent manner. May be required for efficient terminal myeloid maturation of hematopoietic cells. Has quercetin 2,3-dioxygenase activity (in vitro)
Cluster_1	Cyan	88	ZNF589	9606.ENSP00000346729	Zinc finger protein 589; May play a role in hematopoietic stem/progenitor cell differentiation. May play a role as a DNA binding-dependent transcriptional repressor
Cluster_1	Cyan	88	CTSC	9606.ENSP00000227266	Cathepsin C; Thiol protease. Has dipeptidylpeptidase activity. Active against a broad range of dipeptide substrates composed of both polar and hydrophobic amino acids. Proline cannot occupy the P1 position and arginine cannot occupy the P2 position of the substrate. Can act as both an exopeptidase and endopeptidase. Activates serine proteases such as elastase, cathepsin G and granzymes A and B. C…
Cluster_1	Cyan	88	TMEM132D	9606.ENSP00000408581	Transmembrane protein 132D; May serve as a cell-surface marker for oligodendrocyte differentiation
Cluster_1	Cyan	88	SLC24A2	9606.ENSP00000344801	Solute carrier family 24 (sodium/potassium/calcium exchanger), member 2; Critical component of the visual transduction cascade, controlling the calcium concentration of outer segments during light and darkness. Light causes a rapid lowering of cytosolic free calcium in the outer segment of both retinal rod and cone photoreceptors and the light-induced lowering of calcium is caused by extrusion vi…
Cluster_1	Cyan	88	NELL2	9606.ENSP00000416341	NEL-like 2 (chicken); Required for neuron survival through the modulation of MAPK pathways (By similarity). Involved in the regulation of hypothalamic GNRH secretion and the control of puberty (By similarity)
Cluster_1	Cyan	88	SALL2	9606.ENSP00000333537	Sal-like 2 (Drosophila); Probable transcription factor that plays a role in eye development before, during, and after optic fissure closure
Cluster_1	Cyan	88	ZNF121	9606.ENSP00000326967	Zinc finger protein 121; May be involved in transcriptional regulation
Cluster_1	Cyan	88	SNRPD1	9606.ENSP00000300413	Small nuclear ribonucleoprotein D1 polypeptide 16kDa; Core component of the spliceosomal U1, U2, U4 and U5 small nuclear ribonucleoproteins (snRNPs), the building blocks of the spliceosome. Thereby, plays an important role in the splicing of cellular pre-mRNAs. Most spliceosomal snRNPs contain a common set of Sm proteins SNRPB, SNRPD1, SNRPD2, SNRPD3, SNRPE, SNRPF and SNRPG that assemble in a hep…
Cluster_1	Cyan	88	GDAP1	9606.ENSP00000220822	Ganglioside induced differentiation associated protein 1; Regulates the mitochondrial network by promoting mitochondrial fission
Cluster_1	Cyan	88	GALNT13	9606.ENSP00000376570	UDP-N-acetyl-alpha-D-galactosamine:polypeptide N-acetylgalactosaminyltransferase 13 (GalNAc-T13); Catalyzes the initial reaction in O-linked oligosaccharide biosynthesis, the transfer of an N-acetyl-D- galactosamine residue to a serine or threonine residue on the protein receptor. Has a much stronger activity than GALNT1 to transfer GalNAc to mucin peptides, such as Muc5Ac and Muc7. Able to glyco…
Cluster_1	Cyan	88	ZNF90	9606.ENSP00000410466	Zinc finger protein 90; May be involved in transcriptional regulation
Cluster_1	Cyan	88	GPATCH4	9606.ENSP00000396441	G patch domain containing 4
Cluster_1	Cyan	88	SBK1	9606.ENSP00000343248	SH3-binding domain kinase 1; May be involved in signal-transduction pathways related to the control of brain development
Cluster_1	Cyan	88	KIF1A	9606.ENSP00000322791	Kinesin family member 1A; Motor for anterograde axonal transport of synaptic vesicle precursors
Cluster_1	Cyan	88	CEP152	9606.ENSP00000382271	Centrosomal protein 152kDa; Necessary for centrosome duplication; the function seems also to involve CEP63, CDK5RAP2 and WDR62 through a stepwise assembled complex at the centrosome that recruits CDK2 required for centriole duplication (PubMed:26297806). Acts as a molecular scaffold facilitating the interaction of PLK4 and CENPJ, 2 molecules involved in centriole formation (PubMed:21059844, PubMe…
Cluster_1	Cyan	88	GEMIN5	9606.ENSP00000285873	Gem (nuclear organelle) associated protein 5; The SMN complex plays a catalyst role in the assembly of small nuclear ribonucleoproteins (snRNPs), the building blocks of the spliceosome. Thereby, plays an important role in the splicing of cellular pre-mRNAs. Most spliceosomal snRNPs contain a common set of Sm proteins SNRPB, SNRPD1, SNRPD2, SNRPD3, SNRPE, SNRPF and SNRPG that assemble in a heptame…
Cluster_2	Red	23	PCNA	9606.ENSP00000368438	Proliferating cell nuclear antigen; Auxiliary protein of DNA polymerase delta and is involved in the control of eukaryotic DNA replication by increasing the polymerase's processibility during elongation of the leading strand. Induces a robust stimulatory effect on the 3'- 5' exonuclease and 3'-phosphodiesterase, but not apurinic- apyrimidinic (AP) endonuclease, APEX2 activities. Has to be loaded …
Cluster_2	Red	23	NASP	9606.ENSP00000255120	Nuclear autoantigenic sperm protein (histone-binding); Required for DNA replication, normal cell cycle progression and cell proliferation. Forms a cytoplasmic complex with HSP90 and H1 linker histones and stimulates HSP90 ATPase activity. NASP and H1 histone are subsequently released from the complex and translocate to the nucleus where the histone is released for binding to DNA (By similarity)
Cluster_2	Red	23	RFC4	9606.ENSP00000296273	Replication factor C (activator 1) 4, 37kDa; The elongation of primed DNA templates by DNA polymerase delta and epsilon requires the action of the accessory proteins proliferating cell nuclear antigen (PCNA) and activator 1. This subunit may be involved in the elongation of the multiprimed DNA template
Cluster_2	Red	23	RRM2	9606.ENSP00000353770	Ribonucleotide reductase M2; Provides the precursors necessary for DNA synthesis. Catalyzes the biosynthesis of deoxyribonucleotides from the corresponding ribonucleotides. Inhibits Wnt signaling
Cluster_2	Red	23	SET	9606.ENSP00000361777	SET nuclear oncogene; Multitasking protein, involved in apoptosis, transcription, nucleosome assembly and histone chaperoning. Isoform 2 anti-apoptotic activity is mediated by inhibition of the GZMA-activated DNase, NME1. In the course of cytotoxic T- lymphocyte (CTL)-induced apoptosis, GZMA cleaves SET, disrupting its binding to NME1 and releasing NME1 inhibition. Isoform 1 and isoform 2 are pot…
Cluster_2	Red	23	MCM7	9606.ENSP00000307288	Minichromosome maintenance complex component 7; Acts as component of the MCM2-7 complex (MCM complex) which is the putative replicative helicase essential for 'once per cell cycle' DNA replication initiation and elongation in eukaryotic cells. The active ATPase sites in the MCM2-7 ring are formed through the interaction surfaces of two neighboring subunits such that a critical structure of a cons…
Cluster_2	Red	23	PTMA	9606.ENSP00000344547	Prothymosin, alpha; Prothymosin alpha may mediate immune function by conferring resistance to certain opportunistic infections
Cluster_2	Red	23	DEK	9606.ENSP00000380414	DEK oncogene; Involved in chromatin organization
Cluster_2	Red	23	TMPO	9606.ENSP00000266732	Thymopoietin; May be involved in the structural organization of the nucleus and in the post-mitotic nuclear assembly. Plays an important role, together with LMNA, in the nuclear anchorage of RB1
Cluster_2	Red	23	RAD51AP1	9606.ENSP00000228843	RAD51 associated protein 1; May participate in a common DNA damage response pathway associated with the activation of homologous recombination and double-strand break repair. Functionally cooperates with PALB2 in promoting of D-loop formation by RAD51. Binds to single and double stranded DNA, and is capable of aggregating DNA. Also binds RNA
Cluster_2	Red	23	CCND1	9606.ENSP00000227507	Cyclin D1; Regulatory component of the cyclin D1-CDK4 (DC) complex that phosphorylates and inhibits members of the retinoblastoma (RB) protein family including RB1 and regulates the cell-cycle during G(1)/S transition. Phosphorylation of RB1 allows dissociation of the transcription factor E2F from the RB/E2F complex and the subsequent transcription of E2F target genes which are responsible for th…
Cluster_2	Red	23	MCM5	9606.ENSP00000216122	Minichromosome maintenance complex component 5; Acts as component of the MCM2-7 complex (MCM complex) which is the putative replicative helicase essential for 'once per cell cycle' DNA replication initiation and elongation in eukaryotic cells. The active ATPase sites in the MCM2-7 ring are formed through the interaction surfaces of two neighboring subunits such that a critical structure of a cons…
Cluster_2	Red	23	EXO1	9606.ENSP00000311873	Exonuclease 1; 5'->3' double-stranded DNA exonuclease which may also possess a cryptic 3'->5' double-stranded DNA exonuclease activity. Functions in DNA mismatch repair (MMR) to excise mismatch- containing DNA tracts directed by strand breaks located either 5' or 3' to the mismatch. Also exhibits endonuclease activity against 5'-overhanging flap structures similar to those generated by displaceme…
Cluster_2	Red	23	BRCA2	9606.ENSP00000369497	Breast cancer 2, early onset; Involved in double-strand break repair and/or homologous recombination. Binds RAD51 and potentiates recombinational DNA repair by promoting assembly of RAD51 onto single-stranded DNA (ssDNA). Acts by targeting RAD51 to ssDNA over double-stranded DNA, enabling RAD51 to displace replication protein-A (RPA) from ssDNA and stabilizing RAD51-ssDNA filaments by blocking AT…
Cluster_2	Red	23	DNA2	9606.ENSP00000382133	DNA replication helicase 2 homolog (yeast); Key enzyme involved in DNA replication and DNA repair in nucleus and mitochondrion. Involved in Okazaki fragments processing by cleaving long flaps that escape FEN1: flaps that are longer than 27 nucleotides are coated by replication protein A complex (RPA), leading to recruit DNA2 which cleaves the flap until it is too short to bind RPA and becomes a s…
Cluster_2	Red	23	CSE1L	9606.ENSP00000262982	CSE1 chromosome segregation 1-like (yeast); Export receptor for importin-alpha. Mediates importin- alpha re-export from the nucleus to the cytoplasm after import substrates (cargos) have been released into the nucleoplasm. In the nucleus binds cooperatively to importin-alpha and to the GTPase Ran in its active GTP-bound form. Docking of this trimeric complex to the nuclear pore complex (NPC) is m…
Cluster_2	Red	23	DTL	9606.ENSP00000355958	Denticleless E3 ubiquitin protein ligase homolog (Drosophila); Substrate-specific adapter of a DCX (DDB1-CUL4-X-box) E3 ubiquitin-protein ligase complex required for cell cycle control, DNA damage response and translesion DNA synthesis. The DCX(DTL) complex, also named CRL4(CDT2) complex, mediates the polyubiquitination and subsequent degradation of CDT1, CDKN1A/p21(CIP1), FBXO18/FBH1 and KMT5A (…
Cluster_2	Red	23	MCM10	9606.ENSP00000354945	Minichromosome maintenance complex component 10; Acts as a replication initiation factor that brings together the MCM2-7 helicase and the DNA polymerase alpha/primase complex in order to initiate DNA replication. Additionally, plays a role in preventing DNA damage during replication. Key effector of the RBBP6 and ZBTB38-mediated regulation of DNA-replication and common fragile sites stability; ac…
Cluster_2	Red	23	FANCD2	9606.ENSP00000287647	Fanconi anemia, complementation group D2; Required for maintenance of chromosomal stability. Promotes accurate and efficient pairing of homologs during meiosis. Involved in the repair of DNA double-strand breaks, both by homologous recombination and single-strand annealing. May participate in S phase and G2 phase checkpoint activation upon DNA damage. Plays a role in preventing breakage and loss …
Cluster_2	Red	23	DDX11	9606.ENSP00000384703	DEAD/H (Asp-Glu-Ala-Asp/His) box helicase 11; DNA helicase involved in cellular proliferation. Possesses DNA-dependent ATPase and helicase activities. This helicase translocates on single-stranded DNA in the 5' to 3' direction in the presence of ATP and, to a lesser extent, dATP. Its unwinding activity requires a 5'-single-stranded region for helicase loading, since flush-ended duplex structures …
Cluster_2	Red	23	XRCC2	9606.ENSP00000352271	X-ray repair complementing defective repair in Chinese hamster cells 2; Involved in the homologous recombination repair (HRR) pathway of double-stranded DNA, thought to repair chromosomal fragmentation, translocations and deletions. Part of the Rad21 paralog protein complex BCDX2 which acts in the BRCA1-BRCA2- dependent HR pathway. Upon DNA damage, BCDX2 acts downstream of BRCA2 recruitment and u…
Cluster_2	Red	23	FANCL	9606.ENSP00000385021	Fanconi anemia, complementation group L; Ubiquitin ligase protein that mediates monoubiquitination of FANCD2, a key step in the DNA damage pathway. Also mediates monoubiquitination of FANCI. May stimulate the ubiquitin release from UBE2W. May be required for proper primordial germ cell proliferation in the embryonic stage, whereas it is probably not needed for spermatogonial proliferation after b…
Cluster_2	Red	23	DUT	9606.ENSP00000370376	Deoxyuridine triphosphatase; This enzyme is involved in nucleotide metabolism: it produces dUMP, the immediate precursor of thymidine nucleotides and it decreases the intracellular concentration of dUTP so that uracil cannot be incorporated into DNA
Cluster_3	Yellow	20	CCNA2	9606.ENSP00000274026	Cyclin A2; Essential for the control of the cell cycle at the G1/S (start) and the G2/M (mitosis) transitions
Cluster_3	Yellow	20	CENPF	9606.ENSP00000355922	Centromere protein F, 350/400kDa (mitosin); Required for kinetochore function and chromosome segregation in mitosis. Required for kinetochore localization of dynein, LIS1, NDE1 and NDEL1. Regulates recycling of the plasma membrane by acting as a link between recycling vesicles and the microtubule network though its association with STX4 and SNAP25. Acts as a potential inhibitor of pocket protein-…
Cluster_3	Yellow	20	KIF23	9606.ENSP00000260363	Kinesin family member 23; Component of the centralspindlin complex that serves as a microtubule-dependent and Rho-mediated signaling required for the myosin contractile ring formation during the cell cycle cytokinesis. Essential for cytokinesis in Rho-mediated signaling. Required for the localization of ECT2 to the central spindle. Plus-end-directed motor enzyme that moves antiparallel microtubul…
Cluster_3	Yellow	20	NDC80	9606.ENSP00000261597	NDC80 kinetochore complex component homolog (S. cerevisiae); Acts as a component of the essential kinetochore- associated NDC80 complex, which is required for chromosome segregation and spindle checkpoint activity (PubMed:9315664, PubMed:12351790, PubMed:14654001, PubMed:14699129, PubMed:15062103, PubMed:15235793, PubMed:15239953, PubMed:15548592, PubMed:16732327). Required for kinetochore integr…
Cluster_3	Yellow	20	CDCA5	9606.ENSP00000275517	Cell division cycle associated 5; Regulator of sister chromatid cohesion in mitosis stabilizing cohesin complex association with chromatin. May antagonize the action of WAPL which stimulates cohesin dissociation from chromatin. Cohesion ensures that chromosome partitioning is accurate in both meiotic and mitotic cells and plays an important role in DNA repair. Required for efficient DNA double-st…
Cluster_3	Yellow	20	C15orf23	9606.ENSP00000249776	Chromosome 15 open reading frame 23; Essential component of the mitotic spindle required for faithful chromosome segregation and progression into anaphase (PubMed:19667759). Promotes the metaphase-to-anaphase transition and is required for chromosome alignment, normal timing of sister chromatid segregation, and maintenance of spindle pole architecture (PubMed:19667759, PubMed:22110139). The astri…
Cluster_3	Yellow	20	KIF20B	9606.ENSP00000260753	Kinesin family member 20B; Plus-end-directed motor enzyme that is required for completion of cytokinesis (PubMed:11470801, PubMed:12740395). Required for proper midbody organization and abscission in polarized cortical stem cells. Plays a role in the regulation of neuronal polarization by mediating the transport of specific cargos. Participates in the mobilization of SHTN1 and in the accumulation…
Cluster_3	Yellow	20	DEPDC1B	9606.ENSP00000265036	DEP domain containing 1B
Cluster_3	Yellow	20	TMEM48	9606.ENSP00000360483	Transmembrane protein 48; Component of the nuclear pore complex (NPC), which plays a key role in de novo assembly and insertion of NPC in the nuclear envelope. Required for NPC and nuclear envelope assembly, possibly by forming a link between the nuclear envelope membrane and soluble nucleoporins, thereby anchoring the NPC in the membrane
Cluster_3	Yellow	20	MAD2L1	9606.ENSP00000296509	MAD2 mitotic arrest deficient-like 1 (yeast); Component of the spindle-assembly checkpoint that prevents the onset of anaphase until all chromosomes are properly aligned at the metaphase plate. Required for the execution of the mitotic checkpoint which monitors the process of kinetochore- spindle attachment and inhibits the activity of the anaphase promoting complex by sequestering CDC20 until al…
Cluster_3	Yellow	20	MND1	9606.ENSP00000240488	Meiotic nuclear divisions 1 homolog (S. cerevisiae); Required for proper homologous chromosome pairing and efficient cross-over and intragenic recombination during meiosis (By similarity). Stimulates both DMC1- and RAD51-mediated homologous strand assimilation, which is required for the resolution of meiotic double-strand breaks
Cluster_3	Yellow	20	RPS27A	9606.ENSP00000272317	Ribosomal protein S27a; Ubiquitin: Exists either covalently attached to another protein, or free (unanchored). When covalently bound, it is conjugated to target proteins via an isopeptide bond either as a monomer (monoubiquitin), a polymer linked via different Lys residues of the ubiquitin (polyubiquitin chains) or a linear polymer linked via the initiator Met of the ubiquitin (linear polyubiquit…
Cluster_3	Yellow	20	HMMR	9606.ENSP00000377492	Hyaluronan-mediated motility receptor (RHAMM); Involved in cell motility. When hyaluronan binds to HMMR, the phosphorylation of a number of proteins, including PTK2/FAK1 occurs. May also be involved in cellular transformation and metastasis formation, and in regulating extracellular- regulated kinase (ERK) activity
Cluster_3	Yellow	20	MIS18BP1	9606.ENSP00000309790	MIS18 binding protein 1; Required for recruitment of CENPA to centromeres and normal chromosome segregation during mitosis
Cluster_3	Yellow	20	MLF1IP	9606.ENSP00000281453	MLF1 interacting protein; Component of the CENPA-NAC (nucleosome-associated) complex, a complex that plays a central role in assembly of kinetochore proteins, mitotic progression and chromosome segregation. The CENPA-NAC complex recruits the CENPA-CAD (nucleosome distal) complex and may be involved in incorporation of newly synthesized CENPA into centromeres. Plays an important role in the correc…
Cluster_3	Yellow	20	CENPE	9606.ENSP00000265148	Centromere protein E, 312kDa; Essential for the maintenance of chromosomal stability through efficient stabilization of microtubule capture at kinetochores. Plays a key role in the movement of chromosomes toward the metaphase plate during mitosis. Is a slow plus end- directed motor whose activity is essential for metaphase chromosome alignment. Couples chromosome position to microtubule depolymer…
Cluster_3	Yellow	20	FBXO5	9606.ENSP00000229758	F-box protein 5; Regulates progression through early mitosis by inhibiting the anaphase promoting complex/cyclosome (APC). Binds to the APC activators CDC20 and FZR1/CDH1 to prevent APC activation. Can also bind directly to the APC to inhibit substrate-binding
Cluster_3	Yellow	20	HJURP	9606.ENSP00000414109	Holliday junction recognition protein; Centromeric protein that plays a central role in the incorporation and maintenance of histone H3-like variant CENPA at centromeres. Acts as a specific chaperone for CENPA and is required for the incorporation of newly synthesized CENPA molecules into nucleosomes at replicated centromeres. Prevents CENPA-H4 tetramerization and prevents premature DNA binding b…
Cluster_3	Yellow	20	CCNB1	9606.ENSP00000256442	Cyclin B1; Essential for the control of the cell cycle at the G2/M (mitosis) transition
Cluster_3	Yellow	20	FAM83D	9606.ENSP00000217429	Family with sequence similarity 83, member D; Probable proto-oncogene that regulates cell proliferation, growth, migration and epithelial to mesenchymal transition. Through the degradation of FBXW7, may act indirectly on the expression and downstream signaling of MTOR, JUN and MYC (PubMed:24344117). May play also a role in cell proliferation through activation of the ERK1/ERK2 signaling cascade (…
Cluster_4	Green	12	TKT	9606.ENSP00000405455	Transketolase; Catalyzes the transfer of a two-carbon ketol group from a ketose donor to an aldose acceptor, via a covalent intermediate with the cofactor thiamine pyrophosphate
Cluster_4	Green	12	MAK16	9606.ENSP00000353246	MAK16 homolog (S. cerevisiae)
Cluster_4	Green	12	UTP20	9606.ENSP00000261637	UTP20, small subunit (SSU) processome component, homolog (yeast); Involved in 18S pre-rRNA processing. Associates with U3 snoRNA
Cluster_4	Green	12	NOP16	9606.ENSP00000373810	NOP16 nucleolar protein homolog (yeast)
Cluster_4	Green	12	NOC3L	9606.ENSP00000360412	Nucleolar complex associated 3 homolog (S. cerevisiae); May be required for adipogenesis
Cluster_4	Green	12	DDX21	9606.ENSP00000346120	DEAD (Asp-Glu-Ala-Asp) box helicase 21; RNA helicase that acts as a sensor of the transcriptional status of both RNA polymerase (Pol) I and II: promotes ribosomal RNA (rRNA) processing and transcription from polymerase II (Pol II) (PubMed:25470060). Binds various RNAs, such as rRNAs, snoRNAs, 7SK and, at lower extent, mRNAs (PubMed:25470060). In the nucleolus, localizes to rDNA locus, where it di…
Cluster_4	Green	12	RRP12	9606.ENSP00000360031	Ribosomal RNA processing 12 homolog (S. cerevisiae)
Cluster_4	Green	12	PAK1IP1	9606.ENSP00000368887	PAK1 interacting protein 1; Negatively regulates the PAK1 kinase. PAK1 is a member of the PAK kinase family, which have been shown to play a positive role in the regulation of signaling pathways involving MAPK8 and RELA. PAK1 exists as an inactive homodimer, which is activated by binding of small GTPases such as CDC42 to an N-terminal regulatory domain. PAK1IP1 also binds to the N-terminus of PAK…
Cluster_4	Green	12	PES1	9606.ENSP00000346725	Pescadillo ribosomal biogenesis factor 1; Component of the PeBoW complex, which is required for maturation of 28S and 5.8S ribosomal RNAs and formation of the 60S ribosome
Cluster_4	Green	12	EXOSC9	9606.ENSP00000368984	Exosome component 9; Non-catalytic component of the RNA exosome complex which has 3'->5' exoribonuclease activity and participates in a multitude of cellular RNA processing and degradation events. In the nucleus, the RNA exosome complex is involved in proper maturation of stable RNA species such as rRNA, snRNA and snoRNA, in the elimination of RNA processing by-products and non-coding 'pervasive'…
Cluster_4	Green	12	WDR12	9606.ENSP00000261015	WD repeat domain 12; Component of the PeBoW complex, which is required for maturation of 28S and 5.8S ribosomal RNAs and formation of the 60S ribosome
Cluster_4	Green	12	POLR1B	9606.ENSP00000263331	Polymerase (RNA) I polypeptide B, 128kDa; DNA-dependent RNA polymerase catalyzes the transcription of DNA into RNA using the four ribonucleoside triphosphates as substrates. Second largest core component of RNA polymerase I which synthesizes ribosomal RNA precursors. Proposed to contribute to the polymerase catalytic activity and forms the polymerase active center together with the largest subuni…
Cluster_5	Blue	7	HSPE1	9606.ENSP00000233893	Heat shock 10kDa protein 1 (chaperonin 10); Eukaryotic CPN10 homolog which is essential for mitochondrial protein biogenesis, together with CPN60. Binds to CPN60 in the presence of Mg-ATP and suppresses the ATPase activity of the latter
Cluster_5	Blue	7	FKBP4	9606.ENSP00000001008	FK506 binding protein 4, 59kDa; Immunophilin protein with PPIase and co-chaperone activities. Component of steroid receptors heterocomplexes through interaction with heat-shock protein 90 (HSP90). May play a role in the intracellular trafficking of heterooligomeric forms of steroid hormone receptors between cytoplasm and nuclear compartments. The isomerase activity controls neuronal growth cones …
Cluster_5	Blue	7	DNAJA1	9606.ENSP00000369127	DnaJ (Hsp40) homolog, subfamily A, member 1; Co-chaperone for HSPA8/Hsc70 (PubMed:10816573). Stimulates ATP hydrolysis, but not the folding of unfolded proteins mediated by HSPA1A (in vitro) (PubMed:24318877). Plays a role in protein transport into mitochondria via its role as co- chaperone. Functions as co-chaperone for HSPA1B and negatively regulates the translocation of BAX from the cytosol to…
Cluster_5	Blue	7	CBS	9606.ENSP00000344460	Cystathionine-beta-synthase; Hydro-lyase catalyzing the first step of the transsulfuration pathway, where the hydroxyl group of L-serine is displaced by L-homocysteine in a beta-replacement reaction to form L-cystathionine, the precursor of L-cysteine. This catabolic route allows the elimination of L-methionine and the toxic metabolite L- homocysteine. Also involved in the production of hydrogen …
Cluster_5	Blue	7	HSPH1	9606.ENSP00000318687	Heat shock 105kDa/110kDa protein 1; Prevents the aggregation of denatured proteins in cells under severe stress, on which the ATP levels decrease markedly. Inhibits HSPA8/HSC70 ATPase and chaperone activities (By similarity)
Cluster_5	Blue	7	ZCCHC17	9606.ENSP00000343557	Zinc finger, CCHC domain containing 17
Cluster_5	Blue	7	DNAJB6	9606.ENSP00000262177	DnaJ (Hsp40) homolog, subfamily B, member 6; Plays an indispensable role in the organization of KRT8/KRT18 filaments. Acts as an endogenous molecular chaperone for neuronal proteins including huntingtin. Suppresses aggregation and toxicity of polyglutamine-containing, aggregation-prone proteins. Isoform B but not isoform A inhibits huntingtin aggregation. Has a stimulatory effect on the ATPase ac…

## Sheet: STRING_DE
#cluster name	cluster color	gene count	protein name	protein identifier	protein description
Cluster_1	Blue	114	ARHGEF5	9606.ENSP00000056217	Rho guanine nucleotide exchange factor (GEF) 5; Guanine nucleotide exchange factor which activates Rho GTPases (PubMed:15601624). Strongly activates RHOA (PubMed:15601624). Also strongly activates RHOB, weakly activates RHOC and RHOG and shows no effect on RHOD, RHOV, RHOQ or RAC1 (By similarity). Involved in regulation of cell shape and actin cytoskeletal organization (PubMed:15601624). Plays a …
Cluster_1	Blue	114	FAM20A	9606.ENSP00000468308	Family with sequence similarity 20, member A; Pseudokinase that acts as an allosteric activator of the Golgi serine/threonine protein kinase FAM20C and is involved in biomineralization of teeth. Forms a complex with FAM20C and increases the ability of FAM20C to phosphorylate the proteins that form the 'matrix' that guides the deposition of the enamel minerals
Cluster_1	Blue	114	RNF130	9606.ENSP00000430237	Ring finger protein 130; May have a role during the programmed cell death of hematopoietic cells (By similarity). Acts as an E3 ubiquitin- protein ligase
Cluster_1	Blue	114	RHOBTB3	9606.ENSP00000369318	Rho-related BTB domain containing 3; Rab9-regulated ATPase required for endosome to Golgi transport. Involved in transport vesicle docking at the Golgi complex, possibly by participating in release M6PRBP1/TIP47 from vesicles to permit their efficient docking and fusion at the Golgi. Specifically binds Rab9, but not other Rab proteins. Has low intrinsic ATPase activity due to autoinhibition, whic…
Cluster_1	Blue	114	PDK1	9606.ENSP00000282077	Pyruvate dehydrogenase kinase, isozyme 1; Kinase that plays a key role in regulation of glucose and fatty acid metabolism and homeostasis via phosphorylation of the pyruvate dehydrogenase subunits PDHA1 and PDHA2. This inhibits pyruvate dehydrogenase activity, and thereby regulates metabolite flux through the tricarboxylic acid cycle, down-regulates aerobic respiration and inhibits the formation …
Cluster_1	Blue	114	SLC5A9	9606.ENSP00000236495	Solute carrier family 5 (sodium/glucose cotransporter), member 9; Involved in sodium-dependent transport of D-mannose, D- glucose and D-fructose
Cluster_1	Blue	114	CYP26A1	9606.ENSP00000224356	Cytochrome P450, family 26, subfamily A, polypeptide 1; Plays a key role in retinoic acid metabolism. Acts on retinoids, including all-trans-retinoic acid (RA) and its stereoisomer 9-cis-RA. Capable of both 4-hydroxylation and 18- hydroxylation. Responsible for generation of several hydroxylated forms of RA, including 4-OH-RA, 4-oxo-RA and 18-OH-RA
Cluster_1	Blue	114	CER1	9606.ENSP00000370297	Cerberus 1, cysteine knot superfamily, homolog (Xenopus laevis); Cytokine that may play a role in anterior neural induction and somite formation during embryogenesis in part through a BMP-inhibitory mechanism. Can regulate Nodal signaling during gastrulation as well as the formation and patterning of the primitive streak (By similarity)
Cluster_1	Blue	114	CEP70	9606.ENSP00000264982	Centrosomal protein 70kDa; Plays a role in the organization of both preexisting and nascent microtubules in interphase cells. During mitosis, required for the organization and orientation of the mitotic spindle
Cluster_1	Blue	114	DSCAM	9606.ENSP00000383303	Down syndrome cell adhesion molecule; Cell adhesion molecule that plays a role in neuronal self-avoidance. Promotes repulsion between specific neuronal processes of either the same cell or the same subtype of cells. Mediates within retinal amacrine and ganglion cell subtypes both isoneuronal self-avoidance for creating an orderly dendritic arborization and heteroneuronal self-avoidance to maintai…
Cluster_1	Blue	114	FEZ1	9606.ENSP00000278919	Fasciculation and elongation protein zeta 1 (zygin I); May be involved in axonal outgrowth as component of the network of molecules that regulate cellular morphology and axon guidance machinery. Able to restore partial locomotion and axonal fasciculation to C.elegans unc-76 mutants in germline transformation experiments. May participate in the transport of mitochondria and other cargos along micr…
Cluster_1	Blue	114	ANKS1B	9606.ENSP00000449629	Ankyrin repeat and sterile alpha motif domain containing 1B; Isoform 2 may participate in the regulation of nucleoplasmic coilin protein interactions in neuronal and transformed cells
Cluster_1	Blue	114	SFRP1	9606.ENSP00000220772	Secreted frizzled-related protein 1; Soluble frizzled-related proteins (sFRPS) function as modulators of Wnt signaling through direct interaction with Wnts. They have a role in regulating cell growth and differentiation in specific cell types. SFRP1 decreases intracellular beta-catenin levels (By similarity). Has antiproliferative effects on vascular cells, in vitro and in vivo, and can induce, i…
Cluster_1	Blue	114	TRABD2B	9606.ENSP00000456730	TraB domain containing 2B; Metalloprotease that acts as a negative regulator of the Wnt signaling pathway by mediating the cleavage of the 8 N- terminal residues of a subset of Wnt proteins. Following cleavage, Wnt proteins become oxidized and form large disulfide-bond oligomers, leading to their inactivation. Able to cleave WNT3A, WNT5, but not WNT11. Required for head formation
Cluster_1	Blue	114	XK	9606.ENSP00000367879	X-linked Kx blood group (McLeod syndrome); May be involved in sodium-dependent transport of neutral amino acids or oligopeptides
Cluster_1	Blue	114	EOMES	9606.ENSP00000295743	Eomesodermin; Functions as a transcriptional activator playing a crucial role during development. Functions in trophoblast differentiation and later in gastrulation, regulating both mesoderm delamination and endoderm specification. Plays a role in brain development being required for the specification and the proliferation of the intermediate progenitor cells and their progeny in the cerebral cor…
Cluster_1	Blue	114	SLCO2A1	9606.ENSP00000311291	Solute carrier organic anion transporter family, member 2A1; May mediate the release of newly synthesized prostaglandins from cells, the transepithelial transport of prostaglandins, and the clearance of prostaglandins from the circulation. Transports PGD2, as well as PGE1, PGE2 and PGF2A
Cluster_1	Blue	114	PRKD3	9606.ENSP00000234179	Protein kinase D3; Converts transient diacylglycerol (DAG) signals into prolonged physiological effects, downstream of PKC. Involved in resistance to oxidative stress (By similarity)
Cluster_1	Blue	114	MCC	9606.ENSP00000386227	Mutated in colorectal cancers; Candidate for the putative colorectal tumor suppressor gene located at 5q21. Suppresses cell proliferation and the Wnt/b- catenin pathway in colorectal cancer cells. Inhibits DNA binding of b-catenin/TCF/LEF transcription factors. Involved in cell migration independently of RAC1, CDC42 and p21-activated kinase (PAK) activation (PubMed:18591935, PubMed:19555689, PubM…
Cluster_1	Blue	114	ABCC4	9606.ENSP00000366084	ATP-binding cassette, sub-family C (CFTR/MRP), member 4; May be an organic anion pump relevant to cellular detoxification
Cluster_1	Blue	114	B3GNT5	9606.ENSP00000316173	UDP-GlcNAc:betaGal beta-1,3-N-acetylglucosaminyltransferase 5; Beta-1,3-N-acetylglucosaminyltransferase that plays a key role in the synthesis of lacto- or neolacto-series carbohydrate chains on glycolipids, notably by participating in biosynthesis of HNK-1 and Lewis X carbohydrate structures. Has strong activity toward lactosylceramide (LacCer) and neolactotetraosylceramide (nLc(4)Cer; paraglobo…
Cluster_1	Blue	114	ADAM19	9606.ENSP00000257527	ADAM metallopeptidase domain 19; Participates in the proteolytic processing of beta-type neuregulin isoforms which are involved in neurogenesis and synaptogenesis, suggesting a regulatory role in glial cell. Also cleaves alpha-2 macroglobulin. May be involved in osteoblast differentiation and/or osteoblast activity in bone (By similarity)
Cluster_1	Blue	114	DTWD2	9606.ENSP00000425048	DTW domain containing 2
Cluster_1	Blue	114	SOCS2	9606.ENSP00000339428	Suppressor of cytokine signaling 2; SOCS family proteins form part of a classical negative feedback system that regulates cytokine signal transduction. SOCS2 appears to be a negative regulator in the growth hormone/IGF1 signaling pathway. Probable substrate recognition component of a SCF-like ECS (Elongin BC-CUL2/5-SOCS-box protein) E3 ubiquitin- protein ligase complex which mediates the ubiquiti…
Cluster_1	Blue	114	NINL	9606.ENSP00000278886	Ninein-like; Involved in the microtubule organization in interphase cells. Overexpression induces the fragmentation of the Golgi, and causes lysosomes to disperse toward the cell periphery; it also interferes with mitotic spindle assembly. May play a role in ovarian carcinogenesis
Cluster_1	Blue	114	IFLTD1	9606.ENSP00000407353	Intermediate filament tail domain containing 1
Cluster_1	Blue	114	GATA6	9606.ENSP00000269216	GATA binding protein 6; Transcriptional activator that regulates SEMA3C and PLXNA2 (PubMed:19666519). Involved in gene regulation specifically in the gastric epithelium (PubMed:9315713). May regulate genes that protect epithelial cells from bacterial infection (PubMed:16968778). Involved in bone morphogenetic protein (BMP)- mediated cardiac-specific gene expression (By similarity). Binds to BMP r…
Cluster_1	Blue	114	CEP55	9606.ENSP00000360540	Centrosomal protein 55kDa; Plays a role in mitotic exit and cytokinesis. Not required for microtubule nucleation. Recruits PDCD6IP and TSG101 to midbody during cytokinesis
Cluster_1	Blue	114	ARSE	9606.ENSP00000370526	Arylsulfatase E (chondrodysplasia punctata 1); May be essential for the correct composition of cartilage and bone matrix during development. Has no activity toward steroid sulfates
Cluster_1	Blue	114	GPR111	9606.ENSP00000296862	G protein-coupled receptor 111; Orphan receptor
Cluster_1	Blue	114	BMPER	9606.ENSP00000297161	BMP binding endothelial regulator; Inhibitor of bone morphogenetic protein (BMP) function, it may regulate BMP responsiveness of osteoblasts and chondrocytes
Cluster_1	Blue	114	EPHA4	9606.ENSP00000281821	EPH receptor A4; Receptor tyrosine kinase which binds membrane-bound ephrin family ligands residing on adjacent cells, leading to contact-dependent bidirectional signaling into neighboring cells. The signaling pathway downstream of the receptor is referred to as forward signaling while the signaling pathway downstream of the ephrin ligand is referred to as reverse signaling. Highly promiscuous, i…
Cluster_1	Blue	114	GABARAPL1	9606.ENSP00000266458	GABA(A) receptor-associated protein like 1; Ubiquitin-like modifier that increases cell-surface expression of kappa-type opioid receptor through facilitating anterograde intracellular trafficking of the receptor. Involved in formation of autophagosomal vacuoles. Whereas LC3s are involved in elongation of the phagophore membrane, the GABARAP/GATE-16 subfamily is essential for a later stage in auto…
Cluster_1	Blue	114	CPE	9606.ENSP00000386104	Carboxypeptidase E; Removes residual C-terminal Arg or Lys remaining after initial endoprotease cleavage during prohormone processing. Processes proinsulin
Cluster_1	Blue	114	OBSCN	9606.ENSP00000455507	Obscurin, cytoskeletal calmodulin and titin-interacting RhoGEF
Cluster_1	Blue	114	ST6GAL1	9606.ENSP00000169298	ST6 beta-galactosamide alpha-2,6-sialyltranferase 1; Transfers sialic acid from CMP-sialic acid to galactose- containing acceptor substrates
Cluster_1	Blue	114	CCDC113	9606.ENSP00000219299	Coiled-coil domain containing 113; Component of centriolar satellites contributing to primary cilium formation
Cluster_1	Blue	114	COLEC12	9606.ENSP00000383115	Collectin sub-family member 12; Scavenger receptor that displays several functions associated with host defense. Promotes binding and phagocytosis of Gram-positive, Gram-negative bacteria and yeast. Mediates the recognition, internalization and degradation of oxidatively modified low density lipoprotein (oxLDL) by vascular endothelial cells. Binds to several carbohydrates including Gal-type ligan…
Cluster_1	Blue	114	NUDT4	9606.ENSP00000338352	Nudix (nucleoside diphosphate linked moiety X)-type motif 4; Cleaves a beta-phosphate from the diphosphate groups in PP-InsP5 (diphosphoinositol pentakisphosphate), PP-InsP4 and [PP]2-InsP4 (bisdiphosphoinositol tetrakisphosphate), suggesting that it may play a role in signal transduction. Also able to catalyze the hydrolysis of dinucleoside oligophosphate Ap6A, but not Ap5A. The major reaction p…
Cluster_1	Blue	114	TRPA1	9606.ENSP00000262209	Transient receptor potential cation channel, subfamily A, member 1; Receptor-activated non-selective cation channel involved in detection of pain and possibly also in cold perception and inner ear function (PubMed:25389312, PubMed:25855297). Has a central role in the pain response to endogenous inflammatory mediators and to a diverse array of volatile irritants, such as mustard oil, cinnamaldehyd…
Cluster_1	Blue	114	SERPINE2	9606.ENSP00000415786	Serpin peptidase inhibitor, clade E (nexin, plasminogen activator inhibitor type 1), member 2; Serine protease inhibitor with activity toward thrombin, trypsin, and urokinase. Promotes neurite extension by inhibiting thrombin. Binds heparin
Cluster_1	Blue	114	GRIPAP1	9606.ENSP00000365624	GRIP1 associated protein 1
Cluster_1	Blue	114	SACM1L	9606.ENSP00000373713	SAC1 suppressor of actin mutations 1-like (yeast); Phosphoinositide phosphatase that hydrolyzes phosphatidylinositol 3-phosphate (PtdIns(3)P) and phosphatidylinositol 4-phosphate (PtdIns(4)P) (PubMed:24209621). Has low activity towards PtdIns(3,5)P2 (By similarity)
Cluster_1	Blue	114	AGL	9606.ENSP00000294724	Amylo-alpha-1, 6-glucosidase, 4-alpha-glucanotransferase; Multifunctional enzyme acting as 1,4-alpha-D-glucan:1,4- alpha-D-glucan 4-alpha-D-glycosyltransferase and amylo-1,6- glucosidase in glycogen degradation
Cluster_1	Blue	114	PLCXD3	9606.ENSP00000333751	Phosphatidylinositol-specific phospholipase C, X domain containing 3
Cluster_1	Blue	114	ELMO1	9606.ENSP00000312185	Engulfment and cell motility 1; Involved in cytoskeletal rearrangements required for phagocytosis of apoptotic cells and cell motility. Acts in assocation with DOCK1 and CRK. Was initially proposed to be required in complex with DOCK1 to activate Rac Rho small GTPases. May enhance the guanine nucleotide exchange factor (GEF) activity of DOCK1
Cluster_1	Blue	114	ZDHHC21	9606.ENSP00000370303	Zinc finger, DHHC-type containing 21; Palmitoylates sex steroid hormone receptors, including ESR1, PGR and AR, thereby regulating their targeting to the plasma membrane. This affects rapid intracellular signaling by sex hormones via ERK and AKT kinases and the generation of cAMP, but does not affect that mediated by their nuclear receptor (By similarity)
Cluster_1	Blue	114	GPSM2	9606.ENSP00000264126	G-protein signaling modulator 2; Plays an important role in mitotic spindle pole organization via its interaction with NUMA1 (PubMed:15632202, PubMed:21816348). Plays an important role in asymmetric cell divisions (PubMed:21816348). Has guanine nucleotide dissociation inhibitor (GDI) activity towards G(i) alpha proteins, such as GNAI1 and GNAI3, and thereby regulates their activity (By similarity)
Cluster_1	Blue	114	VANGL1	9606.ENSP00000310800	Vang-like 1 (van gogh, Drosophila)
Cluster_1	Blue	114	FAM184A	9606.ENSP00000342604	Family with sequence similarity 184, member A
Cluster_1	Blue	114	MGST2	9606.ENSP00000265498	Microsomal glutathione S-transferase 2; Can catalyze the production of LTC4 from LTA4 and reduced glutathione. Can catalyze the conjugation of 1-chloro-2,4- dinitrobenzene with reduced glutathione
Cluster_1	Blue	114	ZSWIM7	9606.ENSP00000382218	Zinc finger, SWIM-type containing 7; Involved in early stages of the homologous recombination repair (HRR) pathway of double-stranded DNA breaks arising during DNA replication or induced by DNA-damaging agents
Cluster_1	Blue	114	SYT4	9606.ENSP00000255224	Synaptotagmin IV; May be involved in Ca(2+)-dependent exocytosis of secretory vesicles through Ca(2+) and phospholipid binding to the C2 domain or may serve as Ca(2+) sensors in the process of vesicular trafficking and exocytosis (By similarity). Plays a role in dendrite formation by melanocytes (PubMed:23999003)
Cluster_1	Blue	114	PDE10A	9606.ENSP00000438284	Phosphodiesterase 10A; Plays a role in signal transduction by regulating the intracellular concentration of cyclic nucleotides. Can hydrolyze both cAMP and cGMP, but has higher affinity for cAMP and is more efficient with cAMP as substrate
Cluster_1	Blue	114	SYN3	9606.ENSP00000330219	Synapsin III; May be involved in the regulation of neurotransmitter release and synaptogenesis
Cluster_1	Blue	114	GATA4	9606.ENSP00000334458	GATA binding protein 4; Transcriptional activator that binds to the consensus sequence 5'-AGATAG-3' and plays a key role in cardiac development (PubMed:24000169). Involved in bone morphogenetic protein (BMP)- mediated induction of cardiac-specific gene expression (By similarity). Binds to BMP response element (BMPRE) DNA sequences within cardiac activating regions (By similarity). Acts as a trans…
Cluster_1	Blue	114	NUAK1	9606.ENSP00000261402	NUAK family, SNF1-like kinase, 1; Serine/threonine-protein kinase involved in various processes such as cell adhesion, regulation of cell ploidy and senescence, cell proliferation and tumor progression. Phosphorylates ATM, CASP6, LATS1, PPP1R12A and p53/TP53. Acts as a regulator of cellular senescence and cellular ploidy by mediating phosphorylation of 'Ser-464' of LATS1, thereby controlling its …
Cluster_1	Blue	114	EIF3B	9606.ENSP00000354125	Eukaryotic translation initiation factor 3, subunit B; Component of the eukaryotic translation initiation factor 3 (eIF-3) complex, which is required for several steps in the initiation of protein synthesis. The eIF-3 complex associates with the 40S ribosome and facilitates the recruitment of eIF-1, eIF-1A, eIF-2:GTP:methionyl-tRNAi and eIF-5 to form the 43S pre- initiation complex (43S PIC). The…
Cluster_1	Blue	114	USP3	9606.ENSP00000369681	Ubiquitin specific peptidase 3; Hydrolase that deubiquitinates monoubiquitinated target proteins such as histone H2A and H2B. Required for proper progression through S phase and subsequent mitotic entry. May regulate the DNA damage response (DDR) checkpoint through deubiquitination of H2A at DNA damage sites. Associates with the chromatin
Cluster_1	Blue	114	TCP11L1	9606.ENSP00000335595	T-complex 11, testis-specific-like 1
Cluster_1	Blue	114	BCAR3	9606.ENSP00000260502	Breast cancer anti-estrogen resistance 3; May act as an adapter protein and couple activated growth factor receptors to a signaling pathway that regulates the proliferation in breast cancer cells. When overexpressed, it confers anti-estrogen resistance in breast cancer cell lines. May also be regulated by cellular adhesion to extracellular matrix proteins
Cluster_1	Blue	114	SNAPC3	9606.ENSP00000370200	Small nuclear RNA activating complex, polypeptide 3, 50kDa; Part of the SNAPc complex required for the transcription of both RNA polymerase II and III small-nuclear RNA genes. Binds to the proximal sequence element (PSE), a non-TATA-box basal promoter element common to these 2 types of genes. Recruits TBP and BRF2 to the U6 snRNA TATA box
Cluster_1	Blue	114	FAR2	9606.ENSP00000182377	Fatty acyl CoA reductase 2; Catalyzes the reduction of fatty acyl-CoA to fatty alcohols. The preferred substrates are C16, C18, C18:1 and C18:2 but low activity can be observed with C10-C14 substrates
Cluster_1	Blue	114	TSPAN12	9606.ENSP00000222747	Tetraspanin 12; Regulator of cell surface receptor signal transduction. Plays a central role in retinal vascularization by regulating norrin (NDP) signal transduction. Acts in concert with norrin (NDP) to promote FZD4 multimerization and subsequent activation of FZD4, leading to promote accumulation of beta-catenin (CTNNB1) and stimulate LEF/TCF-mediated transcriptional programs. Suprisingly, it …
Cluster_1	Blue	114	FAM159B	9606.ENSP00000373726	Family with sequence similarity 159, member B
Cluster_1	Blue	114	GREB1	9606.ENSP00000234142	Growth regulation by estrogen in breast cancer 1; May play a role in estrogen-stimulated cell proliferation. Acts as a regulator of hormone-dependent cancer growth in breast and prostate cancers
Cluster_1	Blue	114	YEATS2	9606.ENSP00000306983	YEATS domain containing 2; Component of the ATAC complex, a complex with histone acetyltransferase activity on histones H3 and H4
Cluster_1	Blue	114	PPP1R16B	9606.ENSP00000299824	Protein phosphatase 1, regulatory subunit 16B; Regulator of protein phosphatase 1 (PP1) that acts as a positive regulator of pulmonary endothelial cell (EC) barrier function. Involved in PKA-mediated moesin dephosphorylation which is important in EC barrier protection against thrombin stimulation. Promotes the interaction of PPP1CA with RPSA/LAMR1 and in turn facilitates the dephosphorylation of …
Cluster_1	Blue	114	RNF8	9606.ENSP00000362578	Ring finger protein 8, E3 ubiquitin protein ligase; E3 ubiquitin-protein ligase that plays a key role in DNA damage signaling via 2 distinct roles: by mediating the 'Lys-63'- linked ubiquitination of histones H2A and H2AX and promoting the recruitment of DNA repair proteins at double-strand breaks (DSBs) sites, and by catalyzing 'Lys-48'-linked ubiquitination to remove target proteins from DNA da…
Cluster_1	Blue	114	ROR2	9606.ENSP00000364860	Receptor tyrosine kinase-like orphan receptor 2; Tyrosine-protein kinase receptor which may be involved in the early formation of the chondrocytes. It seems to be required for cartilage and growth plate development (By similarity). Phosphorylates YWHAB, leading to induction of osteogenesis and bone formation (PubMed:17717073). In contrast, has also been shown to have very little tyrosine kinase a…
Cluster_1	Blue	114	TCHP	9606.ENSP00000324404	Trichoplein, keratin filament binding; Tumor suppressor which has the ability to inhibit cell growth and be pro-apoptotic during cell stress. Inhibits cell growth in bladder and prostate cancer cells by a down-regulation of HSPB1 by inhibiting its phosphorylation. May act as a 'capping' or 'branching' protein for keratin filaments in the cell periphery. May regulate K8/K18 filament and desmosome …
Cluster_1	Blue	114	FMN2	9606.ENSP00000318884	Formin 2; Required for asymmetric spindle positioning, asymmetric oocyte division and polar body extrusion during female germ cell meiosis (By similarity). Actin-binding protein that is involved in actin cytoskeleton assembly and reorganization. Acts as an actin nucleation factor and promotes assembly of actin filaments together with SPIRE1 and SPIRE2. Involved in intracellular vesicle transport …
Cluster_1	Blue	114	GMPR	9606.ENSP00000259727	Guanosine monophosphate reductase; Catalyzes the irreversible NADPH-dependent deamination of GMP to IMP. It functions in the conversion of nucleobase, nucleoside and nucleotide derivatives of G to A nucleotides, and in maintaining the intracellular balance of A and G nucleotides
Cluster_1	Blue	114	MKRN1	9606.ENSP00000255977	Makorin ring finger protein 1; E3 ubiquitin ligase catalyzing the covalent attachment of ubiquitin moieties onto substrate proteins. These substrates include FILIP1, p53/TP53, CDKN1A and TERT. Keeps cells alive by suppressing p53/TP53 under normal conditions, but stimulates apoptosis by repressing CDKN1A under stress conditions. Acts as a negative regulator of telomerase. Has negative and positiv…
Cluster_1	Blue	114	TRIB1	9606.ENSP00000312150	Tribbles homolog 1 (Drosophila); Interacts with MAPK kinases and regulates activation of MAP kinases. May not display kinase activity
Cluster_1	Blue	114	PLXNA2	9606.ENSP00000356000	Plexin A2; Coreceptor for SEMA3A and SEMA6A. Necessary for signaling by SEMA6A and class 3 semaphorins and subsequent remodeling of the cytoskeleton. Plays a role in axon guidance, invasive growth and cell migration. Class 3 semaphorins bind to a complex composed of a neuropilin and a plexin. The plexin modulates the affinity of the complex for specific semaphorins, and its cytoplasmic domain is …
Cluster_1	Blue	114	SERPINB9	9606.ENSP00000370074	Serpin peptidase inhibitor, clade B (ovalbumin), member 9; Granzyme B inhibitor
Cluster_1	Blue	114	PTGR1	9606.ENSP00000311572	Prostaglandin reductase 1; Functions as 15-oxo-prostaglandin 13-reductase and acts on 15-oxo-PGE1, 15-oxo-PGE2 and 15-oxo-PGE2-alpha. Has no activity towards PGE1, PGE2 and PGE2-alpha (By similarity). Catalyzes the conversion of leukotriene B4 into its biologically less active metabolite, 12-oxo-leukotriene B4. This is an initial and key step of metabolic inactivation of leukotriene B4
Cluster_1	Blue	114	DPP10	9606.ENSP00000376855	Dipeptidyl-peptidase 10 (non-functional); Promotes cell surface expression of the potassium channel KCND2 (PubMed:15454437). Modulates the activity and gating characteristics of the potassium channel KCND2 (PubMed:15454437). Has no dipeptidyl aminopeptidase activity (PubMed:12662155)
Cluster_1	Blue	114	SEMA5A	9606.ENSP00000371936	Sema domain, seven thrombospondin repeats (type 1 and type 1-like), transmembrane domain (TM) and short cytoplasmic domain, (semaphorin) 5A; Bifunctional axonal guidance cue regulated by sulfated proteoglycans; attractive effects result from interactions with heparan sulfate proteoglycans (HSPGs), while the inhibitory effects depend on interactions with chondroitin sulfate proteoglycans (CSPGs) (…
Cluster_1	Blue	114	SHROOM3	9606.ENSP00000296043	Shroom family member 3; Controls cell shape changes in the neuroepithelium during neural tube closure. Induces apical constriction in epithelial cells by promoting the apical accumulation of F-actin and myosin II, and probably by bundling stress fibers. Induces apicobasal cell elongation by redistributing gamma-tubulin and directing the assembly of robust apicobasal microtubule arrays (By similar…
Cluster_1	Blue	114	TDRD7	9606.ENSP00000347444	Tudor domain containing 7; Component of specific cytoplasmic RNA granules involved in post-transcriptional regulation of specific genes: probably acts by binding to specific mRNAs and regulating their translation. Required for lens transparency during lens development, by regulating translation of genes such as CRYBB3 and HSPB1 in the developing lens. Also required during spermatogenesis
Cluster_1	Blue	114	ST8SIA4	9606.ENSP00000231461	ST8 alpha-N-acetyl-neuraminide alpha-2,8-sialyltransferase 4; Catalyzes the polycondensation of alpha-2,8-linked sialic acid required for the synthesis of polysialic acid (PSA), which is present on the embryonic neural cell adhesion molecule (N-CAM), necessary for plasticity of neural cells
Cluster_1	Blue	114	JAKMIP1	9606.ENSP00000386711	Janus kinase and microtubule interacting protein 1; Associates with microtubules and may play a role in the microtubule-dependent transport of the GABA-B receptor. May play a role in JAK1 signaling and regulate microtubule cytoskeleton rearrangements
Cluster_1	Blue	114	RNF152	9606.ENSP00000316628	Ring finger protein 152; E3 ubiquitin-protein ligase mediating 'Lys-63'-linked polyubiquitination of RRAGA in response to amino acid starvation. Thereby, regulates mTORC1 signaling and plays a role in the cellular response to amino acid availability (PubMed:25936802). Also mediates 'Lys-48'-linked polyubiquitination of target proteins and their subsequent targeting to the proteasome for degradati…
Cluster_1	Blue	114	RGS6	9606.ENSP00000451030	Regulator of G-protein signaling 6; Regulates G protein-coupled receptor signaling cascades. Inhibits signal transduction by increasing the GTPase activity of G protein alpha subunits, thereby driving them into their inactive GDP-bound form. The RGS6/GNB5 dimer enhances GNAO1 GTPase activity (PubMed:10521509)
Cluster_1	Blue	114	H2AFY2	9606.ENSP00000362352	H2A histone family, member Y2; Variant histone H2A which replaces conventional H2A in a subset of nucleosomes where it represses transcription. Nucleosomes wrap and compact DNA into chromatin, limiting DNA accessibility to the cellular machineries which require DNA as a template. Histones thereby play a central role in transcription regulation, DNA repair, DNA replication and chromosomal stabilit…
Cluster_1	Blue	114	KCNK12	9606.ENSP00000327611	Potassium channel, subfamily K, member 12; Probable potassium channel subunit. No channel activity observed in heterologous systems. May need to associate with another protein to form a functional channel (By similarity)
Cluster_1	Blue	114	GREM2	9606.ENSP00000318650	Gremlin 2; Cytokine that inhibits the activity of BMP2 and BMP4 in a dose-dependent manner, and thereby modulates signaling by BMP family members. Contributes to the regulation of embryonic morphogenesis via BMP family members. Antagonizes BMP4-induced suppression of progesterone production in granulosa cells (By similarity)
Cluster_1	Blue	114	MCF2L2	9606.ENSP00000328118	MCF.2 cell line derived transforming sequence-like 2; Probably functions as a guanine nucleotide exchange factor
Cluster_1	Blue	114	ST6GALNAC5	9606.ENSP00000417583	ST6 (alpha-N-acetyl-neuraminyl-2,3-beta-galactosyl-1,3)-N-acetylgalactosaminide alpha-2,6-sialyltransferase 5; Involved in the biosynthesis of ganglioside GD1a from GM1b. It exhibits higher activity with glycolipids than with glycoproteins (By similarity)
Cluster_1	Blue	114	DACT2	9606.ENSP00000355760	Dapper, antagonist of beta-catenin, homolog 2 (Xenopus laevis); Involved in regulation of intracellular signaling pathways during development. Negatively regulates the Nodal signaling pathway, possibly by promoting the lysosomal degradation of Nodal receptors, such as TGFBR1. May be involved in control of the morphogenetic behavior of kidney ureteric bud cells by keeping cells epithelial and rest…
Cluster_1	Blue	114	RYR3	9606.ENSP00000373884	Ryanodine receptor 3; Calcium channel that mediates the release of Ca(2+) from the sarcoplasmic reticulum into the cytoplasm in muscle and thereby plays a role in triggering muscle contraction. May regulate Ca(2+) release by other calcium channels. Calcium channel that mediates Ca(2+)-induced Ca(2+) release from the endoplasmic reticulum in non-muscle cells. Contributes to cellular calcium ion ho…
Cluster_1	Blue	114	INPP4A	9606.ENSP00000074304	Inositol polyphosphate-4-phosphatase, type I, 107kDa; Catalyzes the hydrolysis of the 4-position phosphate of phosphatidylinositol 3,4-bisphosphate, inositol 1,3,4- trisphosphate and inositol 3,4-bisphosphate
Cluster_1	Blue	114	CCDC88C	9606.ENSP00000374507	Coiled-coil domain containing 88C; Negative regulator of the canonical Wnt signaling pathway, acting downstream of DVL to inhibit CTNNB1/Beta-catenin stabilization (By similarity). May also activate the JNK signaling pathway (PubMed:25062847)
Cluster_1	Blue	114	MAML3	9606.ENSP00000421180	Mastermind-like 3 (Drosophila); Acts as a transcriptional coactivator for NOTCH proteins. Has been shown to amplify NOTCH-induced transcription of HES1
Cluster_1	Blue	114	FGF17	9606.ENSP00000352414	Fibroblast growth factor 17; Plays an important role in the regulation of embryonic development and as signaling molecule in the induction and patterning of the embryonic brain. Required for normal brain development
Cluster_1	Blue	114	MID1IP1	9606.ENSP00000338706	MID1 interacting protein 1; Plays a role in the regulation of lipogenesis in liver. Up-regulates ACACA enzyme activity. Required for efficient lipid biosynthesis, including triacylglycerol, diacylglycerol and phospholipid. Involved in stabilization of microtubules (By similarity)
Cluster_1	Blue	114	CFLAR	9606.ENSP00000312455	CASP8 and FADD-like apoptosis regulator; Apoptosis regulator protein which may function as a crucial link between cell survival and cell death pathways in mammalian cells. Acts as an inhibitor of TNFRSF6 mediated apoptosis. A proteolytic fragment (p43) is likely retained in the death-inducing signaling complex (DISC) thereby blocking further recruitment and processing of caspase-8 at the complex.…
Cluster_1	Blue	114	AADAT	9606.ENSP00000226840	Aminoadipate aminotransferase; Transaminase with broad substrate specificity. Has transaminase activity towards aminoadipate, kynurenine, methionine and glutamate. Shows activity also towards tryptophan, aspartate and hydroxykynurenine. Accepts a variety of oxo-acids as amino- group acceptors, with a preference for 2-oxoglutarate, 2- oxocaproic acid, phenylpyruvate and alpha-oxo-gamma-methiol but…
Cluster_1	Blue	114	KLHL4	9606.ENSP00000362206	Kelch-like 4 (Drosophila)
Cluster_1	Blue	114	KCNH8	9606.ENSP00000328813	Potassium voltage-gated channel, subfamily H (eag-related), member 8; Pore-forming (alpha) subunit of voltage-gated potassium channel. Elicits a slowly activating, outward rectifying current. Channel properties may be modulated by cAMP and subunit assembly
Cluster_1	Blue	114	TRIM13	9606.ENSP00000298772	Tripartite motif containing 13; E3 ubiquitin ligase involved in the retrotranslocation and turnover of membrane and secretory proteins from the ER through a set of processes named ER-associated degradation (ERAD). This process acts on misfolded proteins as well as in the regulated degradation of correctly folded proteins. Enhances ionizing radiation-induced p53/TP53 stability and apoptosis via ub…
Cluster_1	Blue	114	SMAD6	9606.ENSP00000288840	SMAD family member 6; Acts as a mediator of TGF-beta and BMP antiflammatory activity. Suppresses IL1R-TLR signaling through its direct interaction with PEL1, preventing NF-kappa-B activation, nuclear transport and NF-kappa-B-mediated expression of proinflammatory genes. May block the BMP-SMAD1 signaling pathway by competing with SMAD4 for receptor-activated SMAD1-binding. Binds to regulatory elem…
Cluster_1	Blue	114	STC1	9606.ENSP00000290271	Stanniocalcin 1; Stimulates renal phosphate reabsorption, and could therefore prevent hypercalcemia
Cluster_1	Blue	114	TNRC18	9606.ENSP00000395538	Trinucleotide repeat containing 18
Cluster_1	Blue	114	COCH	9606.ENSP00000216361	Coagulation factor C homolog, cochlin (Limulus polyphemus); Plays a role in the control of cell shape and motility in the trabecular meshwork
Cluster_1	Blue	114	CLMP	9606.ENSP00000405577	CXADR-like membrane protein; May be involved in the cell-cell adhesion. May play a role in adipocyte differentiation and development of obesity. Is required for normal small intestine development
Cluster_1	Blue	114	EBF2	9606.ENSP00000430241	Early B-cell factor 2; Transcription factor that, in osteoblasts, activates the decoy receptor for RANKL, TNFRSF11B, which in turn regulates osteoclast differentiation. Acts in synergy with the Wnt- responsive LEF1/CTNNB1 pathway. Recognizes variations of the palindromic sequence 5'-ATTCCCNNGGGAATT-3' (By similarity)
Cluster_1	Blue	114	MEX3A	9606.ENSP00000432845	Mex-3 homolog A (C. elegans); RNA binding protein, may be involved in post- transcriptional regulatory mechanisms
Cluster_1	Blue	114	TNFSF14	9606.ENSP00000469049	Tumor necrosis factor (ligand) superfamily, member 14; Cytokine that binds to TNFRSF3/LTBR. Binding to the decoy receptor TNFRSF6B modulates its effects. Activates NFKB, stimulates the proliferation of T-cells, and inhibits growth of the adenocarcinoma HT-29. Acts as a receptor for Herpes simplex virus
Cluster_1	Blue	114	INO80D	9606.ENSP00000384198	INO80 complex subunit D; Putative regulatory component of the chromatin remodeling INO80 complex which is involved in transcriptional regulation, DNA replication and probably DNA repair
Cluster_1	Blue	114	RASSF8	9606.ENSP00000282884	Ras association (RalGDS/AF-6) domain family (N-terminal) member 8
Cluster_1	Blue	114	SORCS1	9606.ENSP00000345964	Sortilin-related VPS10 domain containing receptor 1
Cluster_2	Green	19	EGF	9606.ENSP00000265171	Epidermal growth factor; EGF stimulates the growth of various epidermal and epithelial tissues in vivo and in vitro and of some fibroblasts in cell culture. Magnesiotropic hormone that stimulates magnesium reabsorption in the renal distal convoluted tubule via engagement of EGFR and activation of the magnesium channel TRPM6. Can induce neurite outgrowth in motoneurons of the pond snail Lymnaea st…
Cluster_2	Green	19	BAX	9606.ENSP00000293288	BCL2-associated X protein; Accelerates programmed cell death by binding to, and antagonizing the apoptosis repressor BCL2 or its adenovirus homolog E1B 19k protein. Under stress conditions, undergoes a conformation change that causes translocation to the mitochondrion membrane, leading to the release of cytochrome c that then triggers apoptosis. Promotes activation of CASP3, and thereby apoptosis
Cluster_2	Green	19	ERBB4	9606.ENSP00000342235	V-erb-a erythroblastic leukemia viral oncogene homolog 4 (avian); Tyrosine-protein kinase that plays an essential role as cell surface receptor for neuregulins and EGF family members and regulates development of the heart, the central nervous system and the mammary gland, gene transcription, cell proliferation, differentiation, migration and apoptosis. Required for normal cardiac muscle different…
Cluster_2	Green	19	IGFBP2	9606.ENSP00000233809	Insulin-like growth factor binding protein 2, 36kDa; Inhibits IGF-mediated growth and developmental rates. IGF-binding proteins prolong the half-life of the IGFs and have been shown to either inhibit or stimulate the growth promoting effects of the IGFs on cell culture. They alter the interaction of IGFs with their cell surface receptors
Cluster_2	Green	19	ARRB1	9606.ENSP00000409581	Arrestin, beta 1; Functions in regulating agonist-mediated G-protein coupled receptor (GPCR) signaling by mediating both receptor desensitization and resensitization processes. During homologous desensitization, beta-arrestins bind to the GPRK-phosphorylated receptor and sterically preclude its coupling to the cognate G- protein; the binding appears to require additional receptor determinants exp…
Cluster_2	Green	19	TRIP10	9606.ENSP00000320493	Thyroid hormone receptor interactor 10
Cluster_2	Green	19	TNC	9606.ENSP00000265131	Tenascin C; Extracellular matrix protein implicated in guidance of migrating neurons as well as axons during development, synaptic plasticity as well as neuronal regeneration. Promotes neurite outgrowth from cortical neurons grown on a monolayer of astrocytes. Ligand for integrins alpha-8/beta-1, alpha-9/beta-1, alpha-V/beta-3 and alpha-V/beta-6
Cluster_2	Green	19	FST	9606.ENSP00000256759	Follistatin; Binds directly to activin and functions as an activin antagonist. Specific inhibitor of the biosynthesis and secretion of pituitary follicle stimulating hormone (FSH)
Cluster_2	Green	19	LEFTY2	9606.ENSP00000355785	Left-right determination factor 2; Required for left-right (L-R) asymmetry determination of organ systems in mammals. May play a role in endometrial bleeding
Cluster_2	Green	19	TACR1	9606.ENSP00000303522	Tachykinin receptor 1; This is a receptor for the tachykinin neuropeptide substance P. It is probably associated with G proteins that activate a phosphatidylinositol-calcium second messenger system. The rank order of affinity of this receptor to tachykinins is: substance P > substance K > neuromedin-K
Cluster_2	Green	19	FGF8	9606.ENSP00000321797	Fibroblast growth factor 8 (androgen-induced); Plays an important role in the regulation of embryonic development, cell proliferation, cell differentiation and cell migration. Required for normal brain, eye, ear and limb development during embryogenesis. Required for normal development of the gonadotropin-releasing hormone (GnRH) neuronal system (PubMed:16384934, PubMed:16597617, PubMed:8663044).…
Cluster_2	Green	19	CDH2	9606.ENSP00000269141	Cadherin 2, type 1, N-cadherin (neuronal); Cadherins are calcium-dependent cell adhesion proteins. They preferentially interact with themselves in a homophilic manner in connecting cells; cadherins may thus contribute to the sorting of heterogeneous cell types. Acts as a regulator of neural stem cells quiescence by mediating anchorage of neural stem cells to ependymocytes in the adult subependyma…
Cluster_2	Green	19	FGF13	9606.ENSP00000359635	Fibroblast growth factor 13; Microtubule-binding protein which directly binds tubulin and is involved in both polymerization and stabilization of microtubules. Through its action on microtubules, may participate to the refinement of axons by negatively regulating axonal and leading processes branching. Plays a crucial role in neuron polarization and migration in the cerebral cortex and the hippoc…
Cluster_2	Green	19	VAMP8	9606.ENSP00000263864	Vesicle-associated membrane protein 8; SNAREs, soluble N-ethylmaleimide-sensitive factor- attachment protein receptors, are essential proteins for fusion of cellular membranes. SNAREs localized on opposing membranes assemble to form a trans-SNARE complex, an extended, parallel four alpha-helical bundle that drives membrane fusion. VAMP8 is a SNARE involved in autophagy through the direct control …
Cluster_2	Green	19	KIT	9606.ENSP00000288135	V-kit Hardy-Zuckerman 4 feline sarcoma viral oncogene homolog; Tyrosine-protein kinase that acts as cell-surface receptor for the cytokine KITLG/SCF and plays an essential role in the regulation of cell survival and proliferation, hematopoiesis, stem cell maintenance, gametogenesis, mast cell development, migration and function, and in melanogenesis. In response to KITLG/SCF binding, KIT can acti…
Cluster_2	Green	19	WWOX	9606.ENSP00000457230	WW domain containing oxidoreductase; Putative oxidoreductase. Acts as a tumor suppressor and plays a role in apoptosis. Required for normal bone development (By similarity). May function synergistically with p53/TP53 to control genotoxic stress-induced cell death. Plays a role in TGFB1 signaling and TGFB1-mediated cell death. May also play a role in tumor necrosis factor (TNF)-mediated cell death…
Cluster_2	Green	19	TENM4	9606.ENSP00000278550	Teneurin transmembrane protein 4; Involved in neural development, regulating the establishment of proper connectivity within the nervous system. Plays a role in the establishment of the anterior-posterior axis during gastrulation. Regulates the differentiation and cellular process formation of oligodendrocytes and myelination of small- diameter axons in the central nervous system (CNS). Promotes …
Cluster_2	Green	19	HAS2	9606.ENSP00000306991	Hyaluronan synthase 2; Catalyzes the addition of GlcNAc or GlcUA monosaccharides to the nascent hyaluronan polymer. Therefore, it is essential to hyaluronan synthesis a major component of most extracellular matrices that has a structural role in tissues architectures and regulates cell adhesion, migration and differentiation. This is one of the isozymes catalyzing that reaction and it is particul…
Cluster_2	Green	19	EDA	9606.ENSP00000363680	Ectodysplasin A; Seems to be involved in epithelial-mesenchymal signaling during morphogenesis of ectodermal organs. Isoform 1 binds only to the receptor EDAR, while isoform 3 binds exclusively to the receptor XEDAR
Cluster_3	Red	15	LRIG3	9606.ENSP00000326759	Leucine-rich repeats and immunoglobulin-like domains 3; May play a role in craniofacial and inner ear morphogenesis during embryonic development. May act within the otic vesicle epithelium to control formation of the lateral semicircular canal in the inner ear, possibly by restricting the expression of NTN1 (By similarity)
Cluster_3	Red	15	CXCR4	9606.ENSP00000386884	Chemokine (C-X-C motif) receptor 4; Receptor for the C-X-C chemokine CXCL12/SDF-1 that transduces a signal by increasing intracellular calcium ion levels and enhancing MAPK1/MAPK3 activation. Acts as a receptor for extracellular ubiquitin; leading to enhanced intracellular calcium ions and reduced cellular cAMP levels. Involved in hematopoiesis and in cardiac ventricular septum formation. Also pl…
Cluster_3	Red	15	EDNRB	9606.ENSP00000366416	Endothelin receptor type B; Non-specific receptor for endothelin 1, 2, and 3. Mediates its action by association with G proteins that activate a phosphatidylinositol-calcium second messenger system
Cluster_3	Red	15	NPFFR2	9606.ENSP00000307822	Neuropeptide FF receptor 2; Receptor for NPAF (A-18-F-amide) and NPFF (F-8-F-amide) neuropeptides, also known as morphine-modulating peptides. Can also be activated by a variety of naturally occurring or synthetic FMRF-amide like ligands. This receptor mediates its action by association with G proteins that activate a phosphatidylinositol- calcium second messenger system
Cluster_3	Red	15	MXRA5	9606.ENSP00000217939	Matrix-remodelling associated 5
Cluster_3	Red	15	ITPR3	9606.ENSP00000363435	Inositol 1,4,5-trisphosphate receptor, type 3; Receptor for inositol 1,4,5-trisphosphate, a second messenger that mediates the release of intracellular calcium
Cluster_3	Red	15	FZD5	9606.ENSP00000354607	Frizzled family receptor 5; Receptor for Wnt proteins. Most of frizzled receptors are coupled to the beta-catenin canonical signaling pathway, which leads to the activation of disheveled proteins, inhibition of GSK- 3 kinase, nuclear accumulation of beta-catenin and activation of Wnt target genes. A second signaling pathway involving PKC and calcium fluxes has been seen for some family members, b…
Cluster_3	Red	15	LGR5	9606.ENSP00000266674	Leucine-rich repeat containing G protein-coupled receptor 5; Receptor for R-spondins that potentiates the canonical Wnt signaling pathway and acts as a stem cell marker of the intestinal epithelium and the hair follicle. Upon binding to R- spondins (RSPO1, RSPO2, RSPO3 or RSPO4), associates with phosphorylated LRP6 and frizzled receptors that are activated by extracellular Wnt receptors, triggeri…
Cluster_3	Red	15	GRPR	9606.ENSP00000369643	Gastrin-releasing peptide receptor; Receptor for gastrin releasing peptide (GRP). This receptor mediates its action by association with G proteins that activate a phosphatidylinositol-calcium second messenger system
Cluster_3	Red	15	MAPK10	9606.ENSP00000352157	Mitogen-activated protein kinase 10; Serine/threonine-protein kinase involved in various processes such as neuronal proliferation, differentiation, migration and programmed cell death. Extracellular stimuli such as proinflammatory cytokines or physical stress stimulate the stress- activated protein kinase/c-Jun N-terminal kinase (SAP/JNK) signaling pathway. In this cascade, two dual specificity k…
Cluster_3	Red	15	GNB4	9606.ENSP00000232564	Guanine nucleotide binding protein (G protein), beta polypeptide 4; Guanine nucleotide-binding proteins (G proteins) are involved as a modulator or transducer in various transmembrane signaling systems. The beta and gamma chains are required for the GTPase activity, for replacement of GDP by GTP, and for G protein- effector interaction
Cluster_3	Red	15	CCKBR	9606.ENSP00000335544	Cholecystokinin B receptor; Receptor for gastrin and cholecystokinin. The CKK-B receptors occur throughout the central nervous system where they modulate anxiety, analgesia, arousal, and neuroleptic activity. This receptor mediates its action by association with G proteins that activate a phosphatidylinositol-calcium second messenger system
Cluster_3	Red	15	PREX1	9606.ENSP00000361009	Phosphatidylinositol-3,4,5-trisphosphate-dependent Rac exchange factor 1; Functions as a RAC guanine nucleotide exchange factor (GEF), which activates the Rac proteins by exchanging bound GDP for free GTP. Its activity is synergistically activated by phosphatidylinositol 3,4,5-trisphosphate and the beta gamma subunits of heterotrimeric G protein. May function downstream of heterotrimeric G protei…
Cluster_3	Red	15	GNAL	9606.ENSP00000334051	Guanine nucleotide binding protein (G protein), alpha activating activity polypeptide, olfactory type; Guanine nucleotide-binding proteins (G proteins) are involved as modulators or transducers in various transmembrane signaling systems. G(olf) alpha mediates signal transduction within the olfactory neuroepithelium and the basal ganglia. May be involved in some aspect of visual transduction, and …
Cluster_3	Red	15	KCNJ3	9606.ENSP00000295101	Potassium inwardly-rectifying channel, subfamily J, member 3; This potassium channel is controlled by G proteins. Inward rectifier potassium channels are characterized by a greater tendency to allow potassium to flow into the cell rather than out of it. Their voltage dependence is regulated by the concentration of extracellular potassium; as external potassium is raised, the voltage range of the …
Cluster_4	Yellow	4	ACSM4	9606.ENSP00000382349	acyl-CoA synthetase medium-chain family member 4; Has medium-chain fatty acid:CoA ligase activity with broad substrate specificity (in vitro). Acts on acids from C(4) to C(11) and on the corresponding 3-hydroxy- and 2,3- or 3,4- unsaturated acids (in vitro) (By similarity)
Cluster_4	Yellow	4	ACADSB	9606.ENSP00000357873	acyl-CoA dehydrogenase, short/branched chain; Has greatest activity toward short branched chain acyl- CoA derivative such as (s)-2-methylbutyryl-CoA, isobutyryl-CoA, and 2-methylhexanoyl-CoA as well as toward short straight chain acyl-CoAs such as butyryl-CoA and hexanoyl-CoA. Can use valproyl- CoA as substrate and may play a role in controlling the metabolic flux of valproic acid in the developm…
Cluster_4	Yellow	4	ACOX3	9606.ENSP00000348775	acyl-CoA oxidase 3, pristanoyl; Oxidizes the CoA-esters of 2-methyl-branched fatty acids
Cluster_4	Yellow	4	PRODH	9606.ENSP00000349577	Proline dehydrogenase (oxidase) 1; Converts proline to delta-1-pyrroline-5-carboxylate
Cluster_5	Cyan	3	COL23A1	9606.ENSP00000375069	Collagen, type XXIII, alpha 1
Cluster_5	Cyan	3	COL6A2	9606.ENSP00000300527	Collagen, type VI, alpha 2; Collagen VI acts as a cell-binding protein
Cluster_5	Cyan	3	LEPREL1	9606.ENSP00000316881	Leprecan-like 1; Shows prolyl 3-hydroxylase activity catalyzing the post- translational formation of 3-hydroxyproline in -Xaa-Pro-Gly- sequences in collagens, especially types II, IV and V

## Sheet: STRING-iPSC_DE
#cluster name	cluster color	gene count	protein name	protein identifier	protein description
Cluster_1	Cyan	81	CACNA2D3	9606.ENSP00000419101	Calcium channel, voltage-dependent, alpha 2/delta subunit 3; The alpha-2/delta subunit of voltage-dependent calcium channels regulates calcium current density and activation/inactivation kinetics of the calcium channel. Acts as a regulatory subunit for P/Q-type calcium channel (CACNA1A), N-type (CACNA1B), L-type (CACNA1C OR CACNA1D) but not T-type (CACNA1G) (By similarity)
Cluster_1	Cyan	81	GNGT1	9606.ENSP00000248572	Guanine nucleotide binding protein (G protein), gamma transducing activity polypeptide 1; Guanine nucleotide-binding proteins (G proteins) are involved as a modulator or transducer in various transmembrane signaling systems. The beta and gamma chains are required for the GTPase activity, for replacement of GDP by GTP, and for G protein- effector interaction
Cluster_1	Cyan	81	SEMA3E	9606.ENSP00000303212	Sema domain, immunoglobulin domain (Ig), short basic domain, secreted, (semaphorin) 3E; Plays an important role in signaling via the cell surface receptor PLXND1. Mediates reorganization of the actin cytoskeleton, leading to the retraction of cell projections. Promotes focal adhesion disassembly and inhibits adhesion of endothelial cells to the extracellular matrix. Regulates angiogenesis, both d…
Cluster_1	Cyan	81	LRP8	9606.ENSP00000303634	Low density lipoprotein receptor-related protein 8, apolipoprotein e receptor; Cell surface receptor for Reelin (RELN) and apolipoprotein E (apoE)-containing ligands. LRP8 participates in transmitting the extracellular Reelin signal to intracellular signaling processes, by binding to DAB1 on its cytoplasmic tail. Reelin acts via both the VLDL receptor (VLDLR) and LRP8 to regulate DAB1 tyrosine ph…
Cluster_1	Cyan	81	USP44	9606.ENSP00000258499	Ubiquitin specific peptidase 44; Deubiquitinase that plays a key regulatory role in the spindle assembly checkpoint or mitotic checkpoint by preventing premature anaphase onset. Acts by specifically mediating deubiquitination of CDC20, a negative regulator of the anaphase promoting complex/cyclosome (APC/C). Deubiquitination of CDC20 leads to stabilize the MAD2L1-CDC20-APC/C ternary complex (also…
Cluster_1	Cyan	81	TUBB2A	9606.ENSP00000369703	Tubulin, beta 2A class IIa; Tubulin is the major constituent of microtubules. It binds two moles of GTP, one at an exchangeable site on the beta chain and one at a non-exchangeable site on the alpha chain (By similarity)
Cluster_1	Cyan	81	XK	9606.ENSP00000367879	X-linked Kx blood group (McLeod syndrome); May be involved in sodium-dependent transport of neutral amino acids or oligopeptides
Cluster_1	Cyan	81	FZD7	9606.ENSP00000286201	Frizzled family receptor 7; Receptor for Wnt proteins. Most of frizzled receptors are coupled to the beta-catenin canonical signaling pathway, which leads to the activation of disheveled proteins, inhibition of GSK- 3 kinase, nuclear accumulation of beta-catenin and activation of Wnt target genes. A second signaling pathway involving PKC and calcium fluxes has been seen for some family members, b…
Cluster_1	Cyan	81	GPR98	9606.ENSP00000384582	G protein-coupled receptor 98; Receptor that may have an important role in the development of the central nervous system
Cluster_1	Cyan	81	PSIP1	9606.ENSP00000370109	PC4 and SFRS1 interacting protein 1; Transcriptional coactivator involved in neuroepithelial stem cell differentiation and neurogenesis. Involved in particular in lens epithelial cell gene regulation and stress responses. May play an important role in lens epithelial to fiber cell terminal differentiation. May play a protective role during stress-induced apoptosis. Isoform 2 is a more general and…
Cluster_1	Cyan	81	LRRTM4	9606.ENSP00000386357	Leucine rich repeat transmembrane neuronal 4; May play a role in the development and maintenance of the vertebrate nervous system. Exhibits strong synaptogenic activity, restricted to excitatory presynaptic differentiation (By similarity)
Cluster_1	Cyan	81	SEPHS1	9606.ENSP00000367893	Selenophosphate synthetase 1; Synthesizes selenophosphate from selenide and ATP
Cluster_1	Cyan	81	KAL1	9606.ENSP00000262648	Kallmann syndrome 1 sequence; Has a dual branch-promoting and guidance activity, which may play an important role in the patterning of mitral and tufted cell collaterals to the olfactory cortex (By similarity). Chemoattractant for fetal olfactory epithelial cells
Cluster_1	Cyan	81	RIMS2	9606.ENSP00000384892	Regulating synaptic membrane exocytosis 2
Cluster_1	Cyan	81	PCDH1	9606.ENSP00000287008	Protocadherin 1; May be involved in cell-cell interaction processes and in cell adhesion
Cluster_1	Cyan	81	POLR3G	9606.ENSP00000382058	Polymerase (RNA) III (DNA directed) polypeptide G (32kD); DNA-dependent RNA polymerase catalyzes the transcription of DNA into RNA using the four ribonucleoside triphosphates as substrates. Specific peripheric component of RNA polymerase III which synthesizes small RNAs, such as 5S rRNA and tRNAs. May direct with other members of the RPC3/POLR3C-RPC6/POLR3F- RPC7/POLR3G subcomplex RNA Pol III bin…
Cluster_1	Cyan	81	ZNF730	9606.ENSP00000329365	Zinc finger protein 730; May be involved in transcriptional regulation
Cluster_1	Cyan	81	SYT1	9606.ENSP00000261205	Synaptotagmin I; May have a regulatory role in the membrane interactions during trafficking of synaptic vesicles at the active zone of the synapse. It binds acidic phospholipids with a specificity that requires the presence of both an acidic head group and a diacyl backbone. A Ca(2+)-dependent interaction between synaptotagmin and putative receptors for activated protein kinase C has also been re…
Cluster_1	Cyan	81	ZNF788	9606.ENSP00000473243	Zinc finger family member 788
Cluster_1	Cyan	81	LAPTM4B	9606.ENSP00000402301	Lysosomal protein transmembrane 4 beta
Cluster_1	Cyan	81	NFE2L3	9606.ENSP00000056233	Nuclear factor (erythroid-derived 2)-like 3; Activates erythroid-specific, globin gene expression
Cluster_1	Cyan	81	UST	9606.ENSP00000356433	Uronyl-2-sulfotransferase; Sulfotransferase that catalyzes the transfer of sulfate to the position 2 of uronyl residues. Has mainly activity toward iduronyl residues in dermatan sulfate, and weaker activity toward glucuronyl residues of chondroitin sulfate. Has no activity toward desulfated N-resulfated heparin
Cluster_1	Cyan	81	MYEF2	9606.ENSP00000316950	Myelin expression factor 2; Transcriptional repressor of the myelin basic protein gene (MBP). Binds to the proximal MB1 element 5'-TTGTCC-3' of the MBP promoter. Its binding to MB1 and function are inhibited by PURA (By similarity)
Cluster_1	Cyan	81	SS18L2	9606.ENSP00000011691	Synovial sarcoma translocation gene on chromosome 18-like 2
Cluster_1	Cyan	81	MDN1	9606.ENSP00000358400	MDN1, midasin homolog (yeast); Nuclear chaperone required for maturation and nuclear export of pre-60S ribosome subunits
Cluster_1	Cyan	81	UCHL1	9606.ENSP00000284440	Ubiquitin carboxyl-terminal esterase L1 (ubiquitin thiolesterase); Ubiquitin-protein hydrolase involved both in the processing of ubiquitin precursors and of ubiquitinated proteins. This enzyme is a thiol protease that recognizes and hydrolyzes a peptide bond at the C-terminal glycine of ubiquitin. Also binds to free monoubiquitin and may prevent its degradation in lysosomes. The homodimer may ha…
Cluster_1	Cyan	81	CRMP1	9606.ENSP00000321606	Collapsin response mediator protein 1; Necessary for signaling by class 3 semaphorins and subsequent remodeling of the cytoskeleton. Plays a role in axon guidance, invasive growth and cell migration. May participate in cytokinesis
Cluster_1	Cyan	81	VASH2	9606.ENSP00000355932	Vasohibin 2
Cluster_1	Cyan	81	HPGDS	9606.ENSP00000295256	Hematopoietic prostaglandin D synthase; Bifunctional enzyme which catalyzes both the conversion of PGH2 to PGD2, a prostaglandin involved in smooth muscle contraction/relaxation and a potent inhibitor of platelet aggregation, and the conjugation of glutathione with a wide range of aryl halides and organic isothiocyanates. Also exhibits low glutathione-peroxidase activity towards cumene hydroperox…
Cluster_1	Cyan	81	GPR176	9606.ENSP00000453076	G protein-coupled receptor 176; Orphan receptor
Cluster_1	Cyan	81	PCDH11X	9606.ENSP00000362186	Protocadherin 11 X-linked; Potential calcium-dependent cell-adhesion protein
Cluster_1	Cyan	81	PREX2	9606.ENSP00000288368	Phosphatidylinositol-3,4,5-trisphosphate-dependent Rac exchange factor 2; Functions as a RAC1 guanine nucleotide exchange factor (GEF), activating Rac proteins by exchanging bound GDP for free GTP. Its activity is synergistically activated by phosphatidylinositol 3,4,5-trisphosphate and the beta gamma subunits of heterotrimeric G protein. Mediates the activation of RAC1 in a PI3K-dependent manner…
Cluster_1	Cyan	81	RFWD3	9606.ENSP00000354361	Ring finger and WD repeat domain 3; E3 ubiquitin-protein ligase that mediates the ubiquitination of p53/TP53 in the late response to DNA damage, and acts as a positive regulator of p53/TP53 stability, thereby regulating the G1/S DNA damage checkpoint. May act by catalyzing the formation of short polyubiquitin chains on p53/TP53 that are not targeted to the proteasome. In response to ionizing radi…
Cluster_1	Cyan	81	SFRP2	9606.ENSP00000274063	Secreted frizzled-related protein 2; Soluble frizzled-related proteins (sFRPS) function as modulators of Wnt signaling through direct interaction with Wnts. They have a role in regulating cell growth and differentiation in specific cell types. SFRP2 may be important for eye retinal development and for myogenesis
Cluster_1	Cyan	81	ABHD12B	9606.ENSP00000336693	Abhydrolase domain containing 12B
Cluster_1	Cyan	81	CD200	9606.ENSP00000420298	CD200 molecule; Costimulates T-cell proliferation. May regulate myeloid cell activity in a variety of tissues
Cluster_1	Cyan	81	AASS	9606.ENSP00000377040	Aminoadipate-semialdehyde synthase; Bifunctional enzyme that catalyzes the first two steps in lysine degradation. The N-terminal and the C-terminal contain lysine-ketoglutarate reductase and saccharopine dehydrogenase activity, respectively
Cluster_1	Cyan	81	IL17RD	9606.ENSP00000296318	Interleukin 17 receptor D; Feedback inhibitor of fibroblast growth factor mediated Ras-MAPK signaling and ERK activation. May inhibit FGF-induced FGFR1 tyrosine phosphorylation. Regulates the nuclear ERK signaling pathway by spatially blocking nuclear translocation of activated ERK without inhibiting cytoplasmic phosphorylation of ERK. Mediates JNK activation and may be involved in apoptosis. Mig…
Cluster_1	Cyan	81	ANK2	9606.ENSP00000349588	Ankyrin 2, neuronal; In skeletal muscle, required for proper localization of DMD and DCTN4 and for the formation and/or stability of a special subset of microtubules associated with costameres and neuromuscular junctions (By similarity). Attaches integral membrane proteins to cytoskeletal elements. Also binds to cytoskeletal proteins. Required for coordinate assembly of Na/Ca exchanger, Na/K ATPa…
Cluster_1	Cyan	81	KIF5C	9606.ENSP00000393379	Kinesin family member 5C; Mediates dendritic trafficking of mRNAs (By similarity). Kinesin is a microtubule-associated force-producing protein that may play a role in organelle transport
Cluster_1	Cyan	81	TMEM132B	9606.ENSP00000299308	Transmembrane protein 132B
Cluster_1	Cyan	81	TERF1	9606.ENSP00000276603	Telomeric repeat binding factor (NIMA-interacting) 1; Binds the telomeric double-stranded 5'-TTAGGG-3' repeat and negatively regulates telomere length. Involved in the regulation of the mitotic spindle. Component of the shelterin complex (telosome) that is involved in the regulation of telomere length and protection. Shelterin associates with arrays of double- stranded 5'-TTAGGG-3' repeats added …
Cluster_1	Cyan	81	CALB1	9606.ENSP00000265431	Calbindin 1, 28kDa; Buffers cytosolic calcium. May stimulate a membrane Ca(2+)-ATPase and a 3',5'-cyclic nucleotide phosphodiesterase
Cluster_1	Cyan	81	SLC39A10	9606.ENSP00000352655	Solute carrier family 39 (zinc transporter), member 10; May act as a zinc-influx transporter
Cluster_1	Cyan	81	PMAIP1	9606.ENSP00000326119	Phorbol-12-myristate-13-acetate-induced protein 1; Promotes activation of caspases and apoptosis. Promotes mitochondrial membrane changes and efflux of apoptogenic proteins from the mitochondria. Contributes to p53/TP53-dependent apoptosis after radiation exposure. Promotes proteasomal degradation of MCL1. Competes with BAK1 for binding to MCL1 and can displace BAK1 from its binding site on MCL1 …
Cluster_1	Cyan	81	RNF125	9606.ENSP00000217740	Ring finger protein 125, E3 ubiquitin protein ligase; E3 ubiquitin-protein ligase that acts as a positive regulator of T-cell activation. E3 ligase proteins mediate ubiquitination and subsequent proteasomal degradation of target proteins
Cluster_1	Cyan	81	IL34	9606.ENSP00000288098	Interleukin 34; Cytokine that promotes the proliferation, survival and differentiation of monocytes and macrophages. Promotes the release of proinflammatory chemokines, and thereby plays an important role in innate immunity and in inflammatory processes. Plays an important role in the regulation of osteoclast proliferation and differentiation, and in the regulation of bone resorption. Signaling v…
Cluster_1	Cyan	81	ADD2	9606.ENSP00000264436	Adducin 2 (beta); Membrane-cytoskeleton-associated protein that promotes the assembly of the spectrin-actin network. Binds to the erythrocyte membrane receptor SLC2A1/GLUT1 and may therefore provide a link between the spectrin cytoskeleton to the plasma membrane. Binds to calmodulin. Calmodulin binds preferentially to the beta subunit
Cluster_1	Cyan	81	TEAD2	9606.ENSP00000310701	TEA domain family member 2; Transcription factor which plays a key role in the Hippo signaling pathway, a pathway involved in organ size control and tumor suppression by restricting proliferation and promoting apoptosis. The core of this pathway is composed of a kinase cascade wherein MST1/MST2, in complex with its regulatory protein SAV1, phosphorylates and activates LATS1/2 in complex with its …
Cluster_1	Cyan	81	TUBB2B	9606.ENSP00000259818	Tubulin, beta 2B class IIb; Tubulin is the major constituent of microtubules. It binds two moles of GTP, one at an exchangeable site on the beta chain and one at a non-exchangeable site on the alpha chain (By similarity). TUBB2B is implicated in neuronal migration
Cluster_1	Cyan	81	UNC5D	9606.ENSP00000385143	Unc-5 homolog D (C. elegans); Receptor for the netrin NTN4 that promotes neuronal cell survival (By similarity). Plays a role in cell-cell adhesion and cell guidance. Receptor for netrin involved in cell migration. Plays a role in axon guidance by mediating axon repulsion of neuronal growth cones in the developing nervous system upon ligand binding (By similarity). May play a role in apoptosis in…
Cluster_1	Cyan	81	FAM124A	9606.ENSP00000280057	Family with sequence similarity 124A
Cluster_1	Cyan	81	PODXL	9606.ENSP00000367817	Podocalyxin-like; Involved in the regulation of both adhesion and cell morphology and cancer progression. Function as an anti-adhesive molecule that maintains an open filtration pathway between neighboring foot processes in the podocyte by charge repulsion. Acts as a pro-adhesive molecule, enhancing the adherence of cells to immobilized ligands, increasing the rate of migration and cell- cell con…
Cluster_1	Cyan	81	C12orf45	9606.ENSP00000447057	Chromosome 12 open reading frame 45
Cluster_1	Cyan	81	POU5F1B	9606.ENSP00000375557	POU class 5 homeobox 1B; Shows weak transcriptional activator activity
Cluster_1	Cyan	81	GPC4	9606.ENSP00000359864	Glypican 4; Cell surface proteoglycan that bears heparan sulfate. May be involved in the development of kidney tubules and of the central nervous system (By similarity)
Cluster_1	Cyan	81	ZNF483	9606.ENSP00000311679	Zinc finger protein 483; May be involved in transcriptional regulation
Cluster_1	Cyan	81	MTHFD1	9606.ENSP00000450560	Methylenetetrahydrofolate dehydrogenase (NADP+ dependent) 1, methenyltetrahydrofolate cyclohydrolase, formyltetrahydrofolate synthetase
Cluster_1	Cyan	81	HMGA1	9606.ENSP00000308227	High mobility group AT-hook 1; HMG-I/Y bind preferentially to the minor groove of A+T rich regions in double-stranded DNA. It is suggested that these proteins could function in nucleosome phasing and in the 3'-end processing of mRNA transcripts. They are also involved in the transcription regulation of genes containing, or in close proximity to A+T-rich regions
Cluster_1	Cyan	81	TTF2	9606.ENSP00000358478	Transcription termination factor, RNA polymerase II; DsDNA-dependent ATPase which acts as a transcription termination factor by coupling ATP hydrolysis with removal of RNA polymerase II from the DNA template. May contribute to mitotic transcription repression. May also be involved in pre-mRNA splicing
Cluster_1	Cyan	81	FAAH2	9606.ENSP00000364035	Fatty acid amide hydrolase 2; Degrades bioactive fatty acid amides like oleamide, the endogenous cannabinoid, anandamide and myristic amide to their corresponding acids, thereby serving to terminate the signaling functions of these molecules. Hydrolyzes monounsaturated substrate anandamide preferentially as compared to polyunsaturated substrates
Cluster_1	Cyan	81	SCGB3A2	9606.ENSP00000296694	Secretoglobin, family 3A, member 2
Cluster_1	Cyan	81	ADCY2	9606.ENSP00000342952	Adenylate cyclase 2 (brain); Catalyzes the formation of the signaling molecule cAMP in response to G-protein signaling (PubMed:15385642). Down-stream signaling cascades mediate changes in gene expression patterns and lead to increased IL6 production. Functions in signaling cascades downstream of the muscarinic acetylcholine receptors (By similarity)
Cluster_1	Cyan	81	STOX2	9606.ENSP00000311257	Storkhead box 2
Cluster_1	Cyan	81	SEMA6A	9606.ENSP00000345512	Sema domain, transmembrane domain (TM), and cytoplasmic domain, (semaphorin) 6A; Cell surface receptor for PLXNA2 that plays an important role in cell-cell signaling. Required for normal granule cell migration in the developing cerebellum. Promotes reorganization of the actin cytoskeleton and plays an important role in axon guidance in the developing central nervous system. Can act as repulsive a…
Cluster_1	Cyan	81	PPP2R2B	9606.ENSP00000336591	Protein phosphatase 2, regulatory subunit B, beta; The B regulatory subunit might modulate substrate selectivity and catalytic activity, and also might direct the localization of the catalytic enzyme to a particular subcellular compartment. Within the PP2A holoenzyme complex, isoform 2 is required to promote proapoptotic activity (By similarity). Isoform 2 regulates neuronal survival through the …
Cluster_1	Cyan	81	ITGB5	9606.ENSP00000296181	Integrin, beta 5; Integrin alpha-V/beta-5 (ITGAV:ITGB5) is a receptor for fibronectin. It recognizes the sequence R-G-D in its ligand
Cluster_1	Cyan	81	HIST1H2BN	9606.ENSP00000380177	Histone cluster 1, H2bn; Core component of nucleosome. Nucleosomes wrap and compact DNA into chromatin, limiting DNA accessibility to the cellular machineries which require DNA as a template. Histones thereby play a central role in transcription regulation, DNA repair, DNA replication and chromosomal stability. DNA accessibility is regulated via a complex set of post-translational modifications o…
Cluster_1	Cyan	81	TRDN	9606.ENSP00000381240	Triadin; Contributes to the regulation of lumenal Ca2+ release via the sarcoplasmic reticulum calcium release channels RYR1 and RYR2, a key step in triggering skeletal and heart muscle contraction. Required for normal organization of the triad junction, where T-tubules and the sarcoplasmic reticulum terminal cisternae are in close contact (By similarity). Required for normal skeletal muscle stren…
Cluster_1	Cyan	81	HMGB3	9606.ENSP00000359393	High mobility group box 3; Multifunctional protein with various roles in different cellular compartments. May act in a redox sensitive manner. Associates with chromatin and binds DNA with a preference to non- canonical DNA structures such as single-stranded DNA. Can bent DNA and enhance DNA flexibility by looping thus providing a mechanism to promote activities on various gene promoters (By simil…
Cluster_1	Cyan	81	LRRN1	9606.ENSP00000314901	Leucine rich repeat neuronal 1
Cluster_1	Cyan	81	PTPRZ1	9606.ENSP00000377047	Protein tyrosine phosphatase, receptor-type, Z polypeptide 1; Protein tyrosine phosphatase that negatively regulates oligodendrocyte precursor proliferation in the embryonic spinal cord. Required for normal differentiation of the precursor cells into mature, fully myelinating oligodendrocytes. May play a role in protecting oligondendrocytes against apoptosis. May play a role in the establishment …
Cluster_1	Cyan	81	PRKG1	9606.ENSP00000363092	Protein kinase, cGMP-dependent, type I
Cluster_1	Cyan	81	KIAA0825	9606.ENSP00000331385	KIAA0825
Cluster_1	Cyan	81	TRIM71	9606.ENSP00000373272	Tripartite motif containing 71, E3 ubiquitin protein ligase; E3 ubiquitin-protein ligase that cooperates with the microRNAs (miRNAs) machinery and promotes embryonic stem cells proliferation and maintenance. Binds to miRNAs and associates with AGO2, participating in post-transcriptional repression of transcripts such as CDKN1A. Facilitates the G1-S transition to promote rapid embryonic stem cell …
Cluster_1	Cyan	81	SPRY4	9606.ENSP00000344967	Sprouty homolog 4 (Drosophila); Suppresses the insulin receptor and EGFR-transduced MAPK signaling pathway, but does not inhibit MAPK activation by a constitutively active mutant Ras. Probably impairs the formation of GTP-Ras. Inhibits Ras-independent, but not Ras-dependent, activation of RAF1
Cluster_1	Cyan	81	ETV1	9606.ENSP00000385551	Ets variant 1; Transcriptional activator that binds to DNA sequences containing the consensus pentanucleotide 5'-CGGA[AT]-3'
Cluster_1	Cyan	81	C4orf51	9606.ENSP00000391404	Chromosome 4 open reading frame 51
Cluster_1	Cyan	81	GRID2	9606.ENSP00000282020	Glutamate receptor, ionotropic, delta 2; Receptor for glutamate. L-glutamate acts as an excitatory neurotransmitter at many synapses in the central nervous system. The postsynaptic actions of Glu are mediated by a variety of receptors that are named according to their selective agonists
Cluster_1	Cyan	81	SCG3	9606.ENSP00000220478	Secretogranin III
Cluster_1	Cyan	81	C16orf88	9606.ENSP00000219837	Chromosome 16 open reading frame 88
Cluster_2	Blue	13	MCM3	9606.ENSP00000229854	Minichromosome maintenance complex component 3; Acts as component of the MCM2-7 complex (MCM complex) which is the putative replicative helicase essential for 'once per cell cycle' DNA replication initiation and elongation in eukaryotic cells. The active ATPase sites in the MCM2-7 ring are formed through the interaction surfaces of two neighboring subunits such that a critical structure of a cons…
Cluster_2	Blue	13	MCM6	9606.ENSP00000264156	Minichromosome maintenance complex component 6; Acts as component of the MCM2-7 complex (MCM complex) which is the putative replicative helicase essential for 'once per cell cycle' DNA replication initiation and elongation in eukaryotic cells. The active ATPase sites in the MCM2-7 ring are formed through the interaction surfaces of two neighboring subunits such that a critical structure of a cons…
Cluster_2	Blue	13	CDC45	9606.ENSP00000405726	Cell division cycle 45 homolog (S. cerevisiae)
Cluster_2	Blue	13	CHEK2	9606.ENSP00000372023	Checkpoint kinase 2
Cluster_2	Blue	13	CDC6	9606.ENSP00000209728	Cell division cycle 6 homolog (S. cerevisiae); Involved in the initiation of DNA replication. Also participates in checkpoint controls that ensure DNA replication is completed before mitosis is initiated
Cluster_2	Blue	13	PARP1	9606.ENSP00000355759	Poly (ADP-ribose) polymerase 1; Involved in the base excision repair (BER) pathway, by catalyzing the poly(ADP-ribosyl)ation of a limited number of acceptor proteins involved in chromatin architecture and in DNA metabolism. This modification follows DNA damages and appears as an obligatory step in a detection/signaling pathway leading to the reparation of DNA strand breaks. Mediates the poly(ADP-…
Cluster_2	Blue	13	MCM2	9606.ENSP00000265056	Minichromosome maintenance complex component 2; Acts as component of the MCM2-7 complex (MCM complex) which is the putative replicative helicase essential for 'once per cell cycle' DNA replication initiation and elongation in eukaryotic cells. The active ATPase sites in the MCM2-7 ring are formed through the interaction surfaces of two neighboring subunits such that a critical structure of a cons…
Cluster_2	Blue	13	MCM4	9606.ENSP00000262105	Minichromosome maintenance complex component 4; Acts as component of the MCM2-7 complex (MCM complex) which is the putative replicative helicase essential for 'once per cell cycle' DNA replication initiation and elongation in eukaryotic cells. The active ATPase sites in the MCM2-7 ring are formed through the interaction surfaces of two neighboring subunits such that a critical structure of a cons…
Cluster_2	Blue	13	CLSPN	9606.ENSP00000312995	Claspin; Required for checkpoint mediated cell cycle arrest in response to inhibition of DNA replication or to DNA damage induced by both ionizing and UV irradiation. Adapter protein which binds to BRCA1 and the checkpoint kinase CHEK1 and facilitates the ATR- dependent phosphorylation of both proteins. Can also bind specifically to branched DNA structures and may associate with S- phase chromati…
Cluster_2	Blue	13	PUS7	9606.ENSP00000348722	Pseudouridylate synthase 7 homolog (S. cerevisiae)
Cluster_2	Blue	13	CHAF1A	9606.ENSP00000301280	Chromatin assembly factor 1, subunit A (p150); Core component of the CAF-1 complex, a complex thought to mediate chromatin assembly in DNA replication and DNA repair. Assembles histone octamers onto replicating DNA in vitro. CAF-1 performs the first step of the nucleosome assembly process, bringing newly synthesized histones H3 and H4 to replicating DNA; histones H2A/H2B can bind to this chromati…
Cluster_2	Blue	13	RFC3	9606.ENSP00000369411	Replication factor C (activator 1) 3, 38kDa; The elongation of primed DNA templates by DNA polymerase delta and epsilon requires the action of the accessory proteins proliferating cell nuclear antigen (PCNA) and activator 1
Cluster_2	Blue	13	MSH2	9606.ENSP00000233146	mutS homolog 2, colon cancer, nonpolyposis type 1 (E. coli); Component of the post-replicative DNA mismatch repair system (MMR). Forms two different heterodimers: MutS alpha (MSH2- MSH6 heterodimer) and MutS beta (MSH2-MSH3 heterodimer) which binds to DNA mismatches thereby initiating DNA repair. When bound, heterodimers bend the DNA helix and shields approximately 20 base pairs. MutS alpha recog…
Cluster_3	Green	13	SALL4	9606.ENSP00000217086	Sal-like 4 (Drosophila); Transcription factor with a key role in the maintenance and self-renewal of embryonic and hematopoietic stem cells
Cluster_3	Green	13	OTX2	9606.ENSP00000343819	Orthodenticle homeobox 2; Probably plays a role in the development of the brain and the sense organs. Can bind to the BCD target sequence (BTS): 5'-TCTAATCCC-3'
Cluster_3	Green	13	PRDM14	9606.ENSP00000276594	PR domain containing 14; Transcription factor that has both positive and negative roles on transcription. Required for the maintenance of emryonic stem cell identity and the reacquisition of pluripotency in somatic cells. May play an essential role in germ cell development at 2 levels: the reacquisition of potential pluripotency, including SOX2 up-regulation, and successful epigenetic reprogrammi…
Cluster_3	Green	13	ZSCAN10	9606.ENSP00000252463	Zinc finger and SCAN domain containing 10; Embryonic stem (ES) cell-specific transcription factor required to maintain ES cell pluripotency. Can both activate and /or repress expression of target genes, depending on the context. Specifically binds the 5'-[GA]CGCNNGCG[CT]-3' DNA consensus sequence. Regulates expression of POU5F1/OCT4, ZSCAN4 and ALYREF/THOC4 (By similarity)
Cluster_3	Green	13	TDGF1	9606.ENSP00000296145	Teratocarcinoma-derived growth factor 1; Could play a role in the determination of the epiblastic cells that subsequently give rise to the mesoderm
Cluster_3	Green	13	LIN28A	9606.ENSP00000254231	Lin-28 homolog A (C. elegans); 'Translational enhancer' that drives specific mRNAs to polysomes and increases the efficiency of protein synthesis. Its association with the translational machinery and target mRNAs results in an increased number of initiation events per molecule of mRNA and, indirectly, in mRNA stabilization. Binds IGF2 mRNA, MYOD1 mRNA, ARBP/36B4 ribosomal protein mRNA and its own…
Cluster_3	Green	13	DNMT3B	9606.ENSP00000328547	DNA (cytosine-5-)-methyltransferase 3 beta; Required for genome-wide de novo methylation and is essential for the establishment of DNA methylation patterns during development. DNA methylation is coordinated with methylation of histones. May preferentially methylates nucleosomal DNA within the nucleosome core region. May function as transcriptional co- repressor by associating with CBX4 and indepe…
Cluster_3	Green	13	POU5F1	9606.ENSP00000259915	POU class 5 homeobox 1; Transcription factor that binds to the octamer motif (5'-ATTTGCAT-3'). Forms a trimeric complex with SOX2 on DNA and controls the expression of a number of genes involved in embryonic development such as YES1, FGF4, UTF1 and ZFP206. Critical for early embryogenesis and for embryonic stem cell pluripotency
Cluster_3	Green	13	NANOG	9606.ENSP00000229307	Nanog homeobox; Transcription regulator involved in inner cell mass and embryonic stem (ES) cells proliferation and self-renewal. Imposes pluripotency on ES cells and prevents their differentiation towards extraembryonic endoderm and trophectoderm lineages. Blocks bone morphogenetic protein-induced mesoderm differentiation of ES cells by physically interacting with SMAD1 and interfering with the …
Cluster_3	Green	13	L1TD1	9606.ENSP00000419901	LINE-1 type transposase domain containing 1
Cluster_3	Green	13	NODAL	9606.ENSP00000287139	Nodal homolog (mouse); Essential for mesoderm formation and axial patterning during embryonic development
Cluster_3	Green	13	DPPA4	9606.ENSP00000335306	Developmental pluripotency associated 4; May be involved in the maintenance of active epigenetic status of target genes. May inhibit differentiation of embryonic cells into a primitive ectoderm lineage
Cluster_3	Green	13	FGF2	9606.ENSP00000264498	Fibroblast growth factor 2 (basic); Plays an important role in the regulation of cell survival, cell division, angiogenesis, cell differentiation and cell migration. Functions as potent mitogen in vitro
Cluster_4	Yellow	12	RCC2	9606.ENSP00000364582	Regulator of chromosome condensation 2; Required for completion of mitosis and cytokinesis. May function as a guanine nucleotide exchange factor for the small GTPase RAC1
Cluster_4	Yellow	12	BUB1B	9606.ENSP00000287598	Budding uninhibited by benzimidazoles 1 homolog beta (yeast); Essential component of the mitotic checkpoint. Required for normal mitosis progression. The mitotic checkpoint delays anaphase until all chromosomes are properly attached to the mitotic spindle. One of its checkpoint functions is to inhibit the activity of the anaphase-promoting complex/cyclosome (APC/C) by blocking the binding of CDC2…
Cluster_4	Yellow	12	DLGAP5	9606.ENSP00000247191	Discs, large (Drosophila) homolog-associated protein 5; Potential cell cycle regulator that may play a role in carcinogenesis of cancer cells. Mitotic phosphoprotein regulated by the ubiquitin-proteasome pathway. Key regulator of adherens junction integrity and differentiation that may be involved in CDH1-mediated adhesion and signaling in epithelial cells
Cluster_4	Yellow	12	ERCC6L	9606.ENSP00000334675	Excision repair cross-complementing rodent repair deficiency, complementation group 6-like; DNA helicase that acts as an essential component of the spindle assembly checkpoint. Contributes to the mitotic checkpoint by recruiting MAD2 to kinetochores and monitoring tension on centromeric chromatin. Acts as a tension sensor that associates with catenated DNA which is stretched under tension until i…
Cluster_4	Yellow	12	MKI67	9606.ENSP00000357643	Antigen identified by monoclonal antibody Ki-67; Thought to be required for maintaining cell proliferation
Cluster_4	Yellow	12	SKA3	9606.ENSP00000319417	Spindle and kinetochore associated complex subunit 3; Component of the SKA1 complex, a microtubule-binding subcomplex of the outer kinetochore that is essential for proper chromosome segregation (PubMed:19289083, PubMed:19360002, PubMed:23085020). The SKA1 complex is a direct component of the kinetochore-microtubule interface and directly associates with microtubules as oligomeric assemblies (Pub…
Cluster_4	Yellow	12	LMNB1	9606.ENSP00000261366	Lamin B1; Lamins are components of the nuclear lamina, a fibrous layer on the nucleoplasmic side of the inner nuclear membrane, which is thought to provide a framework for the nuclear envelope and may also interact with chromatin
Cluster_4	Yellow	12	HELLS	9606.ENSP00000239027	Helicase, lymphoid-specific; Plays an essential role in normal development and survival. Involved in regulation of the expansion or survival of lymphoid cells. Required for de novo or maintenance DNA methylation. May control silencing of the imprinted CDKN1C gene through DNA methylation. May play a role in formation and organization of heterochromatin, implying a functional role in the regulation…
Cluster_4	Yellow	12	ARHGAP11A	9606.ENSP00000355090	Rho GTPase activating protein 11A
Cluster_4	Yellow	12	ASPM	9606.ENSP00000356379	Asp (abnormal spindle) homolog, microcephaly associated (Drosophila); Probable role in mitotic spindle regulation and coordination of mitotic processes. May have a preferential role in regulating neurogenesis
Cluster_4	Yellow	12	CDCA7	9606.ENSP00000306968	Cell division cycle associated 7; Participates in MYC-mediated cell transformation and apoptosis; induces anchorage-independent growth and clonogenicity in lymphoblastoid cells. Insufficient to induce tumorigenicity when overexpressed but contributes to MYC-mediated tumorigenesis. May play a role as transcriptional regulator
Cluster_4	Yellow	12	PHC1	9606.ENSP00000251757	Polyhomeotic homolog 1 (Drosophila); Component of a Polycomb group (PcG) multiprotein PRC1- like complex, a complex class required to maintain the transcriptionally repressive state of many genes, including Hox genes, throughout development. PcG PRC1 complex acts via chromatin remodeling and modification of histones; it mediates monoubiquitination of histone H2A 'Lys-119', rendering chromatin her…
Cluster_5	Red	5	CNTNAP2	9606.ENSP00000354778	Contactin associated protein-like 2; May play a role in the formation of functional distinct domains critical for saltatory conduction of nerve impulses in myelinated nerve fibers. Seems to demarcate the juxtaparanodal region of the axo-glial junction (By similarity)
Cluster_5	Red	5	NLGN1	9606.ENSP00000354541	Neuroligin 1; Cell surface protein involved in cell-cell-interactions via its interactions with neurexin family members. Plays a role in synapse function and synaptic signal transmission, and probably mediates its effects by recruiting and clustering other synaptic proteins. May promote the initial formation of synapses, but is not essential for this. In vitro, triggers the de novo formation of p…
Cluster_5	Red	5	DLGAP1	9606.ENSP00000316377	Discs, large (Drosophila) homolog-associated protein 1; Part of the postsynaptic scaffold in neuronal cells
Cluster_5	Red	5	NLGN4X	9606.ENSP00000275857	Neuroligin 4, X-linked; Putative neuronal cell surface protein involved in cell- cell-interactions
Cluster_5	Red	5	GABRB3	9606.ENSP00000299267	Gamma-aminobutyric acid (GABA) A receptor, beta 3; Component of the heteropentameric receptor for GABA, the major inhibitory neurotransmitter in the vertebrate brain. Functions also as histamine receptor and mediates cellular responses to histamine. Functions as receptor for diazepines and various anesthetics, such as pentobarbital; these are bound at a separate allosteric effector binding site. …

## Sheet: STRING_HE
#cluster name	cluster color	gene count	protein name	protein identifier	protein description
Cluster_1	Dark Cyan	180	CLSTN3	9606.ENSP00000266546	Calsyntenin 3; May modulate calcium-mediated postsynaptic signals. Complex formation with APBA2 and APP, stabilizes APP metabolism and enhances APBA2-mediated suppression of beta-APP40 secretion, due to the retardation of intracellular APP maturation
Cluster_1	Dark Cyan	180	CCDC80	9606.ENSP00000206423	Coiled-coil domain containing 80; Promotes cell adhesion and matrix assembly
Cluster_1	Dark Cyan	180	ARF1	9606.ENSP00000272102	ADP-ribosylation factor 1; GTP-binding protein that functions as an allosteric activator of the cholera toxin catalytic subunit, an ADP- ribosyltransferase. Involved in protein trafficking among different compartments. Modulates vesicle budding and uncoating within the Golgi complex. Deactivation induces the redistribution of the entire Golgi complex to the endoplasmic reticulum, suggesting a cru…
Cluster_1	Dark Cyan	180	AP1G2	9606.ENSP00000312442	Adaptor-related protein complex 1, gamma 2 subunit; May function in protein sorting in late endosomes or multivesucular bodies (MVBs). Involved in MVB-assisted maturation of hepatitis B virus (HBV)
Cluster_1	Dark Cyan	180	CUL7	9606.ENSP00000438788	Cullin 7; Core component of the 3M and Cul7-RING(FBXW8) complexes, which mediates the ubiquitination of target proteins. Core component of the 3M complex, a complex required to regulate microtubule dynamics and genome integrity. It is unclear how the 3M complex regulates microtubules, it could act by controlling the level of a microtubule stabilizer (PubMed:24793695). Interaction with CUL9 is req…
Cluster_1	Dark Cyan	180	GAMT	9606.ENSP00000403536	Guanidinoacetate N-methyltransferase; Converts guanidinoacetate to creatine, using S- adenosylmethionine as the methyl donor (PubMed:26003046, PubMed:24415674, PubMed:26319512). Important in nervous system development (PubMed:24415674)
Cluster_1	Dark Cyan	180	MYOF	9606.ENSP00000352208	Myoferlin; Calcium/phospholipid-binding protein that plays a role in the plasmalemma repair mechanism of endothelial cells that permits rapid resealing of membranes disrupted by mechanical stress. Involved in endocytic recycling. Implicated in VEGF signal transduction by regulating the levels of the receptor KDR (By similarity)
Cluster_1	Dark Cyan	180	MED8	9606.ENSP00000290663	Mediator complex subunit 8; Component of the Mediator complex, a coactivator involved in the regulated transcription of nearly all RNA polymerase II-dependent genes. Mediator functions as a bridge to convey information from gene-specific regulatory proteins to the basal RNA polymerase II transcription machinery. Mediator is recruited to promoters by direct interactions with regulatory proteins an…
Cluster_1	Dark Cyan	180	ECI2	9606.ENSP00000369461	enoyl-CoA delta isomerase 2; Able to isomerize both 3-cis and 3-trans double bonds into the 2-trans form in a range of enoyl-CoA species. Has a preference for 3-trans substrates (By similarity)
Cluster_1	Dark Cyan	180	CKB	9606.ENSP00000299198	Creatine kinase, brain; Reversibly catalyzes the transfer of phosphate between ATP and various phosphogens (e.g. creatine phosphate). Creatine kinase isoenzymes play a central role in energy transduction in tissues with large, fluctuating energy demands, such as skeletal muscle, heart, brain and spermatozoa
Cluster_1	Dark Cyan	180	FZD4	9606.ENSP00000434034	Frizzled family receptor 4; Receptor for Wnt proteins. Most of frizzled receptors are coupled to the beta-catenin (CTNNB1) canonical signaling pathway, which leads to the activation of disheveled proteins, inhibition of GSK-3 kinase, nuclear accumulation of beta-catenin (CTNNB1) and activation of Wnt target genes. Plays a critical role in retinal vascularization by acting as a receptor for Wnt pr…
Cluster_1	Dark Cyan	180	XK	9606.ENSP00000367879	X-linked Kx blood group (McLeod syndrome); May be involved in sodium-dependent transport of neutral amino acids or oligopeptides
Cluster_1	Dark Cyan	180	MRPL14	9606.ENSP00000361084	Mitochondrial ribosomal protein L14; Forms part of 2 intersubunit bridges in the assembled ribosome. Upon binding to MALSU1 intersubunit bridge formation is blocked, preventing ribosome formation and repressing translation (Probable)
Cluster_1	Dark Cyan	180	CRTC3	9606.ENSP00000268184	CREB regulated transcription coactivator 3; Transcriptional coactivator for CREB1 which activates transcription through both consensus and variant cAMP response element (CRE) sites. Acts as a coactivator, in the SIK/TORC signaling pathway, being active when dephosphorylated and acts independently of CREB1 'Ser-133' phosphorylation. Enhances the interaction of CREB1 with TAF4. Regulates the expres…
Cluster_1	Dark Cyan	180	DHRS3	9606.ENSP00000365397	Dehydrogenase/reductase (SDR family) member 3; Catalyzes the reduction of all-trans-retinal to all- trans-retinol in the presence of NADPH
Cluster_1	Dark Cyan	180	CALCOCO1	9606.ENSP00000449960	Calcium binding and coiled-coil domain 1; Functions as a coactivator for aryl hydrocarbon and nuclear receptors (NR). Recruited to promoters through its contact with the N-terminal basic helix-loop-helix-Per-Arnt-Sim (PAS) domain of transcription factors or coactivators, such as NCOA2. During ER-activation acts synergistically in combination with other NCOA2-binding proteins, such as EP300, CREBB…
Cluster_1	Dark Cyan	180	EPB41L5	9606.ENSP00000263713	Erythrocyte membrane protein band 4.1 like 5; May contribute to the correct positioning of tight junctions during the establishment of polarity in epithelial cells
Cluster_1	Dark Cyan	180	JMJD6	9606.ENSP00000394085	Jumonji domain containing 6; Dioxygenase that can both act as a histone arginine demethylase and a lysyl-hydroxylase. Acts as a lysyl-hydroxylase that catalyzes 5-hydroxylation on specific lysine residues of target proteins such as U2AF2/U2AF65 and LUC7L2. Acts as a regulator of RNA splicing by mediating 5-hydroxylation of U2AF2/U2AF65, affecting the pre-mRNA splicing activity of U2AF2/U2AF65. In…
Cluster_1	Dark Cyan	180	LYSMD3	9606.ENSP00000314518	LysM, putative peptidoglycan-binding, domain containing 3
Cluster_1	Dark Cyan	180	CPD	9606.ENSP00000225719	Carboxypeptidase D
Cluster_1	Dark Cyan	180	IDH2	9606.ENSP00000331897	Isocitrate dehydrogenase 2 (NADP+), mitochondrial; Plays a role in intermediary metabolism and energy production. It may tightly associate or interact with the pyruvate dehydrogenase complex
Cluster_1	Dark Cyan	180	GSTK1	9606.ENSP00000431049	Glutathione S-transferase kappa 1
Cluster_1	Dark Cyan	180	MPC2	9606.ENSP00000271373	Mitochondrial pyruvate carrier 2; Mediates the uptake of pyruvate into mitochondria
Cluster_1	Dark Cyan	180	AMPD2	9606.ENSP00000256578	Adenosine monophosphate deaminase 2; AMP deaminase plays a critical role in energy metabolism. Catalyzes the deamination of AMP to IMP and plays an important role in the purine nucleotide cycle
Cluster_1	Dark Cyan	180	LOXL2	9606.ENSP00000373783	Lysyl oxidase-like 2; Mediates the post-translational oxidative deamination of lysine residues on target proteins leading to the formation of deaminated lysine (allysine). When secreted in extracellular matrix, promotes cross-linking of extracellular matrix proteins by mediating oxidative deamination of peptidyl lysine residues in precursors to fibrous collagen and elastin. Acts as a regulator of…
Cluster_1	Dark Cyan	180	BNIP3L	9606.ENSP00000370003	BCL2/adenovirus E1B 19kDa interacting protein 3-like; Induces apoptosis. Interacts with viral and cellular anti-apoptosis proteins. Can overcome the suppressors BCL-2 and BCL-XL, although high levels of BCL-XL expression will inhibit apoptosis. Inhibits apoptosis induced by BNIP3. Involved in mitochondrial quality control via its interaction with SPATA18/MIEAP: in response to mitochondrial damage…
Cluster_1	Dark Cyan	180	LIMCH1	9606.ENSP00000316891	LIM and calponin homology domains 1
Cluster_1	Dark Cyan	180	DMD	9606.ENSP00000354923	Dystrophin; Anchors the extracellular matrix to the cytoskeleton via F-actin. Ligand for dystroglycan. Component of the dystrophin- associated glycoprotein complex which accumulates at the neuromuscular junction (NMJ) and at a variety of synapses in the peripheral and central nervous systems and has a structural function in stabilizing the sarcolemma. Also implicated in signaling events and synap…
Cluster_1	Dark Cyan	180	ADAM9	9606.ENSP00000419446	ADAM metallopeptidase domain 9; Probable zinc protease. May mediate cell-cell or cell- matrix interactions. Isoform 2 displays alpha-secretase activity for APP
Cluster_1	Dark Cyan	180	CA3	9606.ENSP00000285381	Carbonic anhydrase III, muscle specific; Reversible hydration of carbon dioxide
Cluster_1	Dark Cyan	180	GNS	9606.ENSP00000258145	Glucosamine (N-acetyl)-6-sulfatase
Cluster_1	Dark Cyan	180	HDLBP	9606.ENSP00000312042	High density lipoprotein binding protein; Appears to play a role in cell sterol metabolism. It may function to protect cells from over-accumulation of cholesterol
Cluster_1	Dark Cyan	180	HMGCS2	9606.ENSP00000358414	3-hydroxy-3-methylglutaryl-CoA synthase 2 (mitochondrial); This enzyme condenses acetyl-CoA with acetoacetyl-CoA to form HMG-CoA, which is the substrate for HMG-CoA reductase
Cluster_1	Dark Cyan	180	LYPLAL1	9606.ENSP00000355895	Lysophospholipase-like 1; Has depalmitoylating activity toward KCNMA1. Does not exhibit phospholipase nor triacylglycerol lipase activity, able to hydrolyze only short chain substrates due to its shallow active site
Cluster_1	Dark Cyan	180	GJB1	9606.ENSP00000354900	Gap junction protein, beta 1, 32kDa; One gap junction consists of a cluster of closely packed pairs of transmembrane channels, the connexons, through which materials of low MW diffuse from one cell to a neighboring cell
Cluster_1	Dark Cyan	180	ASGR2	9606.ENSP00000347140	Asialoglycoprotein receptor 2; Mediates the endocytosis of plasma glycoproteins to which the terminal sialic acid residue on their complex carbohydrate moieties has been removed. The receptor recognizes terminal galactose and N-acetylgalactosamine units. After ligand binding to the receptor, the resulting complex is internalized and transported to a sorting organelle, where receptor and ligand ar…
Cluster_1	Dark Cyan	180	APLP2	9606.ENSP00000263574	Amyloid beta (A4) precursor-like protein 2; May play a role in the regulation of hemostasis. The soluble form may have inhibitory properties towards coagulation factors. May interact with cellular G-protein signaling pathways. May bind to the DNA 5'-GTCACATG-3'(CDEI box). Inhibits trypsin, chymotrypsin, plasmin, factor XIA and plasma and glandular kallikrein. Modulates the Cu/Zn nitric oxide-cata…
Cluster_1	Dark Cyan	180	IL1RAP	9606.ENSP00000314807	Interleukin 1 receptor accessory protein
Cluster_1	Dark Cyan	180	C14orf2	9606.ENSP00000401770	Chromosome 14 open reading frame 2
Cluster_1	Dark Cyan	180	MBNL2	9606.ENSP00000267287	Muscleblind-like splicing regulator 2; Mediates pre-mRNA alternative splicing regulation. Acts either as activator or repressor of splicing on specific pre-mRNA targets. Inhibits cardiac troponin-T (TNNT2) pre-mRNA exon inclusion but induces insulin receptor (IR) pre-mRNA exon inclusion in muscle. Antagonizes the alternative splicing activity pattern of CELF proteins. RNA-binding protein that bin…
Cluster_1	Dark Cyan	180	IYD	9606.ENSP00000229447	Iodotyrosine deiodinase; Catalyzes the oxidative NADPH-dependent deiodination of monoiodotyrosine (L-MIT) or diiodotyrosine (L-DIT). Acts during the hydrolysis of thyroglobulin to liberate iodide, which can then reenter the hormone-producing pathways. Acts more efficiently on monoiodotyrosine than on diiodotyrosine
Cluster_1	Dark Cyan	180	GATM	9606.ENSP00000379895	Glycine amidinotransferase (L-arginine:glycine amidinotransferase); Catalyzes the biosynthesis of guanidinoacetate, the immediate precursor of creatine. Creatine plays a vital role in energy metabolism in muscle tissues. May play a role in embryonic and central nervous system development. May be involved in the response to heart failure by elevating local creatine synthesis
Cluster_1	Dark Cyan	180	EFNA1	9606.ENSP00000357392	ephrin-A1; Cell surface GPI-bound ligand for Eph receptors, a family of receptor tyrosine kinases which are crucial for migration, repulsion and adhesion during neuronal, vascular and epithelial development. Binds promiscuously Eph receptors residing on adjacent cells, leading to contact-dependent bidirectional signaling into neighboring cells. Plays an important role in angiogenesis and tumor ne…
Cluster_1	Dark Cyan	180	FAM19A4	9606.ENSP00000295569	Family with sequence similarity 19 (chemokine (C-C motif)-like), member A4
Cluster_1	Dark Cyan	180	LRRC1	9606.ENSP00000359925	Leucine rich repeat containing 1
Cluster_1	Dark Cyan	180	ALDH6A1	9606.ENSP00000450436	Aldehyde dehydrogenase 6 family, member A1; Plays a role in valine and pyrimidine metabolism. Binds fatty acyl-CoA
Cluster_1	Dark Cyan	180	FRMD3	9606.ENSP00000303508	FERM domain containing 3; Putative tumor suppressor gene that may be implicated in the origin and progression of lung cancer
Cluster_1	Dark Cyan	180	CD164	9606.ENSP00000309376	CD164 molecule, sialomucin; Sialomucin that may play a key role in hematopoiesis by facilitating the adhesion of CD34(+) cells to the stroma and by negatively regulating CD34(+)CD38(lo/-) cell proliferation. Modulates the migration of umbilical cord blood CD133+ cells and this is mediated through the CXCL12/CXCR4 axis. May play an important role in prostate cancer metastasis and the infiltration …
Cluster_1	Dark Cyan	180	MASP1	9606.ENSP00000296280	Mannan-binding lectin serine peptidase 1 (C4/C2 activating component of Ra-reactive factor)
Cluster_1	Dark Cyan	180	PTPLB	9606.ENSP00000373153	Protein tyrosine phosphatase-like (proline instead of catalytic arginine), member b; Catalyzes the third of the four reactions of the long- chain fatty acids elongation cycle. This endoplasmic reticulum- bound enzymatic process, allows the addition of two carbons to the chain of long- and very long-chain fatty acids/VLCFAs per cycle. This enzyme catalyzes the dehydration of the 3-hydroxyacyl-CoA …
Cluster_1	Dark Cyan	180	ABCC2	9606.ENSP00000359478	ATP-binding cassette, sub-family C (CFTR/MRP), member 2; Mediates hepatobiliary excretion of numerous organic anions. May function as a cellular cisplatin transporter
Cluster_1	Dark Cyan	180	DCDC2	9606.ENSP00000367715	Doublecortin domain containing 2; Protein that plays a role in the inhibition of canonical Wnt signaling pathway. May be involved in neuronal migration during development of the cerebral neocortex. Involved in the control of ciliogenesis and ciliary length (PubMed:25601850)
Cluster_1	Dark Cyan	180	ETNK2	9606.ENSP00000356170	Ethanolamine kinase 2; Highly specific for ethanolamine phosphorylation. Does not have choline kinase activity (By similarity)
Cluster_1	Dark Cyan	180	EIF1B	9606.ENSP00000232905	Eukaryotic translation initiation factor 1B; Probably involved in translation
Cluster_1	Dark Cyan	180	FREM2	9606.ENSP00000280481	FRAS1 related extracellular matrix protein 2; Extracellular matrix protein required for maintenance of the integrity of the skin epithelium and for maintenance of renal epithelia. May be required for epidermal adhesion
Cluster_1	Dark Cyan	180	ERRFI1	9606.ENSP00000366702	ERBB receptor feedback inhibitor 1; Negative regulator of EGFR signaling in skin morphogenesis. Acts as a negative regulator for several EGFR family members, including ERBB2, ERBB3 and ERBB4. Inhibits EGFR catalytic activity by interfering with its dimerization. Inhibits autophosphorylation of EGFR, ERBB2 and ERBB4. Important for normal keratinocyte proliferation and differentiation. Plays a role…
Cluster_1	Dark Cyan	180	GPCPD1	9606.ENSP00000368305	Glycerophosphocholine phosphodiesterase GDE1 homolog (S. cerevisiae); May be involved in the negative regulation of skeletal muscle differentiation, independently of its glycerophosphocholine phosphodiesterase activity
Cluster_1	Dark Cyan	180	HOOK3	9606.ENSP00000305699	Hook homolog 3 (Drosophila); Probably serves as a target for the spiC protein from Salmonella typhimurium, which inactivates it, leading to a strong alteration in cellular trafficking (By similarity). Component of the FTS/Hook/FHIP complex (FHF complex). The FHF complex may function to promote vesicle trafficking and/or fusion via the homotypic vesicular protein sorting complex (the HOPS complex)…
Cluster_1	Dark Cyan	180	MPZL2	9606.ENSP00000278937	Myelin protein zero-like 2; Mediates homophilic cell-cell adhesion
Cluster_1	Dark Cyan	180	C16orf70	9606.ENSP00000219139	Chromosome 16 open reading frame 70
Cluster_1	Dark Cyan	180	MPC1	9606.ENSP00000354223	Mitochondrial pyruvate carrier 1; Mediates the uptake of pyruvate into mitochondria
Cluster_1	Dark Cyan	180	MAP1A	9606.ENSP00000300231	Microtubule-associated protein 1A; Structural protein involved in the filamentous cross- bridging between microtubules and other skeletal elements
Cluster_1	Dark Cyan	180	HSPB8	9606.ENSP00000281938	Heat shock 22kDa protein 8; Displays temperature-dependent chaperone activity
Cluster_1	Dark Cyan	180	APPL2	9606.ENSP00000258530	Adaptor protein, phosphotyrosine interaction, PH domain and leucine zipper containing 2; Required for the regulation of cell proliferation in response to extracellular signals mediated by an early endosomal compartment. Links Rab5 to nuclear signal transduction
Cluster_1	Dark Cyan	180	C4orf3	9606.ENSP00000382026	Chromosome 4 open reading frame 3
Cluster_1	Dark Cyan	180	IAH1	9606.ENSP00000417580	Isoamyl acetate-hydrolyzing esterase 1 homolog (S. cerevisiae); Probable lipase
Cluster_1	Dark Cyan	180	MAGED4	9606.ENSP00000364777	Melanoma antigen family D, 4; May enhance ubiquitin ligase activity of RING-type zinc finger-containing E3 ubiquitin-protein ligases. Proposed to act through recruitment and/or stabilization of the Ubl-conjugating enzyme (E2) at the E3:substrate complex
Cluster_1	Dark Cyan	180	C10orf118	9606.ENSP00000358293	Chromosome 10 open reading frame 118
Cluster_1	Dark Cyan	180	ECHDC2	9606.ENSP00000360577	Enoyl CoA hydratase domain containing 2
Cluster_1	Dark Cyan	180	BCAM	9606.ENSP00000270233	Basal cell adhesion molecule (Lutheran blood group); Laminin alpha-5 receptor. May mediate intracellular signaling
Cluster_1	Dark Cyan	180	B4GALT1	9606.ENSP00000369055	UDP-Gal:betaGlcNAc beta 1,4- galactosyltransferase, polypeptide 1; The Golgi complex form catalyzes the production of lactose in the lactating mammary gland and could also be responsible for the synthesis of complex-type N-linked oligosaccharides in many glycoproteins as well as the carbohydrate moieties of glycolipids
Cluster_1	Dark Cyan	180	MSMO1	9606.ENSP00000261507	Methylsterol monooxygenase 1; Catalyzes the first step in the removal of the two C-4 methyl groups of 4,4-dimethylzymosterol
Cluster_1	Dark Cyan	180	KLHL13	9606.ENSP00000443191	Kelch-like 13 (Drosophila); Substrate-specific adapter of a BCR (BTB-CUL3-RBX1) E3 ubiquitin-protein ligase complex required for mitotic progression and cytokinesis. The BCR(KLHL9-KLHL13) E3 ubiquitin ligase complex mediates the ubiquitination of AURKB and controls the dynamic behavior of AURKB on mitotic chromosomes and thereby coordinates faithful mitotic progression and completion of cytokines…
Cluster_1	Dark Cyan	180	CDH10	9606.ENSP00000264463	Cadherin 10, type 2 (T2-cadherin); Cadherins are calcium-dependent cell adhesion proteins. They preferentially interact with themselves in a homophilic manner in connecting cells; cadherins may thus contribute to the sorting of heterogeneous cell types
Cluster_1	Dark Cyan	180	DOK6	9606.ENSP00000372160	Docking protein 6; DOK proteins are enzymatically inert adaptor or scaffolding proteins. They provide a docking platform for the assembly of multimolecular signaling complexes. DOK6 promotes Ret- mediated neurite growth. May have a role in brain development and/or maintenance
Cluster_1	Dark Cyan	180	COG6	9606.ENSP00000397441	Component of oligomeric golgi complex 6; Required for normal Golgi function
Cluster_1	Dark Cyan	180	MBNL1	9606.ENSP00000282486	Muscleblind-like splicing regulator 1; Mediates pre-mRNA alternative splicing regulation. Acts either as activator or repressor of splicing on specific pre-mRNA targets. Inhibits cardiac troponin-T (TNNT2) pre-mRNA exon inclusion but induces insulin receptor (IR) pre-mRNA exon inclusion in muscle. Antagonizes the alternative splicing activity pattern of CELF proteins. Regulates the TNNT2 exon 5 s…
Cluster_1	Dark Cyan	180	LAMB1	9606.ENSP00000222399	Laminin, beta 1; Binding to cells via a high affinity receptor, laminin is thought to mediate the attachment, migration and organization of cells into tissues during embryonic development by interacting with other extracellular matrix components. Involved in the organization of the laminar architecture of cerebral cortex. It is probably required for the integrity of the basement membrane/glia lim…
Cluster_1	Dark Cyan	180	KCNMA1	9606.ENSP00000385806	Potassium large conductance calcium-activated channel, subfamily M, alpha member 1
Cluster_1	Dark Cyan	180	MYO9A	9606.ENSP00000348349	Myosin IXA; Myosins are actin-based motor molecules with ATPase activity. Unconventional myosins serve in intracellular movements. Regulates Rho activity in neurons, has a role in the regulation of neuronal morphology and function (By similarity)
Cluster_1	Dark Cyan	180	ARHGAP10	9606.ENSP00000336923	Rho GTPase activating protein 10; GTPase activator for the small GTPases RhoA and Cdc42 by converting them to an inactive GDP-bound state. Essential for PTKB2 regulation of cytoskeletal organization via Rho family GTPases. Inhibits PAK2 proteolytic fragment PAK-2p34 kinase activity and changes its localization from the nucleus to the perinuclear region. Stabilizes PAK-2p34 thereby increasing stim…
Cluster_1	Dark Cyan	180	ARL1	9606.ENSP00000261636	ADP-ribosylation factor-like 1; GTP-binding protein that has very low efficiency as allosteric activator of the cholera toxin catalytic subunit, an ADP-ribosyltransferase. Can activate phospholipase D with very low efficiency. Important for normal function of the Golgi apparatus
Cluster_1	Dark Cyan	180	CNIH	9606.ENSP00000216416	Cornichon homolog (Drosophila); Involved in the selective transport and maturation of TGF-alpha family proteins
Cluster_1	Dark Cyan	180	MTMR3	9606.ENSP00000384651	Myotubularin related protein 3; Phosphatase that acts on lipids with a phosphoinositol headgroup. Has phosphatase activity towards phosphatidylinositol 3-phosphate and phosphatidylinositol 3,5-bisphosphate. May also dephosphorylate proteins phosphorylated on Ser, Thr, and Tyr residues (PubMed:10733931)
Cluster_1	Dark Cyan	180	GOLGA2	9606.ENSP00000416097	Golgin A2; Peripheral membrane component of the cis-Golgi stack that acts as a membrane skeleton that maintains the structure of the Golgi apparatus, and as a vesicle thether that facilitates vesicle fusion to the Golgi membrane. Together with p115/USO1 and STX5, involved in vesicle tethering and fusion at the cis-Golgi membrane to maintain the stacked and inter-connected structure of the Golgi a…
Cluster_1	Dark Cyan	180	KLC4	9606.ENSP00000259708	Kinesin light chain 4; Kinesin is a microtubule-associated force-producing protein that may play a role in organelle transport. The light chain may function in coupling of cargo to the heavy chain or in the modulation of its ATPase activity (By similarity)
Cluster_1	Dark Cyan	180	MDM1	9606.ENSP00000302537	Mdm1 nuclear protein homolog (mouse); Microtubule-binding protein that negatively regulates centriole duplication. Binds to and stabilizes microtubules (PubMed:26337392)
Cluster_1	Dark Cyan	180	MSRB3	9606.ENSP00000347324	Methionine sulfoxide reductase B3; Catalyzes the reduction of free and protein-bound methionine sulfoxide to methionine. Isoform 2 is essential for hearing
Cluster_1	Dark Cyan	180	AP1M1	9606.ENSP00000388996	Adaptor-related protein complex 1, mu 1 subunit; Subunit of clathrin-associated adaptor protein complex 1 that plays a role in protein sorting in the trans-Golgi network (TGN) and endosomes. The AP complexes mediate the recruitment of clathrin to membranes and the recognition of sorting signals within the cytosolic tails of transmembrane cargo molecules
Cluster_1	Dark Cyan	180	EPSTI1	9606.ENSP00000318982	Epithelial stromal interaction 1 (breast)
Cluster_1	Dark Cyan	180	AIMP1	9606.ENSP00000378191	Aminoacyl tRNA synthetase complex-interacting multifunctional protein 1; Non-catalytic component of the multisynthase complex. Stimulates the catalytic activity of cytoplasmic arginyl-tRNA synthase. Binds tRNA. Possesses inflammatory cytokine activity. Negatively regulates TGF-beta signaling through stabilization of SMURF2 by binding to SMURF2 and inhibiting its SMAD7-mediated degradation. Involv…
Cluster_1	Dark Cyan	180	CUBN	9606.ENSP00000367064	Cubilin (intrinsic factor-cobalamin receptor); Cotransporter which plays a role in lipoprotein, vitamin and iron metabolism, by facilitating their uptake. Binds to ALB, MB, Kappa and lambda-light chains, TF, hemoglobin, GC, SCGB1A1, APOA1, high density lipoprotein, and the GIF-cobalamin complex. The binding of all ligands requires calcium. Serves as important transporter in several absorptive epi…
Cluster_1	Dark Cyan	180	C16orf62	9606.ENSP00000400815	Chromosome 16 open reading frame 62; Involved in copper-dependent ATP7A trafficking between the trans-Golgi network and vesicles in the cell periphery; the function is proposed to depend on its association within the CCC complex and cooperation with the WASH complex on early endosomes. Seems not to be required for CCC complex stability (PubMed:25355947)
Cluster_1	Dark Cyan	180	GOLGA8B	9606.ENSP00000267731	Golgin A8 family, member B; May be involved in maintaining Golgi structure
Cluster_1	Dark Cyan	180	HMGCS1	9606.ENSP00000322706	3-hydroxy-3-methylglutaryl-CoA synthase 1 (soluble); This enzyme condenses acetyl-CoA with acetoacetyl-CoA to form HMG-CoA, which is the substrate for HMG-CoA reductase
Cluster_1	Dark Cyan	180	CCNK	9606.ENSP00000374529	Cyclin K; Regulatory subunit of cyclin-dependent kinases that mediates activation of target kinases. Plays a role in transcriptional regulation via its role in regulating the phosphorylation of the C-terminal domain (CTD) of the large subunit of RNA polymerase II (POLR2A)
Cluster_1	Dark Cyan	180	HSD17B2	9606.ENSP00000199936	Hydroxysteroid (17-beta) dehydrogenase 2; Capable of catalyzing the interconversion of testosterone and androstenedione, as well as estradiol and estrone. Also has 20-alpha-HSD activity. Uses NADH while EDH17B3 uses NADPH
Cluster_1	Dark Cyan	180	F10	9606.ENSP00000364709	Coagulation factor X; Factor Xa is a vitamin K-dependent glycoprotein that converts prothrombin to thrombin in the presence of factor Va, calcium and phospholipid during blood clotting
Cluster_1	Dark Cyan	180	MYO18A	9606.ENSP00000437073	Myosin XVIIIA; May link Golgi membranes to the cytoskeleton and participate in the tensile force required for vesicle budding from the Golgi. Thereby, may play a role in Golgi membrane trafficking and could indirectly give its flattened shape to the Golgi apparatus. Alternatively, in concert with LURAP1 and CDC42BPA/CDC42BPB, has been involved in modulating lamellar actomyosin retrograde flow tha…
Cluster_1	Dark Cyan	180	HPN	9606.ENSP00000262626	Hepsin; Serine protease that cleaves extracellular substrates, and contributes to the proteolytic processing of growth factors, such as HGF and MST1/HGFL (PubMed:21875933, PubMed:15839837). Plays a role in cell growth and maintenance of cell morphology (PubMed:8346233, PubMed:21875933). Plays a role in the proteolytic processing of ACE2 (PubMed:24227843). Mediates the proteolytic cleavage of urin…
Cluster_1	Dark Cyan	180	GCNT1	9606.ENSP00000365920	Glucosaminyl (N-acetyl) transferase 1, core 2; Glycosyltransferase that catalyzes the transfer of an N- acetylglucosamine moiety onto mucin-type core 1 O-glycan to form the branched mucin-type core 2 O-glycan. Mucin-type core 2 O- glycans play an important role in leukocyte extravasation as they serve as scaffolds for the display of the selectin ligand sialyl Lewis X by leukocytes
Cluster_1	Dark Cyan	180	IDS	9606.ENSP00000339801	Iduronate 2-sulfatase; Required for the lysosomal degradation of heparan sulfate and dermatan sulfate
Cluster_1	Dark Cyan	180	CDC42EP2	9606.ENSP00000279249	CDC42 effector protein (Rho GTPase binding) 2; Probably involved in the organization of the actin cytoskeleton. May act downstream of CDC42 to induce actin filament assembly leading to cell shape changes. Induces pseudopodia formation in fibroblasts in a CDC42-dependent manner
Cluster_1	Dark Cyan	180	HIST1H2AC	9606.ENSP00000321389	Histone cluster 1, H2ac; Core component of nucleosome. Nucleosomes wrap and compact DNA into chromatin, limiting DNA accessibility to the cellular machineries which require DNA as a template. Histones thereby play a central role in transcription regulation, DNA repair, DNA replication and chromosomal stability. DNA accessibility is regulated via a complex set of post-translational modifications o…
Cluster_1	Dark Cyan	180	LMAN1	9606.ENSP00000251047	Lectin, mannose-binding, 1; Mannose-specific lectin. May recognize sugar residues of glycoproteins, glycolipids, or glycosylphosphatidyl inositol anchors and may be involved in the sorting or recycling of proteins, lipids, or both. The LMAN1-MCFD2 complex forms a specific cargo receptor for the ER-to-Golgi transport of selected proteins
Cluster_1	Dark Cyan	180	CTAGE1	9606.ENSP00000375220	Cutaneous T-cell lymphoma-associated antigen 1
Cluster_1	Dark Cyan	180	EFEMP1	9606.ENSP00000347596	EGF containing fibulin-like extracellular matrix protein 1; Binds EGFR, the EGF receptor, inducing EGFR autophosphorylation and the activation of downstream signaling pathways. May play a role in cell adhesion and migration. May function as a negative regulator of chondrocyte differentiation. In the olfactory epithelium, it may regulate glial cell migration, differentiation and the ability of gli…
Cluster_1	Dark Cyan	180	DAP	9606.ENSP00000230895	Death-associated protein; Negative regulator of autophagy. Involved in mediating interferon-gamma-induced cell death
Cluster_1	Dark Cyan	180	GGH	9606.ENSP00000260118	Gamma-glutamyl hydrolase (conjugase, folylpolygammaglutamyl hydrolase); Hydrolyzes the polyglutamate sidechains of pteroylpolyglutamates. Progressively removes gamma-glutamyl residues from pteroylpoly-gamma-glutamate to yield pteroyl-alpha- glutamate (folic acid) and free glutamate. May play an important role in the bioavailability of dietary pteroylpolyglutamates and in the metabolism of pteroyl…
Cluster_1	Dark Cyan	180	EHD1	9606.ENSP00000320516	EH-domain containing 1; ATP- and membrane-binding protein that controls membrane reorganization/tubulation upon ATP hydrolysis. Acts in early endocytic membrane fusion and membrane trafficking of recycling endosomes (PubMed:15020713, PubMed:17233914, PubMed:20801876). Recruited to endosomal membranes upon nerve growth factor stimulation, indirectly regulates neurite outgrowth (By similarity). Pla…
Cluster_1	Dark Cyan	180	IFRD1	9606.ENSP00000005558	Interferon-related developmental regulator 1; Could play a role in regulating gene activity in the proliferative and/or differentiative pathways induced by NGF. May be an autocrine factor that attenuates or amplifies the initial ligand-induced signal (By similarity)
Cluster_1	Dark Cyan	180	DEPDC7	9606.ENSP00000241051	DEP domain containing 7
Cluster_1	Dark Cyan	180	FMO1	9606.ENSP00000346901	Flavin containing monooxygenase 1; This protein is involved in the oxidative metabolism of a variety of xenobiotics such as drugs and pesticides. Form I catalyzes the N-oxygenation of secondary and tertiary amines
Cluster_1	Dark Cyan	180	LIPG	9606.ENSP00000261292	Lipase, endothelial; Has phospholipase and triglyceride lipase activities. Hydrolyzes high density lipoproteins (HDL) more efficiently than other lipoproteins. Binds heparin
Cluster_1	Dark Cyan	180	CCNE1	9606.ENSP00000262643	Cyclin E1; Essential for the control of the cell cycle at the G1/S (start) transition
Cluster_1	Dark Cyan	180	LENG8	9606.ENSP00000318374	Leukocyte receptor cluster (LRC) member 8
Cluster_1	Dark Cyan	180	MTTP	9606.ENSP00000265517	Microsomal triglyceride transfer protein; Catalyzes the transport of triglyceride, cholesteryl ester, and phospholipid between phospholipid surfaces (PubMed:23475612, PubMed:8939939, PubMed:26224785, PubMed:25108285, PubMed:22236406). Required for the secretion of plasma lipoproteins that contain apolipoprotein B (PubMed:23475612, PubMed:8939939, PubMed:26224785)
Cluster_1	Dark Cyan	180	DENND5B	9606.ENSP00000373734	DENN/MADD domain containing 5B; Guanine nucleotide exchange factor (GEF) which may activate RAB39A and/or RAB39B. Promotes the exchange of GDP to GTP, converting inactive GDP-bound Rab proteins into their active GTP-bound form
Cluster_1	Dark Cyan	180	COL18A1	9606.ENSP00000347665	Collagen, type XVIII, alpha 1; COLA18A probably plays a major role in determining the retinal structure as well as in the closure of the neural tube
Cluster_1	Dark Cyan	180	ADAMTS12	9606.ENSP00000422554	ADAM metallopeptidase with thrombospondin type 1 motif, 12; Metalloprotease that may play a role in the degradation of COMP. Cleaves also alpha-2 macroglobulin and aggregan. Has anti-tumorigenic properties
Cluster_1	Dark Cyan	180	FABP3	9606.ENSP00000362817	Fatty acid binding protein 3, muscle and heart (mammary-derived growth inhibitor); FABP are thought to play a role in the intracellular transport of long-chain fatty acids and their acyl-CoA esters
Cluster_1	Dark Cyan	180	ARRDC3	9606.ENSP00000265138	Arrestin domain containing 3; Adapter protein that plays a role in regulating cell- surface expression of adrenergic receptors and probably also other G protein-coupled receptors (PubMed:20559325, PubMed:21982743, PubMed:23208550). Plays a role in NEDD4-mediated ubiquitination and endocytosis af activated ADRB2 and subsequent ADRB2 degradation (PubMed:20559325, PubMed:23208550). May recruit NEDD4…
Cluster_1	Dark Cyan	180	ABHD5	9606.ENSP00000390849	Abhydrolase domain containing 5; Lysophosphatidic acid acyltransferase which functions in phosphatidic acid biosynthesis (PubMed:18606822). May regulate the cellular storage of triacylglycerol through activation of the phospholipase PNPLA2 (PubMed:16679289). Involved in keratinocyte differentiation (PubMed:18832586). Regulates lipid droplet fusion (By similarity)
Cluster_1	Dark Cyan	180	C8B	9606.ENSP00000360281	Complement component 8, beta polypeptide; Constituent of the membrane attack complex (MAC) that plays a key role in the innate and adaptive immune response by forming pores in the plasma membrane of target cells
Cluster_1	Dark Cyan	180	ABCA5	9606.ENSP00000376443	ATP-binding cassette, sub-family A (ABC1), member 5; May play a role in the processing of autolysosomes
Cluster_1	Dark Cyan	180	FTL	9606.ENSP00000366525	Ferritin, light polypeptide; Stores iron in a soluble, non-toxic, readily available form. Important for iron homeostasis. Iron is taken up in the ferrous form and deposited as ferric hydroxides after oxidation. Also plays a role in delivery of iron to cells. Mediates iron uptake in capsule cells of the developing kidney (By similarity)
Cluster_1	Dark Cyan	180	FAM198B	9606.ENSP00000377396	Family with sequence similarity 198, member B
Cluster_1	Dark Cyan	180	CGA	9606.ENSP00000358595	Glycoprotein hormones, alpha polypeptide
Cluster_1	Dark Cyan	180	FTCD	9606.ENSP00000291670	Formiminotransferase cyclodeaminase; Folate-dependent enzyme, that displays both transferase and deaminase activity. Serves to channel one-carbon units from formiminoglutamate to the folate pool
Cluster_1	Dark Cyan	180	MBNL3	9606.ENSP00000359890	Muscleblind-like splicing regulator 3; Mediates pre-mRNA alternative splicing regulation. Acts either as activator or repressor of splicing on specific pre-mRNA targets. Inhibits cardiac troponin-T (TNNT2) pre-mRNA exon inclusion but induces insulin receptor (IR) pre-mRNA exon inclusion in muscle. Antagonizes the alternative splicing activity pattern of CELF proteins. May play a role in myotonic …
Cluster_1	Dark Cyan	180	LRIG2	9606.ENSP00000355396	Leucine-rich repeats and immunoglobulin-like domains 2
Cluster_1	Dark Cyan	180	COPA	9606.ENSP00000357048	Coatomer protein complex, subunit alpha; The coatomer is a cytosolic protein complex that binds to dilysine motifs and reversibly associates with Golgi non- clathrin-coated vesicles, which further mediate biosynthetic protein transport from the ER, via the Golgi up to the trans Golgi network. Coatomer complex is required for budding from Golgi membranes, and is essential for the retrograde Golgi-…
Cluster_1	Dark Cyan	180	MYO5B	9606.ENSP00000285039	Myosin VB; May be involved in vesicular trafficking via its association with the CART complex. The CART complex is necessary for efficient transferrin receptor recycling but not for EGFR degradation. Required in a complex with RAB11A and RAB11FIP2 for the transport of NPC1L1 to the plasma membrane. Together with RAB11A participates in CFTR trafficking to the plasma membrane and TF (transferrin) r…
Cluster_1	Dark Cyan	180	ANTXR2	9606.ENSP00000306185	Anthrax toxin receptor 2; Necessary for cellular interactions with laminin and the extracellular matrix
Cluster_1	Dark Cyan	180	FAM13A	9606.ENSP00000264344	Family with sequence similarity 13, member A
Cluster_1	Dark Cyan	180	EPHX2	9606.ENSP00000430269	Epoxide hydrolase 2, cytoplasmic; Bifunctional enzyme. The C-terminal domain has epoxide hydrolase activity and acts on epoxides (alkene oxides, oxiranes) and arene oxides. Plays a role in xenobiotic metabolism by degrading potentially toxic epoxides. Also determines steady-state levels of physiological mediators. The N-terminal domain has lipid phosphatase activity, with the highest activity tow…
Cluster_1	Dark Cyan	180	AGMAT	9606.ENSP00000364986	Agmatine ureohydrolase (agmatinase)
Cluster_1	Dark Cyan	180	DAB2	9606.ENSP00000313391	Disabled homolog 2, mitogen-responsive phosphoprotein (Drosophila); Adapter protein that functions as clathrin-associated sorting protein (CLASP) required for clathrin-mediated endocytosis of selected cargo proteins. Can bind and assemble clathrin, and binds simultaneously to phosphatidylinositol 4,5-bisphosphate (PtdIns(4,5)P2) and cargos containg non-phosphorylated NPXY internalization motifs, …
Cluster_1	Dark Cyan	180	CA4	9606.ENSP00000300900	Carbonic anhydrase IV; Reversible hydration of carbon dioxide. May stimulate the sodium/bicarbonate transporter activity of SLC4A4 that acts in pH homeostasis. It is essential for acid overload removal from the retina and retina epithelium, and acid release in the choriocapillaris in the choroid
Cluster_1	Dark Cyan	180	ARL6IP5	9606.ENSP00000273258	ADP-ribosylation-like factor 6 interacting protein 5; Regulates intracellular concentrations of taurine and glutamate. Negatively modulates SLC1A1/EAAC1 glutamate transport activity by decreasing its affinity for glutamate in a PKC activity-dependent manner. May be involved in membrane traffic
Cluster_1	Dark Cyan	180	KLB	9606.ENSP00000257408	Klotho beta; Contributes to the transcriptional repression of cholesterol 7-alpha-hydroxylase (CYP7A1), the rate-limiting enzyme in bile acid synthesis. Probably inactive as a glycosidase. Increases the ability of FGFR1 and FGFR4 to bind FGF21 (By similarity)
Cluster_1	Dark Cyan	180	GLYCTK	9606.ENSP00000389175	Glycerate kinase
Cluster_1	Dark Cyan	180	CALU	9606.ENSP00000420381	Calumenin; Involved in regulation of vitamin K-dependent carboxylation of multiple N-terminal glutamate residues. Seems to inhibit gamma-carboxylase GGCX. Binds 7 calcium ions with a low affinity (By similarity)
Cluster_1	Dark Cyan	180	DPEP1	9606.ENSP00000261615	Dipeptidase 1 (renal); Hydrolyzes a wide range of dipeptides. Implicated in the renal metabolism of glutathione and its conjugates. Converts leukotriene D4 to leukotriene E4; it may play an important role in the regulation of leukotriene activity
Cluster_1	Dark Cyan	180	FAM190A	9606.ENSP00000329482	Family with sequence similarity 190, member A
Cluster_1	Dark Cyan	180	MEIS1	9606.ENSP00000272369	Meis homeobox 1; Acts as a transcriptional regulator of PAX6. Acts as a transcriptional activator of PF4 in complex with PBX1 or PBX2. Required for hematopoiesis, megakaryocyte lineage development and vascular patterning. May function as a cofactor for HOXA7 and HOXA9 in the induction of myeloid leukemias
Cluster_1	Dark Cyan	180	LAMP2	9606.ENSP00000408411	Lysosomal-associated membrane protein 2
Cluster_1	Dark Cyan	180	ACSL3	9606.ENSP00000350012	acyl-CoA synthetase long-chain family member 3; Acyl-CoA synthetases (ACSL) activates long-chain fatty acids for both synthesis of cellular lipids, and degradation via beta-oxidation. ACSL3 mediates hepatic lipogenesis (By similarity). Preferentially uses myristate, laurate, arachidonate and eicosapentaenoate as substrates (By similarity). Has mainly an anabolic role in energy metabolism. Require…
Cluster_1	Dark Cyan	180	FAM120B	9606.ENSP00000417970	Family with sequence similarity 120B; Functions as a transactivator of PPARG and ESR1. Functions in adipogenesis through PPARG activation (By similarity)
Cluster_1	Dark Cyan	180	DPYS	9606.ENSP00000276651	Dihydropyrimidinase; Catalyzes the second step of the reductive pyrimidine degradation, the reversible hydrolytic ring opening of dihydropyrimidines. Can catalyze the ring opening of 5,6- dihydrouracil to N-carbamyl-alanine and of 5,6-dihydrothymine to N-carbamyl-amino isobutyrate
Cluster_1	Dark Cyan	180	GAB1	9606.ENSP00000262995	GRB2-associated binding protein 1; Adapter protein that plays a role in intracellular signaling cascades triggered by activated receptor-type kinases. Plays a role in FGFR1 signaling. Probably involved in signaling by the epidermal growth factor receptor (EGFR) and the insulin receptor (INSR)
Cluster_1	Dark Cyan	180	LEAP2	9606.ENSP00000296877	Liver expressed antimicrobial peptide 2; Has an antimicrobial activity
Cluster_1	Dark Cyan	180	FAM213A	9606.ENSP00000361254	Family with sequence similarity 213, member A; Involved in redox regulation of the cell. Acts as an antioxidant. Inhibits TNFSF11-induced NFKB1 and JUN activation and osteoclast differentiation. May affect bone resorption and help to maintain bone mass
Cluster_1	Dark Cyan	180	AMOT	9606.ENSP00000361027	Angiomotin; Plays a central role in tight junction maintenance via the complex formed with ARHGAP17, which acts by regulating the uptake of polarity proteins at tight junctions. Appears to regulate endothelial cell migration and tube formation. May also play a role in the assembly of endothelial cell-cell junctions
Cluster_1	Dark Cyan	180	ELF3	9606.ENSP00000352673	E74-like factor 3 (ets domain transcription factor, epithelial-specific ); Transcriptional activator that binds and transactivates ETS sequences containing the consensus nucleotide core sequence GGA[AT]. Acts synergistically with POU2F3 to transactivate the SPRR2A promoter and with RUNX1 to transactivate the ANGPT1 promoter. Also transactivates collagenase, CCL20, CLND7, FLG, KRT8, NOS2, PTGS2, S…
Cluster_1	Dark Cyan	180	O3FAR1	9606.ENSP00000360538	Omega-3 fatty acid receptor 1; Receptor for medium and long-chain free fatty acids (FFAs). Signals via a G(q)/G(11)-coupled pathway. Acts as a receptor for omega-3 fatty acids and mediates robust anti- inflammatory effects, particularly in macrophages and fat cells. The anti-inflammatory effects involve inhibition of TAK1 through a beta-arrestin 2 (ARRB2)/TAB1-dependent effect, but independent of…
Cluster_1	Dark Cyan	180	GIPC2	9606.ENSP00000359795	GIPC PDZ domain containing family, member 2
Cluster_1	Dark Cyan	180	CRY1	9606.ENSP00000008527	Cryptochrome 1 (photolyase-like); Transcriptional repressor which forms a core component of the circadian clock. The circadian clock, an internal time- keeping system, regulates various physiological processes through the generation of approximately 24 hour circadian rhythms in gene expression, which are translated into rhythms in metabolism and behavior. It is derived from the Latin roots 'circa…
Cluster_1	Dark Cyan	180	ATG2B	9606.ENSP00000353010	Autophagy related 2B; Required for both autophagosome formation and regulation of lipid droplet morphology and dispersion
Cluster_1	Dark Cyan	180	C1orf43	9606.ENSP00000357507	Chromosome 1 open reading frame 43
Cluster_1	Dark Cyan	180	ARHGAP18	9606.ENSP00000275189	Rho GTPase activating protein 18; Rho GTPase activating protein that suppresses F-actin polymerization by inhibiting Rho. Rho GTPase activating proteins act by converting Rho-type GTPases to an inactive GDP-bound state (PubMed:21865595). Plays a key role in tissue tension and 3D tissue shape by regulating cortical actomyosin network formation. Acts downstream of YAP1 and inhibits actin polymeriza…
Cluster_1	Dark Cyan	180	ARHGDIB	9606.ENSP00000228945	Rho GDP dissociation inhibitor (GDI) beta; Regulates the GDP/GTP exchange reaction of the Rho proteins by inhibiting the dissociation of GDP from them, and the subsequent binding of GTP to them (PubMed:8356058, PubMed:7512369). Regulates reorganization of the actin cytoskeleton mediated by Rho family members (PubMed:8262133)
Cluster_1	Dark Cyan	180	IFT20	9606.ENSP00000350570	Intraflagellar transport 20 homolog (Chlamydomonas); Part of intraflagellar transport (IFT) particles involved in ciliary process assembly. May play a role in the trafficking of ciliary membrane proteins from the Golgi complex to the cilium. Also involved in autophagy since it is required for trafficking of ATG16L and the expansion of the autophagic compartment
Cluster_1	Dark Cyan	180	EEPD1	9606.ENSP00000242108	Endonuclease/exonuclease/phosphatase family domain containing 1
Cluster_1	Dark Cyan	180	ASH2L	9606.ENSP00000340896	Ash2 (absent, small, or homeotic)-like (Drosophila); Component of the Set1/Ash2 histone methyltransferase (HMT) complex, a complex that specifically methylates 'Lys-4' of histone H3, but not if the neighboring 'Lys-9' residue is already methylated. As part of the MLL1/MLL complex it is involved in methylation and dimethylation at 'Lys-4' of histone H3. May function as a transcriptional regulator.…
Cluster_1	Dark Cyan	180	LMBRD2	9606.ENSP00000296603	LMBR1 domain containing 2
Cluster_1	Dark Cyan	180	COBL	9606.ENSP00000265136	Cordon-bleu homolog (mouse); Plays an important role in the reorganization of the actin cytoskeleton. Regulates neuron morphogenesis and increases branching of axons and dendrites. Regulates dendrite branching in Purkinje cells (By similarity). Binds to and sequesters actin monomers (G actin). Nucleates actin polymerization by assembling three actin monomers in cross-filament orientation and ther…
Cluster_1	Dark Cyan	180	C11orf24	9606.ENSP00000307264	Chromosome 11 open reading frame 24
Cluster_1	Dark Cyan	180	ARHGAP5	9606.ENSP00000371897	Rho GTPase activating protein 5; GTPase-activating protein for Rho family members. May play a role in the reduction of the p21rasGTPase-activating potential of RASA1/p120GAP
Cluster_1	Dark Cyan	180	GPR39	9606.ENSP00000327417	G protein-coupled receptor 39; Zn(2+) acts as a agonist. This receptor mediates its action by association with G proteins that activate a phosphatidylinositol-calcium second messenger system. Its effect is mediated mainly through G(q)-alpha and G(12)/G(13) proteins. Involved in regulation of body weight, gastrointestinal mobility, hormone secretion and cell death (By similarity)
Cluster_1	Dark Cyan	180	MXD1	9606.ENSP00000264444	MAX dimerization protein 1; Transcriptional repressor. MAD binds with MAX to form a sequence-specific DNA-binding protein complex which recognizes the core sequence 5'-CAC[GA]TG-3'. MAD thus antagonizes MYC transcriptional activity by competing for MAX
Cluster_1	Dark Cyan	180	COTL1	9606.ENSP00000262428	Coactosin-like 1 (Dictyostelium); Binds to F-actin in a calcium-independent manner. Has no direct effect on actin depolymerization. Acts as a chaperone for ALOX5 (5LO), influencing both its stability and activity in leukotrienes synthesis
Cluster_1	Dark Cyan	180	HS6ST2	9606.ENSP00000429473	Heparan sulfate 6-O-sulfotransferase 2
Cluster_1	Dark Cyan	180	GPR133	9606.ENSP00000261654	G protein-coupled receptor 133; Orphan receptor. Signals via G(s)-alpha family of G- proteins
Cluster_1	Dark Cyan	180	FUT8	9606.ENSP00000353910	Fucosyltransferase 8 (alpha (1,6) fucosyltransferase); Catalyzes the addition of fucose in alpha 1-6 linkage to the first GlcNAc residue, next to the peptide chains in N-glycans
Cluster_1	Dark Cyan	180	KRT18	9606.ENSP00000373487	Keratin 18; Involved in the uptake of thrombin-antithrombin complexes by hepatic cells (By similarity). When phosphorylated, plays a role in filament reorganization. Involved in the delivery of mutated CFTR to the plasma membrane. Together with KRT8, is involved in interleukin-6 (IL-6)-mediated barrier protection
Cluster_1	Dark Cyan	180	CYP4B1	9606.ENSP00000360991	Cytochrome P450, family 4, subfamily B, polypeptide 1; Cytochromes P450 are a group of heme-thiolate monooxygenases. In liver microsomes, this enzyme is involved in an NADPH-dependent electron transport pathway. It oxidizes a variety of structurally unrelated compounds, including steroids, fatty acids, and xenobiotics
Cluster_1	Dark Cyan	180	KCNJ16	9606.ENSP00000283936	Potassium inwardly-rectifying channel, subfamily J, member 16; Inward rectifier potassium channels are characterized by a greater tendency to allow potassium to flow into the cell rather than out of it. Their voltage dependence is regulated by the concentration of extracellular potassium; as external potassium is raised, the voltage range of the channel opening shifts to more positive voltages. T…
Cluster_1	Dark Cyan	180	GRAMD1B	9606.ENSP00000436500	GRAM domain containing 1B
Cluster_1	Dark Cyan	180	GAS6	9606.ENSP00000331831	Growth arrest-specific 6
Cluster_2	Purple	15	MITF	9606.ENSP00000295600	Microphthalmia-associated transcription factor; Transcription factor that regulates the expression of genes with essential roles in cell differentiation, proliferation and survival. Binds to symmetrical DNA sequences (E-boxes) (5'- CACGTG-3') found in the promoters of target genes, such as BCL2 and tyrosinase (TYR). Plays an important role in melanocyte development by regulating the expression of…
Cluster_2	Purple	15	LEPR	9606.ENSP00000330393	Leptin receptor; Receptor for hormone LEP/leptin (Probable) (PubMed:22405007). On ligand binding, mediates LEP central and peripheral effects through the activation of different signaling pathways such as JAK2/STAT3 and MAPK cascade/FOS. In the hypothalamus, LEP acts as an appetite-regulating factor that induces a decrease in food intake and an increase in energy consumption by inducing anorexino…
Cluster_2	Purple	15	GSTA2	9606.ENSP00000420168	Glutathione S-transferase alpha 2; Conjugation of reduced glutathione to a wide number of exogenous and endogenous hydrophobic electrophiles
Cluster_2	Purple	15	ALK	9606.ENSP00000373700	Anaplastic lymphoma receptor tyrosine kinase; Neuronal orphan receptor tyrosine kinase that is essentially and transiently expressed in specific regions of the central and peripheral nervous systems and plays an important role in the genesis and differentiation of the nervous system. Transduces signals from ligands at the cell surface, through specific activation of the mitogen-activated protein …
Cluster_2	Purple	15	BMP2	9606.ENSP00000368104	Bone morphogenetic protein 2; Induces cartilage and bone formation (PubMed:3201241). Stimulates the differentiation of myoblasts into osteoblasts via the EIF2AK3-EIF2A- ATF4 pathway. BMP2 activation of EIF2AK3 stimulates phosphorylation of EIF2A which leads to increased expression of ATF4 which plays a central role in osteoblast differentiation. In addition stimulates TMEM119, which upregulates t…
Cluster_2	Purple	15	LMNA	9606.ENSP00000357283	Lamin A/C; Lamins are components of the nuclear lamina, a fibrous layer on the nucleoplasmic side of the inner nuclear membrane, which is thought to provide a framework for the nuclear envelope and may also interact with chromatin. Lamin A and C are present in equal amounts in the lamina of mammals. Plays an important role in nuclear assembly, chromatin organization, nuclear membrane and telomere…
Cluster_2	Purple	15	BRD2	9606.ENSP00000378702	Bromodomain containing 2; May play a role in spermatogenesis or folliculogenesis (By similarity). Binds hyperacetylated chromatin and plays a role in the regulation of transcription, probably by chromatin remodeling. Regulates transcription of the CCND1 gene. Plays a role in nucleosome assembly
Cluster_2	Purple	15	TK2	9606.ENSP00000414334	Thymidine kinase 2, mitochondrial; Deoxyribonucleoside kinase that phosphorylates thymidine, deoxycytidine, and deoxyuridine. Also phosphorylates anti-viral and anti-cancer nucleoside analogs
Cluster_2	Purple	15	CDK6	9606.ENSP00000265734	Cyclin-dependent kinase 6; Serine/threonine-protein kinase involved in the control of the cell cycle and differentiation; promotes G1/S transition. Phosphorylates pRB/RB1 and NPM1. Interacts with D-type G1 cyclins during interphase at G1 to form a pRB/RB1 kinase and controls the entrance into the cell cycle. Involved in initiation and maintenance of cell cycle exit during cell differentiation; pr…
Cluster_2	Purple	15	CDKN1A	9606.ENSP00000244741	Cyclin-dependent kinase inhibitor 1A (p21, Cip1); May be the important intermediate by which p53/TP53 mediates its role as an inhibitor of cellular proliferation in response to DNA damage. Binds to and inhibits cyclin-dependent kinase activity, preventing phosphorylation of critical cyclin- dependent kinase substrates and blocking cell cycle progression. Functions in the nuclear localization and …
Cluster_2	Purple	15	AGT	9606.ENSP00000355627	Angiotensinogen (serpin peptidase inhibitor, clade A, member 8); Essential component of the renin-angiotensin system (RAS), a potent regulator of blood pressure, body fluid and electrolyte homeostasis
Cluster_2	Purple	15	CD44	9606.ENSP00000398632	CD44 molecule (Indian blood group); Receptor for hyaluronic acid (HA). Mediates cell-cell and cell-matrix interactions through its affinity for HA, and possibly also through its affinity for other ligands such as osteopontin, collagens, and matrix metalloproteinases (MMPs). Adhesion with HA plays an important role in cell migration, tumor growth and progression. In cancer cells, may play an impor…
Cluster_2	Purple	15	HNF4A	9606.ENSP00000312987	Hepatocyte nuclear factor 4, alpha; Transcriptionally controlled transcription factor. Binds to DNA sites required for the transcription of alpha 1- antitrypsin, apolipoprotein CIII, transthyretin genes and HNF1- alpha. May be essential for development of the liver, kidney and intestine
Cluster_2	Purple	15	FOS	9606.ENSP00000306245	FBJ murine osteosarcoma viral oncogene homolog; Nuclear phosphoprotein which forms a tight but non- covalently linked complex with the JUN/AP-1 transcription factor. In the heterodimer, FOS and JUN/AP-1 basic regions each seems to interact with symmetrical DNA half sites. On TGF-beta activation, forms a multimeric SMAD3/SMAD4/JUN/FOS complex at the AP1/SMAD- binding site to regulate TGF-beta-medi…
Cluster_2	Purple	15	CA2	9606.ENSP00000285379	Carbonic anhydrase II; Essential for bone resorption and osteoclast differentiation (By similarity). Reversible hydration of carbon dioxide. Can hydrate cyanamide to urea. Involved in the regulation of fluid secretion into the anterior chamber of the eye. Contributes to intracellular pH regulation in the duodenal upper villous epithelium during proton-coupled peptide absorption. Stimulates the ch…
Cluster_3	Yellow	13	ALDH1A1	9606.ENSP00000297785	Aldehyde dehydrogenase 1 family, member A1; Binds free retinal and cellular retinol-binding protein- bound retinal. Can convert/oxidize retinaldehyde to retinoic acid (By similarity)
Cluster_3	Yellow	13	GLUD2	9606.ENSP00000327589	Glutamate dehydrogenase 2; Important for recycling the chief excitatory neurotransmitter, glutamate, during neurotransmission
Cluster_3	Yellow	13	DNAJB9	9606.ENSP00000249356	DnaJ (Hsp40) homolog, subfamily B, member 9; Involved in endoplasmic reticulum-associated degradation (ERAD) of misfolded proteins. Acts as a co-chaperone with an Hsp70 protein
Cluster_3	Yellow	13	CLK3	9606.ENSP00000378505	CDC-like kinase 3; Dual specificity kinase acting on both serine/threonine and tyrosine-containing substrates. Phosphorylates serine- and arginine-rich (SR) proteins of the spliceosomal complex. May be a constituent of a network of regulatory mechanisms that enable SR proteins to control RNA splicing and can cause redistribution of SR proteins from speckles to a diffuse nucleoplasmic distribution…
Cluster_3	Yellow	13	CCNG2	9606.ENSP00000315743	Cyclin G2; May play a role in growth regulation and in negative regulation of cell cycle progession
Cluster_3	Yellow	13	MAT1A	9606.ENSP00000361280	Methionine adenosyltransferase I, alpha; Catalyzes the formation of S-adenosylmethionine from methionine and ATP
Cluster_3	Yellow	13	HMGCL	9606.ENSP00000363614	3-hydroxymethyl-3-methylglutaryl-CoA lyase; Key enzyme in ketogenesis (ketone body formation). Terminal step in leucine catabolism. Ketone bodies (beta- hydroxybutyrate, acetoacetate and acetone) are essential as an alternative source of energy to glucose, as lipid precursors and as regulators of metabolism
Cluster_3	Yellow	13	DNAJC3	9606.ENSP00000365991	DnaJ (Hsp40) homolog, subfamily C, member 3; Involved in the unfolded protein response (UPR) during endoplasmic reticulum (ER) stress. Acts as a negative regulator of the EIF2AK4/GCN2 kinase activity by preventing the phosphorylation of eIF-2-alpha at 'Ser-52' and hence attenuating general protein synthesis under ER stress, hypothermic and amino acid starving stress conditions (By similarity). Co…
Cluster_3	Yellow	13	GLUD1	9606.ENSP00000277865	Glutamate dehydrogenase 1; Mitochondrial glutamate dehydrogenase that converts L- glutamate into alpha-ketoglutarate. Plays a key role in glutamine anaplerosis by producing alpha-ketoglutarate, an important intermediate in the tricarboxylic acid cycle. May be involved in learning and memory reactions by increasing the turnover of the excitatory neurotransmitter glutamate (By similarity)
Cluster_3	Yellow	13	ADHFE1	9606.ENSP00000379865	Alcohol dehydrogenase, iron containing, 1; Catalyzes the cofactor-independent reversible oxidation of gamma-hydroxybutyrate (GHB) to succinic semialdehyde (SSA) coupled to reduction of 2-ketoglutarate (2-KG) to D-2- hydroxyglutarate (D-2-HG). D,L-3-hydroxyisobutyrate and L-3- hydroxybutyrate (L-3-OHB) are also substrates for HOT with 10-fold lower activities
Cluster_3	Yellow	13	GFPT1	9606.ENSP00000354347	Glutamine--fructose-6-phosphate transaminase 1; Controls the flux of glucose into the hexosamine pathway. Most likely involved in regulating the availability of precursors for N- and O-linked glycosylation of proteins. Regulates the circadian expression of clock genes ARNTL/BMAL1 and CRY1
Cluster_3	Yellow	13	DERA	9606.ENSP00000416583	Deoxyribose-phosphate aldolase (putative); Catalyzes a reversible aldol reaction between acetaldehyde and D-glyceraldehyde 3-phosphate to generate 2-deoxy- D-ribose 5-phosphate. Participates in stress granule (SG) assembly. May allow ATP production from extracellular deoxyinosine in conditions of energy deprivation
Cluster_3	Yellow	13	ALDH18A1	9606.ENSP00000360268	Aldehyde dehydrogenase 18 family, member A1; Bifunctional enzyme that converts glutamate to glutamate 5-semialdehyde, an intermediate in the biosynthesis of proline, ornithine and arginine
Cluster_4	Green	13	GPX4	9606.ENSP00000346103	Glutathione peroxidase 4; Protects cells against membrane lipid peroxidation and cell death. Required for normal sperm development and male fertility. Could play a major role in protecting mammals from the toxicity of ingested lipid hydroperoxides. Essential for embryonic development. Protects from radiation and oxidative damage
Cluster_4	Green	13	AKR1D1	9606.ENSP00000242375	Aldo-keto reductase family 1, member D1 (delta 4-3-ketosteroid-5-beta-reductase); Efficiently catalyzes the reduction of progesterone, androstenedione, 17-alpha-hydroxyprogesterone and testosterone to 5-beta-reduced metabolites. The bile acid intermediates 7- alpha,12-alpha-dihydroxy-4-cholesten-3-one and 7-alpha-hydroxy-4- cholesten-3-one can also act as substrates
Cluster_4	Green	13	AKR1A1	9606.ENSP00000312606	Aldo-keto reductase family 1, member A1 (aldehyde reductase); Catalyzes the NADPH-dependent reduction of a variety of aromatic and aliphatic aldehydes to their corresponding alcohols. Catalyzes the reduction of mevaldate to mevalonic acid and of glyceraldehyde to glycerol. Has broad substrate specificity. In vitro substrates include succinic semialdehyde, 4- nitrobenzaldehyde, 1,2-naphthoquinone,…
Cluster_4	Green	13	CRAT	9606.ENSP00000315013	Carnitine O-acetyltransferase; Carnitine acetylase is specific for short chain fatty acids. Carnitine acetylase seems to affect the flux through the pyruvate dehydrogenase complex. It may be involved as well in the transport of acetyl-CoA into mitochondria
Cluster_4	Green	13	CAT	9606.ENSP00000241052	Catalase; Occurs in almost all aerobically respiring organisms and serves to protect cells from the toxic effects of hydrogen peroxide. Promotes growth of cells including T-cells, B-cells, myeloid leukemia cells, melanoma cells, mastocytoma cells and normal and transformed fibroblast cells
Cluster_4	Green	13	GPX8	9606.ENSP00000423822	Glutathione peroxidase 8 (putative)
Cluster_4	Green	13	CYB5R3	9606.ENSP00000354468	Cytochrome b5 reductase 3; Desaturation and elongation of fatty acids, cholesterol biosynthesis, drug metabolism, and, in erythrocyte, methemoglobin reduction
Cluster_4	Green	13	ANKS4B	9606.ENSP00000308772	Ankyrin repeat and sterile alpha motif domain containing 4B; As part of the intermicrovillar adhesion complex/IMAC plays a role in epithelial brush border differentiation, controlling microvilli organization and length. Plays a role in assembly of the complex (PubMed:26812018). May play a role in cellular response to endoplasmic reticulum stress (By similarity)
Cluster_4	Green	13	HSF2	9606.ENSP00000357440	Heat shock transcription factor 2; DNA-binding protein that specifically binds heat shock promoter elements (HSE) and activates transcription. In higher eukaryotes, HSF is unable to bind to the HSE unless the cells are heat shocked
Cluster_4	Green	13	CDKN2B	9606.ENSP00000276925	Cyclin-dependent kinase inhibitor 2B (p15, inhibits CDK4); Interacts strongly with CDK4 and CDK6. Potent inhibitor. Potential effector of TGF-beta induced cell cycle arrest
Cluster_4	Green	13	ANXA5	9606.ENSP00000296511	Annexin A5; This protein is an anticoagulant protein that acts as an indirect inhibitor of the thromboplastin-specific complex, which is involved in the blood coagulation cascade
Cluster_4	Green	13	LDHA	9606.ENSP00000445175	Lactate dehydrogenase A
Cluster_4	Green	13	KANK4	9606.ENSP00000360195	KN motif and ankyrin repeat domains 4; May be involved in the control of cytoskeleton formation by regulating actin polymerization
Cluster_5	Red	10	FLNB	9606.ENSP00000420213	Filamin B, beta; Connects cell membrane constituents to the actin cytoskeleton. May promote orthogonal branching of actin filaments and links actin filaments to membrane glycoproteins. Anchors various transmembrane proteins to the actin cytoskeleton. Interaction with FLNA may allow neuroblast migration from the ventricular zone into the cortical plate. Various interactions and localizations of is…
Cluster_5	Red	10	CREB3	9606.ENSP00000342136	cAMP responsive element binding protein 3
Cluster_5	Red	10	MYL12B	9606.ENSP00000237500	Myosin, light chain 12B, regulatory; Myosin regulatory subunit that plays an important role in regulation of both smooth muscle and nonmuscle cell contractile activity via its phosphorylation. Phosphorylation triggers actin polymerization in vascular smooth muscle. Implicated in cytokinesis, receptor capping, and cell locomotion (By similarity)
Cluster_5	Red	10	MYL9	9606.ENSP00000279022	Myosin, light chain 9, regulatory; Myosin regulatory subunit that plays an important role in regulation of both smooth muscle and nonmuscle cell contractile activity via its phosphorylation. Implicated in cytokinesis, receptor capping, and cell locomotion
Cluster_5	Red	10	KCNIP4	9606.ENSP00000371587	Kv channel interacting protein 4; Regulatory subunit of Kv4/D (Shal)-type voltage-gated rapidly inactivating A-type potassium channels. Modulates KCND2 channel density, inactivation kinetics and rate of recovery from inactivation in a calcium-dependent and isoform-specific manner (PubMed:11847232, PubMed:18957440, PubMed:23576435). Modulates KCND3/Kv4.3 currents (PubMed:23576435). Isoform 4 does …
Cluster_5	Red	10	CAMK2D	9606.ENSP00000339740	Calcium/calmodulin-dependent protein kinase II delta; Calcium/calmodulin-dependent protein kinase involved in the regulation of Ca(2+) homeostatis and excitation-contraction coupling (ECC) in heart by targeting ion channels, transporters and accessory proteins involved in Ca(2+) influx into the myocyte, Ca(2+) release from the sarcoplasmic reticulum (SR), SR Ca(2+) uptake and Na(+) and K(+) chann…
Cluster_5	Red	10	CREB3L3	9606.ENSP00000078445	cAMP responsive element binding protein 3-like 3; Transcription factor that may act during endoplasmic reticulum stress by activating unfolded protein response target genes. Activated in response to cAMP stimulation. In vitro, binds to the cAMP response element (CRE) and box-B element. Activates transcription through box-B element. Activates transcription through CRE (By similarity). Seems to fun…
Cluster_5	Red	10	ASPH	9606.ENSP00000368767	Aspartate beta-hydroxylase; Isoform 1: specifically hydroxylates an Asp or Asn residue in certain epidermal growth factor-like (EGF) domains of a number of proteins
Cluster_5	Red	10	MYO6	9606.ENSP00000358994	Myosin VI; Myosins are actin-based motor molecules with ATPase activity. Unconventional myosins serve in intracellular movements. Myosin 6 is a reverse-direction motor protein that moves towards the minus-end of actin filaments. Has slow rate of actin-activated ADP release due to weak ATP binding. Functions in a variety of intracellular processes such as vesicular membrane trafficking and cell mi…
Cluster_5	Red	10	DLG1	9606.ENSP00000345731	Discs, large homolog 1 (Drosophila); Essential multidomain scaffolding protein required for normal development (By similarity). Recruits channels, receptors and signaling molecules to discrete plasma membrane domains in polarized cells. May play a role in adherens junction assembly, signal transduction, cell proliferation, synaptogenesis and lymphocyte activation. Regulates the excitability of ca…
Cluster_6	Medium Aqua Marine	8	GNRH2	9606.ENSP00000245983	Gonadotropin-releasing hormone 2; Stimulates the secretion of gonadotropins; it stimulates the secretion of both luteinizing and follicle-stimulating hormones
Cluster_6	Medium Aqua Marine	8	KALRN	9606.ENSP00000240874	Kalirin, RhoGEF kinase; Promotes the exchange of GDP by GTP. Activates specific Rho GTPase family members, thereby inducing various signaling mechanisms that regulate neuronal shape, growth, and plasticity, through their effects on the actin cytoskeleton. Induces lamellipodia independent of its GEF activity
Cluster_6	Medium Aqua Marine	8	KNG1	9606.ENSP00000265023	Kininogen 1; (1) Kininogens are inhibitors of thiol proteases; (2) HMW-kininogen plays an important role in blood coagulation by helping to position optimally prekallikrein and factor XI next to factor XII; (3) HMW-kininogen inhibits the thrombin- and plasmin- induced aggregation of thrombocytes; (4) the active peptide bradykinin that is released from HMW-kininogen shows a variety of physiologica…
Cluster_6	Medium Aqua Marine	8	GNG5	9606.ENSP00000359675	Guanine nucleotide binding protein (G protein), gamma 5; Guanine nucleotide-binding proteins (G proteins) are involved as a modulator or transducer in various transmembrane signaling systems. The beta and gamma chains are required for the GTPase activity, for replacement of GDP by GTP, and for G protein- effector interaction
Cluster_6	Medium Aqua Marine	8	ANXA4	9606.ENSP00000377833	Annexin A4; Calcium/phospholipid-binding protein which promotes membrane fusion and is involved in exocytosis
Cluster_6	Medium Aqua Marine	8	ANXA2	9606.ENSP00000346032	Annexin A2; Calcium-regulated membrane-binding protein whose affinity for calcium is greatly enhanced by anionic phospholipids. It binds two calcium ions with high affinity. May be involved in heat-stress response. Inhibits PCSK9-enhanced LDLR degradation, probably reduces PCSK9 protein levels via a translational mechanism but also competes with LDLR for binding with PCSK9 (PubMed:18799458, PubMe…
Cluster_6	Medium Aqua Marine	8	ANXA1	9606.ENSP00000257497	Annexin A1; Plays important roles in the innate immune response as effector of glucocorticoid-mediated responses and regulator of the inflammatory process. Has anti-inflammatory activity (PubMed:8425544). Plays a role in glucocorticoid-mediated down- regulation of the early phase of the inflammatory response (By similarity). Promotes resolution of inflammation and wound healing (PubMed:25664854).…
Cluster_6	Medium Aqua Marine	8	ANXA6	9606.ENSP00000346550	Annexin A6; May associate with CD21. May regulate the release of Ca(2+) from intracellular stores

## Sheet: STRING_HLC
#cluster name	cluster color	gene count	protein name	protein identifier	protein description
Cluster_1	Blue	194	HGD	9606.ENSP00000283871	Homogentisate 1,2-dioxygenase
Cluster_1	Blue	194	CA8	9606.ENSP00000314407	Carbonic anhydrase VIII; Does not have a carbonic anhydrase catalytic activity
Cluster_1	Blue	194	CREB3L1	9606.ENSP00000434939	cAMP responsive element binding protein 3-like 1; Transcription factor involved in unfolded protein response (UPR). In the absence of endoplasmic reticulum (ER) stress, inserted into ER membranes, with N-terminal DNA-binding and transcription activation domains oriented toward the cytosolic face of the membrane. In response to ER stress, transported to the Golgi, where it is cleaved in a site-spe…
Cluster_1	Blue	194	FKBP10	9606.ENSP00000317232	FK506 binding protein 10, 65 kDa; PPIases accelerate the folding of proteins during protein synthesis
Cluster_1	Blue	194	ACSL1	9606.ENSP00000281455	acyl-CoA synthetase long-chain family member 1; Activation of long-chain fatty acids for both synthesis of cellular lipids, and degradation via beta-oxidation. Preferentially uses palmitoleate, oleate and linoleate
Cluster_1	Blue	194	MICAL2	9606.ENSP00000256194	Microtubule associated monoxygenase, calponin and LIM domain containing 2; Nuclear monooxygenase that promotes depolymerization of F-actin by mediating oxidation of specific methionine residues on actin and regulates the SRF signaling. Acts by modifying nuclear actin subunits through the addition of oxygen to form methionine- sulfoxide, leading to promote actin filament severing and prevent repol…
Cluster_1	Blue	194	F2RL1	9606.ENSP00000296677	Coagulation factor II (thrombin) receptor-like 1; Receptor for trypsin and trypsin-like enzymes coupled to G proteins. Its function is mediated through the activation of several signaling pathways including phospholipase C (PLC), intracellular calcium, mitogen-activated protein kinase (MAPK), I- kappaB kinase/NF-kappaB and Rho. Can also be transactivated by cleaved F2R/PAR1. Involved in modulatio…
Cluster_1	Blue	194	INSIG1	9606.ENSP00000344741	Insulin induced gene 1; Mediates feedback control of cholesterol synthesis by controlling SCAP and HMGCR. Functions by blocking the processing of sterol regulatory element-binding proteins (SREBPs). Capable of retaining the SCAP-SREBF2 complex in the ER thus preventing it from escorting SREBPs to the Golgi. Initiates the sterol-mediated ubiquitin-mediated endoplasmic reticulum-associated degradat…
Cluster_1	Blue	194	DUSP3	9606.ENSP00000226004	Dual specificity phosphatase 3; Shows activity both for tyrosine-protein phosphate and serine-protein phosphate, but displays a strong preference toward phosphotyrosines. Specifically dephosphorylates and inactivates ERK1 and ERK2
Cluster_1	Blue	194	XK	9606.ENSP00000367879	X-linked Kx blood group (McLeod syndrome); May be involved in sodium-dependent transport of neutral amino acids or oligopeptides
Cluster_1	Blue	194	CST3	9606.ENSP00000366124	Cystatin C; As an inhibitor of cysteine proteinases, this protein is thought to serve an important physiological role as a local regulator of this enzyme activity
Cluster_1	Blue	194	BNC2	9606.ENSP00000370047	Basonuclin 2; Probable transcription factor specific for skin keratinocytes. May play a role in the differentiation of spermatozoa and oocytes
Cluster_1	Blue	194	CLU	9606.ENSP00000315130	Clusterin; Isoform 1 functions as extracellular chaperone that prevents aggregation of nonnative proteins. Prevents stress- induced aggregation of blood plasma proteins. Inhibits formation of amyloid fibrils by APP, APOC2, B2M, CALCA, CSN3, SNCA and aggregation-prone LYZ variants (in vitro). Does not require ATP. Maintains partially unfolded proteins in a state appropriate for subsequent refoldin…
Cluster_1	Blue	194	ARHGAP31	9606.ENSP00000264245	Rho GTPase activating protein 31; Functions as a GTPase-activating protein (GAP) for RAC1 and CDC42. Required for cell spreading, polarized lamellipodia formation and cell migration
Cluster_1	Blue	194	CCBE1	9606.ENSP00000404464	Collagen and calcium binding EGF domains 1; Required for lymphangioblast budding and angiogenic sprouting from venous endothelium during embryogenesis
Cluster_1	Blue	194	BNIP3	9606.ENSP00000357625	BCL2/adenovirus E1B 19kDa interacting protein 3; Apoptosis-inducing protein that can overcome BCL2 suppression. May play a role in repartitioning calcium between the two major intracellular calcium stores in association with BCL2. Involved in mitochondrial quality control via its interaction with SPATA18/MIEAP: in response to mitochondrial damage, participates to mitochondrial protein catabolic p…
Cluster_1	Blue	194	CYB5R1	9606.ENSP00000356218	Cytochrome b5 reductase 1; NADH-cytochrome b5 reductases are involved in desaturation and elongation of fatty acids, cholesterol biosynthesis, drug metabolism, and, in erythrocyte, methemoglobin reduction
Cluster_1	Blue	194	HKDC1	9606.ENSP00000346643	Hexokinase domain containing 1
Cluster_1	Blue	194	MVD	9606.ENSP00000301012	Mevalonate (diphospho) decarboxylase; Performs the first committed step in the biosynthesis of isoprenes
Cluster_1	Blue	194	HPD	9606.ENSP00000289004	4-hydroxyphenylpyruvate dioxygenase; Key enzyme in the degradation of tyrosine
Cluster_1	Blue	194	GNG11	9606.ENSP00000248564	Guanine nucleotide binding protein (G protein), gamma 11; Guanine nucleotide-binding proteins (G proteins) are involved as a modulator or transducer in various transmembrane signaling systems. The beta and gamma chains are required for the GTPase activity, for replacement of GDP by GTP, and for G protein- effector interaction
Cluster_1	Blue	194	ATP6AP1	9606.ENSP00000358777	ATPase, H+ transporting, lysosomal accessory protein 1; Vacuolar ATPase is responsible for acidifying a variety of intracellular compartments in eukaryotic cells
Cluster_1	Blue	194	C1S	9606.ENSP00000328173	Complement component 1, s subcomponent; C1s B chain is a serine protease that combines with C1q and C1r to form C1, the first component of the classical pathway of the complement system. C1r activates C1s so that it can, in turn, activate C2 and C4
Cluster_1	Blue	194	DNAJC15	9606.ENSP00000368523	DnaJ (Hsp40) homolog, subfamily C, member 15; Negative regulator of the mitochondrial respiratory chain. Prevents mitochondrial hyperpolarization state and restricts mitochondrial generation of ATP (By similarity). Acts as an import component of the TIM23 translocase complex. Stimulates the ATPase activity of HSPA9
Cluster_1	Blue	194	LPIN1	9606.ENSP00000256720	Lipin 1; Plays important roles in controlling the metabolism of fatty acids at differents levels. Acts as a magnesium-dependent phosphatidate phosphatase enzyme which catalyzes the conversion of phosphatidic acid to diacylglycerol during triglyceride, phosphatidylcholine and phosphatidylethanolamine biosynthesis in the reticulum endoplasmic membrane. Acts also as a nuclear transcriptional coactiv…
Cluster_1	Blue	194	FAM177A1	9606.ENSP00000280987	Family with sequence similarity 177, member A1
Cluster_1	Blue	194	KIAA1217	9606.ENSP00000365637	KIAA1217; Required for normal development of intervertebral disks
Cluster_1	Blue	194	EGLN1	9606.ENSP00000355601	Egl nine homolog 1 (C. elegans); Cellular oxygen sensor that catalyzes, under normoxic conditions, the post-translational formation of 4-hydroxyproline in hypoxia-inducible factor (HIF) alpha proteins. Hydroxylates a specific proline found in each of the oxygen-dependent degradation (ODD) domains (N-terminal, NODD, and C-terminal, CODD) of HIF1A. Also hydroxylates HIF2A. Has a preference for the …
Cluster_1	Blue	194	FNIP2	9606.ENSP00000264433	Folliculin interacting protein 2; May play a role in the signal transduction pathway of apoptosis induced by O6-methylguanine-mispaired lesions (By similarity). May be involved in energy and/or nutrient sensing through the AMPK and mTOR signaling pathways. May regulate phosphorylation of RPS6KB1
Cluster_1	Blue	194	HSD17B14	9606.ENSP00000263278	Hydroxysteroid (17-beta) dehydrogenase 14; Has NAD-dependent 17-beta-hydroxysteroid dehydrogenase activity. Converts oestradiol to oestrone. The physiological substrate is not known. Acts on oestradiol and 5-androstene-3- beta,17-beta-diol (in vitro)
Cluster_1	Blue	194	MAN1A1	9606.ENSP00000357453	Mannosidase, alpha, class 1A, member 1; Involved in the maturation of Asn-linked oligosaccharides. Progressively trim alpha-1,2-linked mannose residues from Man(9)GlcNAc(2) to produce Man(5)GlcNAc(2)
Cluster_1	Blue	194	MAGED2	9606.ENSP00000218439	Melanoma antigen family D, 2
Cluster_1	Blue	194	DNAH2	9606.ENSP00000373825	Dynein, axonemal, heavy chain 2; Force generating protein of respiratory cilia. Produces force towards the minus ends of microtubules. Dynein has ATPase activity; the force-producing power stroke is thought to occur on release of ADP. Involved in sperm motility; implicated in sperm flagellar assembly (By similarity)
Cluster_1	Blue	194	EFNB1	9606.ENSP00000204961	ephrin-B1; Binds to the receptor tyrosine kinases EPHB1 and EPHA1. Binds to, and induce the collapse of, commissural axons/growth cones in vitro. May play a role in constraining the orientation of longitudinally projecting axons (By similarity)
Cluster_1	Blue	194	MRC2	9606.ENSP00000307513	Mannose receptor, C type 2; May play a role as endocytotic lectin receptor displaying calcium-dependent lectin activity. Internalizes glycosylated ligands from the extracellular space for release in an endosomal compartment via clathrin-mediated endocytosis. May be involved in plasminogen activation system controlling the extracellular level of PLAUR/PLAU, and thus may regulate protease activity …
Cluster_1	Blue	194	GABRP	9606.ENSP00000265294	Gamma-aminobutyric acid (GABA) A receptor, pi; GABA, the major inhibitory neurotransmitter in the vertebrate brain, mediates neuronal inhibition by binding to the GABA/benzodiazepine receptor and opening an integral chloride channel. In the uterus, the function of the receptor appears to be related to tissue contractility. The binding of this pI subunit with other GABA(A) receptor subunits alters…
Cluster_1	Blue	194	MEP1A	9606.ENSP00000230588	Meprin A, alpha (PABA peptide hydrolase)
Cluster_1	Blue	194	GUCY2C	9606.ENSP00000261170	Guanylate cyclase 2C (heat stable enterotoxin receptor); Receptor for the E.coli heat-stable enterotoxin (E.coli enterotoxin markedly stimulates the accumulation of cGMP in mammalian cells expressing GC-C). Also activated by the endogenous peptides guanylin and uroguanylin
Cluster_1	Blue	194	MEIS2	9606.ENSP00000453793	Meis homeobox 2; Involved in transcriptional regulation. Binds to HOX or PBX proteins to form dimers, or to a DNA-bound dimer of PBX and HOX proteins and thought to have a role in stabilization of the homeoprotein-DNA complex. Isoform 3/Meis2B is required for the activity of a PDX1:PBX1b:MEIS2b complex in pancreatic acinar cells involved in the transcriptional activation of the ELA1 enhancer; the…
Cluster_1	Blue	194	CRISPLD2	9606.ENSP00000262424	Cysteine-rich secretory protein LCCL domain containing 2; Promotes matrix assembly
Cluster_1	Blue	194	ATP1B1	9606.ENSP00000356789	ATPase, Na+/K+ transporting, beta 1 polypeptide; This is the non-catalytic component of the active enzyme, which catalyzes the hydrolysis of ATP coupled with the exchange of Na(+) and K(+) ions across the plasma membrane. The beta subunit regulates, through assembly of alpha/beta heterodimers, the number of sodium pumps transported to the plasma membrane
Cluster_1	Blue	194	EVI5	9606.ENSP00000359356	Ecotropic viral integration site 5; Functions as a regulator of cell cycle progression by stabilizing the FBXO5 protein and promoting cyclin-A accumulation during interphase. May play a role in cytokinesis
Cluster_1	Blue	194	CPED1	9606.ENSP00000309772	Cadherin-like and PC-esterase domain containing 1
Cluster_1	Blue	194	DPP7	9606.ENSP00000360635	Dipeptidyl-peptidase 7; Plays an important role in the degradation of some oligopeptides
Cluster_1	Blue	194	DKK2	9606.ENSP00000285311	Dickkopf 2 homolog (Xenopus laevis); Antagonizes canonical Wnt signaling by inhibiting LRP5/6 interaction with Wnt and by forming a ternary complex with the transmembrane protein KREMEN that promotes internalization of LRP5/6. DKKs play an important role in vertebrate development, where they locally inhibit Wnt regulated processes such as antero- posterior axial patterning, limb development, somi…
Cluster_1	Blue	194	APLNR	9606.ENSP00000257254	Apelin receptor; Receptor for apelin coupled to G proteins that inhibit adenylate cyclase activity and plays a role in various processes in adults such as regulation of blood pressure, heart contractility, and heart failure. Also plays a key role in early development such as gastrulation and heart morphogenesis by acting as a receptor for APELA hormone. Alternative coreceptor with CD4 for HIV-1 i…
Cluster_1	Blue	194	FRZB	9606.ENSP00000295113	Frizzled-related protein; Soluble frizzled-related proteins (sFRPS) function as modulators of Wnt signaling through direct interaction with Wnts. They have a role in regulating cell growth and differentiation in specific cell types. SFRP3/FRZB appears to be involved in limb skeletogenesis. Antagonist of Wnt8 signaling. Regulates chondrocyte maturation and long bone development
Cluster_1	Blue	194	LSS	9606.ENSP00000348762	Lanosterol synthase (2,3-oxidosqualene-lanosterol cyclase); Catalyzes the cyclization of (S)-2,3 oxidosqualene to lanosterol, a reaction that forms the sterol nucleus. Through the production of lanosterol may regulate lens protein aggregation and increase transparency
Cluster_1	Blue	194	BICC1	9606.ENSP00000362993	Bicaudal C homolog 1 (Drosophila); Putative RNA-binding protein. Acts as a negative regulator of Wnt signaling. May be involved in regulating gene expression during embryonic development
Cluster_1	Blue	194	DHCR7	9606.ENSP00000347717	7-dehydrocholesterol reductase; Production of cholesterol by reduction of C7-C8 double bond of 7-dehydrocholesterol (7-DHC)
Cluster_1	Blue	194	CDH6	9606.ENSP00000265071	Cadherin 6, type 2, K-cadherin (fetal kidney); Cadherins are calcium-dependent cell adhesion proteins. They preferentially interact with themselves in a homophilic manner in connecting cells; cadherins may thus contribute to the sorting of heterogeneous cell types
Cluster_1	Blue	194	GOLGB1	9606.ENSP00000341848	Golgin B1; May participate in forming intercisternal cross-bridges of the Golgi complex
Cluster_1	Blue	194	C5	9606.ENSP00000223642	Complement component 5; Activation of C5 by a C5 convertase initiates the spontaneous assembly of the late complement components, C5-C9, into the membrane attack complex. C5b has a transient binding site for C6. The C5b-C6 complex is the foundation upon which the lytic complex is assembled
Cluster_1	Blue	194	CLSTN2	9606.ENSP00000402460	Calsyntenin 2; May modulate calcium-mediated postsynaptic signals
Cluster_1	Blue	194	ATP2B1	9606.ENSP00000261173	ATPase, Ca++ transporting, plasma membrane 1; This magnesium-dependent enzyme catalyzes the hydrolysis of ATP coupled with the transport of calcium out of the cell
Cluster_1	Blue	194	C7orf63	9606.ENSP00000373948	Chromosome 7 open reading frame 63
Cluster_1	Blue	194	ACSL5	9606.ENSP00000348429	acyl-CoA synthetase long-chain family member 5; Acyl-CoA synthetases (ACSL) activate long-chain fatty acids for both synthesis of cellular lipids, and degradation via beta-oxidation. ACSL5 may activate fatty acids from exogenous sources for the synthesis of triacylglycerol destined for intracellular storage (By similarity). Utilizes a wide range of saturated fatty acids with a preference for C16-…
Cluster_1	Blue	194	ANXA3	9606.ENSP00000264908	Annexin A3; Inhibitor of phospholipase A2, also possesses anti- coagulant properties. Also cleaves the cyclic bond of inositol 1,2-cyclic phosphate to form inositol 1-phosphate
Cluster_1	Blue	194	ANXA8L1	9606.ENSP00000352101	Annexin A8-like 1
Cluster_1	Blue	194	ITIH2	9606.ENSP00000351190	Inter-alpha-trypsin inhibitor heavy chain 2; May act as a carrier of hyaluronan in serum or as a binding protein between hyaluronan and other matrix protein, including those on cell surfaces in tissues to regulate the localization, synthesis and degradation of hyaluronan which are essential to cells undergoing biological processes
Cluster_1	Blue	194	ADAMTSL3	9606.ENSP00000286744	ADAMTS-like 3
Cluster_1	Blue	194	CITED2	9606.ENSP00000356623	Cbp/p300-interacting transactivator, with Glu/Asp-rich carboxy-terminal domain, 2; Transcriptional coactivator of the p300/CBP-mediated trancription complex. Acts as a bridge, linking TFAP2 transcription factors and the p300/CBP transcriptional coactivator complex in order to stimulate TFAP2-mediated transcriptional activation. Positively regulates TGF-beta signaling through its association with …
Cluster_1	Blue	194	DDR2	9606.ENSP00000356898	Discoidin domain receptor tyrosine kinase 2; Tyrosine kinase that functions as cell surface receptor for fibrillar collagen and regulates cell differentiation, remodeling of the extracellular matrix, cell migration and cell proliferation. Required for normal bone development. Regulates osteoblast differentiation and chondrocyte maturation via a signaling pathway that involves MAP kinases and lead…
Cluster_1	Blue	194	FLRT2	9606.ENSP00000332879	Fibronectin leucine rich transmembrane protein 2; Functions in cell-cell adhesion, cell migration and axon guidance. Mediates cell-cell adhesion via its interactions with ADGRL3 and probably also other latrophilins that are expressed at the surface of adjacent cells. May play a role in the migration of cortical neurons during brain development via its interaction with UNC5D. Mediates axon growth …
Cluster_1	Blue	194	FAM47E	9606.ENSP00000409423	Family with sequence similarity 47, member E
Cluster_1	Blue	194	MAGED1	9606.ENSP00000364847	Melanoma antigen family D, 1; Involved in the apoptotic response after nerve growth factor (NGF) binding in neuronal cells. Inhibits cell cycle progression, and facilitates NGFR-mediated apoptosis. May act as a regulator of the function of DLX family members. May enhance ubiquitin ligase activity of RING-type zinc finger-containing E3 ubiquitin-protein ligases. Proposed to act through recruitment…
Cluster_1	Blue	194	KCTD16	9606.ENSP00000424151	Potassium channel tetramerisation domain containing 16; Auxiliary subunit of GABA-B receptors that determine the pharmacology and kinetics of the receptor response. Increases agonist potency and markedly alter the G-protein signaling of the receptors by accelerating onset and promoting desensitization (By similarity)
Cluster_1	Blue	194	EPHA7	9606.ENSP00000358309	EPH receptor A7; Receptor tyrosine kinase which binds promiscuously GPI- anchored ephrin-A family ligands residing on adjacent cells, leading to contact-dependent bidirectional signaling into neighboring cells. The signaling pathway downstream of the receptor is referred to as forward signaling while the signaling pathway downstream of the ephrin ligand is referred to as reverse signaling. Among …
Cluster_1	Blue	194	GCNT3	9606.ENSP00000379377	Glucosaminyl (N-acetyl) transferase 3, mucin type; Glycosyltransferase that can synthesize all known mucin beta 6 N-acetylglucosaminides. Mediates core 2 and core 4 O-glycan branching, 2 important steps in mucin-type biosynthesis. Has also I-branching enzyme activity by converting linear into branched poly-N-acetyllactosaminoglycans, leading to introduce the blood group I antigen during embryonic…
Cluster_1	Blue	194	GOLGA3	9606.ENSP00000204726	Golgin A3; Golgi auto-antigen; probably involved in maintaining Golgi structure
Cluster_1	Blue	194	EMILIN1	9606.ENSP00000369677	Elastin microfibril interfacer 1; May be responsible for anchoring smooth muscle cells to elastic fibers, and may be involved not only in the formation of the elastic fiber, but also in the processes that regulate vessel assembly. Has cell adhesive capacity
Cluster_1	Blue	194	GLIS3	9606.ENSP00000371398	GLIS family zinc finger 3; Acts as both a repressor and activator of transcription. Binds to the consensus sequence 5'-GACCACCCAC-3' (By similarity)
Cluster_1	Blue	194	ALPK2	9606.ENSP00000354991	Alpha-kinase 2; Kinase that recognizes phosphorylation sites in which the surrounding peptides have an alpha-helical conformation
Cluster_1	Blue	194	FRK	9606.ENSP00000357615	Fyn-related kinase; Non-receptor tyrosine-protein kinase that negatively regulates cell proliferation. Positively regulates PTEN protein stability through phosphorylation of PTEN on 'Tyr-336', which in turn prevents its ubiquitination and degradation, possibly by reducing its binding to NEDD4. May function as a tumor suppressor
Cluster_1	Blue	194	DLC1	9606.ENSP00000276297	Deleted in liver cancer 1; Functions as a GTPase-activating protein for the small GTPases RHOA, RHOB, RHOC and CDC42, terminating their downstream signaling. This induces morphological changes and detachment through cytoskeletal reorganization, playing a critical role in biological processes such as cell migration and proliferation. Also functions in vivo as an activator of the phospholipase PLCD…
Cluster_1	Blue	194	MUM1L1	9606.ENSP00000338641	Melanoma associated antigen (mutated) 1-like 1
Cluster_1	Blue	194	ARHGAP29	9606.ENSP00000260526	Rho GTPase activating protein 29; GTPase activator for the Rho-type GTPases by converting them to an inactive GDP-bound state. Has strong activity toward RHOA, and weaker activity toward RAC1 and CDC42. May act as a specific effector of RAP2A to regulate Rho. In concert with RASIP1, suppresses RhoA signaling and dampens ROCK and MYH9 activities in endothelial cells and plays an essential role in …
Cluster_1	Blue	194	LBH	9606.ENSP00000378733	Limb bud and heart development homolog (mouse); Transcriptional activator which may act in mitogen- activated protein kinase signaling pathway
Cluster_1	Blue	194	HERPUD1	9606.ENSP00000409555	Homocysteine-inducible, endoplasmic reticulum stress-inducible, ubiquitin-like domain member 1; Component of the endoplasmic reticulum quality control (ERQC) system also called ER-associated degradation (ERAD) involved in ubiquitin-dependent degradation of misfolded endoplasmic reticulum proteins. Could enhance presenilin-mediated beta-amyloid protein 40 generation. Binds to ubiquilins and this i…
Cluster_1	Blue	194	KIF26B	9606.ENSP00000385545	Kinesin family member 26B; Essential for embryonic kidney development. Plays an important role in the compact adhesion between mesenchymal cells adjacent to the ureteric buds, possibly by interacting with MYH10. This could lead to the establishment of the basolateral integrity of the mesenchyme and the polarized expression of ITGA8, which maintains the GDNF expression required for further ureteri…
Cluster_1	Blue	194	LPGAT1	9606.ENSP00000355963	Lysophosphatidylglycerol acyltransferase 1; Lysophosphatidylglycerol (LPG) specific acyltransferase that recognizes various acyl-CoAs and LPGs as substrates but demonstrates a clear preference for long chain saturated fatty acyl-CoAs and oleoyl-CoA as acyl donors. Prefers oleoyl-LPG over palmitoyl-LPG as an acyl receptor and oleoyl-CoA over lauroyl-CoA as an acyl donor
Cluster_1	Blue	194	CPS1	9606.ENSP00000402608	Carbamoyl-phosphate synthase 1, mitochondrial; Involved in the urea cycle of ureotelic animals where the enzyme plays an important role in removing excess ammonia from the cell
Cluster_1	Blue	194	CLN5	9606.ENSP00000366673	Ceroid-lipofuscinosis, neuronal 5
Cluster_1	Blue	194	BMPR1B	9606.ENSP00000264568	Bone morphogenetic protein receptor, type IB; On ligand binding, forms a receptor complex consisting of two type II and two type I transmembrane serine/threonine kinases. Type II receptors phosphorylate and activate type I receptors which autophosphorylate, then bind and activate SMAD transcriptional regulators. Receptor for BMP7/OP-1 and GDF5. Positively regulates chondrocyte differentiation thr…
Cluster_1	Blue	194	CGN	9606.ENSP00000271636	Cingulin; Probably plays a role in the formation and regulation of the tight junction (TJ) paracellular permeability barrier
Cluster_1	Blue	194	EHBP1	9606.ENSP00000263991	EH domain binding protein 1; May play a role in actin reorganization. Links clathrin- mediated endocytosis to the actin cytoskeleton
Cluster_1	Blue	194	MPZL1	9606.ENSP00000352513	Myelin protein zero-like 1; Cell surface receptor, which is involved in signal transduction processes. Recruits PTPN11/SHP-2 to the cell membrane and is a putative substrate of PTPN11/SHP-2. Is a major receptor for concanavalin-A (ConA) and is involved in cellular signaling induced by ConA, which probably includes Src family tyrosine- protein kinases. Isoform 3 seems to have a dominant negative r…
Cluster_1	Blue	194	DCBLD1	9606.ENSP00000296955	Discoidin, CUB and LCCL domain containing 1
Cluster_1	Blue	194	MMP16	9606.ENSP00000286614	Matrix metallopeptidase 16 (membrane-inserted); Endopeptidase that degrades various components of the extracellular matrix, such as collagen type III and fibronectin. Activates progelatinase A. Involved in the matrix remodeling of blood vessels. Isoform short cleaves fibronectin and also collagen type III, but at lower rate. It has no effect on type I, II, IV and V collagen. However, upon interac…
Cluster_1	Blue	194	BTG1	9606.ENSP00000256015	B-cell translocation gene 1, anti-proliferative; Anti-proliferative protein
Cluster_1	Blue	194	DIRC3	9606.ENSP00000389455	Disrupted in renal carcinoma 3
Cluster_1	Blue	194	FADS1	9606.ENSP00000322229	Fatty acid desaturase 1; Isoform 2 does not exhibit any catalytic activity toward 20:3n-6, but it may enhance FADS2 activity (By similarity). Isoform 1 is a component of a lipid metabolic pathway that catalyzes biosynthesis of highly unsaturated fatty acids (HUFA) from precursor essential polyunsaturated fatty acids (PUFA) linoleic acid (LA) (18:2n-6) and alpha-linolenic acid (ALA) (18:3n-3). Cat…
Cluster_1	Blue	194	ARL8B	9606.ENSP00000256496	ADP-ribosylation factor-like 8B; May play a role in lysosome motility (PubMed:16537643). May play a role in chromosome segregation (PubMed:15331635)
Cluster_1	Blue	194	CLDN11	9606.ENSP00000064724	Claudin 11; Plays a major role in tight junction-specific obliteration of the intercellular space, through calcium- independent cell-adhesion activity
Cluster_1	Blue	194	GAS7	9606.ENSP00000407552	Growth arrest-specific 7; May play a role in promoting maturation and morphological differentiation of cerebellar neurons
Cluster_1	Blue	194	CLIP4	9606.ENSP00000327009	CAP-GLY domain containing linker protein family, member 4
Cluster_1	Blue	194	AKAP17A	9606.ENSP00000324827	A kinase (PRKA) anchor protein 17A; Splice factor regulating alternative splice site selection for certain mRNA precursors. Mediates regulation of pre- mRNA splicing in a PKA-dependent manner
Cluster_1	Blue	194	CNTN5	9606.ENSP00000279463	Contactin 5; Contactins mediate cell surface interactions during nervous system development. Has some neurite outgrowth-promoting activity in the cerebral cortical neurons but not in hippocampal neurons. Probably involved in neuronal activity in the auditory system (By similarity)
Cluster_1	Blue	194	CLIP1	9606.ENSP00000303585	CAP-GLY domain containing linker protein 1; Binds to the plus end of microtubules and regulates the dynamics of the microtubule cytoskeleton. Promotes microtubule growth and microtubule bundling. Links cytoplasmic vesicles to microtubules and thereby plays an important role in intracellular vesicle trafficking. Plays a role macropinocytosis and endosome trafficking
Cluster_1	Blue	194	EBP	9606.ENSP00000417052	Emopamil binding protein (sterol isomerase); Catalyzes the conversion of Delta(8)-sterols to their corresponding Delta(7)-isomers
Cluster_1	Blue	194	CTSA	9606.ENSP00000361562	Cathepsin A; Protective protein appears to be essential for both the activity of beta-galactosidase and neuraminidase, it associates with these enzymes and exerts a protective function necessary for their stability and activity. This protein is also a carboxypeptidase and can deamidate tachykinins
Cluster_1	Blue	194	AQP1	9606.ENSP00000311165	Aquaporin 1 (Colton blood group); Forms a water-specific channel that provides the plasma membranes of red cells and kidney proximal tubules with high permeability to water, thereby permitting water to move in the direction of an osmotic gradient
Cluster_1	Blue	194	CTSL1	9606.ENSP00000345344	Cathepsin L1; Important for the overall degradation of proteins in lysosomes
Cluster_1	Blue	194	DAPK3	9606.ENSP00000301264	Death-associated protein kinase 3; Serine/threonine kinase which is involved in the regulation of apoptosis, autophagy, transcription, translation and actin cytoskeleton reorganization. Involved in the regulation of smooth muscle contraction. Regulates both type I (caspase- dependent) apoptotic and type II (caspase-independent) autophagic cell deaths signal, depending on the cellular setting. Inv…
Cluster_1	Blue	194	CACNA1D	9606.ENSP00000288139	Calcium channel, voltage-dependent, L type, alpha 1D subunit; Voltage-sensitive calcium channels (VSCC) mediate the entry of calcium ions into excitable cells and are also involved in a variety of calcium-dependent processes, including muscle contraction, hormone or neurotransmitter release, gene expression, cell motility, cell division and cell death. The isoform alpha-1D gives rise to L-type ca…
Cluster_1	Blue	194	FDPS	9606.ENSP00000349078	Farnesyl diphosphate synthase; Key enzyme in isoprenoid biosynthesis which catalyzes the formation of farnesyl diphosphate (FPP), a precursor for several classes of essential metabolites including sterols, dolichols, carotenoids, and ubiquinones. FPP also serves as substrate for protein farnesylation and geranylgeranylation. Catalyzes the sequential condensation of isopentenyl pyrophosphate with …
Cluster_1	Blue	194	ATXN1	9606.ENSP00000244769	Ataxin 1; Chromatin-binding factor that repress Notch signaling in the absence of Notch intracellular domain by acting as a CBF1 corepressor. Binds to the HEY promoter and might assist, along with NCOR2, RBPJ-mediated repression. Binds RNA in vitro. May be involved in RNA metabolism
Cluster_1	Blue	194	ECE1	9606.ENSP00000364028	Endothelin converting enzyme 1; Converts big endothelin-1 to endothelin-1
Cluster_1	Blue	194	DSP	9606.ENSP00000369129	Desmoplakin; Major high molecular weight protein of desmosomes. Involved in the organization of the desmosomal cadherin- plakoglobin complexes into discrete plasma membrane domains and in the anchoring of intermediate filaments to the desmosomes
Cluster_1	Blue	194	EPS8L2	9606.ENSP00000320828	EPS8-like 2; Stimulates guanine exchange activity of SOS1. May play a role in membrane ruffling and remodeling of the actin cytoskeleton
Cluster_1	Blue	194	HK2	9606.ENSP00000290573	Hexokinase 2
Cluster_1	Blue	194	HAPLN1	9606.ENSP00000274341	Hyaluronan and proteoglycan link protein 1; Stabilizes the aggregates of proteoglycan monomers with hyaluronic acid in the extracellular cartilage matrix
Cluster_1	Blue	194	ECM2	9606.ENSP00000344758	Extracellular matrix protein 2, female organ and adipocyte specific; Promotes matrix assembly and cell adhesiveness
Cluster_1	Blue	194	DGKI	9606.ENSP00000288490	Diacylglycerol kinase, iota
Cluster_1	Blue	194	MTUS2	9606.ENSP00000392057	Microtubule associated tumor suppressor candidate 2; Binds microtubules. Together with MAPRE1 may target the microtubule depolymerase KIF2C to the plus-end of microtubules. May regulate the dynamics of microtubules at their growing distal tip
Cluster_1	Blue	194	APPBP2	9606.ENSP00000083182	Amyloid beta precursor protein (cytoplasmic tail) binding protein 2; May play a role in intracellular protein transport. May be involved in the translocation of APP along microtubules toward the cell surface
Cluster_1	Blue	194	GPR126	9606.ENSP00000356581	G protein-coupled receptor 126; G-protein coupled receptor which is activated by type IV collagen, a major constituent of the basement membrane. Essential for normal differentiation of promyelinating Schwann cells and for normal myelination of axons
Cluster_1	Blue	194	FREM1	9606.ENSP00000370262	FRAS1 related extracellular matrix 1; Extracellular matrix protein that plays a role in epidermal differentiation and is required for epidermal adhesion during embryonic development
Cluster_1	Blue	194	HS6ST3	9606.ENSP00000365895	Heparan sulfate 6-O-sulfotransferase 3; 6-O-sulfation enzyme which catalyzes the transfer of sulfate from 3'-phosphoadenosine 5'-phosphosulfate (PAPS) to position 6 of the N-sulfoglucosamine residue (GlcNS) of heparan sulfate
Cluster_1	Blue	194	KIAA1199	9606.ENSP00000220244	KIAA1199; Mediates depolymerization of hyaluronic acid (HA) via the cell membrane-associated clathrin-coated pit endocytic pathway. Binds to hyaluronic acid. Hydrolyzes high molecular weight hyaluronic acid to produce an intermediate-sized product, a process that may occur through rapid vesicle endocytosis and recycling without intracytoplasmic accumulation or digestion in lysosomes. Involved in …
Cluster_1	Blue	194	DENND1A	9606.ENSP00000362727	DENN/MADD domain containing 1A; Guanine nucleotide exchange factor (GEF) regulating clathrin-mediated endocytosis through RAB35 activation. Promotes the exchange of GDP to GTP, converting inactive GDP-bound RAB35 into its active GTP-bound form. Regulates clathrin-mediated endocytosis of synaptic vesicles and mediates exit from early endosomes (PubMed:20154091, PubMed:20937701). Binds phosphatidyl…
Cluster_1	Blue	194	COBLL1	9606.ENSP00000341360	COBL-like 1
Cluster_1	Blue	194	ABAT	9606.ENSP00000268251	4-aminobutyrate aminotransferase; Catalyzes the conversion of gamma-aminobutyrate and L- beta-aminoisobutyrate to succinate semialdehyde and methylmalonate semialdehyde, respectively. Can also convert delta-aminovalerate and beta-alanine
Cluster_1	Blue	194	ADAMTS6	9606.ENSP00000370443	ADAM metallopeptidase with thrombospondin type 1 motif, 6
Cluster_1	Blue	194	CLDN4	9606.ENSP00000342445	Claudin 4; Plays a major role in tight junction-specific obliteration of the intercellular space
Cluster_1	Blue	194	FBLN5	9606.ENSP00000345008	Fibulin 5; Essential for elastic fiber formation, is involved in the assembly of continuous elastin (ELN) polymer and promotes the interaction of microfibrils and ELN (PubMed:18185537). Stabilizes and organizes elastic fibers in the skin, lung and vasculature (By similarity). Promotes adhesion of endothelial cells through interaction of integrins and the RGD motif. Vascular ligand for integrin re…
Cluster_1	Blue	194	ACTC1	9606.ENSP00000290378	Actin, alpha, cardiac muscle 1; Actins are highly conserved proteins that are involved in various types of cell motility and are ubiquitously expressed in all eukaryotic cells
Cluster_1	Blue	194	MATN2	9606.ENSP00000430487	Matrilin 2; Involved in matrix assembly
Cluster_1	Blue	194	CNTN4	9606.ENSP00000380602	Contactin 4; Contactins mediate cell surface interactions during nervous system development. Has some neurite outgrowth-promoting activity. May be involved in synaptogenesis
Cluster_1	Blue	194	LAYN	9606.ENSP00000364764	Layilin; Receptor for hyaluronate
Cluster_1	Blue	194	HMGCR	9606.ENSP00000287936	3-hydroxy-3-methylglutaryl-CoA reductase; Transmembrane glycoprotein that is the rate-limiting enzyme in cholesterol biosynthesis as well as in the biosynthesis of nonsterol isoprenoids that are essential for normal cell function including ubiquinone and geranylgeranyl proteins
Cluster_1	Blue	194	HYAL1	9606.ENSP00000266031	Hyaluronoglucosaminidase 1; May have a role in promoting tumor progression. May block the TGFB1-enhanced cell growth
Cluster_1	Blue	194	ADAM33	9606.ENSP00000348912	ADAM metallopeptidase domain 33
Cluster_1	Blue	194	CILP	9606.ENSP00000261883	Cartilage intermediate layer protein, nucleotide pyrophosphohydrolase; Probably plays a role in cartilage scaffolding. May act by antagonizing TGF-beta1 (TGFB1) and IGF1 functions. Has the ability to suppress IGF1-induced proliferation and sulfated proteoglycan synthesis, and inhibits ligand-induced IGF1R autophosphorylation. May inhibit TGFB1-mediated induction of cartilage matrix genes via its …
Cluster_1	Blue	194	ACADVL	9606.ENSP00000349297	acyl-CoA dehydrogenase, very long chain; Active toward esters of long-chain and very long chain fatty acids such as palmitoyl-CoA, mysritoyl-CoA and stearoyl-CoA. Can accommodate substrate acyl chain lengths as long as 24 carbons, but shows little activity for substrates of less than 12 carbons
Cluster_1	Blue	194	FMO5	9606.ENSP00000254090	Flavin containing monooxygenase 5; In contrast with other forms of FMO it does not seem to be a drug-metabolizing enzyme
Cluster_1	Blue	194	KDM3A	9606.ENSP00000323659	Lysine (K)-specific demethylase 3A; Histone demethylase that specifically demethylates 'Lys- 9' of histone H3, thereby playing a central role in histone code. Preferentially demethylates mono- and dimethylated H3 'Lys-9' residue, with a preference for dimethylated residue, while it has weak or no activity on trimethylated H3 'Lys-9'. Demethylation of Lys residue generates formaldehyde and succina…
Cluster_1	Blue	194	ACSS2	9606.ENSP00000253382	acyl-CoA synthetase short-chain family member 2; Activates acetate so that it can be used for lipid synthesis or for energy generation
Cluster_1	Blue	194	EFEMP2	9606.ENSP00000309953	EGF containing fibulin-like extracellular matrix protein 2
Cluster_1	Blue	194	MLLT3	9606.ENSP00000369695	Myeloid/lymphoid or mixed-lineage leukemia (trithorax homolog, Drosophila); translocated to, 3; Component of the super elongation complex (SEC), a complex required to increase the catalytic rate of RNA polymerase II transcription by suppressing transient pausing by the polymerase at multiple sites along the DNA
Cluster_1	Blue	194	ARMCX3	9606.ENSP00000340672	Armadillo repeat containing, X-linked 3
Cluster_1	Blue	194	KCTD8	9606.ENSP00000353129	Potassium channel tetramerisation domain containing 8; Auxiliary subunit of GABA-B receptors that determine the pharmacology and kinetics of the receptor response. Increases agonist potency and markedly alter the G-protein signaling of the receptors by accelerating onset and promoting desensitization (By similarity)
Cluster_1	Blue	194	LIFR	9606.ENSP00000263409	Leukemia inhibitory factor receptor alpha; Signal-transducing molecule. May have a common pathway with IL6ST. The soluble form inhibits the biological activity of LIF by blocking its binding to receptors on target cells
Cluster_1	Blue	194	APOE	9606.ENSP00000252486	Apolipoprotein E; Mediates the binding, internalization, and catabolism of lipoprotein particles. It can serve as a ligand for the LDL (apo B/E) receptor and for the specific apo-E receptor (chylomicron remnant) of hepatic tissues
Cluster_1	Blue	194	ARHGAP6	9606.ENSP00000338967	Rho GTPase activating protein 6; GTPase activator for the Rho-type GTPases by converting them to an inactive GDP-bound state. Could regulate the interactions of signaling molecules with the actin cytoskeleton. Promotes continuous elongation of cytoplasmic processes during cell motility and simultaneous retraction of the cell body changing the cell morphology
Cluster_1	Blue	194	IDI1	9606.ENSP00000370748	Isopentenyl-diphosphate delta isomerase 1; Catalyzes the 1,3-allylic rearrangement of the homoallylic substrate isopentenyl (IPP) to its highly electrophilic allylic isomer, dimethylallyl diphosphate (DMAPP)
Cluster_1	Blue	194	ATP7B	9606.ENSP00000242839	ATPase, Cu++ transporting, beta polypeptide; Involved in the export of copper out of the cells, such as the efflux of hepatic copper into the bile
Cluster_1	Blue	194	ELF1	9606.ENSP00000239882	E74-like factor 1 (ets domain transcription factor); Transcription factor that activates the LYN and BLK promoters. Appears to be required for the T-cell-receptor-mediated trans activation of HIV-2 gene expression. Binds specifically to two purine-rich motifs in the HIV-2 enhancer
Cluster_1	Blue	194	EDEM2	9606.ENSP00000363616	ER degradation enhancer, mannosidase alpha-like 2; Initiates the endoplasmic reticulum-associated degradation (ERAD) that targets misfolded glycoproteins for degradation in an N-glycan-dependent manner. Catalyzes the first mannose trimming step, from Man9GlcNAc2 to Man8GlcNAc2 (PubMed:25092655). Extracts misfolded glycoproteins, but not glycoproteins undergoing productive folding, from the calnex…
Cluster_1	Blue	194	CMPK1	9606.ENSP00000360939	Cytidine monophosphate (UMP-CMP) kinase 1, cytosolic; Catalyzes the phosphorylation of pyrimidine nucleoside monophosphates at the expense of ATP. Plays an important role in de novo pyrimidine nucleotide biosynthesis. Has preference for UMP and CMP as phosphate acceptors. Also displays broad nucleoside diphosphate kinase activity
Cluster_1	Blue	194	EGFLAM	9606.ENSP00000346964	EGF-like, fibronectin type III and laminin G domains; Involved in both the retinal photoreceptor ribbon synapse formation and physiological functions of visual perception. Necessary for proper bipolar dendritic tip apposition to the photoreceptor ribbon synapse. Promotes matrix assembly and cell adhesiveness (By similarity)
Cluster_1	Blue	194	ABCA1	9606.ENSP00000363868	ATP-binding cassette, sub-family A (ABC1), member 1; cAMP-dependent and sulfonylurea-sensitive anion transporter. Key gatekeeper influencing intracellular cholesterol transport
Cluster_1	Blue	194	MME	9606.ENSP00000353679	Membrane metallo-endopeptidase; Thermolysin-like specificity, but is almost confined on acting on polypeptides of up to 30 amino acids (PubMed:15283675, PubMed:8168535). Biologically important in the destruction of opioid peptides such as Met- and Leu-enkephalins by cleavage of a Gly-Phe bond (PubMed:17101991). Able to cleave angiotensin-1, angiotensin-2 and angiotensin 1-9 (PubMed:15283675). Inv…
Cluster_1	Blue	194	GBF1	9606.ENSP00000359000	Golgi brefeldin A resistant guanine nucleotide exchange factor 1; Guanine-nucleotide exchange factor (GEF) for members of the Arf family of small GTPases involved in trafficking in the early secretory pathway; its GEF activity initiates the coating of nascent vesicles via the localized generation of activated ARFs through replacement of GDP with GTP. Recruitment to cis-Golgi membranes requires me…
Cluster_1	Blue	194	DHX32	9606.ENSP00000284690	DEAH (Asp-Glu-Ala-His) box polypeptide 32
Cluster_1	Blue	194	AMBP	9606.ENSP00000265132	Alpha-1-microglobulin/bikunin precursor; Inter-alpha-trypsin inhibitor inhibits trypsin, plasmin, and lysosomal granulocytic elastase. Inhibits calcium oxalate crystallization
Cluster_1	Blue	194	IGFBP5	9606.ENSP00000233813	Insulin-like growth factor binding protein 5; IGF-binding proteins prolong the half-life of the IGFs and have been shown to either inhibit or stimulate the growth promoting effects of the IGFs on cell culture. They alter the interaction of IGFs with their cell surface receptors
Cluster_1	Blue	194	CCDC68	9606.ENSP00000337209	Coiled-coil domain containing 68
Cluster_1	Blue	194	ARID5B	9606.ENSP00000279873	AT rich interactive domain 5B (MRF1-like); Transcription coactivator that binds to the 5'-AATA[CT]- 3' core sequence and plays a key role in adipogenesis and liver development. Acts by forming a complex with phosphorylated PHF2, which mediates demethylation at Lys-336, leading to target the PHF2-ARID5B complex to target promoters, where PHF2 mediates demethylation of dimethylated 'Lys-9' of histo…
Cluster_1	Blue	194	ARHGEF3	9606.ENSP00000341071	Rho guanine nucleotide exchange factor (GEF) 3; Acts as guanine nucleotide exchange factor (GEF) for RhoA and RhoB GTPases
Cluster_1	Blue	194	GPR146	9606.ENSP00000297468	G protein-coupled receptor 146; Orphan receptor
Cluster_1	Blue	194	CHIC2	9606.ENSP00000263921	Cysteine-rich hydrophobic domain 2
Cluster_1	Blue	194	MYO1C	9606.ENSP00000352834	Myosin IC; Myosins are actin-based motor molecules with ATPase activity. Unconventional myosins serve in intracellular movements. Their highly divergent tails are presumed to bind to membranous compartments, which would be moved relative to actin filaments. Involved in glucose transporter recycling in response to insulin by regulating movement of intracellular GLUT4-containing vesicles to the pla…
Cluster_1	Blue	194	CFI	9606.ENSP00000378130	Complement factor I; Responsible for cleaving the alpha-chains of C4b and C3b in the presence of the cofactors C4-binding protein and factor H respectively
Cluster_1	Blue	194	EPHA6	9606.ENSP00000374323	EPH receptor A6; Receptor tyrosine kinase which binds promiscuously GPI- anchored ephrin-A family ligands residing on adjacent cells, leading to contact-dependent bidirectional signaling into neighboring cells. The signaling pathway downstream of the receptor is referred to as forward signaling while the signaling pathway downstream of the ephrin ligand is referred to as reverse signaling (By sim…
Cluster_1	Blue	194	MTUS1	9606.ENSP00000262102	Microtubule associated tumor suppressor 1; Cooperates with AGTR2 to inhibit ERK2 activation and cell proliferation. May be required for AGTR2 cell surface expression. Together with PTPN6, induces UBE2V2 expression upon angiotensin-II stimulation. Isoform 1 inhibits breast cancer cell proliferation, delays the progression of mitosis by prolonging metaphase and reduces tumor growth
Cluster_1	Blue	194	CSGALNACT1	9606.ENSP00000310891	Chondroitin sulfate N-acetylgalactosaminyltransferase 1; Transfers 1,4-N-acetylgalactosamine (GalNAc) from UDP- GalNAc to the non-reducing end of glucuronic acid (GlcUA). Required for addition of the first GalNAc to the core tetrasaccharide linker and for elongation of chondroitin chains. Important role in chondroitin chain biosynthesis in cartilage formation and subsequent endochondral ossificat…
Cluster_1	Blue	194	CADM1	9606.ENSP00000395359	Cell adhesion molecule 1; Mediates homophilic cell-cell adhesion in a Ca(2+)- independent manner. Also mediates heterophilic cell-cell adhesion with CADM3 and NECTIN3 in a Ca(2+)-independent manner. Acts as a tumor suppressor in non-small-cell lung cancer (NSCLC) cells. Interaction with CRTAM promotes natural killer (NK) cell cytotoxicity and interferon-gamma (IFN-gamma) secretion by CD8+ cells i…
Cluster_1	Blue	194	BAMBI	9606.ENSP00000364683	BMP and activin membrane-bound inhibitor homolog (Xenopus laevis); Negatively regulates TGF-beta signaling
Cluster_1	Blue	194	CEP120	9606.ENSP00000303058	Centrosomal protein 120kDa; Plays a role in the microtubule-dependent coupling of the nucleus and the centrosome. Involved in the processes that regulate centrosome-mediated interkinetic nuclear migration (INM) of neural progenitors and for proper positioning of neurons during brain development. Also implicated in the migration and selfrenewal of neural progenitors. May play a role in centriole d…
Cluster_1	Blue	194	EDEM1	9606.ENSP00000256497	ER degradation enhancer, mannosidase alpha-like 1; Extracts misfolded glycoproteins, but not glycoproteins undergoing productive folding, from the calnexin cycle. It is directly involved in endoplasmic reticulum-associated degradation (ERAD) and targets misfolded glycoproteins for degradation in an N-glycan-independent manner, probably by forming a complex with SEL1L. It has low mannosidase activ…
Cluster_1	Blue	194	LMOD1	9606.ENSP00000356257	Leiomodin 1 (smooth muscle)
Cluster_1	Blue	194	MTSS1	9606.ENSP00000429064	Metastasis suppressor 1; May be related to cancer progression or tumor metastasis in a variety of organ sites, most likely through an interaction with the actin cytoskeleton
Cluster_1	Blue	194	GRIP1	9606.ENSP00000381098	Glutamate receptor interacting protein 1; May play a role as a localized scaffold for the assembly of a multiprotein signaling complex and as mediator of the trafficking of its binding partners at specific subcellular location in neurons
Cluster_1	Blue	194	DCAF6	9606.ENSP00000356814	DDB1 and CUL4 associated factor 6; Ligand-dependent coactivator of nuclear receptors. Enhance transcriptional activity of the nuclear receptors NR3C1 and AR. May function as a substrate receptor for CUL4-DDB1 E3 ubiquitin-protein ligase complex
Cluster_1	Blue	194	ENC1	9606.ENSP00000306356	Ectodermal-neural cortex 1 (with BTB-like domain); Actin-binding protein involved in the regulation of neuronal process formation and in differentiation of neural crest cells. Down-regulates transcription factor NF2L2/NRF2 by decreasing the rate of protein synthesis and not via a ubiquitin- mediated proteasomal degradation mechanism
Cluster_1	Blue	194	CPEB2	9606.ENSP00000443985	Cytoplasmic polyadenylation element binding protein 2; May play a role in translational regulation of stored mRNAs in transcriptionally inactive haploid spermatids. Binds to poly(U) RNA oligomers (By similarity)
Cluster_1	Blue	194	FAM46A	9606.ENSP00000318298	Family with sequence similarity 46, member A
Cluster_1	Blue	194	CAST	9606.ENSP00000379157	Calpastatin
Cluster_1	Blue	194	ASRGL1	9606.ENSP00000301776	Asparaginase like 1; Has both L-asparaginase and beta-aspartyl peptidase activity. May be involved in the production of L-aspartate, which can act as an excitatory neurotransmitter in some brain regions. Is highly active with L-Asp beta-methyl ester. Besides, has catalytic activity toward beta-aspartyl dipeptides and their methyl esters, including beta-L-Asp-L-Phe, beta-L-Asp-L-Phe methyl ester (…
Cluster_1	Blue	194	DDIT4	9606.ENSP00000307305	DNA-damage-inducible transcript 4; Regulates cell growth, proliferation and survival via inhibition of the activity of the mammalian target of rapamycin complex 1 (mTORC1). Inhibition of mTORC1 is mediated by a pathway that involves DDIT4/REDD1, AKT1, the TSC1-TSC2 complex and the GTPase RHEB. Plays an important role in responses to cellular energy levels and cellular stress, including responses …
Cluster_1	Blue	194	KLF3	9606.ENSP00000261438	Kruppel-like factor 3 (basic); Binds to the CACCC box of erythroid cell-expressed genes. May play a role in hematopoiesis (By similarity)
Cluster_1	Blue	194	CREG1	9606.ENSP00000359540	Cellular repressor of E1A-stimulated genes 1; May contribute to the transcriptional control of cell growth and differentiation. Antagonizes transcriptional activation and cellular transformation by the adenovirus E1A protein. The transcriptional control activity of cell growth requires interaction with IGF2R
Cluster_1	Blue	194	ITPKA	9606.ENSP00000260386	Inositol-trisphosphate 3-kinase A
Cluster_1	Blue	194	CPEB4	9606.ENSP00000265085	Cytoplasmic polyadenylation element binding protein 4
Cluster_1	Blue	194	FAM107B	9606.ENSP00000181796	Family with sequence similarity 107, member B
Cluster_1	Blue	194	CDR1	9606.ENSP00000359563	Cerebellar degeneration-related protein 1, 34kDa
Cluster_1	Blue	194	LMCD1	9606.ENSP00000157600	LIM and cysteine-rich domains 1; Transcriptional cofactor that restricts GATA6 function by inhibiting DNA-binding, resulting in repression of GATA6 transcriptional activation of downstream target genes. Represses GATA6-mediated trans activation of lung- and cardiac tissue- specific promoters. Inhibits DNA-binding by GATA4 and GATA1 to the cTNC promoter (By similarity). Plays a critical role in th…
Cluster_1	Blue	194	MORC4	9606.ENSP00000347821	MORC family CW-type zinc finger 4
Cluster_1	Blue	194	IKBIP	9606.ENSP00000299157	IKBKB interacting protein
Cluster_1	Blue	194	MMD	9606.ENSP00000262065	Monocyte to macrophage differentiation-associated; Involved in the dynamics of lysosomal membranes associated with microglial activation following brain lesion
Cluster_1	Blue	194	ARHGAP24	9606.ENSP00000378611	Rho GTPase activating protein 24; Rho GTPase-activating protein involved in cell polarity, cell morphology and cytoskeletal organization. Acts as a GTPase activator for the Rac-type GTPase by converting it to an inactive GDP-bound state. Controls actin remodeling by inactivating Rac downstream of Rho leading to suppress leading edge protrusion and promotes cell retraction to achieve cellular pola…
Cluster_1	Blue	194	CD248	9606.ENSP00000308117	CD248 molecule, endosialin; May play a role in tumor angiogenesis
Cluster_1	Blue	194	INPP4B	9606.ENSP00000262992	Inositol polyphosphate-4-phosphatase, type II, 105kDa; Catalyzes the hydrolysis of the 4-position phosphate of phosphatidylinositol 3,4-bisphosphate, inositol 1,3,4- trisphosphate and inositol 1,4-bisphosphate
Cluster_2	Cyan	22	F2	9606.ENSP00000308541	Coagulation factor II (thrombin); Thrombin, which cleaves bonds after Arg and Lys, converts fibrinogen to fibrin and activates factors V, VII, VIII, XIII, and, in complex with thrombomodulin, protein C. Functions in blood homeostasis, inflammation and wound healing
Cluster_2	Cyan	22	ADAM12	9606.ENSP00000357668	ADAM metallopeptidase domain 12; Involved in skeletal muscle regeneration, specifically at the onset of cell fusion. Also involved in macrophage-derived giant cells (MGC) and osteoclast formation from mononuclear precursors (By similarity)
Cluster_2	Cyan	22	GNAI1	9606.ENSP00000343027	Guanine nucleotide binding protein (G protein), alpha inhibiting activity polypeptide 1; Guanine nucleotide-binding proteins (G proteins) function as transducers downstream of G protein-coupled receptors (GPCRs) in numerous signaling cascades. The alpha chain contains the guanine nucleotide binding site and alternates between an active, GTP-bound state and an inactive, GDP-bound state. Signaling …
Cluster_2	Cyan	22	CFTR	9606.ENSP00000003084	Cystic fibrosis transmembrane conductance regulator (ATP-binding cassette sub-family C, member 7); Involved in the transport of chloride ions. May regulate bicarbonate secretion and salvage in epithelial cells by regulating the SLC4A7 transporter. Can inhibit the chloride channel activity of ANO1. Plays a role in the chloride and bicarbonate homeostasis during sperm epididymal maturation and capa…
Cluster_2	Cyan	22	CTGF	9606.ENSP00000356954	Connective tissue growth factor; Major connective tissue mitoattractant secreted by vascular endothelial cells. Promotes proliferation and differentiation of chondrocytes. Mediates heparin- and divalent cation-dependent cell adhesion in many cell types including fibroblasts, myofibroblasts, endothelial and epithelial cells. Enhances fibroblast growth factor-induced DNA synthesis
Cluster_2	Cyan	22	CTSD	9606.ENSP00000236671	Cathepsin D; Acid protease active in intracellular protein breakdown. Involved in the pathogenesis of several diseases such as breast cancer and possibly Alzheimer disease
Cluster_2	Cyan	22	CDH17	9606.ENSP00000027335	Cadherin 17, LI cadherin (liver-intestine); Cadherins are calcium-dependent cell adhesion proteins. They preferentially interact with themselves in a homophilic manner in connecting cells; cadherins may thus contribute to the sorting of heterogeneous cell types. LI-cadherin may have a role in the morphological organization of liver and intestine. Involved in intestinal peptide transport
Cluster_2	Cyan	22	CEACAM1	9606.ENSP00000161559	Carcinoembryonic antigen-related cell adhesion molecule 1 (biliary glycoprotein)
Cluster_2	Cyan	22	CBLB	9606.ENSP00000264122	Cbl proto-oncogene, E3 ubiquitin protein ligase B; E3 ubiquitin-protein ligase which accepts ubiquitin from specific E2 ubiquitin-conjugating enzymes, and transfers it to substrates, generally promoting their degradation by the proteasome. Negatively regulates TCR (T-cell receptor), BCR (B- cell receptor) and FCER1 (high affinity immunoglobulin epsilon receptor) signal transduction pathways. In n…
Cluster_2	Cyan	22	CLTB	9606.ENSP00000309415	Clathrin, light chain B; Clathrin is the major protein of the polyhedral coat of coated pits and vesicles
Cluster_2	Cyan	22	EGFR	9606.ENSP00000275493	Epidermal growth factor receptor; Receptor tyrosine kinase binding ligands of the EGF family and activating several signaling cascades to convert extracellular cues into appropriate cellular responses. Known ligands include EGF, TGFA/TGF-alpha, amphiregulin, epigen/EPGN, BTC/betacellulin, epiregulin/EREG and HBEGF/heparin-binding EGF. Ligand binding triggers receptor homo- and/or heterodimerizati…
Cluster_2	Cyan	22	MGMT	9606.ENSP00000302111	O-6-methylguanine-DNA methyltransferase; Involved in the cellular defense against the biological effects of O6-methylguanine (O6-MeG) in DNA. Repairs alkylated guanine in DNA by stoichiometrically transferring the alkyl group at the O-6 position to a cysteine residue in the enzyme. This is a suicide reaction: the enzyme is irreversibly inactivated
Cluster_2	Cyan	22	KRT8	9606.ENSP00000293308	Keratin 8; Together with KRT19, helps to link the contractile apparatus to dystrophin at the costameres of striated muscle
Cluster_2	Cyan	22	CTNND2	9606.ENSP00000307134	Catenin (cadherin-associated protein), delta 2; Has a critical role in neuronal development, particularly in the formation and/or maintenance of dendritic spines and synapses (PubMed:25807484). Involved in the regulation of Wnt signaling (PubMed:25807484). It probably acts on beta- catenin turnover, facilitating beta-catenin interaction with GSK3B, phosphorylation, ubiquitination and degradation …
Cluster_2	Cyan	22	EPS8	9606.ENSP00000281172	Epidermal growth factor receptor pathway substrate 8; Signaling adapter that controls various cellular protrusions by regulating actin cytoskeleton dynamics and architecture. Depending on its association with other signal transducers, can regulate different processes. Together with SOS1 and ABI1, forms a trimeric complex that participates in transduction of signals from Ras to Rac by activating t…
Cluster_2	Cyan	22	DCN	9606.ENSP00000052754	Decorin; May affect the rate of fibrils formation
Cluster_2	Cyan	22	KRT19	9606.ENSP00000355124	Keratin 19; Involved in the organization of myofibers. Together with KRT8, helps to link the contractile apparatus to dystrophin at the costameres of striated muscle
Cluster_2	Cyan	22	BIN1	9606.ENSP00000316779	Bridging integrator 1; May be involved in regulation of synaptic vesicle endocytosis. May act as a tumor suppressor and inhibits malignant cell transformation
Cluster_2	Cyan	22	HPGD	9606.ENSP00000296522	Hydroxyprostaglandin dehydrogenase 15-(NAD); Prostaglandin inactivation. Contributes to the regulation of events that are under the control of prostaglandin levels. Catalyzes the NAD-dependent dehydrogenation of lipoxin A4 to form 15-oxo-lipoxin A4. Inhibits in vivo proliferation of colon cancer cells
Cluster_2	Cyan	22	IRS1	9606.ENSP00000304895	Insulin receptor substrate 1; May mediate the control of various cellular processes by insulin. When phosphorylated by the insulin receptor binds specifically to various cellular proteins containing SH2 domains such as phosphatidylinositol 3-kinase p85 subunit or GRB2. Activates phosphatidylinositol 3-kinase when bound to the regulatory p85 subunit (By similarity)
Cluster_2	Cyan	22	BMP4	9606.ENSP00000245451	Bone morphogenetic protein 4; Induces cartilage and bone formation. Also act in mesoderm induction, tooth development, limb formation and fracture repair. Acts in concert with PTHLH/PTHRP to stimulate ductal outgrowth during embryonic mammary development and to inhibit hair follicle induction (By similarity)
Cluster_2	Cyan	22	JAK1	9606.ENSP00000343204	Janus kinase 1; Tyrosine kinase of the non-receptor type, involved in the IFN-alpha/beta/gamma signal pathway (PubMed:7615558). Kinase partner for the interleukin (IL)-2 receptor (PubMed:11909529)
Cluster_3	Yellow	16	COL27A1	9606.ENSP00000348385	Collagen, type XXVII, alpha 1; Plays a role during the calcification of cartilage and the transition of cartilage to bone
Cluster_3	Yellow	16	GBE1	9606.ENSP00000410833	Glucan (1,4-alpha-), branching enzyme 1; Required for sufficient glycogen accumulation. The alpha 1-6 branches of glycogen play an important role in increasing the solubility of the molecule and, consequently, in reducing the osmotic pressure within cells
Cluster_3	Yellow	16	COL16A1	9606.ENSP00000362776	Collagen, type XVI, alpha 1; Involved in mediating cell attachment and inducing integrin-mediated cellular reactions, such as cell spreading and alterations in cell morphology
Cluster_3	Yellow	16	COL4A2	9606.ENSP00000353654	Collagen, type IV, alpha 2; Type IV collagen is the major structural component of glomerular basement membranes (GBM), forming a 'chicken-wire' meshwork together with laminins, proteoglycans and entactin/nidogen
Cluster_3	Yellow	16	CTHRC1	9606.ENSP00000330523	Collagen triple helix repeat containing 1; May act as a negative regulator of collagen matrix deposition
Cluster_3	Yellow	16	COL14A1	9606.ENSP00000297848	Collagen, type XIV, alpha 1; Plays an adhesive role by integrating collagen bundles. It is probably associated with the surface of interstitial collagen fibrils via COL1. The COL2 domain may then serve as a rigid arm which sticks out from the fibril and protrudes the large N-terminal globular domain into the extracellular space, where it might interact with other matrix molecules or cell surface …
Cluster_3	Yellow	16	COL6A1	9606.ENSP00000355180	Collagen, type VI, alpha 1; Collagen VI acts as a cell-binding protein
Cluster_3	Yellow	16	ADAMTS2	9606.ENSP00000251582	ADAM metallopeptidase with thrombospondin type 1 motif, 2; Cleaves the propeptides of type I and II collagen prior to fibril assembly. Does not act on type III collagen. May also play a role in development that is independent of its role in collagen biosynthesis
Cluster_3	Yellow	16	COL4A6	9606.ENSP00000361290	Collagen, type IV, alpha 6; Type IV collagen is the major structural component of glomerular basement membranes (GBM), forming a 'chicken-wire' meshwork together with laminins, proteoglycans and entactin/nidogen
Cluster_3	Yellow	16	COL5A2	9606.ENSP00000364000	Collagen, type V, alpha 2; Type V collagen is a member of group I collagen (fibrillar forming collagen). It is a minor connective tissue component of nearly ubiquitous distribution. Type V collagen binds to DNA, heparan sulfate, thrombospondin, heparin, and insulin. Type V collagen is a key determinant in the assembly of tissue- specific matrices (By similarity)
Cluster_3	Yellow	16	COL15A1	9606.ENSP00000364140	Collagen, type XV, alpha 1; Structural protein that stabilizes microvessels and muscle cells, both in heart and in skeletal muscle
Cluster_3	Yellow	16	COL12A1	9606.ENSP00000325146	Collagen, type XII, alpha 1; Type XII collagen interacts with type I collagen- containing fibrils, the COL1 domain could be associated with the surface of the fibrils, and the COL2 and NC3 domains may be localized in the perifibrillar matrix
Cluster_3	Yellow	16	COL11A1	9606.ENSP00000359114	Collagen, type XI, alpha 1; May play an important role in fibrillogenesis by controlling lateral growth of collagen II fibrils
Cluster_3	Yellow	16	CDH11	9606.ENSP00000268603	Cadherin 11, type 2, OB-cadherin (osteoblast); Cadherins are calcium-dependent cell adhesion proteins. They preferentially interact with themselves in a homophilic manner in connecting cells; cadherins may thus contribute to the sorting of heterogeneous cell types
Cluster_3	Yellow	16	COL21A1	9606.ENSP00000244728	Collagen, type XXI, alpha 1
Cluster_3	Yellow	16	COL4A1	9606.ENSP00000364979	Collagen, type IV, alpha 1; Type IV collagen is the major structural component of glomerular basement membranes (GBM), forming a 'chicken-wire' meshwork together with laminins, proteoglycans and entactin/nidogen
Cluster_4	Green	14	ITGB6	9606.ENSP00000283249	Integrin, beta 6; Integrin alpha-V/beta-6 is a receptor for fibronectin and cytotactin. It recognizes the sequence R-G-D in its ligands. Internalisation of integrin alpha-V/beta-6 via clathrin-mediated endocytosis promotes carcinoma cell invasion
Cluster_4	Green	14	LAMC3	9606.ENSP00000354360	Laminin, gamma 3; Binding to cells via a high affinity receptor, laminin is thought to mediate the attachment, migration and organization of cells into tissues during embryonic development by interacting with other extracellular matrix components
Cluster_4	Green	14	FBN2	9606.ENSP00000262464	Fibrillin 2; Fibrillins are structural components of 10-12 nm extracellular calcium-binding microfibrils, which occur either in association with elastin or in elastin-free bundles. Fibrillin-2- containing microfibrils regulate the early process of elastic fiber assembly. Regulates osteoblast maturation by controlling TGF-beta bioavailability and calibrating TGF-beta and BMP levels, respectively (…
Cluster_4	Green	14	ITGA8	9606.ENSP00000367316	Integrin, alpha 8; Integrin alpha-8/beta-1 functions in the genesis of kidney and probably of other organs by regulating the recruitment of mesenchymal cells into epithelial structures. It recognizes the sequence R-G-D in a wide array of ligands including TNC, FN1, SPP1 TGFB1, TGFB3 and VTN. NPNT is probably its functional ligand in kidney genesis. Neuronal receptor for TNC it mediates cell-cell …
Cluster_4	Green	14	ITGA1	9606.ENSP00000282588	Integrin, alpha 1; Integrin alpha-1/beta-1 is a receptor for laminin and collagen. It recognizes the proline-hydroxylated sequence G-F-P-G- E-R in collagen. Involved in anchorage-dependent, negative regulation of EGF-stimulated cell growth
Cluster_4	Green	14	F2R	9606.ENSP00000321326	Coagulation factor II (thrombin) receptor; High affinity receptor for activated thrombin coupled to G proteins that stimulate phosphoinositide hydrolysis. May play a role in platelets activation and in vascular development
Cluster_4	Green	14	CYR61	9606.ENSP00000398736	Cysteine-rich, angiogenic inducer, 61; Promotes cell proliferation, chemotaxis, angiogenesis and cell adhesion. Appears to play a role in wound healing by up- regulating, in skin fibroblasts, the expression of a number of genes involved in angiogenesis, inflammation and matrix remodeling including VEGA-A, VEGA-C, MMP1, MMP3, TIMP1, uPA, PAI-1 and integrins alpha-3 and alpha-5. CYR61-mediated gene…
Cluster_4	Green	14	FLNC	9606.ENSP00000327145	Filamin C, gamma; Muscle-specific filamin, which plays a central role in muscle cells, probably by functioning as a large actin-cross- linking protein. May be involved in reorganizing the actin cytoskeleton in response to signaling events, and may also display structural functions at the Z lines in muscle cells. Critical for normal myogenesis and for maintaining the structural integrity of the mu…
Cluster_4	Green	14	LRP1	9606.ENSP00000243077	Low density lipoprotein receptor-related protein 1; Endocytic receptor involved in endocytosis and in phagocytosis of apoptotic cells. Required for early embryonic development. Involved in cellular lipid homeostasis. Involved in the plasma clearance of chylomicron remnants and activated LRPAP1 (alpha 2-macroglobulin), as well as the local metabolism of complexes between plasminogen activators and…
Cluster_4	Green	14	LAMB2	9606.ENSP00000307156	Laminin, beta 2 (laminin S); Binding to cells via a high affinity receptor, laminin is thought to mediate the attachment, migration and organization of cells into tissues during embryonic development by interacting with other extracellular matrix components
Cluster_4	Green	14	LAMC1	9606.ENSP00000258341	Laminin, gamma 1 (formerly LAMB2); Binding to cells via a high affinity receptor, laminin is thought to mediate the attachment, migration and organization of cells into tissues during embryonic development by interacting with other extracellular matrix components
Cluster_4	Green	14	LAMA1	9606.ENSP00000374309	Laminin, alpha 1; Binding to cells via a high affinity receptor, laminin is thought to mediate the attachment, migration and organization of cells into tissues during embryonic development by interacting with other extracellular matrix components
Cluster_4	Green	14	LAMA3	9606.ENSP00000324532	Laminin, alpha 3; Binding to cells via a high affinity receptor, laminin is thought to mediate the attachment, migration and organization of cells into tissues during embryonic development by interacting with other extracellular matrix components
Cluster_4	Green	14	ITGAV	9606.ENSP00000261023	Integrin, alpha V; The alpha-V (ITGAV) integrins are receptors for vitronectin, cytotactin, fibronectin, fibrinogen, laminin, matrix metalloproteinase-2, osteopontin, osteomodulin, prothrombin, thrombospondin and vWF. They recognize the sequence R-G-D in a wide array of ligands
Cluster_5	Red	14	JUN	9606.ENSP00000360266	Jun proto-oncogene; Transcription factor that recognizes and binds to the enhancer heptamer motif 5'-TGA[CG]TCA-3'. Promotes activity of NR5A1 when phosphorylated by HIPK3 leading to increased steroidogenic gene expression upon cAMP signaling pathway stimulation. Involved in activated KRAS-mediated transcriptional activation of USP28 in colorectal cancer (CRC) cells (PubMed:24623306). Binds to th…
Cluster_5	Red	14	MMP2	9606.ENSP00000219070	Matrix metallopeptidase 2 (gelatinase A, 72kDa gelatinase, 72kDa type IV collagenase); Ubiquitinous metalloproteinase that is involved in diverse functions such as remodeling of the vasculature, angiogenesis, tissue repair, tumor invasion, inflammation, and atherosclerotic plaque rupture. As well as degrading extracellular matrix proteins, can also act on several nonmatrix proteins such as big en…
Cluster_5	Red	14	H1F0	9606.ENSP00000344504	H1 histone family, member 0; Histones H1 are necessary for the condensation of nucleosome chains into higher-order structures. The H1F0 histones are found in cells that are in terminal stages of differentiation or that have low rates of cell division
Cluster_5	Red	14	IL18R1	9606.ENSP00000233957	Interleukin 18 receptor 1; Receptor for interleukin 18 (IL-18). Binding to the agonist leads to the activation of NF-kappa-B
Cluster_5	Red	14	MAFF	9606.ENSP00000345393	V-maf musculoaponeurotic fibrosarcoma oncogene homolog F (avian); Interacts with the upstream promoter region of the oxytocin receptor gene. May be a transcriptional enhancer in the up-regulation of the oxytocin receptor gene at parturition. Since it lacks a putative transactivation domain, it may behave as a transcriptional repressor when it dimerize among himself. May also serve as a transcript…
Cluster_5	Red	14	F3	9606.ENSP00000334145	Coagulation factor III (thromboplastin, tissue factor); Initiates blood coagulation by forming a complex with circulating factor VII or VIIa. The [TF:VIIa] complex activates factors IX or X by specific limited protolysis. TF plays a role in normal hemostasis by initiating the cell-surface assembly and propagation of the coagulation protease cascade
Cluster_5	Red	14	LEF1	9606.ENSP00000265165	Lymphoid enhancer-binding factor 1; Participates in the Wnt signaling pathway. Activates transcription of target genes in the presence of CTNNB1 and EP300. May play a role in hair cell differentiation and follicle morphogenesis. TLE1, TLE2, TLE3 and TLE4 repress transactivation mediated by LEF1 and CTNNB1. Regulates T-cell receptor alpha enhancer function. Binds DNA in a sequence-specific manner.…
Cluster_5	Red	14	IL1R1	9606.ENSP00000233946	Interleukin 1 receptor, type I; Receptor for IL1A, IL1B and IL1RN. After binding to interleukin-1 associates with the corecptor IL1RAP to form the high affinity interleukin-1 receptor complex which mediates interleukin-1-dependent activation of NF-kappa-B, MAPK and other pathways. Signaling involves the recruitment of adapter molecules such as TOLLIP, MYD88, and IRAK1 or IRAK2 via the respective …
Cluster_5	Red	14	B2M	9606.ENSP00000452780	Beta-2-microglobulin; Component of the class I major histocompatibility complex (MHC). Involved in the presentation of peptide antigens to the immune system
Cluster_5	Red	14	HIPK3	9606.ENSP00000304226	Homeodomain interacting protein kinase 3; Serine/threonine-protein kinase involved in transcription regulation, apoptosis and steroidogenic gene expression. Phosphorylates JUN and RUNX2. Seems to negatively regulate apoptosis by promoting FADD phosphorylation. Enhances androgen receptor-mediated transcription. May act as a transcriptional corepressor for NK homeodomain transcription factors. The …
Cluster_5	Red	14	MAF	9606.ENSP00000327048	V-maf musculoaponeurotic fibrosarcoma oncogene homolog (avian); Acts as a transcriptional activator or repressor. Involved in embryonic lens fiber cell development. Recruits the transcriptional coactivators CREBBP and/or EP300 to crystallin promoters leading to up-regulation of crystallin gene during lens fiber cell differentiation. Activates the expression of IL4 in T helper 2 (Th2) cells. Incre…
Cluster_5	Red	14	KLF6	9606.ENSP00000419923	Kruppel-like factor 6; Transcriptional activator (By similarity). Binds a GC box motif. Could play a role in B-cell growth and development
Cluster_5	Red	14	FABP1	9606.ENSP00000295834	Fatty acid binding protein 1, liver; Plays a role in lipoprotein-mediated cholesterol uptake in hepatocytes (PubMed:25732850). Binds cholesterol (PubMed:25732850). Binds free fatty acids and their coenzyme A derivatives, bilirubin, and some other small molecules in the cytoplasm. May be involved in intracellular lipid transport (By similarity)
Cluster_5	Red	14	CHD3	9606.ENSP00000369716	Chromodomain helicase DNA binding protein 3; Component of the histone deacetylase NuRD complex which participates in the remodeling of chromatin by deacetylating histones. Required for anchoring centrosomal pericentrin in both interphase and mitosis, for spindle organization and centrosome integrity

## Sheet: STRING_HE_HLC
#cluster name	cluster color	gene count	protein name	protein identifier	protein description
Cluster_1	Cyan	37	EPAS1	9606.ENSP00000263734	Endothelial PAS domain protein 1; Transcription factor involved in the induction of oxygen regulated genes. Binds to core DNA sequence 5'-[AG]CGTG-3' within the hypoxia response element (HRE) of target gene promoters. Regulates the vascular endothelial growth factor (VEGF) expression and seems to be implicated in the development of blood vessels and the tubular system of lung. May also play a rol…
Cluster_1	Cyan	37	CAPN2	9606.ENSP00000295006	Calpain 2, (m/II) large subunit; Calcium-regulated non-lysosomal thiol-protease which catalyze limited proteolysis of substrates involved in cytoskeletal remodeling and signal transduction. Proteolytically cleaves MYOC at 'Arg-226' (PubMed:17650508)
Cluster_1	Cyan	37	FILIP1L	9606.ENSP00000346560	Filamin A interacting protein 1-like; Acts as a regulator of the antiangiogenic activity on endothelial cells. When overexpressed in endothelial cells, leads to inhibition of cell proliferation and migration and an increase in apoptosis. Inhibits melanoma growth When expressed in tumor- associated vasculature
Cluster_1	Cyan	37	PARM1	9606.ENSP00000370224	Prostate androgen-regulated mucin-like protein 1; May regulate TLP1 expression and telomerase activity, thus enabling certain prostatic cells to resist apoptosis
Cluster_1	Cyan	37	NID2	9606.ENSP00000216286	Nidogen 2 (osteonidogen); Cell adhesion glycoprotein which is widely distributed in basement membranes. Binds to collagens I and IV, to perlecan and to laminin 1. Does not bind fibulins. It probably has a role in cell-extracellular matrix interactions
Cluster_1	Cyan	37	SLCO2B1	9606.ENSP00000289575	Solute carrier organic anion transporter family, member 2B1; Mediates the Na(+)-independent transport of organic anions such as taurocholate, the prostaglandins PGD2, PGE1, PGE2, leukotriene C4, thromboxane B2 and iloprost
Cluster_1	Cyan	37	RNF128	9606.ENSP00000255499	Ring finger protein 128, E3 ubiquitin protein ligase; E3 ubiquitin-protein ligase that catalyzes 'Lys-48'- and 'Lys-63'-linked polyubiquitin chains formation. Functions as an inhibitor of cytokine gene transcription. Inhibits IL2 and IL4 transcription, thereby playing an important role in the induction of the anergic phenotype, a long-term stable state of T-lymphocyte unresponsiveness to antigeni…
Cluster_1	Cyan	37	IGF2	9606.ENSP00000391826	Insulin-like growth factor 2 (somatomedin A); The insulin-like growth factors possess growth-promoting activity. In vitro, they are potent mitogens for cultured cells. IGF-II is influenced by placental lactogen and may play a role in fetal development
Cluster_1	Cyan	37	XK	9606.ENSP00000367879	X-linked Kx blood group (McLeod syndrome); May be involved in sodium-dependent transport of neutral amino acids or oligopeptides
Cluster_1	Cyan	37	FLRT3	9606.ENSP00000339912	Fibronectin leucine rich transmembrane protein 3; Functions in cell-cell adhesion, cell migration and axon guidance, exerting an attractive or repulsive role depending on its interaction partners. Plays a role in the spatial organization of brain neurons. Plays a role in vascular development in the retina (By similarity). Plays a role in cell-cell adhesion via its interaction with ADGRL3 and prob…
Cluster_1	Cyan	37	AHNAK	9606.ENSP00000367263	AHNAK nucleoprotein; May be required for neuronal cell differentiation
Cluster_1	Cyan	37	ANKRD1	9606.ENSP00000360762	Ankyrin repeat domain 1 (cardiac muscle); May play an important role in endothelial cell activation. May act as a nuclear transcription factor that negatively regulates the expression of cardiac genes. Induction seems to be correlated with apoptotic cell death in hepatoma cells
Cluster_1	Cyan	37	FAM114A1	9606.ENSP00000351740	Family with sequence similarity 114, member A1; May play a role in neuronal cell development
Cluster_1	Cyan	37	GPC3	9606.ENSP00000377836	Glypican 3; Cell surface proteoglycan that bears heparan sulfate. Inhibits the dipeptidyl peptidase activity of DPP4. May be involved in the suppression/modulation of growth in the predominantly mesodermal tissues and organs. May play a role in the modulation of IGF2 interactions with its receptor and thereby modulate its function. May regulate growth and tumor predisposition
Cluster_1	Cyan	37	DLK1	9606.ENSP00000340292	Delta-like 1 homolog (Drosophila); May have a role in neuroendocrine differentiation
Cluster_1	Cyan	37	NEU1	9606.ENSP00000364782	Sialidase 1 (lysosomal sialidase); Catalyzes the removal of sialic acid (N-acetylneuraminic acid) moities from glycoproteins and glycolipids. To be active, it is strictly dependent on its presence in the multienzyme complex. Appears to have a preference for alpha 2-3 and alpha 2-6 sialyl linkage
Cluster_1	Cyan	37	PTN	9606.ENSP00000341170	Pleiotrophin; Secreted growth factor that induces neurite outgrowth and which is mitogenic for fibroblasts, epithelial, and endothelial cells. Binds anaplastic lymphoma kinase (ALK) which induces MAPK pathway activation, an important step in the anti- apoptotic signaling of PTN and regulation of cell proliferation
Cluster_1	Cyan	37	KYNU	9606.ENSP00000264170	Kynureninase; Catalyzes the cleavage of L-kynurenine (L-Kyn) and L-3- hydroxykynurenine (L-3OHKyn) into anthranilic acid (AA) and 3- hydroxyanthranilic acid (3-OHAA), respectively. Has a preference for the L-3-hydroxy form. Also has cysteine-conjugate-beta-lyase activity
Cluster_1	Cyan	37	PCDH7	9606.ENSP00000441802	Protocadherin 7
Cluster_1	Cyan	37	S100A14	9606.ENSP00000340463	S100 calcium binding protein A14; Modulates P53/TP53 protein levels, and thereby plays a role in the regulation of cell survival and apoptosis. Depending on the context, it can promote cell proliferation or apoptosis. Plays a role in the regulation of cell migration by modulating the levels of MMP2, a matrix protease that is under transcriptional control of P53/TP53. Does not bind calcium
Cluster_1	Cyan	37	IGSF1	9606.ENSP00000359940	Immunoglobulin superfamily, member 1; Seems to be a coreceptor in inhibin signaling, but seems not to be a high-affinity inhibin receptor. Antagonizes activin A signaling in the presence or absence of inhibin B (By similarity). Necessary to mediate a specific antagonistic effect of inhibin B on activin-stimulated transcription
Cluster_1	Cyan	37	DSC3	9606.ENSP00000353608	Desmocollin 3; Component of intercellular desmosome junctions. Involved in the interaction of plaque proteins and intermediate filaments mediating cell-cell adhesion. May contribute to epidermal cell positioning (stratification) by mediating differential adhesiveness between cells that express different isoforms
Cluster_1	Cyan	37	MEST	9606.ENSP00000223215	Mesoderm specific transcript homolog (mouse)
Cluster_1	Cyan	37	MFAP4	9606.ENSP00000378957	Microfibrillar-associated protein 4; Could be involved in calcium-dependent cell adhesion or intercellular interactions
Cluster_1	Cyan	37	IGFBP3	9606.ENSP00000370473	Insulin-like growth factor binding protein 3; IGF-binding proteins prolong the half-life of the IGFs and have been shown to either inhibit or stimulate the growth promoting effects of the IGFs on cell culture. They alter the interaction of IGFs with their cell surface receptors. Also exhibits IGF-independent antiproliferative and apoptotic effects mediated by its receptor TMEM219/IGFBP-3R
Cluster_1	Cyan	37	KDELR3	9606.ENSP00000386918	KDEL (Lys-Asp-Glu-Leu) endoplasmic reticulum protein retention receptor 3; Required for the retention of luminal endoplasmic reticulum proteins. Determines the specificity of the luminal ER protein retention system. Also required for normal vesicular traffic through the Golgi. This receptor recognizes K-D-E-L (By similarity)
Cluster_1	Cyan	37	CLEC1B	9606.ENSP00000298527	C-type lectin domain family 1, member B
Cluster_1	Cyan	37	IL6ST	9606.ENSP00000338799	Interleukin 6 signal transducer (gp130, oncostatin M receptor); Signal-transducing molecule. The receptor systems for IL6, LIF, OSM, CNTF, IL11, CTF1 and BSF3 can utilize IL6ST for initiating signal transmission. Binding of IL6 to IL6R induces IL6ST homodimerization and formation of a high-affinity receptor complex, which activates Janus kinases (PubMed:2261637). That causes phosphorylation of IL…
Cluster_1	Cyan	37	SLC40A1	9606.ENSP00000261024	Solute carrier family 40 (iron-regulated transporter), member 1; May be involved in iron export from duodenal epithelial cell and also in transfer of iron between maternal and fetal circulation. Mediates iron efflux in the presence of a ferroxidase (hephaestin and/or ceruloplasmin)
Cluster_1	Cyan	37	CDKN1C	9606.ENSP00000411552	Cyclin-dependent kinase inhibitor 1C (p57, Kip2); Potent tight-binding inhibitor of several G1 cyclin/CDK complexes (cyclin E-CDK2, cyclin D2-CDK4, and cyclin A-CDK2) and, to lesser extent, of the mitotic cyclin B-CDC2. Negative regulator of cell proliferation. May play a role in maintenance of the non- proliferative state throughout life
Cluster_1	Cyan	37	CXCL14	9606.ENSP00000337065	Chemokine (C-X-C motif) ligand 14; Potent chemoattractant for neutrophils, and weaker for dendritic cells. Not chemotactic for T-cells, B-cells, monocytes, natural killer cells or granulocytes. Does not inhibit proliferation of myeloid progenitors in colony formation assays
Cluster_1	Cyan	37	VIL1	9606.ENSP00000248444	Villin 1; Epithelial cell-specific Ca(2+)-regulated actin- modifying protein that modulates the reorganization of microvillar actin filaments. Plays a role in the actin nucleation, actin filament bundle assembly, actin filament capping and severing. Binds phosphatidylinositol 4,5-bisphosphate (PIP2) and lysophosphatidic acid (LPA); binds LPA with higher affinity than PIP2. Binding to LPA increase…
Cluster_1	Cyan	37	ANKS1A	9606.ENSP00000353518	Ankyrin repeat and sterile alpha motif domain containing 1A; Regulator of different signaling pathways. Regulates EPHA8 receptor tyrosine kinase signaling to control cell migration and neurite retraction (By similarity)
Cluster_1	Cyan	37	GHR	9606.ENSP00000230882	Growth hormone receptor; Receptor for pituitary gland growth hormone involved in regulating postnatal body growth. On ligand binding, couples to the JAK2/STAT5 pathway (By similarity)
Cluster_1	Cyan	37	SLIT3	9606.ENSP00000430333	Slit homolog 3 (Drosophila); May act as molecular guidance cue in cellular migration, and function may be mediated by interaction with roundabout homolog receptors
Cluster_1	Cyan	37	ADAMTS9	9606.ENSP00000418735	ADAM metallopeptidase with thrombospondin type 1 motif, 9; Cleaves the large aggregating proteoglycans, aggrecan and versican. Has a protease-independent function in promoting the transport from the endoplasmic reticulum to the Golgi apparatus of a variety of secretory cargos
Cluster_1	Cyan	37	ACAA1	9606.ENSP00000333664	acetyl-CoA acyltransferase 1
Cluster_2	Red	25	HPX	9606.ENSP00000265983	Hemopexin; Binds heme and transports it to the liver for breakdown and iron recovery, after which the free hemopexin returns to the circulation
Cluster_2	Red	25	SPARC	9606.ENSP00000231061	Secreted protein, acidic, cysteine-rich (osteonectin); Appears to regulate cell growth through interactions with the extracellular matrix and cytokines. Binds calcium and copper, several types of collagen, albumin, thrombospondin, PDGF and cell membranes. There are two calcium binding sites; an acidic domain that binds 5 to 8 Ca(2+) with a low affinity and an EF-hand loop that binds a Ca(2+) ion …
Cluster_2	Red	25	A2M	9606.ENSP00000323929	Alpha-2-macroglobulin; Is able to inhibit all four classes of proteinases by a unique 'trapping' mechanism. This protein has a peptide stretch, called the 'bait region' which contains specific cleavage sites for different proteinases. When a proteinase cleaves the bait region, a conformational change is induced in the protein which traps the proteinase. The entrapped enzyme remains active against…
Cluster_2	Red	25	DPP4	9606.ENSP00000353731	Dipeptidyl-peptidase 4; Cell surface glycoprotein receptor involved in the costimulatory signal essential for T-cell receptor (TCR)-mediated T-cell activation. Acts as a positive regulator of T-cell coactivation, by binding at least ADA, CAV1, IGF2R, and PTPRC. Its binding to CAV1 and CARD11 induces T-cell proliferation and NF- kappa-B activation in a T-cell receptor/CD3-dependent manner. Its int…
Cluster_2	Red	25	FGA	9606.ENSP00000306361	Fibrinogen alpha chain; Cleaved by the protease thrombin to yield monomers which, together with fibrinogen beta (FGB) and fibrinogen gamma (FGG), polymerize to form an insoluble fibrin matrix. Fibrin has a major function in hemostasis as one of the primary components of blood clots. In addition, functions during the early stages of wound repair to stabilize the lesion and guide cell migration dur…
Cluster_2	Red	25	AHSG	9606.ENSP00000393887	alpha-2-HS-glycoprotein; Promotes endocytosis, possesses opsonic properties and influences the mineral phase of bone. Shows affinity for calcium and barium ions
Cluster_2	Red	25	RBP4	9606.ENSP00000360519	Retinol binding protein 4, plasma; Delivers retinol from the liver stores to the peripheral tissues. In plasma, the RBP-retinol complex interacts with transthyretin, this prevents its loss by filtration through the kidney glomeruli
Cluster_2	Red	25	FGG	9606.ENSP00000336829	Fibrinogen gamma chain; Together with fibrinogen alpha (FGA) and fibrinogen beta (FGB), polymerizes to form an insoluble fibrin matrix. Has a major function in hemostasis as one of the primary components of blood clots. In addition, functions during the early stages of wound repair to stabilize the lesion and guide cell migration during re- epithelialization. Was originally thought to be essentia…
Cluster_2	Red	25	SERPINA1	9606.ENSP00000348068	Serpin peptidase inhibitor, clade A (alpha-1 antiproteinase, antitrypsin), member 1; Inhibitor of serine proteases. Its primary target is elastase, but it also has a moderate affinity for plasmin and thrombin. Irreversibly inhibits trypsin, chymotrypsin and plasminogen activator. The aberrant form inhibits insulin-induced NO synthesis in platelets, decreases coagulation time and has proteolytic a…
Cluster_2	Red	25	ANPEP	9606.ENSP00000300060	Alanyl (membrane) aminopeptidase; Broad specificity aminopeptidase. Plays a role in the final digestion of peptides generated from hydrolysis of proteins by gastric and pancreatic proteases. May play a critical role in the pathogenesis of cholesterol gallstone disease. May be involved in the metabolism of regulatory peptides of diverse cell types, responsible for the processing of peptide hormone…
Cluster_2	Red	25	TTR	9606.ENSP00000237014	Transthyretin; Thyroid hormone-binding protein. Probably transports thyroxine from the bloodstream to the brain
Cluster_2	Red	25	PCSK5	9606.ENSP00000446280	Proprotein convertase subtilisin/kexin type 5; Likely to represent a widespread endoprotease activity within the constitutive and regulated secretory pathway. Capable of cleavage at the RX(K/R)R consensus motif. Plays an essential role in pregnancy establishment by proteolytic activation of a number of important factors such as BMP2, CALD1 and alpha- integrins
Cluster_2	Red	25	VTN	9606.ENSP00000226218	Vitronectin; Vitronectin is a cell adhesion and spreading factor found in serum and tissues. Vitronectin interact with glycosaminoglycans and proteoglycans. Is recognized by certain members of the integrin family and serves as a cell-to-substrate adhesion molecule. Inhibitor of the membrane-damaging effect of the terminal cytolytic complement pathway
Cluster_2	Red	25	HAVCR1	9606.ENSP00000344844	Hepatitis A virus cellular receptor 1; May play a role in T-helper cell development and the regulation of asthma and allergic diseases. Receptor for TIMD4 (By similarity). May play a role in kidney injury and repair
Cluster_2	Red	25	CTSB	9606.ENSP00000342070	Cathepsin B; Thiol protease which is believed to participate in intracellular degradation and turnover of proteins. Has also been implicated in tumor invasion and metastasis
Cluster_2	Red	25	GSTA1	9606.ENSP00000335620	Glutathione S-transferase alpha 1; Conjugation of reduced glutathione to a wide number of exogenous and endogenous hydrophobic electrophiles
Cluster_2	Red	25	FGB	9606.ENSP00000306099	Fibrinogen beta chain; Cleaved by the protease thrombin to yield monomers which, together with fibrinogen alpha (FGA) and fibrinogen gamma (FGG), polymerize to form an insoluble fibrin matrix. Fibrin has a major function in hemostasis as one of the primary components of blood clots. In addition, functions during the early stages of wound repair to stabilize the lesion and guide cell migration dur…
Cluster_2	Red	25	TFPI	9606.ENSP00000233156	Tissue factor pathway inhibitor (lipoprotein-associated coagulation inhibitor); Inhibits factor X (X(a)) directly and, in a Xa-dependent way, inhibits VIIa/tissue factor activity, presumably by forming a quaternary Xa/LACI/VIIa/TF complex. It possesses an antithrombotic action and also the ability to associate with lipoproteins in plasma
Cluster_2	Red	25	TIMP3	9606.ENSP00000266085	TIMP metallopeptidase inhibitor 3; Complexes with metalloproteinases (such as collagenases) and irreversibly inactivates them by binding to their catalytic zinc cofactor. May form part of a tissue-specific acute response to remodeling stimuli. Known to act on MMP-1, MMP-2, MMP-3, MMP-7, MMP-9, MMP-13, MMP-14 and MMP-15
Cluster_2	Red	25	SERPIND1	9606.ENSP00000215727	Serpin peptidase inhibitor, clade D (heparin cofactor), member 1; Thrombin inhibitor activated by the glycosaminoglycans, heparin or dermatan sulfate. In the presence of the latter, HC-II becomes the predominant thrombin inhibitor in place of antithrombin III (AT-III). Also inhibits chymotrypsin, but in a glycosaminoglycan-independent manner
Cluster_2	Red	25	LGALS3	9606.ENSP00000254301	Lectin, galactoside-binding, soluble, 3; Galactose-specific lectin which binds IgE. May mediate with the alpha-3, beta-1 integrin the stimulation by CSPG4 of endothelial cells migration. Together with DMBT1, required for terminal differentiation of columnar epithelial cells during early embryogenesis (By similarity). In the nucleus: acts as a pre-mRNA splicing factor. Involved in acute inflammato…
Cluster_2	Red	25	FN1	9606.ENSP00000346839	Fibronectin 1
Cluster_2	Red	25	SERPINA7	9606.ENSP00000329374	Serpin peptidase inhibitor, clade A (alpha-1 antiproteinase, antitrypsin), member 7; Major thyroid hormone transport protein in serum
Cluster_2	Red	25	LOX	9606.ENSP00000231004	Lysyl oxidase; Responsible for the post-translational oxidative deamination of peptidyl lysine residues in precursors to fibrous collagen and elastin. In addition to cross-linking of extracellular matrix proteins, may have a direct role in tumor suppression
Cluster_2	Red	25	ALB	9606.ENSP00000295897	Albumin; Serum albumin, the main protein of plasma, has a good binding capacity for water, Ca(2+), Na(+), K(+), fatty acids, hormones, bilirubin and drugs. Its main function is the regulation of the colloidal osmotic pressure of blood. Major zinc transporter in plasma, typically binds about 80% of all plasma zinc
Cluster_3	Yellow	11	TGFBI	9606.ENSP00000416330	Transforming growth factor, beta-induced, 68kDa; Plays a role in cell adhesion (PubMed:8024701). May play a role in cell-collagen interactions (By similarity)
Cluster_3	Yellow	11	POSTN	9606.ENSP00000369071	Periostin, osteoblast specific factor; Induces cell attachment and spreading and plays a role in cell adhesion (PubMed:12235007). Enhances incorporation of BMP1 in the fibronectin matrix of connective tissues, and subsequent proteolytic activation of lysyl oxidase LOX (By similarity)
Cluster_3	Yellow	11	LUM	9606.ENSP00000266718	Lumican
Cluster_3	Yellow	11	COL3A1	9606.ENSP00000304408	Collagen, type III, alpha 1; Collagen type III occurs in most soft connective tissues along with type I collagen. Involved in regulation of cortical development. Is the major ligand of GPR56 in the developing brain and binding to GPR56 inhibits neuronal migration and activates the RhoA pathway by coupling GPR56 to GNA13 and possibly GNA12
Cluster_3	Yellow	11	COL1A1	9606.ENSP00000225964	Collagen, type I, alpha 1; Type I collagen is a member of group I collagen (fibrillar forming collagen)
Cluster_3	Yellow	11	SERPINF1	9606.ENSP00000254722	Serpin peptidase inhibitor, clade F (alpha-2 antiplasmin, pigment epithelium derived factor), member 1; Neurotrophic protein; induces extensive neuronal differentiation in retinoblastoma cells. Potent inhibitor of angiogenesis. As it does not undergo the S (stressed) to R (relaxed) conformational transition characteristic of active serpins, it exhibits no serine protease inhibitory activity
Cluster_3	Yellow	11	ZEB2	9606.ENSP00000302501	Zinc finger E-box binding homeobox 2; Transcriptional inhibitor that binds to DNA sequence 5'- CACCT-3' in different promoters. Represses transcription of E- cadherin
Cluster_3	Yellow	11	COL6A3	9606.ENSP00000295550	Collagen, type VI, alpha 3; Collagen VI acts as a cell-binding protein
Cluster_3	Yellow	11	COL5A1	9606.ENSP00000360882	Collagen, type V, alpha 1; Type V collagen is a member of group I collagen (fibrillar forming collagen). It is a minor connective tissue component of nearly ubiquitous distribution. Type V collagen binds to DNA, heparan sulfate, thrombospondin, heparin, and insulin
Cluster_3	Yellow	11	COL1A2	9606.ENSP00000297268	Collagen, type I, alpha 2; Type I collagen is a member of group I collagen (fibrillar forming collagen)
Cluster_3	Yellow	11	FBN1	9606.ENSP00000325527	Fibrillin 1; Fibrillins are structural components of 10-12 nm extracellular calcium-binding microfibrils, which occur either in association with elastin or in elastin-free bundles. Fibrillin-1- containing microfibrils provide long-term force bearing structural support. Regulates osteoblast maturation by controlling TGF-beta bioavailability and calibrating TGF-beta and BMP levels, respectively
Cluster_4	Blue	9	TF	9606.ENSP00000385834	Transferrin; Transferrins are iron binding transport proteins which can bind two Fe(3+) ions in association with the binding of an anion, usually bicarbonate. It is responsible for the transport of iron from sites of absorption and heme degradation to those of storage and utilization. Serum transferrin may also have a further role in stimulating cell proliferation
Cluster_4	Blue	9	ANGPTL3	9606.ENSP00000360170	Angiopoietin-like 3; Acts in part as a hepatokine that is involved in regulation of lipid and glucose metabolism (PubMed:11788823, PubMed:12909640, PubMed:23661675, PubMed:25495645). Proposed to play a role in the trafficking of energy substrates to either storage or oxidative tissues in response to food intake (By similarity). Has a stimulatory effect on plasma triglycerides (TG), which is achie…
Cluster_4	Blue	9	APOA4	9606.ENSP00000350425	Apolipoprotein A-IV; May have a role in chylomicrons and VLDL secretion and catabolism. Required for efficient activation of lipoprotein lipase by ApoC-II; potent activator of LCAT. Apoa-IV is a major component of HDL and chylomicrons
Cluster_4	Blue	9	APOA1	9606.ENSP00000236850	Apolipoprotein A-I; Participates in the reverse transport of cholesterol from tissues to the liver for excretion by promoting cholesterol efflux from tissues and by acting as a cofactor for the lecithin cholesterol acyltransferase (LCAT). As part of the SPAP complex, activates spermatozoa motility
Cluster_4	Blue	9	LRP2	9606.ENSP00000263816	Low density lipoprotein receptor-related protein 2; Acts together with cubilin to mediate HDL endocytosis (By similarity). May participate in regulation of parathyroid- hormone and para-thyroid-hormone-related protein release
Cluster_4	Blue	9	AFP	9606.ENSP00000379138	Alpha-fetoprotein; Binds copper, nickel, and fatty acids as well as, and bilirubin less well than, serum albumin. Only a small percentage (less than 2%) of the human AFP shows estrogen-binding properties
Cluster_4	Blue	9	APOM	9606.ENSP00000365081	Apolipoprotein M; Probably involved in lipid transport. Can bind sphingosine-1-phosphate, myristic acid, palmitic acid and stearic acid, retinol, all-trans-retinoic acid and 9-cis-retinoic acid
Cluster_4	Blue	9	APOB	9606.ENSP00000233242	Apolipoprotein B (including Ag(x) antigen); Apolipoprotein B is a major protein constituent of chylomicrons (apo B-48), LDL (apo B-100) and VLDL (apo B-100). Apo B-100 functions as a recognition signal for the cellular binding and internalization of LDL particles by the apoB/E receptor
Cluster_4	Blue	9	APOA2	9606.ENSP00000356969	Apolipoprotein A-II; May stabilize HDL (high density lipoprotein) structure by its association with lipids, and affect the HDL metabolism
Cluster_5	Green	2	LCP1	9606.ENSP00000315757	Lymphocyte cytosolic protein 1 (L-plastin); Actin-binding protein. Plays a role in the activation of T-cells in response to costimulation through TCR/CD3 and CD2 or CD28. Modulates the cell surface expression of IL2RA/CD25 and CD69
Cluster_5	Green	2	GSN	9606.ENSP00000362924	Gelsolin; Calcium-regulated, actin-modulating protein that binds to the plus (or barbed) ends of actin monomers or filaments, preventing monomer exchange (end-blocking or capping). It can promote the assembly of monomers into filaments (nucleation) as well as sever filaments already formed. Plays a role in ciliogenesis
