# Supplementary material for: Analysis of the transcription factors and their regulatory roles during a step-by-step differentiation of induced pluripotent stem cells into hepatocyte-like cells
Source: Royal Society of Chemistry journal article supplement (doi:10.1039/c9mo00122k), 2019-10-15
Supplement: c9mo00122k3.pdf [file c9mo00122k3.pdf]

**Supplementary table 1** : Detailed protocols, culture medium changed everyday

| <b>Differentiation step</b>                            | <b>Days</b> | <b>Medium composition</b>                          | <b>Atmospheric composition</b>                | <b>Protocol 1</b> |
|--------------------------------------------------------|-------------|----------------------------------------------------|-----------------------------------------------|-------------------|
| <b>S1<br/>(definitive endoderm, DE)</b>                | D1          | RPMI-1640 / B27, Activin A (100 ng/mL)             | 37°C, 20% O <sub>2</sub> , 5% CO <sub>2</sub> |                   |
|                                                        | D2          |                                                    |                                               |                   |
|                                                        | D3          |                                                    |                                               |                   |
|                                                        | D4          |                                                    |                                               |                   |
|                                                        | D5          |                                                    |                                               |                   |
| <b>S2<br/>(Early hepatocyte progenitor, Early_Pro)</b> | D1          | RPMI-1640 / B27, FBF-2 (10 ng/mL), BMP4 (20 ng/mL) | 37°C, 5% O <sub>2</sub> , 5% CO <sub>2</sub>  |                   |
|                                                        | D2          |                                                    |                                               |                   |
|                                                        | D3          |                                                    |                                               |                   |
|                                                        | D4          |                                                    |                                               |                   |
|                                                        | D5          |                                                    |                                               |                   |
| <b>S3<br/>(hepatocytes progenitor, Pro_Hep)</b>        | D1          | RPMI-1640 / B27, HGF (20 ng/mL)                    | 37°C, 5% O <sub>2</sub> , 5% CO <sub>2</sub>  |                   |
|                                                        | D2          |                                                    |                                               |                   |
|                                                        | D3          |                                                    |                                               |                   |
|                                                        | D4          |                                                    |                                               |                   |
|                                                        | D5          |                                                    |                                               |                   |
| <b>S4<br/>(hepatocyte-like cell, Late_Hep)</b>         | D1          | Lonza HBM without hEGF, OSM (20 ng/mL)             | 37°C, 20% O <sub>2</sub> , 5% CO <sub>2</sub> |                   |
|                                                        | D2          |                                                    |                                               |                   |
|                                                        | D3          |                                                    |                                               |                   |
|                                                        | D4          |                                                    |                                               |                   |
|                                                        | D5          |                                                    |                                               |                   |
|                                                        | D6          |                                                    |                                               |                   |
|                                                        | D7          |                                                    |                                               |                   |

**Supplementary table 2** : Primer list used for RTqPCR

| <b>Target</b> | <b>Primer</b> | <b>Sequence (5'-3')</b>    |
|---------------|---------------|----------------------------|
| FOXA2         | Fw            | GGTGATTGCTGGTCGTTTGTGTTGTG |
|               | Rv            | GCCGACATGCTCATGTACGTGTT    |
| HNF4a         | Fw            | CGTCATCGTTGCCAACACAAT      |
|               | Rv            | GGGCCACTCACACATCTGTC       |
| AFP           | Fw            | TGGGACCCGAACTTTCCA         |
|               | Rv            | GGCCACATCCAGGACTAGTTTC     |
| ALB           | Fw            | CCTGCTGACTTGCCTTCATTAG     |
|               | Rv            | TGGCATAGCATTTCATGAGGA      |
| OCT3/4        | Fw            | AGTGGGTGGAGGAAGCTGACAAC    |
|               | Rv            | TCGTTGTGCATAGTCGCTGCTTGA   |
| CDH1          | Fw            | GTGCTCTTCCAGGAACCTCT       |
|               | Rv            | GGTGTTCACATCATCGTCCG       |
| CDH2          | Fw            | CCATCATTGCCATCCTGCTC       |
|               | Rv            | GTTTGGCCTGGCGTTCTTTA       |
| SNAI1         | Fw            | AAGCCTAACTACAGCGAGCT       |
|               | Rv            | GGCTGCTGGAAGGTAAACTC       |
| SNAI2         | Fw            | AGCATTTC AACGCCTCCAAA      |
|               | Rv            | TGGTTGTGGTATGACAGGCA       |
| BMP4          | Fw            | CTGAGCCTTTCCAGCAAGTT       |
|               | Rv            | TCAGCATTTCGGTTACCAGGA      |

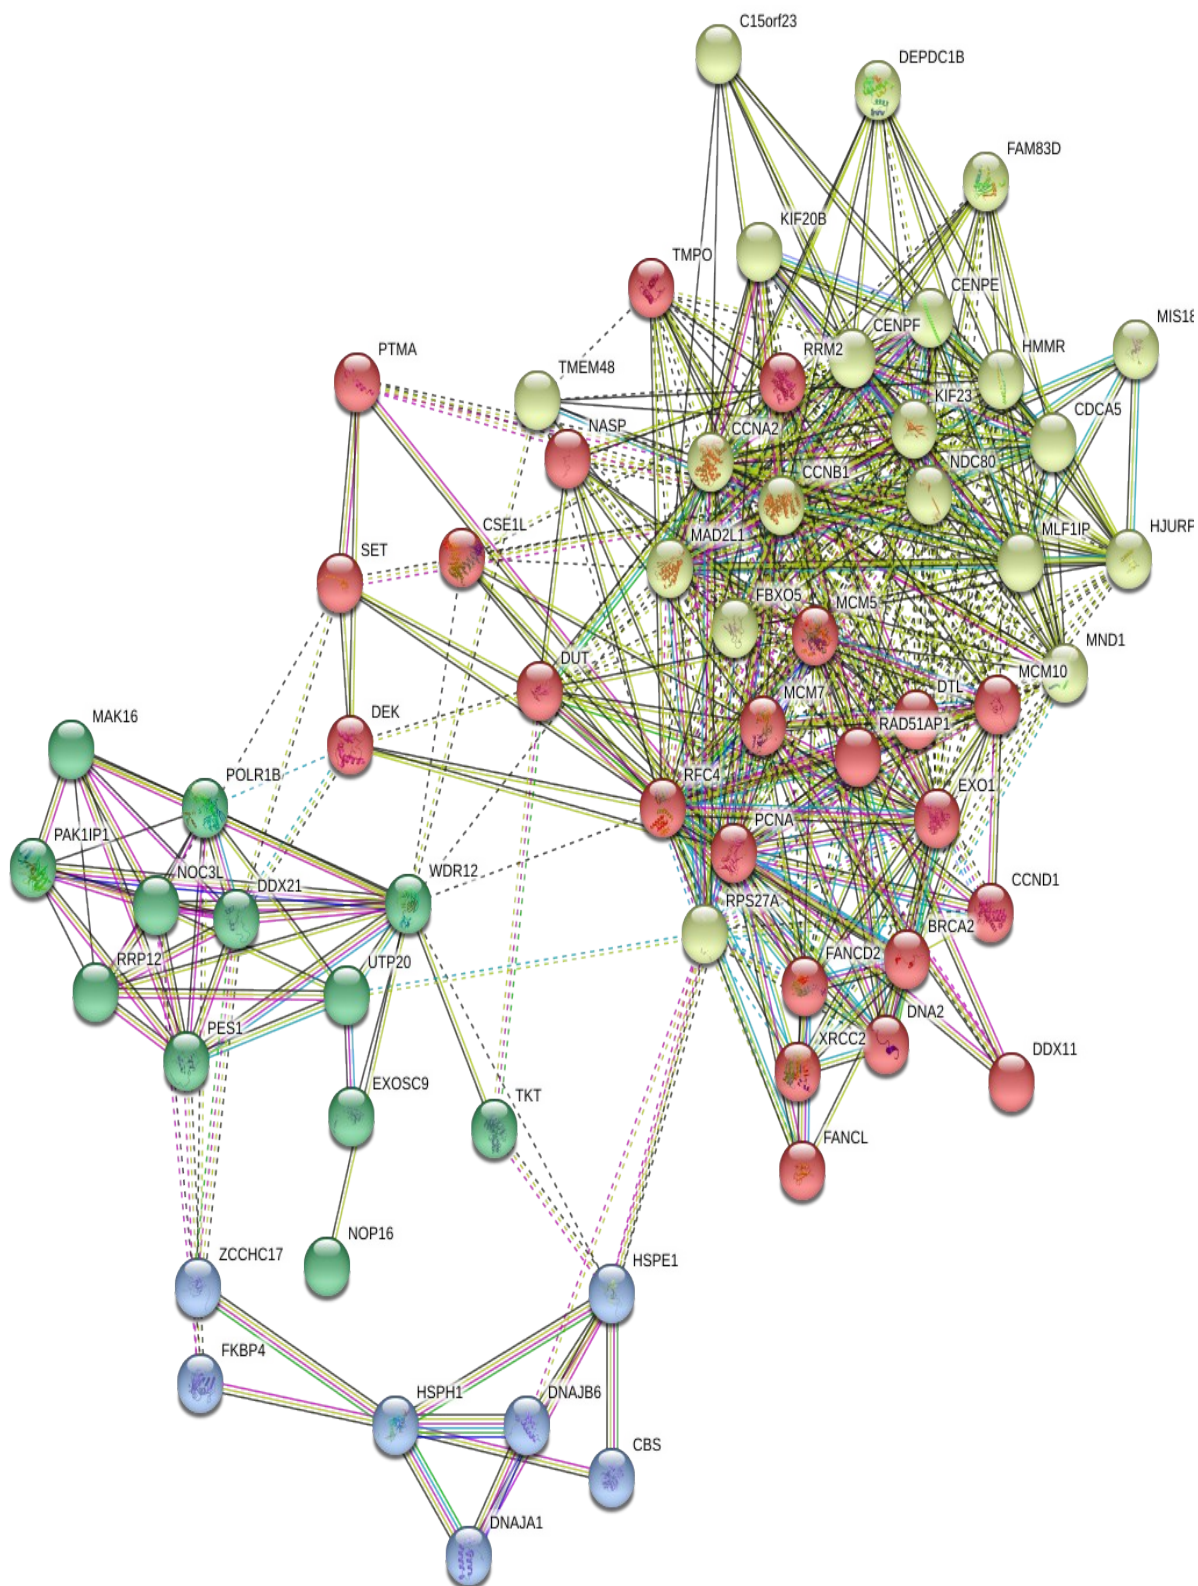

**Supplementary Figure S1** : Network of the genes representing the iPSC cluster. Genes of the network are provided in supplementary file 3

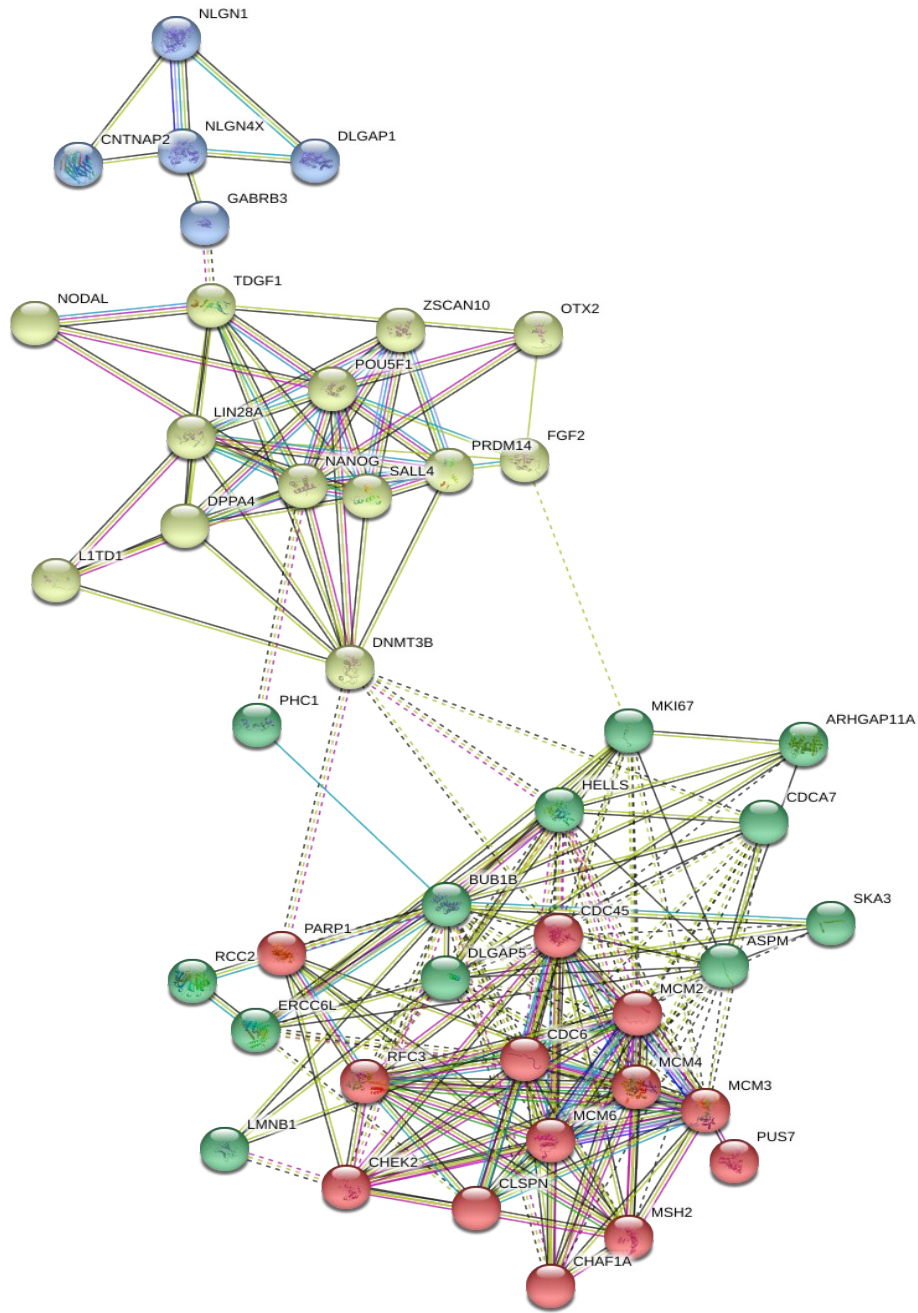

**Supplementary Figure S2:** Network of the genes representing the iPSC\_DE cluster. Genes of the network are provided in supplementary file 3

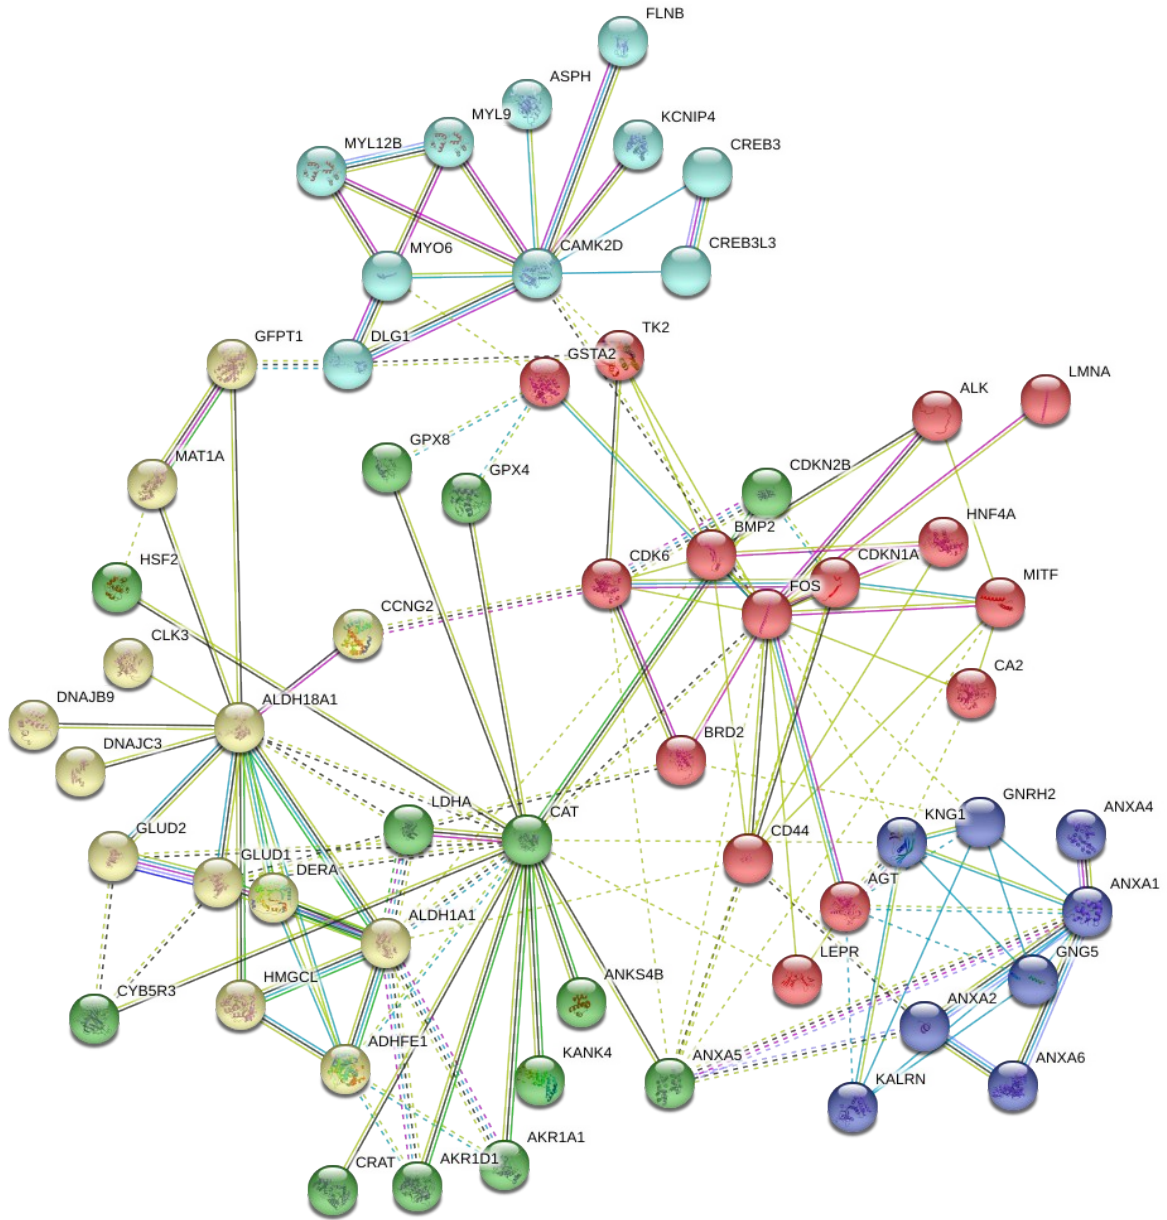

**Supplementary Figure S3:** Network of the genes representing the HE cluster. Genes of the network are provided in supplementary file 3



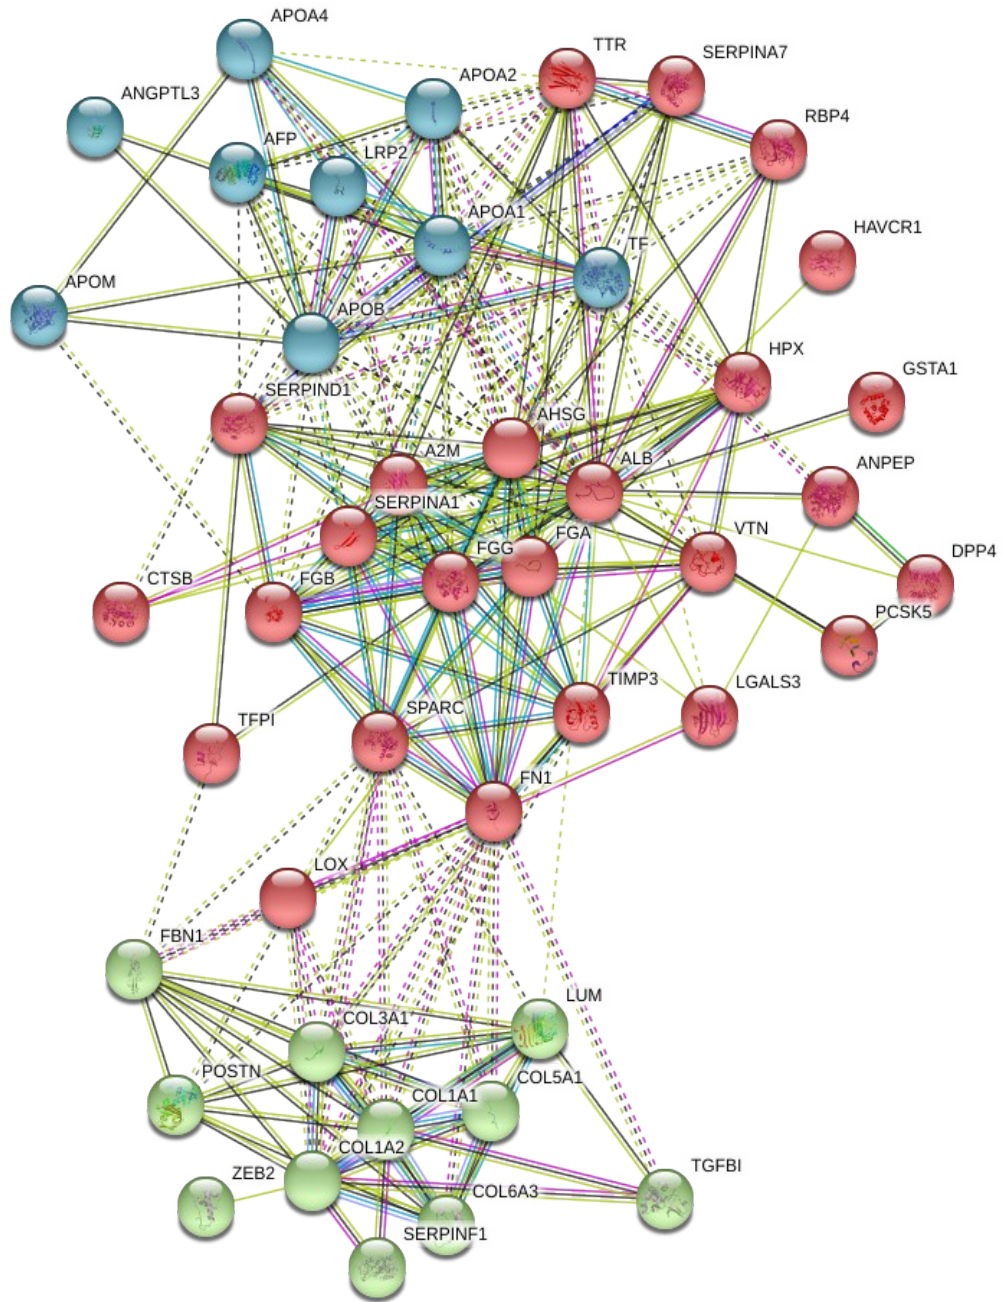

**Supplementary Figure S4:** Network of the genes representing the HE\_HLC cluster. Genes of the network are provided in supplementary file 3
