# Supplementary material for: Analysis of the transcription factors and their regulatory roles during a step-by-step differentiation of induced pluripotent stem cells into hepatocyte-like cells
Source: Royal Society of Chemistry journal article supplement (doi:10.1039/c9mo00122k), 2019-10-15
Supplement: c9mo00122k4.xlsx [file c9mo00122k4.xlsx]

## Sheet: K-means-gene-list
X	X.1	Cluster	iPSC_rep1	iPSC_rep2	iPSC_rep3	DE_rep1	DE_rep2	DE_rep3	HE_rep1	HE_rep2	HE_rep3	HLC_rep1	HLC_rep2	HLC_rep3
ENSG00000148672	GLUD1	Hepatic Endoderm	-1.24349099623919	-1.17591629759177	-1.44310736467484	-1.9956986468682	-1.38162157846247	-1.46722119098872	1.66356368486914	2.42169500903569	3.28896744609479	0.273584804275892	0.0800329414409893	0.979212189108686
ENSG00000107611	CUBN	Hepatic Endoderm	-1.7319154869866	-1.7319154869866	-1.7319154869866	-0.486715654980607	-1.7319154869866	-0.555101509990518	0.927499119982563	2.91216402630204	3.08954637174747	0.316678591177147	0.36327225772039	0.360318745987916
ENSG00000104419	NDRG1	Hepatic Endoderm	-1.46122077743679	-1.46122077743679	-1.46122077743679	-1.46122077743679	-0.957083326806497	-1.46122077743679	0.091516925566467	2.48385519171119	2.31102956712109	0.718020951967898	2.02775112208606	0.63101345553773
ENSG00000282800	MIR22HG	Hepatic Endoderm	-1.36925929911594	-1.44150932225924	-1.07505151172695	-0.406207964784056	-0.888900258779452	-0.105371902240479	4.47152604516661	-0.153558165301062	0.205814299053182	0.41334305585088	0.329289071153185	0.01988595298333
ENSG00000188488	SERPINA5	Hepatic Endoderm	-1.26369021199113	-1.15120881458086	-1.47559816587543	-1.47559816587543	-1.47559816587543	-1.23667689235026	0.297202408160932	2.12665131993951	2.73650525552926	1.46290981534651	0.474390676159572	0.980710941412752
ENSG00000133106	EPSTI1	Hepatic Endoderm	-2.59022464336321	-2.26583529206864	-2.38413437215018	0.149157566312194	0.313443198015771	0.242409834236919	1.06540190540217	1.64484726850485	1.87612558925102	0.488801326178006	0.731739302666125	0.728268317014969
ENSG00000171132	PRKCE	Hepatic Endoderm	-1.39138167046287	-0.945615541498624	-1.4051272456276	-1.28512866662453	-1.95176082737683	-1.16898343556228	1.46354709995474	1.30718176627967	2.81912213260287	1.2553032755241	0.798294832880004	0.50454827991135
RP11-242D8.1	NA	Hepatic Endoderm	-0.749316002255416	-1.38789274317507	-1.32589539616908	-0.352591385699883	0.0990454485162942	-0.0517553231563062	-1.14334202071699	3.22609428979461	2.72192584194968	-1.23498994876079	0.514818140365971	-0.316100900693038
ENSG00000122787	AKR1D1	Hepatic Endoderm	-1.44271333284358	-1.44271333284358	-1.44271333284358	-1.44271333284358	-1.16873492790762	-1.44271333284358	1.83553905484942	1.68087501747095	2.16636625897471	0.462213047152586	1.12025595494103	1.11705225873681
ENSG00000166165	CKB	Hepatic Endoderm	-0.709931488625529	-1.10063876092502	-0.862779221802163	-1.24922819341289	-1.72067394880856	-1.68072945360981	2.08424644002417	2.06455149837384	2.55129233103368	-0.13876804416539	0.383185872953006	0.379472968964664
ENSG00000171766	GATM	Hepatic Endoderm	-1.66155339239098	-1.73380341553428	-1.85210249561582	-0.23230945570891	-0.163360068827166	-0.241986617418425	0.601221840140319	2.37307889510258	3.07495623321488	0.12104896257584	0.168907468006759	-0.454097953544805
ENSG00000165124	SVEP1	Hepatic Endoderm	-1.42243587530491	-1.04528156410689	-1.24795713088866	-1.63434382918921	-1.63434382918921	-1.39542255566405	2.02128271957617	1.88404390554325	1.10600506635271	1.2284154710523	0.713611484221895	1.42642613759661
ENSG00000146374	RSPO3	Hepatic Endoderm	-1.20337490190057	-1.41528285578487	-1.41528285578487	-1.41528285578487	-1.41528285578487	-1.41528285578487	1.2441317511843	1.94348411105227	2.23168508288671	0.763958873619818	0.679904888922123	1.41662447315969
ENSG00000103064	SLC7A6	Hepatic Endoderm	-1.76260650369747	-1.41674687763638	-0.828335759102384	-1.46371534884693	-0.876550419444321	-1.34719656022695	2.01541653665167	1.59196482257109	2.49737067289694	0.816128985740166	0.435208885926889	0.339061565167697
ENSG00000138823	MTTP	Hepatic Endoderm	-1.09957641923461	-1.31148437311891	-1.31148437311891	-1.31148437311891	-1.31148437311891	-1.31148437311891	2.03692270147053	1.81210397719562	2.2586849420293	0.987550018181497	0.477039825294546	0.0846968206576815
ENSG00000026025	VIM	Hepatic Endoderm	-2.23277668639174	-1.62327077495139	-1.80747004528114	-0.582365240702097	-0.734583362827919	-0.484688019504484	1.49464176529084	1.85807202276844	1.9292755483723	0.803971647170911	0.632287190473737	0.74690595558253
ENSG00000155465	SLC7A7	Hepatic Endoderm	-1.42494338314033	-1.42494338314033	-1.42494338314033	-0.94822431256578	-1.42494338314033	-1.18602210961516	0.347857190896034	1.88477461819373	2.14522593200789	1.18331410056025	1.13802590464428	1.13482220844006
ENSG00000137831	UACA	Hepatic Endoderm	-1.88757052835545	-1.84377655254461	-1.7816321171192	-0.544558348411889	-0.939954454591542	-0.778674265059195	1.35887439123876	1.30773784679086	1.90209275882506	1.01642576728895	1.00906744993157	1.18196805200668
ENSG00000153071	DAB2	Hepatic Endoderm	-1.22528600412645	-1.1200770043899	-1.24185375352725	-1.9327009153541	-1.23012073444205	-1.14992352353955	2.15079325033575	1.473502127805	0.941452170256361	1.00580706586784	1.13146449384441	1.19694282726995
ENSG00000145349	CAMK2D	Hepatic Endoderm	-2.28668591194077	-1.65650159217031	-2.42770598860652	-0.20628217343436	-0.157283395255646	0.267167090001281	1.72562502117105	1.28128343576818	1.47768365086261	0.81083908437132	0.608366078344946	0.563494700888205
ENSG00000113369	ARRDC3	Hepatic Endoderm	-0.838508978025921	-0.406939299565717	-1.42503376067196	-1.85791965196791	-1.84190251756286	-1.05883992099143	0.303900598390543	2.17079853676512	1.30919141888269	1.09118318040211	1.4745725358845	1.07949785846085
ENSG00000124839	RAB17	Hepatic Endoderm	-2.06583654233072	-1.74144719103616	-2.06583654233072	-0.162401881710294	-0.647322401921847	-0.249630392920303	0.353944978558636	1.8135258822292	1.7234551567152	0.542420941369852	1.36958575474822	1.12954223862894
ENSG00000070540	WIPI1	Hepatic Endoderm	-1.6491925814294	-1.43540718980737	-0.432065250802537	-1.49132491713251	-0.638390896468132	-1.68574190536547	1.62716547627157	1.74862757460036	1.36732070198502	1.66805744973298	0.876813225879229	0.044138312536262
FAM151A;RP11-240D10.4	NA	Hepatic Endoderm	-1.34149969589626	-1.34149969589626	-1.34149969589626	-1.34149969589626	-1.34149969589626	-0.897659804693474	0.790759027542902	1.06078736777642	2.26757989592203	1.59700828532568	1.00645561751485	0.882568090092882
ENSG00000072682	P4HA2	Hepatic Endoderm	-1.57371789457123	-1.1965635833732	-1.78562584845553	-1.30890677788098	-0.753039802893491	-0.728584846948145	1.62968207887604	2.26770410324638	1.08852723715493	0.912547229554543	0.673838362165829	0.774139743124853
ENSG00000123643	SLC36A1	Hepatic Endoderm	-1.34630434933346	-0.745588392253564	-1.35212203200474	-0.891580142465461	-1.05407485258747	-0.63179553493962	1.8570956241138	2.26982296829024	2.19679298294878	0.3467140767784	0.0484720232706195	-0.697432371817523
ENSG00000115677	HDLBP	Hepatic Endoderm	-0.682243847244388	-1.50368330952311	-0.790353241941726	-1.59512201527004	-1.16825217795976	-1.41780326603242	2.08489581499568	1.85346943263704	1.22939450670054	0.768340522186398	0.544010503247237	0.677347078204552
ENSG00000071205	ARHGAP10	Hepatic Endoderm	-1.19418676566112	-1.3851391442674	-1.39712406691586	-1.53923131539904	-1.17830821942273	-0.884252693415957	1.4646381026914	1.30760732386036	1.58606857565014	0.988881178124985	1.32356572155118	0.907481303204043
ENSG00000173482	PTPRM	Hepatic Endoderm	-2.19159259972849	-1.46333629632139	-1.97702867619128	-0.128646548220773	-0.61675299971539	-0.263672972150269	1.00792792713335	1.54557304216707	1.51160748274919	0.394822885915631	1.4066844532328	0.774414301129549
ENSG00000182890	GLUD2	Hepatic Endoderm	-1.10497651785397	-1.19667388019735	-1.06588714771175	-1.54462446017603	-1.37131015177315	-0.478780805074803	1.52152617925583	1.66419747174841	2.3499835337576	0.354640689503142	0.343236420325909	0.528668668196152
ENSG00000161944	ASGR2	Hepatic Endoderm	-1.25564210728294	-1.25564210728294	-1.25564210728294	-1.25564210728294	-1.25564210728294	-1.01672083375777	0.517158466753423	1.65419553705134	2.0560584380527	0.923599622121748	1.30732718050167	0.836592125691579
ENSG00000135677	GNS	Hepatic Endoderm	-1.30408827741803	-1.37349777062034	-1.12745750517568	-1.13444322449255	-0.852453490886943	-1.59686566468399	1.03566487083302	1.65871054141071	1.75456980095989	0.887416547114568	1.00016512065632	1.05227905230303
ENSG00000168743	NPNT	Hepatic Endoderm	-1.21216086239991	-1.42406881628421	-1.03768211798366	-1.42406881628421	-1.15009041134825	-0.980228925081427	2.17512591756454	1.11217660628181	1.08896891885321	0.480857563711953	1.23547416767398	1.13569677529617
ENSG00000085741	WNT11	Hepatic Endoderm	-1.31373376459978	-0.989344413305215	-1.31373376459978	-1.05577249406887	-1.03975535966382	-1.31373376459978	1.73092258876664	1.72209440579196	1.82260445708009	0.985300626700628	0.474790433813677	0.290361048684258
ENSG00000159200	RCAN1	Hepatic Endoderm	-0.832936403586126	-1.47151314450578	-1.58981222458732	-0.961473795486345	-0.763316450238306	-1.35206260459756	2.20287364641759	1.17830531847144	1.20069143119753	0.503131895500067	1.33715821670759	0.548954114707221
ETFB;CTD-2616J11.11	NA	Hepatic Endoderm	-1.42298126395685	-0.0077806027663021	0.233420262140442	-1.61824399177771	0.86151503361921	-1.21285917973667	-0.183189231304537	2.19129795969603	2.33003809394084	0.179841215734046	-1.20439665068278	-0.146661644905716
RP11-192H23.4;ALDOC	NA	Hepatic Endoderm	-0.829933727779367	-0.833171732180169	-0.853874688375063	-1.17549451570241	-0.708942602582312	-1.22714582420186	1.89884801529642	2.43276834022546	1.8455895626251	-0.264569863865103	-0.0599343739814131	-0.224138589479277
ENSG00000182670	TTC3	Hepatic Endoderm	-1.87648723576127	-1.98782774028957	-1.9728322187524	0.10252395582156	-0.437551022677231	0.179831638133767	1.30051094383409	1.42328701077726	0.967303622293941	0.462013232192704	1.1725124171095	0.666715397317651
ENSG00000119711	ALDH6A1	Hepatic Endoderm	-1.37130279155629	-0.901966218947696	-1.02567278301581	-1.24428900246994	-0.450468673774058	-0.688606130326717	0.687071565502373	2.39770097521603	2.19522879539802	0.704094265144003	0.380746507837418	-0.682536509007345
ENSG00000197747	S100A10	Hepatic Endoderm	-1.43415149044162	-1.09824149514164	-1.45304696342942	-0.809233038192088	-0.856478838569004	-1.2179519774705	1.63377825233495	1.49982148112972	1.83229296108675	0.735484120902807	0.184471231643477	0.983255756146561
ENSG00000151135	TMEM263	Hepatic Endoderm	-1.72814542844753	-1.47590067439729	-0.705366017935676	-1.16769082885037	-0.660275556351603	-1.1117106083654	1.75323233136404	1.74982901254778	1.3770208071555	0.649983395860457	0.775640823837024	0.543382743583075
ENSG00000244067	GSTA2	Hepatic Endoderm	-1.14509174365199	-1.14509174365199	-1.14509174365199	-1.14509174365199	-1.14509174365199	-1.14509174365199	0.81860427373969	1.00192974698314	2.42507757149623	1.0341499857527	0.950096001055005	0.64069288288515
ENSG00000172296	SPTLC3	Hepatic Endoderm	-0.860478788661848	-1.07238674254615	-0.686000044245598	-0.81442547201524	-1.07238674254615	-0.628546851343367	1.05987198089301	2.46742784930224	2.33071278643005	-0.595094596837303	0.0829134327162695	-0.21160681114591
ENSG00000122884	P4HA1	Hepatic Endoderm	-1.36195696995077	-1.96785546281603	-1.54685824049697	-0.620242287108928	-0.60028251774146	-0.216226853312641	0.88757085078409	2.03521343853826	1.50290639312575	0.350658693872085	0.924156800038774	0.612916155067843
ENSG00000137204	SLC22A7	Hepatic Endoderm	-0.692476724397368	-0.692476724397368	-0.692476724397368	-0.692476724397368	-0.692476724397368	-0.692476724397368	0.600481636648177	2.64197419642389	2.49617720923921	-0.692476724397368	-0.692476724397368	-0.198819247132322
ENSG00000168237	GLYCTK	Hepatic Endoderm	-1.13313131651744	-1.13313131651744	-0.927041045304407	-1.13313131651744	-1.13313131651744	-0.894210042992267	1.73172499118833	1.9904570337971	1.64184991531156	-0.297808257227311	0.473553009970948	0.813999661325797
ENSG00000175311	ANKS4B	Hepatic Endoderm	-1.07280291613845	-1.07280291613845	-1.07280291613845	-1.07280291613845	-1.07280291613845	-1.07280291613845	1.34697860475091	2.10646004233862	1.66754597940347	-0.237479856848324	0.533881410349935	1.01943131683607
ENSG00000138119	MYOF	Hepatic Endoderm	-1.93042887899803	-1.93042887899803	-1.72433860778501	-0.365866841783214	0.257129479388913	0.21429916232708	0.835360389288279	0.767033353964424	1.3812716663376	1.2766352239029	1.2026318335099	0.0167020988451974
ENSG00000147883	CDKN2B	Hepatic Endoderm	-1.13478392513045	-1.13478392513045	-1.13478392513045	-0.658064854555906	-1.13478392513045	-1.13478392513045	2.62748687098869	0.556272599367143	1.10830487362948	0.610569427020858	0.471900401357931	0.957450307844065
ENSG00000163377	FAM19A4	Hepatic Endoderm	-0.508375462781181	-0.536593040353246	-0.407099084248029	-1.09125568078653	-1.07523854638149	-0.905377060114662	0.61447906607423	2.21171091829218	2.35278073255357	-1.34921695131745	0.439307247096015	0.254877861966595
ENSG00000125845	BMP2	Hepatic Endoderm	-1.45419240003142	-1.66610035391572	-1.46001008270269	-0.101538316700899	0.307667423259767	0.840516451578798	2.8419795715509	0.170568409677657	0.11432719326462	0.238826026080444	-0.510800178653299	0.678756256591845
ENSG00000251562	MALAT1	Hepatic Endoderm	-1.77577145889769	-1.62592795489403	-1.50366983425264	-0.584411605347841	-0.480303437844499	-0.535683948889671	1.71926454929123	1.35464223878917	0.865497541890484	0.644338572639404	0.955288967658252	0.96673636985784
ENSG00000143845	ETNK2	Hepatic Endoderm	-0.909856796282298	-1.426308933524	-0.928752269270101	-1.27397921424402	-1.04811810390651	-0.824281516540418	1.20685724750228	1.67865044423919	2.08854200144903	0.428543444586124	0.812271002966044	0.19643269302467
ITGA1;PELO	NA	Hepatic Endoderm	-0.491444326031078	-1.34438751191433	-0.566168645460806	-1.2274458237275	-1.52613956923583	-1.56733593373757	1.60039964843694	1.19481876386721	0.940923081966385	1.07342797048318	0.921904775899455	0.991447569453936
ENSG00000052802	MSMO1	Hepatic Endoderm	-0.93055122290225	-1.07314216791932	-0.711373078318486	-1.31497450198138	-1.32592521712761	-1.50534974247003	1.26650364359178	1.38637702927321	1.28242568731311	1.04526527833113	0.691680464758499	1.18906382745133
ENSG00000143761	ARF1	Hepatic Endoderm	-1.15044221320285	-0.846591244001458	1.29608107425222	-0.715435171818816	1.94329894041973	-0.874317827297082	-0.989685417909957	2.02284031454814	1.07675429432127	-0.250122749821153	-0.973961793532858	-0.538418205957178
ENSG00000111554	MDM1	Hepatic Endoderm	-0.637061756405328	-0.482858189190827	-0.405731088117686	-1.03099751849092	-0.592357036529808	-0.482764671188598	0.337259588713144	2.24719476316066	2.73026771916905	-0.898806609213736	-0.162405970575713	-0.621739231330241
ENSG00000164406	LEAP2	Hepatic Endoderm	-0.701021683378475	-0.701021683378475	-0.701021683378475	-0.701021683378475	-0.701021683378475	-0.701021683378475	0.274877449507809	2.45067251960052	2.46171151852427	0.420911979395205	-0.701021683378475	-0.701021683378475
ENSG00000139793	MBNL2	Hepatic Endoderm	-1.35088409600365	-1.15846120535919	-1.20088988869228	-0.626689713930399	-1.04494328952946	-1.30368357923873	1.73171997521185	1.22668434383027	0.805974488278155	1.39694151124366	0.815445817343096	0.70878563684667
ENSG00000171094	ALK	Hepatic Endoderm	-0.69572694280341	-0.907634896687712	-0.907634896687712	-0.24100273593541	-0.633656491751752	-0.463795005484929	-0.338694822935066	2.27162806178936	2.53908061680634	-0.907634896687712	0.699049429800671	-0.413977419422666
ENSG00000166387	PPFIBP2	Hepatic Endoderm	-2.10211909601701	-1.65635296705276	-1.97165109110412	0.845518049800765	0.464819767799437	0.760533524262415	0.8779671300996	1.37585534497829	0.718288626549237	0.035674825079103	0.401667156267539	0.249798729337503
ENSG00000130066	SAT1	Hepatic Endoderm	-1.537262844424	-0.903876000571418	-1.27050306840723	-1.25312691473477	-0.890127192956036	-0.872352285835726	1.29595360780832	1.51314723263447	1.24269515513699	1.14720150352753	0.709146322524815	0.819104485297061
ENSG00000169905	TOR1AIP2	Hepatic Endoderm	-1.38866957674756	-0.637610123489995	-0.96535597300817	-1.3050815775699	-0.62036040411581	-1.5177567928054	1.39478603744524	1.48882684479097	1.7004614770547	0.789722966930453	0.515540480227748	0.545496641287718
ENSG00000059804	SLC2A3	Hepatic Endoderm	-2.02384464156529	-1.81824664526607	-1.24348577136524	0.678259789545316	0.665433398456231	0.404931636116088	0.993763308498397	1.46569840119481	1.51461660321631	-0.649355725114771	0.0457335717861787	-0.03350392550196
ENSG00000134962	KLB	Hepatic Endoderm	-1.02670850760277	-1.02670850760277	-1.02670850760277	-1.02670850760277	-1.02670850760277	-1.02670850760277	1.6327060993664	0.942213759402219	1.5267894511169	1.27232588369764	-0.531932250871342	1.3181481029048
ENSG00000141485	SLC13A5	Hepatic Endoderm	-0.606534361090378	-0.678784384233672	-1.00317373552824	-1.00317373552824	-1.00317373552824	-1.00317373552824	1.65624087144093	1.97103407874354	1.96377033689576	0.357759683281596	-0.508397478796813	-0.142393804127999
ENSG00000197241	SLC2A7	Hepatic Endoderm	-0.813011028853595	-0.813011028853595	-0.813011028853595	-0.813011028853595	-0.813011028853595	-0.574089755328426	0.479947332191951	2.06353145266795	2.45072272910005	-0.335718883144747	0.793673297634788	-0.813011028853595
ENSG00000225264	ZNRF2P2	Hepatic Endoderm	-0.82060796838261	-0.628185077738147	-1.21724734282047	-0.740528272245925	-1.21724734282047	-0.773407451617688	-0.648307269067825	0.687063120859115	2.57204435622545	0.528106009330839	1.13070797059064	1.12760926768709
ENSG00000073060	SCARB1	Hepatic Endoderm	-0.235827070068678	-0.77079848168988	-1.41610082465367	-1.25332007978594	-1.06503107761409	-1.45526944838758	0.181734680687228	1.34368977397247	1.85558480092265	0.9690172626988	0.826118568996376	1.02020189492231
ENSG00000151224	MAT1A	Hepatic Endoderm	-0.558986884229685	-0.942012444162772	-1.06031152424431	-1.26640179545734	-0.762264344827048	-1.02748052193217	1.01676925816143	2.31533481871727	1.78772410315632	0.478951556693972	-0.111101620194919	0.129779398319256
ENSG00000122194	PLG	Hepatic Endoderm	-1.06738539505687	-1.06738539505687	-1.06738539505687	-1.06738539505687	-1.06738539505687	-0.828464121531703	-0.0914862621705872	1.59142993627529	1.86928665859053	1.23164899624354	1.02780234965012	0.536709418227169
ENSG00000129691	ASH2L	Hepatic Endoderm	-1.51904504597906	-1.2836584187539	-1.38427799301692	-0.563763640269426	-0.0262412627002853	-0.630496999199956	0.246802366344601	1.89263534710382	1.96478177130379	0.845910574193479	0.435026071932927	0.0223272290409309
ENSG00000087086	FTL	Hepatic Endoderm	-0.602739479977118	-0.668041430550249	-0.987916375843239	-1.45942029370401	-1.25365092268924	-1.44706343118086	1.28424977164927	1.12521332043471	0.968253587263974	1.32447918898028	0.964884989207624	0.751751076408862
ENSG00000169242	EFNA1	Hepatic Endoderm	-0.863067875954512	-1.07497582983881	-1.07497582983881	-1.07497582983881	-1.07497582983881	-1.07497582983881	0.21798253120673	1.69680652460262	1.39643415738119	0.670377522312496	0.875013012196185	1.38133327744937
ENSG00000167434	CA4	Hepatic Endoderm	-0.670035422935576	-0.345646071641009	-0.670035422935576	-0.670035422935576	-0.670035422935576	-0.431114149410408	1.10276515110078	2.36579274745617	1.9984502830435	-0.670035422935576	-0.670035422935576	-0.670035422935576
ENSG00000091986	CCDC80	Hepatic Endoderm	-0.266289342531508	-0.104548215658808	0.20772518288975	-1.76248169307276	-1.74646455866771	-1.57660307240088	0.937112568717177	1.38576007955543	0.408102363748491	1.18662113929726	0.895199404439041	0.435866143684513
ENSG00000086696	HSD17B2	Hepatic Endoderm	-0.946632757152975	-0.946632757152975	-0.946632757152975	-0.946632757152975	-0.946632757152975	-0.946632757152975	-0.377692683400328	1.67247183629793	1.92752032845749	0.958293622843189	0.660051569335408	0.839151869384162
ENSG00000087074	PPP1R15A	Hepatic Endoderm	-1.50366996478435	-1.65401214603437	-0.677146954562829	-0.489606981850901	-0.346881085042469	-0.50992546689457	2.31937643249709	1.32613770471571	0.615417740598755	0.543841042882122	0.0963332307860405	0.280136447689762
ENSG00000095321	CRAT	Hepatic Endoderm	-0.993773468211238	-1.3904128426491	-1.3904128426491	-0.913693772074554	-1.11643443771314	-0.333371841141716	1.1541549240662	1.41714147705653	1.3845683891799	0.788828886755586	0.836687392186504	0.556718135194132
DAGLB;KDELR2	NA	Hepatic Endoderm	-1.08173410379046	-0.843241722156248	-0.719353819856758	-1.06783972346449	-0.871777348128755	-1.42928942967111	1.95512118613328	1.09100892134235	0.67333159985145	0.672567891840162	0.393141521435205	1.22806502646537
ENSG00000114268	PFKFB4	Hepatic Endoderm	-1.15660064134163	-1.22885066448492	-0.86239285395264	-0.718811315465493	-0.676241601005138	-0.376426038783408	-0.984299942026845	1.54168404063033	1.91479877417565	0.745794375520918	1.00972927200511	0.791616594728072
ENSG00000117448	AKR1A1	Hepatic Endoderm	-1.00516404762506	-0.967240306368688	-0.611221029839988	-1.3548554338189	-0.773677282440429	-1.2660384304712	0.892802894316973	1.64088931658333	1.46007223563904	1.06484814233087	0.109305711069147	0.810278230624892
ENSG00000164211	STARD4	Hepatic Endoderm	-0.798088616412721	-0.176381140515384	0.174670929164982	-1.87072502130485	-1.24772870013272	-1.61908090910925	0.910771504807372	1.11689104784277	0.826501086526778	1.15780180864529	0.716343713396763	0.80902429709097
ENSG00000187098	MITF	Hepatic Endoderm	-0.90640329869663	-0.793921901286366	-1.11831125258093	-1.11831125258093	-1.11831125258093	-1.11831125258093	1.64747801570538	0.647387705612336	1.173424146083	1.06093047682375	0.976876492126058	0.667473373956204
ENSG00000109099	PMP22	Hepatic Endoderm	-0.833610295700209	-0.905860318843504	-1.23024967013807	-1.23024967013807	-0.956271265202111	-0.991328396612903	1.05292138348069	1.1720373935346	1.57855199016124	1.06878472116234	0.719739171896929	0.555534956399065
ENSG00000198363	ASPH	Hepatic Endoderm	-1.16261904701586	-1.0889933387799	-0.816121518228577	-0.97822592891731	-1.02248149258854	-1.16216357103475	1.34274973968343	0.939945969296498	1.27197723724347	0.861929414306697	0.650681988626791	1.16332054740806
ENSG00000185624	P4HB	Hepatic Endoderm	-1.18205822072915	-0.971197545546145	-1.18860434788082	-1.0395401249766	-0.658580126293805	-0.877725678481013	1.31892498589007	1.46983800447352	1.54140792151228	0.447916615391492	0.256581857913374	0.883036658726807
ARFGAP3;PACSIN2	NA	Hepatic Endoderm	-0.8720401480697	-0.900257725641765	-0.770763769536547	-1.45492036607505	-0.83588322183161	-1.0896423268826	1.56537075108704	1.59683636472809	0.918283951420102	0.696756664613728	0.635073676805145	0.511186149383175
ENSG00000104765	BNIP3L	Hepatic Endoderm	-1.59128671316734	-0.873880630570111	-1.25069610842808	-0.669578536331763	-0.372466646116414	-1.07381115703327	0.847923338625043	1.12032488595479	1.46877813706032	1.24486491700194	0.699099423251494	0.450729089753389
ENSG00000169562	GJB1	Hepatic Endoderm	-0.958875485382122	-0.958875485382122	-0.958875485382122	-0.958875485382122	-0.958875485382122	-0.958875485382122	0.0170236475041623	1.13118800527587	1.74598922318539	0.946050894614042	0.647808841106261	1.26519230060702
ENSG00000077616	NAALAD2	Hepatic Endoderm	-0.778660200628781	-0.332894071664534	-1.13294908632971	-1.33903935754274	-0.834901906912451	-1.33903935754274	0.624656659848934	1.63516845672904	1.29212623048332	0.709554720621008	0.610949484492259	0.885028428446398
ENSG00000128595	CALU	Hepatic Endoderm	-0.272554157241912	-0.316266380131087	-0.0722383197744634	-2.04356552053255	-0.256679146791306	-1.98716729770151	1.06623065481185	1.01823014710199	0.830333037126563	0.703651209549314	0.537739600015945	0.792286173567167
RP11-99J16__A.2	NA	Hepatic Endoderm	-0.679063724799709	-0.679063724799709	-0.679063724799709	-0.679063724799709	-0.679063724799709	-0.44014245127454	0.613894636245836	2.09271862964173	2.19508936081075	-0.201771579090861	-0.679063724799709	-0.185406247534663
ENSG00000084234	APLP2	Hepatic Endoderm	-1.63936022947977	-1.75451439245019	-1.49466895320226	-0.11874265545894	0.0273099277026656	0.155086477767396	0.516067082783406	1.22060962139463	1.17259876307624	0.650323922539249	0.574407911947239	0.690882523380328
ENSG00000282230	ADAM9	Hepatic Endoderm	-1.03327716929876	-0.859705189990554	-1.22633225782637	-1.2089561041539	-0.940397783913772	-0.611936222819658	0.779760261665793	1.32742673390056	1.28686596571786	1.23253594493374	0.56441389958428	0.689601922200787
ENSG00000142583	SLC2A5	Hepatic Endoderm	-0.851848887974724	-0.851848887974724	-0.851848887974724	-0.851848887974724	-0.851848887974724	-0.612927614449555	1.11184712941695	1.76725570547618	1.98999849073144	-0.0165258286845993	0.0106655139576901	0.00893104342551698
ENSG00000091136	LAMB1	Hepatic Endoderm	-1.40064603156196	-1.35685205575112	-1.33977831459121	-0.641305948897327	-0.594648275059371	-0.371842706934025	1.29270832596995	1.17085558206853	0.973733035855608	0.57564185823052	0.781003981982836	0.911130548687567
ENSG00000168172	HOOK3	Hepatic Endoderm	-1.64795400600376	-1.0118175844624	-1.32068499542511	-0.474185032655496	-0.51364896191951	-0.68321545291569	0.827683054524577	0.668694348703749	1.51687685416241	0.801030665673041	1.03007458825912	0.807146522059063
ENSG00000109193	SULT1E1	Hepatic Endoderm	-0.910141375268085	-0.910141375268085	-0.910141375268085	-0.910141375268085	-0.910141375268085	-0.910141375268085	0.862659198768275	0.926527388325291	2.02653067837931	0.655768356896157	-0.0476269733356713	1.03698960257515
ENSG00000134240	HMGCS2	Hepatic Endoderm	-1.02233515979957	-1.02233515979957	-1.02233515979957	-1.02233515979957	-1.02233515979957	-0.578495268596782	0.270623201245979	1.23226999239406	1.64615054617951	0.543574572364677	0.927653682235434	1.06989907317495
ENSG00000118680	MYL12B	Hepatic Endoderm	-0.164638015137466	-0.22192665011981	0.234255046125658	-1.57629128996966	0.587848691037587	-2.26317551292577	0.67855962778478	1.11105514749828	0.879193688237191	0.98882553656041	0.410213259162068	-0.663919528253273
ENSG00000127241	MASP1	Hepatic Endoderm	-0.785426684914857	-0.857676708058152	-0.635432477603486	-1.18206605935272	-1.18206605935272	-0.94314478582755	0.781629958038957	0.964955431282406	1.06102273940722	1.42619142434786	1.38090322843189	-0.0288900063988433
ENSG00000111802	TDP2	Hepatic Endoderm	-1.0006913273016	-0.587530403553973	-0.928495264215783	-0.8209901067689	-1.3036824007643	-0.790569243081428	0.863975537827773	1.22552222762045	1.97996558129862	0.517492262471422	0.569374844718185	0.275628291749531
ENSG00000172572	PDE3A	Hepatic Endoderm	-0.572144015581057	-0.745988217939896	-0.168974936392294	-1.49417223328719	-1.04955332290605	-1.51321223029293	0.667648017071257	1.15770414051618	1.18453854982929	0.546900887482307	1.08308987913861	0.904163482361777
ENSG00000139182	CLSTN3	Hepatic Endoderm	-1.29936988284658	-1.65030590168293	-1.58819198704985	0.0508624531938162	0.0469353872739546	-0.207058875560545	0.711019147413653	1.4492582833059	1.35445218058323	0.557726444189795	0.441807048435025	0.132865702744524
ENSG00000128590	DNAJB9	Hepatic Endoderm	-1.45178155742909	-1.15305118277854	-0.43525932418647	-0.502167213157112	-0.986180706068696	-0.982382491660659	1.83957967356119	0.846150489567773	0.615784763172253	0.623615499271201	0.756445899385967	0.829246150322175
ENSG00000197448	GSTK1	Hepatic Endoderm	-1.10638738152264	-0.85264285759549	-1.23982429353374	-0.936742328597165	-0.654752594991554	-0.791830588145936	1.47368438816222	1.20073779896942	1.28609662935198	0.330421081522005	1.01687319969588	0.274366946685022
ENSG00000135535	CD164	Hepatic Endoderm	-1.46076054531873	-1.25516254901951	-0.85982217414194	-0.637179762774855	-0.569968932367033	-0.9967133445317	0.897145333930808	1.05965356755938	1.23056722626548	1.01630226434186	0.765513248025394	0.810425668030853
RP11-302B13.5;FKBP11;AC073610.5	NA	Hepatic Endoderm	-0.637998930990753	-1.15445106823245	-0.5367225524576	-1.00212134895247	-0.974702968896727	-1.03500052832423	1.38601588817875	1.29294193491442	1.65749780215285	0.569753658636732	0.127843906961366	0.306944207010119
ENSG00000117385	P3H1	Hepatic Endoderm	-0.879079777442048	-0.8171074887358	-0.909296254043936	-1.16747345772841	-0.910542967965725	-1.05733569190557	1.07670044463048	1.50682969653121	0.678467146821427	1.12678572851784	0.499827313993727	0.852225307326806
ENSG00000160145	KALRN	Hepatic Endoderm	-0.52873523516518	-1.30826761397145	-0.955212011984361	-0.912603118637588	-1.02033146427942	-0.970913110775634	1.14732647431265	1.13849829133797	1.09926404794409	0.281911850350908	1.09448444097725	0.934577449890782
ENSG00000151388	ADAMTS12	Hepatic Endoderm	-0.605615524441973	-0.673001513669052	-0.699638321011723	-0.832098167947829	-1.31611166085941	-0.913229716838818	0.637669218092456	1.7327489014445	1.57680170439084	-0.079489122227768	1.10132603493585	0.0706381681329225
ENSG00000104805	NUCB1	Hepatic Endoderm	-0.912734280688311	-1.05752970091953	-0.941619492005969	-0.960216022216957	-0.71345051644585	-1.13466648697456	0.432777472889067	1.4202979097162	1.31446222683581	0.908609648568731	0.736925191871557	0.907144049369801
ENSG00000073008	PVR	Hepatic Endoderm	-1.02836210852265	-1.09777160172496	-0.851731336280301	-0.858717055597174	-1.22691847282881	-0.61792368649331	0.940739465763255	1.18063677734858	1.18399960508893	1.040548094082	0.244038425807941	1.0914618933565
ENSG00000059573	ALDH18A1	Hepatic Endoderm	-1.30199922962952	-0.797716963331488	-0.2949960071251	-0.521040097380243	-0.542274891295258	-1.08815134484766	1.08344175274571	1.75825482323677	1.09315839368142	-0.904031903033905	0.650677046198968	0.86467842078031
ENSG00000086062	B4GALT1	Hepatic Endoderm	-1.23211845889411	-1.30436848203741	-1.08212425158274	-0.269067124562224	-0.101568267720369	-0.142764632222116	1.49803880820794	1.24778464818957	1.65915865936012	-0.506824170558295	0.466429911375017	-0.23257663955538
ENSG00000171067	C11orf24	Hepatic Endoderm	-0.807677589008271	-0.999520749060624	-0.59311366547106	-0.710512292111076	-0.649082667285263	-1.11923123138948	-0.0440135094577094	1.92107597927312	1.74255494603611	0.431985250803708	0.658951150059849	0.168584377610696
ENSG00000210156	MT-TK	Hepatic Endoderm	-0.565306208531481	-0.460097208794935	-0.726087538009901	-0.151887363248023	-0.998742714823174	-0.48994372794458	2.92919492605485	0.492977838434134	0.0266218973265384	0.472632232392176	-0.117420944496714	-0.411941188358893
ENSG00000146833	TRIM4	Hepatic Endoderm	-1.30189054313144	-0.489266632167241	-1.30189054313144	-0.635258382379139	-0.424892128357087	0.0882210293257821	0.250847159871814	1.64049116494109	2.03320830535944	-0.466567483841316	0.304793783356942	0.3022042701526
ENSG00000259974	LINC00261	Hepatic Endoderm	-1.28797982170846	-1.28797982170846	-1.28797982170846	0.889676033908583	0.340269207301424	-0.000578715709344202	-0.312080688822174	1.2902899671253	1.90067411192812	0.0729535971013773	-0.425465419776045	0.108201372068137
ENSG00000003096	KLHL13	Hepatic Endoderm	-0.68589014545851	-0.758140168601805	-0.535895938147139	-1.08252951989637	-1.08252951989637	-0.843608246371204	-0.513589446143726	1.17207563229726	1.69245171193262	0.48338021226787	1.14457071493923	1.00970471307815
ENSG00000013375	PGM3	Hepatic Endoderm	-1.47097778821415	-0.818254719215764	-0.891940572955318	-0.876875143207397	-0.62541102817969	-0.696444391958543	1.51122614075093	1.5180368539191	0.926636633956481	0.388984601363022	0.519321578998632	0.515697834742697
ENSG00000010932	FMO1	Hepatic Endoderm	-0.773490614700676	-0.773490614700676	-0.773490614700676	-0.773490614700676	-0.773490614700676	-0.773490614700676	-0.773490614700676	1.13081984897891	2.03531104559863	0.792419117463566	0.833193711787707	0.622690579075919
ENSG00000112972	HMGCS1	Hepatic Endoderm	-0.494212558282704	-0.345997344457772	0.886356480998637	-1.64649018300526	-0.656264685141458	-1.82957903623194	0.303702115681883	1.2492912575061	0.932624204375283	0.926256327499842	0.307386176982267	0.366927244075121
ENSG00000117305	HMGCL	Hepatic Endoderm	-0.991030393719037	-1.3876697681569	-0.841036186407666	-0.721037607404597	-0.214654005568853	-0.461252999878755	0.385130805879462	1.70725428825292	1.74866845352297	0.791571961247787	-0.232369592894479	0.216425045127142
RASGEF1B;RP11-689K5.3	NA	Hepatic Endoderm	-0.607583572696555	-0.781427775055394	-0.845455193864185	-0.953144360619603	-1.28343561030331	-0.861156292655458	0.978216207352712	1.41874169917883	1.23807361625828	0.261021017230147	1.27659234826491	0.15955791690963
ENSG00000118257	NRP2	Hepatic Endoderm	-1.44520185415103	-1.39327449561625	-1.56652527098257	0.420085972096591	0.297248650742634	-0.262421379008524	0.933052750141458	1.25426954530054	0.96131286561568	-0.423539407323513	0.410486913884011	0.81450570930098
ENSG00000101670	LIPG	Hepatic Endoderm	-1.32350072720701	-1.32350072720701	-0.632653565380156	-0.656868566454706	-0.620920546294953	-0.266459725699624	0.449299846829352	1.21274469535901	1.94023303074664	0.0374326916028274	0.903599507628596	0.280594086077032
ENSG00000059728	MXD1	Hepatic Endoderm	-1.23596954674191	-1.23596954674191	-0.689335964992674	-0.569337385989606	-0.533389365829852	-0.997048273216739	0.896289176697252	1.53581280769953	0.401212068604265	1.27639369538326	0.991130688093697	0.160211647034687
ENSG00000180992	MRPL14	Hepatic Endoderm	0.115773147050829	0.114401429769418	0.915543754470616	-1.30653191468883	1.2854222492657	-1.21803935263822	-0.0719556085109012	1.20379424326967	0.753321052790715	-0.0957032405340268	0.12024210957135	-1.81626786981631
ENSG00000147573	TRIM55	Hepatic Endoderm	-0.798923102120142	-0.798923102120142	-0.798923102120142	-0.540961831589231	-0.798923102120142	-0.798923102120142	1.33333562131902	1.60336396155253	1.44416569663979	-0.798923102120142	0.356377073142279	0.597258091656454
ENSG00000015413	DPEP1	Hepatic Endoderm	-0.701050630990551	-0.701050630990551	-0.701050630990551	-0.701050630990551	-0.701050630990551	-0.701050630990551	-0.132110557237905	1.79190947233929	1.89180373483616	-0.223758485281703	-0.206274374259125	1.08473399554659
ENSG00000070495	JMJD6	Hepatic Endoderm	-0.945921259097916	-1.16315758366385	-0.913263267570571	-0.707400274988312	-0.464829874978786	-0.642272317314423	2.1615721450969	1.24523964945144	0.218194065144642	0.519535699590201	0.325221992010634	0.367081026320045
ENSG00000117616	RSRP1	Hepatic Endoderm	-1.00689815412619	-0.522090985573951	-0.593503553802344	-0.441286077252615	-0.896251502321173	-0.802735783459235	0.507854708670259	1.80081871692661	1.96926182741188	-0.43970020346497	0.296700435173053	0.127830571818672
ENSG00000145817	YIPF5	Hepatic Endoderm	-1.25100091410683	-0.733405281202674	-1.07437014186448	-0.966864984417601	-0.69830666417747	-0.666028921874025	1.7569384725025	0.515905035824303	0.836177508715391	0.683921406693337	0.935147558115983	0.661886925791565
ENSG00000125787	GNRH2	Hepatic Endoderm	-0.470093801139123	-0.470093801139123	-0.470093801139123	-0.470093801139123	-0.470093801139123	-0.470093801139123	-0.470093801139123	2.3374605185665	1.8687012360933	-0.470093801139123	0.0246824555923038	-0.470093801139123
ENSG00000176273	SLC35G1	Hepatic Endoderm	-1.142377387067	-0.729216463319368	-1.07018132398118	-0.578441650840548	-0.903852734895168	-0.932255302846823	0.955885512388956	0.910501763529266	1.6571125003246	1.00229256726228	0.240602412480561	0.589930106964426
ENSG00000167306	MYO5B	Hepatic Endoderm	-0.866631117290085	-1.11841034074402	-1.16083902407712	-0.462272773820354	-0.830474191051995	-0.924695214011795	0.575698447792415	0.785487497503497	1.40197870940304	0.471769123578337	0.64048270758476	1.48790617513332
ENSG00000109046	WSB1	Hepatic Endoderm	-1.08538249328038	-1.29473444894628	-1.07016365237199	-0.419867409338279	-0.217110135315347	-0.408958389672063	0.576399540323416	1.54837624777055	1.84183679603274	-0.128695769224725	0.412309859571638	0.245989854450721
ENSG00000156411	C14orf2	Hepatic Endoderm	-0.570845944326281	0.86752466214566	0.647994052528637	-1.02177644012824	1.09866902640403	-1.43921789963881	-0.0603547930429071	1.24264177376198	1.26139321279963	-1.17985774859736	-0.577255787337561	-0.26891411456879
ENSG00000198947	DMD	Hepatic Endoderm	-0.692483034492918	-1.18023528103796	-1.11285621476924	-0.15709938869825	-0.657384780949232	-0.84527951099623	0.632122301821261	1.60512382714024	1.79336497572086	0.0037101527636727	0.47052595330733	0.140491000190455
ENSG00000122378	FAM213A	Hepatic Endoderm	-0.596175975882168	-0.422603996573959	-0.279354049707363	-0.387620395043561	0.554972162308448	-0.109401889946475	-2.13154561950706	1.78104769458672	1.29352672187444	-0.226619239510895	0.0955546153285454	0.428219972073324
ENSG00000064042	LIMCH1	Hepatic Endoderm	-0.22766090457352	-0.869427687567993	-0.99120443670534	-1.20533252795765	-0.979471417620137	-0.625010597024808	0.281644418859484	1.52426316158024	1.40000219906513	0.616982792768218	1.15317178442453	-0.0779567852481517
ENSG00000126218	F10	Hepatic Endoderm	-0.880463460122853	-0.880463460122853	-0.880463460122853	-0.880463460122853	-0.606485055186893	-0.257224150399491	-0.311523386370207	1.9619972688888	1.54808186722931	0.480469958686983	0.72622086636553	-0.0196835287226125
ENSG00000033170	FUT8	Hepatic Endoderm	-1.86510496102319	-0.997004826626358	-1.45376089823659	0.193421386971199	0.237487794342242	-0.245794029944059	0.251609082761386	1.28652206229747	1.24352553836196	0.438518532125709	0.555756801743876	0.354823517226362
ENSG00000133103	COG6	Hepatic Endoderm	-0.942804050900396	-0.781062924027696	-0.784675681009439	-0.871074360852621	-0.885630128986628	-1.2109644708627	0.958668876792826	1.4708952025381	0.706141857003641	0.837535188608848	0.94167942854418	0.561291063151886
ENSG00000060566	CREB3L3	Hepatic Endoderm	-0.848630362959976	-0.848630362959976	-0.848630362959976	-0.848630362959976	-0.848630362959976	-0.848630362959976	0.924170211076385	1.77047423049093	1.1815953662585	0.896722989191334	0.306669812302444	0.0121495684402646
ENSG00000111348	ARHGDIB	Hepatic Endoderm	-0.839062488652725	0.167082797225483	-0.839062488652725	-0.839062488652725	-0.839062488652725	-0.839062488652725	1.70550527806258	0.926636469540544	0.871519233056089	1.34017924075196	0.0234519132796893	-0.839062488652725
ENSG00000150403	TMCO3	Hepatic Endoderm	-0.993731451801933	-1.33786708671932	-1.11495492991481	-0.695335824339624	-0.491283790113326	-0.566061283505476	1.44902815905521	0.69124682212396	1.27482385976078	0.755394548641421	0.250545328087602	0.778195648725514
ENSG00000147576	ADHFE1	Hepatic Endoderm	-0.474237129542605	-0.870876503980467	-0.324242922231234	-0.612915233449556	-0.596898099044507	-0.427036612777683	-0.870876503980467	2.03896114035381	1.72197786184625	-0.393584358271619	0.284423671281953	0.525304689796128
ENSG00000120805	ARL1	Hepatic Endoderm	-0.968342180398327	-0.815577663923647	-0.942459296500712	-0.305872660055722	-0.66011094186083	-1.42643541010949	1.21162921490108	1.41178001984316	1.05212508661769	0.520959096781157	0.349274640083983	0.573030094621662
ENSG00000023839	ABCC2	Hepatic Endoderm	-0.642066566042754	-0.853974519927057	-0.853974519927057	-0.853974519927057	-0.853974519927057	-0.853974519927057	2.01088178777871	0.758365988325687	0.241250377439326	0.506958898882779	0.301325655335363	1.09315645791618
ENSG00000111859	NEDD9	Hepatic Endoderm	-1.14889698337554	-1.53192254330862	-1.16546473277634	-0.0304285834832543	0.263443077352908	-0.195785123289862	1.79931465416219	1.17951627578856	-0.219130279257017	0.442722496697221	0.238875850103802	0.36775589138595
ENSG00000137269	LRRC1	Hepatic Endoderm	-0.750663502994598	-1.00244272644854	-0.649387124461446	-0.757076291216864	-1.3175265865949	-0.534463990023478	1.17428427675545	0.901455111798984	1.0396605964952	-0.230571572721026	0.971464296253744	1.15526751315747
ENSG00000251369	ZNF550	Hepatic Endoderm	-0.618923245258897	-0.890149903853586	-0.172358045261521	-1.06186648941779	-0.084967646745866	-0.71948121273571	-0.123494615695433	2.22966966640719	1.43880365875908	0.402739201568617	-0.107770991318334	-0.292200376447753
ENSG00000124570	SERPINB6	Hepatic Endoderm	-1.55988913077263	-0.268369127538321	-0.432133130459992	-0.663093185549449	0.38871980887232	-0.573398648113542	-0.467276388266611	1.76616212430675	1.54561737861548	0.773329902649881	-0.47297212987236	-0.0366974738715271
ENSG00000130733	YIPF2	Hepatic Endoderm	-0.805497425188386	-0.776814317020021	-0.543930566553884	-1.10791531157143	-1.09189817716639	-0.742637272378983	1.83863451980244	0.603045684902642	0.544849788792661	0.933157809198065	0.422647616311115	0.726357650872172
ENSG00000142973	CYP4B1	Hepatic Endoderm	-0.558243972358852	-0.558243972358852	-0.558243972358852	-0.558243972358852	-0.558243972358852	-0.319322698833683	0.417655160527433	2.02002581647491	1.87030135499331	-0.0809518266500038	-0.558243972358852	-0.558243972358852
ENSG00000101782	RIOK3	Hepatic Endoderm	-1.40096407985144	-0.681259831846221	-1.04303854387627	-0.774231327758288	-0.0695736146932084	-0.868279817269795	1.33305070473213	1.12705523645051	1.13448230822096	0.82819653914075	0.36680031855996	0.047762108190911
ENSG00000184840	TMED9	Hepatic Endoderm	-0.878883326990056	-0.876833917056651	-1.22418975473715	-0.806585692893958	-0.90114028558405	-0.489269225341705	1.03809357480761	1.30980718038791	1.3064951698925	0.571124528015815	0.530376682439713	0.421005067060025
CALML4;RP11-315D16.2	NA	Hepatic Endoderm	-1.11598369130932	-0.526921426226999	-0.294037675760863	-0.858022420778413	-0.611846240679033	-0.492744381585962	1.16718736230944	1.4202617312567	1.72586368739684	-0.280660632019199	-0.621207434577897	0.488111121974717
ENSG00000102038	SMARCA1	Hepatic Endoderm	-1.27490769653779	-1.25919611378268	-0.766351921328123	-0.501931058312278	-0.575894998187112	-0.887037868408184	0.800654978086329	1.03774950617111	1.05912282677857	1.08233023266847	0.609731276728443	0.675730836123233
ENSG00000105514	RAB3D	Hepatic Endoderm	-0.788867426308458	-1.00077538019276	-1.00077538019276	-0.74281410966185	-0.49663792956247	-0.556935488989977	-0.431835306440114	1.40151168347991	1.4277699471594	0.360158038617075	0.605908946295622	1.22329240579638
ENSG00000070081	NUCB2	Hepatic Endoderm	-1.14700657933295	-0.262541407883572	-0.434265395630089	-1.38380219704925	-0.674313490381408	-0.998353327733441	0.118412173456441	1.37893218622239	0.812852463694149	1.03138596434506	0.614402638549973	0.944296971742691
ENSG00000112245	PTP4A1	Hepatic Endoderm	-0.406878602953458	-0.702651052573814	-0.493338583284909	-1.05301702156643	-0.991587396740616	-1.34196298535614	1.5229799543733	0.517051208039525	0.99098556752786	1.01571589822918	0.473037357678803	0.469665656626695
ENSG00000101076	HNF4A	Hepatic Endoderm	-1.15326736819937	-1.15326736819937	-1.15326736819937	-0.676548297624828	0.265246772209503	-0.70942747699659	0.399470334803881	0.993754122435751	1.68858001050679	0.412642363964868	0.635256830214086	0.450827445084666
ENSG00000183840	GPR39	Hepatic Endoderm	-1.21312478682411	-1.60976416126197	-1.40367389004894	0.743994300323336	-0.436748398673927	0.412379568298611	0.673406892356791	0.644840990931658	1.23208321744419	0.295162218734191	0.485423583445018	0.176020465275164
ENSG00000174804	FZD4	Hepatic Endoderm	-1.15103071810227	-1.53405627803536	-1.31181204758069	-0.293883592115106	-0.331256063718322	-0.1979188580166	0.686122137385377	0.876655184576876	1.10849844309407	0.74981185437065	0.601018581291431	0.797851356849953
ENSG00000077092	RARB	Hepatic Endoderm	-1.07806279538648	-1.47470216982434	-1.08831547152379	-0.115011461054592	-0.173721556390242	-0.851462860100981	0.488993847567333	0.727113751161405	1.30027906200465	0.704539559580343	0.475286672210657	1.08506342175604
ENSG00000144747	TMF1	Hepatic Endoderm	-1.13431978984358	-0.946196044855636	-0.730454318631717	-0.546703709682129	-0.336114497088488	-0.58929411585574	1.91008706455651	1.47013144743448	0.394855610203383	0.29798993433418	-0.0665667368152292	0.27658515624397
ENSG00000152137	HSPB8	Hepatic Endoderm	-0.5724907677348	-0.600708345306865	-0.866698674521831	-0.746700095518762	-0.710752075359009	-0.35629125476368	2.49543897504177	0.490978207408522	-0.212441377534058	0.332021095880246	0.375191942142396	0.372452370266072
ENSG00000132670	PTPRA	Hepatic Endoderm	0.0555482814987158	-0.69021061753923	-0.851072200699881	-0.762411302854141	-0.695008984331711	0.000280278176878923	-0.374077803878479	1.51688361776287	2.00178560744399	-0.760983175166328	0.409305840725071	0.149960458862242
ENSG00000067167	TRAM1	Hepatic Endoderm	-0.959226058033412	-0.755143926998472	-1.31908428545401	-1.10550989599109	-0.522662682800378	-0.313562538997562	1.24150555260422	0.687672756879619	1.13072784709413	0.439207263103809	0.917702062745968	0.558373905847171
ENSG00000183087	GAS6	Hepatic Endoderm	-0.974079634652374	-1.53445879156633	-0.987825209817101	-0.174768082796583	-0.361443028978288	-0.75168139975178	0.597799931872826	1.16300344139613	1.17040591700117	0.37046758842983	0.560728953140658	0.921850315721847
ENSG00000140391	TSPAN3	Hepatic Endoderm	-0.62957918342932	-0.668874524310249	-0.655859272220633	-1.16374512700392	-0.103341129316239	-1.21539643550336	1.20633727458687	1.43117490173983	0.742175068224005	0.699999250692154	-0.391489500829536	0.74859867737041
ENSG00000112494	UNC93A	Hepatic Endoderm	-0.69811615039273	-0.910024104277033	-0.910024104277033	-0.910024104277033	-0.910024104277033	-0.671102830751864	0.382934256768512	1.18003938638095	1.3330646944829	1.13856997388672	0.48854999723408	0.486157089499562
ENSG00000120915	EPHX2	Hepatic Endoderm	-0.196590987478073	-0.448370210932012	0.0156124437537968	-1.03743247601434	-1.03743247601434	-0.798511202489168	0.255525885031208	1.99839569437741	1.34693551625868	0.0845011867593435	0.361141625496777	-0.54377499874929
ENSG00000163659	TIPARP	Hepatic Endoderm	-0.795789441836951	-1.5032043530646	-0.561086485995187	-0.668775652750605	0.308123189921324	0.237260984604188	1.84520272152484	1.19425787989785	0.407522017830403	-0.667881293774479	0.103479973423779	0.100890460219436
ENSG00000105707	HPN	Hepatic Endoderm	-1.21986370784587	-1.10738231043561	-0.489653794660759	-0.955052591155629	-0.258755899142129	-0.648994269915621	1.11279610498513	1.14649812710358	1.12172629698949	0.977866639489517	-0.0331975602190622	0.354012964806961
ENSG00000165813	CCDC186	Hepatic Endoderm	-0.279959810219216	0.125483758677344	0.346116530328879	-1.58121885147001	-0.0937621408045697	-1.006616623197	1.66121098437519	1.29711210628475	0.641162276052667	-0.0237550660362729	-0.359432566318643	-0.726340597673117
ENSG00000120686	UFM1	Hepatic Endoderm	-0.885666191120653	-0.352656405102098	-0.75139952005671	-0.746679339285192	-0.0752564173355745	-1.19476550257599	1.33263729616909	1.33710247262721	1.40834419882371	0.164960959526907	0.0679689124941136	-0.304590464164801
RP11-216L13.17;CCDC183;RP11-216L13.19	NA	Hepatic Endoderm	-0.665609324177229	-0.665609324177229	-0.665609324177229	-0.665609324177229	-0.665609324177229	-0.665609324177229	0.310289808709055	1.68911058109805	1.1814381480123	-0.665609324177229	0.196905077755185	1.281521653666
ENSG00000144867	SRPRB	Hepatic Endoderm	-0.071904009428934	-0.52574281798845	-0.402974390453511	-1.31213548724541	-0.609342468274169	-1.5211659075056	1.33138635822604	1.13726208109982	0.768313987588599	0.671409334683541	0.192124133669211	0.342769185628865
ENSG00000187210	GCNT1	Hepatic Endoderm	-1.40755059538511	-1.37886748721674	-1.58154305399851	0.440056311308185	0.517761549789548	0.289777545480252	-0.00423373490739021	0.803852602142368	0.906223333311397	0.331104639001345	0.595039535485541	0.488379354989115
ENSG00000138315	OIT3	Hepatic Endoderm	-0.617960923672696	-0.617960923672696	-0.617960923672696	-0.617960923672696	-0.617960923672696	-0.617960923672696	0.674997437372849	2.04085440765947	1.22908654851684	0.503972739100985	-0.123184666941269	-0.617960923672696
ENSG00000107819	SFXN3	Hepatic Endoderm	-0.66270369287955	-0.874611646763853	-0.668521375550824	-0.616650376232942	-0.874611646763853	-0.874611646763853	0.898188927272508	1.21545184389414	1.41712375190008	0.69129808540039	-0.379835390032426	0.729483166520188
ENSG00000171914	TLN2	Hepatic Endoderm	-0.794563029839201	-1.31965486410744	-0.788452975780628	-0.676133085516777	-0.549031830236789	-0.516714943306501	0.243693833601061	1.19572204987913	1.3815746731893	0.524469514979748	1.10271816038881	0.196372496749284
ENSG00000102580	DNAJC3	Hepatic Endoderm	-0.944030583772149	-0.671448247757324	-1.46782111066807	-0.742939188848285	-0.579418891274524	-0.446834253861502	0.822800422812153	0.795810115663985	1.37843844675357	0.635801284025239	0.611679594183946	0.607962412742966
ENSG00000066933	MYO9A	Hepatic Endoderm	-0.755971180767496	-0.431610814628249	-0.933560456279856	-0.783789699595923	-1.13983834166145	-0.954825753985695	0.837433432597448	1.055818887849	1.16826063672273	0.569658144785135	0.550995364935471	0.817429780028888
ENSG00000163297	ANTXR2	Hepatic Endoderm	-0.76201329314328	-0.572136879103924	-0.883336709974827	-1.20495653730218	-1.16238682284182	0.105342803708938	1.00527111575025	1.08420311269835	0.432024749603826	1.28527420495015	0.0558025070908146	0.616911748563703
ENSG00000100934	SEC23A	Hepatic Endoderm	-0.89162997589615	-0.727893246125851	-0.452253107294927	-0.683523339718679	-0.664742343811317	-1.1473678851197	1.5857604946472	1.32204734035098	0.650724031380791	0.511120173075065	0.111027286211231	0.386730572301348
ENSG00000241684	ADAMTS9-AS2	Hepatic Endoderm	-0.871483243754585	-0.547093892460018	-0.871483243754585	-0.871483243754585	-0.367345793124294	-0.632561970229416	0.104415889131699	1.62147685957526	1.1002297288524	0.489450175055251	1.22370450095241	-0.377825766489539
ENSG00000118473	SGIP1	Hepatic Endoderm	-0.861967377397217	-0.749485979986953	-0.527241749532287	-0.597156260706974	-0.79989692634556	-0.834954057756351	0.219083029764025	1.01618815937647	1.35466999607064	-0.238552271991396	1.48909395650309	0.53021948200252
ENSG00000130005	GAMT	Hepatic Endoderm	-0.784680291149293	-0.996588245033596	-0.449954663284363	-0.738626974502685	-0.722609840097636	-0.757666971508427	0.776212329002765	0.249302705745541	1.90916295433491	0.748765107117714	0.610096081454787	0.15658780792028
RP11-6N17.9;CDK5RAP3	NA	Hepatic Endoderm	-1.25062751602179	-0.873473204823769	-0.640589454357632	-0.102844761136343	-0.289519707318048	0.113362236702548	0.0902022330971612	1.84718253142796	0.829199928757835	-0.985243324197246	0.632652274800898	0.629698763068424
ENSG00000145632	PLK2	Hepatic Endoderm	-0.44328983620691	-0.547217217251103	-1.01764642694811	-0.643151503014272	-0.337425042489366	-0.560941603284176	2.05754180028882	1.32058324327469	0.255141097653425	0.336439694637627	-0.0849348860649028	-0.335099320595722
ENSG00000146733	PSPH	Hepatic Endoderm	-0.272502393193244	-0.460229097588629	0.0733697626882757	-0.849166403783835	-0.821205942961378	-0.902170872520597	-0.0479357651475532	1.05099321646583	2.23078430903416	-0.18095940925952	0.106704831923844	0.0723177643426496
ENSG00000152601	MBNL1	Hepatic Endoderm	-0.378022502897662	0.199571902778866	-0.624917625154124	-1.29774742365582	-0.959160361381776	-1.20575935569168	1.28313180336174	0.962747932440001	1.00416209771005	0.476081359730754	0.215779189441287	0.324132983318359
ENSG00000113889	KNG1	Hepatic Endoderm	-0.693687099752244	-0.693687099752244	-0.693687099752244	-0.693687099752244	-0.693687099752244	-0.693687099752244	0.599271261293301	0.747032418888371	1.97479860622683	0.872222632411998	0.16882730218017	-0.200029622487198
ENSG00000143158	MPC2	Hepatic Endoderm	-0.497284043611633	-0.396087338855907	-0.8819916608653	-1.09611975211761	-1.06870137206186	-0.646422054414008	0.846942698197208	1.12462341027031	1.33291237667636	0.475755255471597	0.775116490718957	0.0312559905918883
ENSG00000148175	STOM	Hepatic Endoderm	-0.166241729042953	-0.917407156828905	0.341362059302337	-0.983835237592562	-0.967818103187512	-0.315379739845329	1.62305979958229	1.25116359520637	0.149707152030962	-0.119862845349792	0.853391236583519	-0.748139030858426
ENSG00000154556	SORBS2	Hepatic Endoderm	-0.274262522199393	0.00649374395412394	0.160337148894357	-1.33291309524974	-0.93263375104993	-1.18639285610092	1.05522414188148	0.96215018861715	0.965349066004711	-0.687698503050604	0.84991081813391	0.414435620164855
ENSG00000135046	ANXA1	Hepatic Endoderm	-0.859744128469333	-0.482589817271311	-0.525018500604402	-1.07165208235364	-1.07165208235364	-0.832730808828467	1.21151897126513	0.694046875839633	1.01480545598811	0.673701269797675	0.716872116059825	0.532442730930405
ENSG00000166963	MAP1A	Hepatic Endoderm	-0.875900764128525	-0.84721765596016	-0.280231393401134	-0.959560850467938	-1.16230151610652	-0.259465944046401	0.84689113257628	1.05668018228736	0.7042996588835	0.129629811121758	1.47936244700022	0.167814892241556
CTD-2396E7.9;CTD-2396E7.10	NA	Hepatic Endoderm	-0.416082863574826	-0.488332886718121	-0.426335539712135	-0.812722238012688	-0.812722238012688	-0.368882346809905	-0.812722238012688	1.02394652558069	1.78013212781403	1.23587184015106	0.0497921639197259	0.0480576933875527
ENSG00000163545	NUAK2	Hepatic Endoderm	-0.714770961566337	-0.95076076718573	-0.453204102931836	-1.2751501184803	-0.572569937568242	-0.218109116972913	1.58970618922547	1.30311967035346	0.571897353709235	0.0857833003295387	0.123423983030816	0.510634508056839
ENSG00000167642	SPINT2	Hepatic Endoderm	-1.00607014905656	-0.915213423754739	-0.938020402579842	-0.732537367112851	-0.340571801926766	-0.656764219266927	1.16409435639586	0.999213437548879	1.27695592458446	0.650403794544063	0.0282731321079348	0.47023671851649
ENSG00000244187	TMEM141	Hepatic Endoderm	-0.990687429248894	-0.990687429248894	-0.990687429248894	-0.156258728934895	-0.716709024312934	-0.751766155723725	0.302270931796651	1.26391772294474	1.25240136951104	0.575222302915348	0.407886672262219	0.795097197288242
ENSG00000170456	DENND5B	Hepatic Endoderm	-0.681257210136988	-0.855101412495827	-0.919128831304618	-0.740412941862923	-1.35710924774374	-0.120781360705242	1.09630883394681	0.541040365298641	1.01290638723643	0.65111654375113	0.888808961882801	0.48360991213353
ENSG00000115084	SLC35F5	Hepatic Endoderm	-0.793026282731159	-1.18615421471648	-1.59479046384565	-0.165310849144761	-0.198381121282363	-0.383214293915549	0.939707954064178	1.06580391184931	0.801208202238807	0.852961166871379	0.386922936861504	0.274273053750785
ENSG00000121691	CAT	Hepatic Endoderm	-0.890268240309445	-0.289552283229548	-0.280230178645287	-0.625457123619201	-1.10217619419375	-1.10217619419375	1.03008252924541	1.30011086947893	1.03840338573224	-0.266853134903623	0.504508132294635	0.683608432343389
RP11-1348G14.4	NA	Hepatic Endoderm	-0.743354267181257	-0.743354267181257	-0.537263995968229	-0.743354267181257	-0.743354267181257	-0.743354267181257	0.809383435821998	0.50253668359788	1.76968346795616	0.378579395592423	-0.24857801044983	1.04243035935588
ENSG00000147647	DPYS	Hepatic Endoderm	-0.662437809522809	-0.874345763407112	-0.668255492194084	-0.397626692832565	-0.600367358471151	-0.874345763407112	0.898454810629249	1.15641825090217	1.79413994257196	-0.0390227041169871	0.280954411855308	-0.0135658320068708
ENSG00000171004	HS6ST2	Hepatic Endoderm	-0.843941705484379	-0.962294351629708	-0.0440981178963344	-0.884724455959731	-1.04721916608174	-0.92811730698867	0.412339400679643	1.02691317212173	0.961681118425386	0.961006625413132	0.675743618123572	0.672711169277107
ENSG00000137563	GGH	Hepatic Endoderm	-0.383838082185069	-0.0875766227826693	-0.290426323073815	-1.58157643308689	-0.671895760173984	-1.35623402723608	0.666884645474851	0.823143852156284	0.995622443630242	0.630383444617639	0.643990583958321	0.611522278701178
ENSG00000116771	AGMAT	Hepatic Endoderm	-0.0726554268136943	-0.497509744878185	-0.0373199454501179	-0.992380347571856	-0.653793285297809	-0.900392279607711	0.938980220400459	1.23886963115735	1.50828980060502	0.472225343414556	-0.0382848494723946	-0.966029116485614
ENSG00000105640	RPL18A	Hepatic Endoderm	0.160834768698759	1.03346089208249	0.4699269140935	-0.957183797693673	0.603867327499004	-1.68380448131802	0.554689469017463	0.741631027500834	0.804926934202882	-0.252360974613527	-0.401154247692745	-1.07483383177697
ENSG00000099250	NRP1	Hepatic Endoderm	-1.2579137975571	-1.49390360317649	-0.566107403148191	-0.573093122465064	-0.399778814062182	-0.157766183157732	0.601488566418301	1.21753521592069	0.56607503780196	0.480741436829351	0.841250029487135	0.741472637109323
ENSG00000226614	SLC39A7	Hepatic Endoderm	-0.404369346925986	-1.32626918392619	-0.840329443607801	-0.822578364186474	-0.474837441605021	-0.190863310579623	1.34682408909116	1.45349521045449	0.441416518386252	0.45505933340571	-0.205289681331762	0.567741620825243
ENSG00000116833	NR5A2	Hepatic Endoderm	0.342719405980858	0.413867481151984	0.47053528458787	-0.491044437422083	-1.35302629372485	-0.76820536863779	1.65432736850778	0.437353628692942	0.575559113389162	-0.489696742472661	-1.19309207270449	0.400702632651277
RP11-407N17.3;CTAGE5	NA	Hepatic Endoderm	-0.609469964789955	-0.598469389677089	0.441034783132392	-1.77247966137516	-0.493299640024175	-0.929847039682789	0.729401229333411	0.979557116191444	1.04151336574615	0.45033644292289	0.408434422526784	0.353288335696099
ENSG00000115380	EFEMP1	Hepatic Endoderm	-0.171656768194388	-0.363499928246741	-0.0329929132672877	-1.28229014155208	-1.54025141208299	-0.483210410575602	1.11916319488618	1.11856391924918	0.888293915269173	0.205101940068324	0.686848822752618	-0.144070218306391
ENSG00000150961	SEC24D	Hepatic Endoderm	-0.797390457195251	-0.566028867886153	-0.508023022735373	-0.782385172950926	-0.896009947708845	-0.927972093807682	1.21913988398217	1.332684572714	0.354702799743724	0.755523683354249	-0.0547807221473295	0.870539344637407
ENSG00000171227	TMEM37	Hepatic Endoderm	-0.832176416038263	-0.719695018627998	-0.497450788173332	-1.04408436992257	-1.04408436992257	-0.600244478719782	0.508653333080689	0.721614588270703	1.34028362235045	0.701268982228745	0.905904472112435	0.560010443361475
ENSG00000122218	COPA	Hepatic Endoderm	-0.830493786471258	-0.777509439736743	-0.944828687014457	-0.386630462156381	-0.59952514364123	-0.821504524264661	0.82351107889318	1.75413828876479	0.84189780669861	0.382494408541375	0.148046857072083	0.410403603314697
ENSG00000148248	SURF4	Hepatic Endoderm	-0.54997843828688	-0.512054697030512	-0.476365094269438	-1.33162568439624	-0.0739192928543506	-1.36668011109936	1.12344234227427	1.01426962872118	0.974235424959701	0.485185077358631	0.370242516867171	0.343248327755821
ENSG00000138674	SEC31A	Hepatic Endoderm	-0.6139496849623	-0.642133513310829	-0.947666347285237	-0.937057962942032	-0.398498497244379	-1.09109701697253	1.06348965613653	1.23232256032086	0.944977725635885	0.665369903957005	0.414618964604659	0.30962421206236
ENSG00000174827	PDZK1	Hepatic Endoderm	-0.929884470467051	-0.929884470467051	-0.929884470467051	-0.263252309714749	-0.65590606553109	0.357516635532064	0.363073890578494	1.42483543480823	1.58315326467037	0.19204919230663	-0.435108213735624	0.223291582486825
RP11-385D13.1;TRIM16	NA	Hepatic Endoderm	-0.520939573488687	-0.917578947926549	-0.370945366177315	-0.917578947926549	-0.643600542990588	-0.67865767440138	0.635158755076706	1.11318506638274	1.75090675805252	-0.082255888636424	0.689105378561834	-0.0567990165263077
ENSG00000120899	PTK2B	Hepatic Endoderm	-0.495951452127781	-0.878977012060867	-0.656732781606201	-0.726647292780888	-1.20336636335543	-0.75952647215265	0.349371339647821	0.82739765095385	1.22517896399673	0.845227714808315	0.585157835058026	0.888867869619083
ENSG00000160789	LMNA	Hepatic Endoderm	-0.407460102533657	-1.5874495907707	-0.53440467100257	-1.11073052019616	-0.710451175996349	-0.101456389660845	0.832331930118657	0.76727031450458	0.883960396449299	0.591792138633982	0.507738153936288	0.868859516517477
ENSG00000182704	TSKU	Hepatic Endoderm	-1.08814796355547	-0.12330443360353	-0.144007389798425	0.165704023346018	0.422634513108708	-0.676816607716412	-1.30005591743977	1.27821387139399	1.69653800955809	0.0608775013700611	-0.144755742177355	-0.146879864485899
ENSG00000186188	FFAR4	Hepatic Endoderm	-0.678093545230788	-0.678093545230788	-0.678093545230788	-0.678093545230788	-0.678093545230788	-0.678093545230788	1.09470702880557	0.567797405548349	1.2936194273762	0.682839873579048	-0.678093545230788	1.10769108130635
ENSG00000170345	FOS	Hepatic Endoderm	-0.307023834225764	-0.1945424368155	0.42318607895935	-0.518931788110067	-0.518931788110067	-0.280010514584898	1.90084973277929	1.57113170254792	-0.518931788110067	-0.518931788110067	-0.518931788110067	-0.518931788110067
ENSG00000163541	SUCLG1	Hepatic Endoderm	-0.697582521857169	-0.975221731979596	-0.0216118909662582	-1.16724645539965	-0.85099260238174	-0.576075509207199	0.507441391153324	0.91370546322736	1.33707827377796	0.992491765869327	-0.0567854711088494	0.594799288872488
ENSG00000104267	CA2	Hepatic Endoderm	-0.919824804985381	-1.03817745113071	-0.936392554386182	-0.0626776789982131	-0.594653670650996	-0.84446232439848	0.65593133740573	0.462823774444954	1.56141421742354	0.277686663783129	0.720715597198075	0.71761689429453
ENSG00000131378	RFTN1	Hepatic Endoderm	-0.129523739642026	-0.496889316914873	-0.487567212330611	-0.832794157304526	-1.03553482294311	-1.0705919543539	1.81728341366084	0.594797235800514	0.3276683874671	0.0514201909307634	0.479010970534388	0.782721005095445
ENSG00000187244	BCAM	Hepatic Endoderm	-0.393752124242875	-1.03232886516253	-0.303673296688959	-0.879999145882547	-1.08273981152113	-0.912878325254309	0.926452837161671	1.17952720610893	0.783861363468891	0.548208163539071	0.431805981956367	0.735516016517424
ENSG00000010404	IDS	Hepatic Endoderm	-0.801456135569242	-1.1980955100071	-1.1980955100071	-0.213368749590914	-0.0250797474190585	-0.574856200283742	1.66676079769866	0.41424499824564	0.773617462599884	0.367814222157138	0.590428688406356	0.198085683769491
ENSG00000188643	S100A16	Hepatic Endoderm	-1.0931119116994	-1.0931119116994	-1.0931119116994	-0.258683211385397	-0.390531730787341	0.194289194299718	-0.117212778813112	0.519228596553349	1.6818693201296	0.652241440451915	0.305462189811717	0.692672714837741
RP11-192H23.4;SPAG5	NA	Hepatic Endoderm	-0.0142035413424209	-0.0800748690077029	0.0518378192573898	-0.43860827543898	-0.0342605212337039	-0.495528334360429	0.72196338759085	1.60190259518325	1.37553823082398	-0.681173700570561	-0.863711766954649	-1.14368102394702
ENSG00000135744	AGT	Hepatic Endoderm	-0.756309242193376	-0.756309242193376	-0.756309242193376	-0.756309242193376	-0.756309242193376	-0.517387968668207	0.796428460809879	1.33375424846461	1.21540373041361	0.365624420580304	0.850375084295007	-0.26265176492833
ENSG00000156113	KCNMA1	Hepatic Endoderm	0.385273596297723	-0.220624896567537	-0.0707216548043945	-1.22677018244574	-1.22677018244574	-1.22677018244574	0.0661881785998006	1.02783496974789	0.859687355896005	0.134163236364091	1.12118513096536	0.377324630838296
ENSG00000146376	ARHGAP18	Hepatic Endoderm	-0.872516363246175	-0.84383325507781	-0.490777653090718	-0.18769568815414	-1.15891711522417	-0.809656210436772	0.986886000729226	1.06006458316971	1.08014221497728	-0.0719621013502989	0.517093321874865	0.791172265829005
ENSG00000108039	XPNPEP1	Hepatic Endoderm	-0.241016640114323	-0.929326319504894	-0.362340056945869	-1.04166951401267	-0.345372821999173	-1.07454869338444	1.24740068369909	1.28916573511841	0.953021402632784	-0.157455165777383	0.0882957419011641	0.573845648387298
ENSG00000124762	CDKN1A	Hepatic Endoderm	-0.807591427975347	-0.0133540959814424	-0.633112683559097	-0.761538111328739	-0.745520976923689	-1.01949938185965	1.40028213902971	1.42883643179714	0.372004278294785	-0.184176322569525	0.379074719651463	0.584595431424391
ENSG00000182718	ANXA2	Hepatic Endoderm	-0.717201167045721	-0.817821627682373	-0.33930878490086	-0.430011074303797	-0.467383545907012	-0.707172005519503	2.24475103839657	0.09549037913937	0.19817134731023	-0.0896467315224543	0.568396176265989	0.461735995769563
ENSG00000198721	ECI2	Hepatic Endoderm	0.0902910179950309	-0.55435898289148	-0.169415771604037	-1.03688058098754	-1.51746989077344	-0.84479336440765	0.935948190917112	0.920774366668799	1.06044645619359	0.586650142296843	0.326347972007376	0.202460444585406
ENSG00000196586	MYO6	Hepatic Endoderm	-1.09054563686461	-1.11872946521313	-1.5735769618978	0.263732216134749	0.235395036114515	-0.355916174214138	0.511081650378826	0.744028927769225	0.935773314600576	0.766479320601444	0.121794535530754	0.560483237059581
RNASE4;ANG	NA	Hepatic Endoderm	-0.689594873651439	-0.577113476241174	-0.695412556322713	-0.643541557004831	-0.901502827535742	-0.901502827535742	0.0743963053505428	1.45321707773954	0.878924719644598	0.459430591274094	0.497071273975372	1.04562815030749
ENSG00000137171	KLC4	Hepatic Endoderm	-0.430476442536732	-0.946928579778429	-0.449371915524535	-1.01335666054209	-0.568737750160941	-0.648078621349634	0.860940792366163	1.57114279793866	1.11305006120002	0.294591801091246	0.335366395415387	-0.118141878119121
ENSG00000152558	TMEM123	Hepatic Endoderm	-1.63233759366025	-0.89051234343575	-1.0192290246841	0.450949264028101	0.753865228717578	0.373443558391397	0.507746334092499	1.00895118154363	0.955042944312251	-0.229480716420618	-0.256438493066303	-0.022000339818435
PLCXD2;PHLDB2	NA	Hepatic Endoderm	-1.03462263572665	-0.445560370644322	-1.03462263572665	-0.367990474974345	-0.530485185096357	-0.251845243912093	1.38515888516271	1.41371317793014	0.87610373516836	-0.199299576436522	-0.172108233794233	0.361558558049948
ENSG00000154265	ABCA5	Hepatic Endoderm	-0.338623169030651	-0.899002325944611	-0.899002325944611	-0.899002325944611	-0.625023921008651	-0.899002325944611	0.393956035100934	0.713338182308133	1.24157725398137	1.00592405405155	0.707682000543772	0.497178867831984
ENSG00000034677	RNF19A	Hepatic Endoderm	-1.09122944535983	-1.46513327249172	-1.23224952202558	0.552360413589585	-0.00558838359754432	0.405956882041354	0.605219069395119	0.822346943947496	0.686153357967878	-0.308842185422735	0.172904697261559	0.858101444694427
ENSG00000143622	RIT1	Hepatic Endoderm	-0.869242808524841	-1.12102203197878	-0.888138281512644	-0.145522259846284	-0.182894731449499	-0.224091095951246	0.94933030990806	1.19975334727317	1.22658775658629	-0.588150634287425	0.749379913560253	-0.105989483777064
ENSG00000102471	NDFIP2	Hepatic Endoderm	-0.533645461732142	-0.490466268068153	-0.34056302630501	-1.23865028341545	-0.794031373034305	-0.319797576950276	1.982631891707	0.340057209647016	0.746477244813575	0.24874179820495	0.110072772542023	0.289173072590776
ENSG00000168003	SLC3A2	Hepatic Endoderm	-0.353125233022401	0.23853216656004	-0.0385057157880118	-0.776333924929275	-0.942534028127636	-1.55419467990594	1.60445280584096	0.344462640440624	0.440076928633634	0.78797108440711	0.00296832599335151	0.246229629897545
ENSG00000107175	CREB3	Hepatic Endoderm	-0.547906097137496	-1.01265413064619	-0.482963486513107	-0.990849341296394	-0.524297428176292	-0.898861273332249	0.940511226675921	1.11710366646214	0.687759693527025	0.223316036553356	0.401822193225212	1.08701894065808
ENSG00000076770	MBNL3	Hepatic Endoderm	-0.669206474671769	-0.741456497815064	-1.06584584910963	-0.807884578578721	-0.188847434335277	-0.00880484760224709	1.21732520450913	-0.0452637896822754	1.31852214316339	0.679507503041679	0.884142992925369	-0.572188371844585
ENSG00000113615	SEC24A	Hepatic Endoderm	-0.871282004758393	-0.616731075783964	-0.742514131291256	-0.668643443217434	-0.351904921541578	-0.749774992108423	1.48710269066404	0.933269894939435	1.07742683025913	0.372500379293008	-0.375683856682064	0.506234630227496
ENSG00000138035	PNPT1	Hepatic Endoderm	-0.627663563788378	0.036110152874449	0.0658498923366126	-0.771914065571262	-0.0568858035929294	-0.508482531506822	0.463828012239366	1.48556720312275	1.63021106723714	-0.29972373801987	-0.966588183044967	-0.450308442286096
ENSG00000105173	CCNE1	Hepatic Endoderm	-0.202636620106377	-0.212186824224548	-0.458764636775798	-1.15892467318681	-1.0009687933241	-1.22182390720252	1.17894542889254	0.826724140061317	0.563264338890203	0.450126922287271	0.445065381892833	0.791179242795984
ENSG00000115255	REEP6	Hepatic Endoderm	-0.521043384718101	-0.408561987307837	-0.732951338602404	-0.732951338602404	-0.732951338602404	-0.732951338602404	0.819786364400851	1.03274761959086	0.904230276743769	1.17197504139376	0.665622762908709	-0.732951338602404
ENSG00000023697	DERA	Hepatic Endoderm	-1.46842692906672	-0.842020059090734	-1.05708286628012	-0.405833756982557	0.229310533990367	-0.568803079934195	0.555587890102776	0.567274063918554	1.00243212773265	0.553490882638529	0.754896991595522	0.67917420137593
ENSG00000149798	CDC42EP2	Hepatic Endoderm	-0.163807651413427	-0.87122256264108	-0.180375400814228	-0.87122256264108	-0.87122256264108	-0.632301289115912	1.26103616079808	0.569496955999535	0.688623442243605	-0.393930416932232	-0.00870816070866631	1.47363404786648
RP4-717I23.3	NA	Hepatic Endoderm	-0.768607934972475	-0.73992482680411	-0.638139930059582	0.328042163613196	-0.62640691097438	-0.152173114890351	0.443813482149926	1.70684107850531	1.33949861409264	-0.49366403259631	-0.466472689954021	0.0671941018901601
ENSG00000126524	SBDS	Hepatic Endoderm	-0.521887134070404	-0.464106365710617	-0.474098210269486	-1.0725300172791	-1.02467073213326	-0.667145205238072	1.42198666795806	0.297463127579988	0.879415275952102	0.953220322185393	0.169843457140309	0.502508813885087
ENSG00000102109	PCSK1N	Hepatic Endoderm	-0.886522077613508	-0.785325372857783	-0.534934348496765	-1.12764815638003	-0.239386426145545	-0.674675750694913	0.803712411592286	0.530883246635818	1.44102267228217	0.217164872710658	0.385878456717081	0.869830472250533
ENSG00000125772	GPCPD1	Hepatic Endoderm	-0.371217188259903	-0.622996411713843	-0.269940809726751	-1.21205867679617	-0.509478495884112	-0.973137403270999	0.0808996842493777	1.14266122847912	1.4564270291829	0.148874742013668	0.737930165238833	0.392036136487873
ENSG00000149573	MPZL2	Hepatic Endoderm	-0.460467915303253	-0.672375869187555	-0.672375869187555	-0.672375869187555	-0.672375869187555	-0.433454595662387	0.880361833815699	1.52944005179819	1.17467160300198	-0.672375869187555	0.482924306074865	0.188404062212685
ENSG00000180573	HIST1H2AC	Hepatic Endoderm	0.0954229842130712	1.05209351348382	0.0652065076111832	-0.674003876442899	-1.38475223192313	-1.21489074565631	1.00068397011008	1.00008469447307	-0.359387619773416	0.246195743137074	-0.260156535347976	0.433503596115428
ENSG00000166478	ZNF143	Hepatic Endoderm	0.0557235769673574	-0.452372713524456	0.858036292025926	-0.508290440849589	0.0935662331877825	-1.00588488763734	1.49767244417922	0.863835905969145	0.563620261468147	-0.0632144651964581	-1.13434794062927	-0.76834426596046
ENSG00000116044	NFE2L2	Hepatic Endoderm	-0.65535256215163	-0.864925400710725	-0.951529744906883	-0.461888267661968	-0.108234680236991	-0.300237539120698	2.15369427107651	0.429408890329452	0.24834155749303	0.183880431889255	0.240010719338186	0.0868323246624643
RP11-47I22.4;FLJ22447	NA	Hepatic Endoderm	-0.642900339602508	-0.642900339602508	-0.642900339602508	-0.642900339602508	-0.642900339602508	-0.642900339602508	1.12990023443385	1.04815618489509	1.49767924032348	0.479033323171172	-0.148124082871081	-0.149242862337462
ENSG00000182871	COL18A1	Hepatic Endoderm	-0.856672961098478	-1.73403957422576	-0.609823535254383	-0.332198796496714	0.0371511364303103	0.0175890352776307	0.386611781435951	1.12227060211258	0.313941038509698	-0.131927376403389	0.800419932567734	0.986678717144818
ENSG00000164294	GPX8	Hepatic Endoderm	-1.27362502611294	-0.240853771042218	-0.677955655385546	-0.713170426515784	-0.957005768252542	-0.443892610569673	0.931785085259418	0.937778171414538	0.834481522952176	0.864168894983177	0.115984659008104	0.622304924261285
ENSG00000110047	EHD1	Hepatic Endoderm	-0.412535868748172	-0.440753446320236	-0.562530195457583	-0.268650596868245	-0.55079717637238	-0.630138047561073	1.51241191100188	1.10134254799085	0.657349013610571	0.312532374879807	0.535146841129024	-1.25337735728444
ENSG00000111907	TPD52L1	Hepatic Endoderm	-0.758199308741484	-0.141826981819199	-0.376460598586027	-1.06061719512453	-0.441580050881089	-1.07965719213027	0.234159237347811	0.936026686538187	1.58717273371307	0.247331266508799	0.0799956358556697	0.773655767319074
ENSG00000143995	MEIS1	Hepatic Endoderm	-0.571048336475565	-0.571048336475565	-0.571048336475565	-0.571048336475565	-0.571048336475565	0.0521909732477974	-0.00210826272291831	0.322143830996739	1.13953338523325	-0.571048336475565	1.99192095130904	-0.0773908592105186
ZNF586;CTD-2583A14.10;ZNF587B	NA	Hepatic Endoderm	-0.292818628254556	-0.675844188187642	-0.613846841181656	0.120600217028902	-0.496096088851919	-0.0738167712040654	0.292724821563336	1.57803624935155	1.51280419565521	-1.00023353948221	0.155066635780211	-0.506576062217163
ENSG00000109458	GAB1	Hepatic Endoderm	-0.971859765353754	-0.4429076306577	-0.99580072594945	-0.494819998091169	-0.733335113181923	-0.761737681133577	1.1264031341022	0.943074802819023	0.984488968089069	0.630962714337143	0.307614957030558	0.407916337989582
ENSG00000233056	ERVH48-1	Hepatic Endoderm	-1.07862671638372	-0.66264217985738	-1.08887939252103	0.763510440015043	-0.0567519504127021	0.340940058588842	1.18414851614759	0.927020972851096	0.95327923653058	-0.639943031531455	-0.319965915559159	-0.322090037867704
ENSG00000106078	COBL	Hepatic Endoderm	-0.143138003038821	-0.329231863393868	0.0828103733211414	-1.16063101275609	-1.44277759226022	-0.484831001858949	0.274423747717084	0.920320905870924	1.32268101678286	-0.240431393176113	0.689865609784442	0.510939213007604
ENSG00000014123	UFL1	Hepatic Endoderm	-1.06882291853822	-0.880393754476908	-0.385518179194228	-0.383279774871533	0.454943654546982	-0.378846151466594	0.956676538512998	1.59812272038141	0.877998785435078	-0.203621641860976	-0.623104627443997	0.0358453489759869
ENSG00000152700	SAR1B	Hepatic Endoderm	-0.532782404494159	-0.941851762642936	-0.260309764792892	-1.06924223384182	-0.561234397452128	-0.718796025217193	1.12062437413777	1.0874726059284	1.0547534538183	0.672061928273318	0.12454080933058	0.0247634169527684
ENSG00000119801	YPEL5	Hepatic Endoderm	-0.721342301803292	-1.09524612893519	-0.993461232190657	-0.699581633601319	0.289459383157976	-0.396907288018395	0.735473126871851	1.25807331405502	1.05604050152441	0.725329907202182	-0.0776240675291269	-0.0802135807334694
LOXL2;ENTPD4	NA	Hepatic Endoderm	-0.472834114302273	-1.03321327121623	-0.827123000003205	-0.366581110463931	-1.03321327121623	-0.589373380013449	1.09904545222293	1.05685021944175	0.358290388938201	0.871713108779931	0.57347105527215	0.362967922560362
ENSG00000009765	IYD	Hepatic Endoderm	-0.72666250209656	-0.72666250209656	-0.72666250209656	-0.72666250209656	-0.72666250209656	-0.72666250209656	0.249236630789725	0.964394022401036	1.41391707782942	0.634270916713276	0.428637673165861	0.669518691680036
ENSG00000165795	NDRG2	Hepatic Endoderm	-0.795482061295637	-0.867732084438932	-0.645487853984266	-0.3576927354195	-0.489541254821444	-0.95320016220833	1.35244633098181	0.838642578575785	0.89433610260825	0.85647264243025	-0.0368212604710787	0.204059758043096
ENSG00000121310	ECHDC2	Hepatic Endoderm	-0.706715298600729	-1.10335467303859	-0.897264401825562	-0.1186279126224	-0.0707686274765527	-0.480115363315228	0.860341344353085	0.927409341270693	1.18838072562534	0.0185789897350896	0.991833071668401	-0.609697195773544
ENSG00000065485	PDIA5	Hepatic Endoderm	-1.01722939149832	-0.571463262534077	-0.524563628644151	-0.592881787996093	-1.07347109778199	-0.5205675469049	0.96695921830302	1.08120678291988	0.452617180806195	0.167744803739026	0.64949168642332	0.982157043168098
PALM2-AKAP2;AKAP2	NA	Hepatic Endoderm	-0.274071032604168	-0.493474058170179	-0.34260426151554	-1.0338086577838	-1.09903227221881	-1.06290194938919	0.935854739494541	0.748434120628905	0.945992214929474	0.653543331662086	0.582790347399907	0.439277477566766
ENSG00000169895	SYAP1	Hepatic Endoderm	-0.485674980563359	-1.02064639218456	-0.357533425847231	-0.830865495197183	-0.514126973521328	-0.747429413028021	0.0566730160184905	0.744973888136498	1.67275164614045	0.719169352204118	0.262160909560022	0.500547868282103
ENSG00000198799	LRIG2	Hepatic Endoderm	-0.173326031113357	0.637552383044228	-0.488875755233821	-0.29672084299596	-0.123406534593077	0.198544662666837	-1.54192067500195	0.86036638867072	1.26688098529736	0.0239890571622876	0.685179559833649	-1.04826319773691
ENSG00000134910	STT3A	Hepatic Endoderm	-0.0927200358880569	-0.612345186017605	-0.014815542468904	-1.20933856794899	-1.07085166700199	-0.565395440978916	0.952617415480209	1.01333516406337	1.3409036491561	0.211323524220893	-0.0614660850571767	0.108752772441068
ENSG00000060762	MPC1	Hepatic Endoderm	-0.177807770856747	-0.694259908098444	-0.327802097566158	-1.01864925939301	-1.01864925939301	-1.01864925939301	0.274309101652534	0.885661204286575	1.01157646982547	0.547260472771232	0.769874939020449	0.767135367144125
CCDC186;MIR2110	NA	Hepatic Endoderm	0.570260749980991	-0.163804928578624	0.274083567225738	-0.813322360276178	0.257777757122434	-1.24659630076779	1.6885585304324	0.634541250659699	0.165781968186491	-0.12441899088218	-0.223024227010929	-1.01983701609205
ENSG00000040731	CDH10	Hepatic Endoderm	-0.734905029954185	-0.734905029954185	-0.734905029954185	-0.734905029954185	-0.734905029954185	-0.734905029954185	0.240994102932099	1.03079392823908	1.04552251722615	1.01044832219713	0.420395145308235	0.66127616382241
ENSG00000116678	LEPR	Hepatic Endoderm	-0.728664303528958	-0.127948346449061	-0.734481986200232	-0.463853186838714	-0.94057225741326	-0.317332947689898	1.3425987962055	1.41414764786202	0.260318621323746	-0.105249198123136	0.8479519410002	-0.446914780148214
ENSG00000132854	KANK4	Hepatic Endoderm	-0.77858599210169	-0.77858599210169	-0.572495720888662	-0.77858599210169	-0.50460758716573	-0.539664718576522	0.514372368943855	1.25217802220759	1.30787154624006	0.787323740062552	-0.283809735370264	0.374590060852185
ENSG00000184305	CCSER1	Hepatic Endoderm	-0.706482002913465	-0.0845976111334488	-0.257848386499768	-0.747264753388816	-0.909759463510828	-0.970057022938335	0.718361809298041	1.52848479393141	1.0991408209963	-0.0529634953312823	0.192787412347265	0.190197899142922
ENSG00000111452	ADGRD1	Hepatic Endoderm	-0.694743175326898	-0.694743175326898	-0.694743175326898	-0.436781904795987	-0.694743175326898	-0.694743175326898	0.598215185718647	1.61078760285163	1.01583854638192	0.427190487446782	-0.199966918595472	0.458432877626977
AKR1C1;AKR1C3	NA	Hepatic Endoderm	-0.563947766806153	-0.465294052182499	-0.776493883053402	-0.81170865418364	-0.405352845083146	-0.755728433698668	1.02501312162609	1.04166540357703	0.807806484847172	1.14648355884646	-0.533968309183638	0.291525375294388
ENSG00000164125	FAM198B	Hepatic Endoderm	-0.634157850491254	-0.634157850491254	-0.634157850491254	-0.634157850491254	-0.634157850491254	-0.0109185407678916	0.658800510554291	0.119296814753896	1.14626969668909	1.66487654080916	-0.634157850491254	0.226622080908987
RP11-29G8.3;LMO7	NA	Hepatic Endoderm	-0.609209572208055	-0.75400499243927	-0.0411599281104413	-0.656691313736702	-0.920272737517422	-1.16421234944414	0.736302181369322	1.08846465038253	0.94147985095122	0.561558616976421	0.126701962459586	0.691043631316949
ENSG00000135002	RFK	Hepatic Endoderm	-0.339568144708062	-0.591347368162001	-0.794022934943773	-0.922448362713415	-0.906431228308366	-0.557170323520964	0.951849090194834	0.26030988539629	1.15838540398809	0.99883209616036	-0.0251094579819058	0.766721344598906
ENSG00000197043	ANXA6	Hepatic Endoderm	-0.499650061517377	-1.55160585698369	-1.0504926440462	0.0488048083017318	-0.126960316693536	0.121064082457599	-0.0131833761465945	1.14290331006639	1.1621330180113	-0.148112841642207	0.277472240094819	0.637627638097769
ENSG00000116005	PCYOX1	Hepatic Endoderm	-0.97257262749552	-0.605556897663208	-1.00743019545087	-0.631516298437879	-0.550211046168332	-0.502241757603731	0.583576952967976	0.474449507038892	1.26518898640773	0.994123012968601	0.641382453600804	0.310807909835538
ENSG00000151093	OXSM	Hepatic Endoderm	-0.651468187674341	-0.863376141558644	-0.657285870345615	-0.196743980806342	-0.359238690928353	-0.240136831835281	0.429582219486901	1.22668734909934	1.47541889567378	0.702533590605599	-0.863376141558644	-0.00259621015840272
ENSG00000101335	MYL9	Hepatic Endoderm	-0.218787307696415	-0.322284769335538	-0.627817603309946	-0.678329894186322	-0.961153051801684	-1.11552041213457	0.492421324786084	0.209692929239837	1.34342445286698	0.90403337722868	0.0596566182393454	0.914664336103549
ENSG00000206052	DOK6	Hepatic Endoderm	-0.41565384661593	-0.97603300352989	-0.285185841703037	-0.97603300352989	-0.702054598593929	-0.737111730004721	0.796767570506471	0.636307504722855	0.871014468659642	-0.140709944239765	0.81249119488357	1.11620122944463
ECH1;AC104534.3	NA	Hepatic Endoderm	-1.35086880309116	-1.19738565465973	-0.40327843423337	-0.600710878228519	0.387807727987351	-0.109211833681938	1.0653413055871	1.17064856734203	0.61037940837449	0.242916631058117	0.0112491369019896	0.173112826643637
ENSG00000128016	ZFP36	Hepatic Endoderm	-0.605482878230786	-0.493001480820521	-0.61130056090206	-0.559429561584178	-0.817390832115088	-0.57846955858992	1.60239068877427	1.01927793147829	0.574112828039346	0.748518900049154	-0.322614575383662	0.0433890992851524
ENSG00000162298	SYVN1	Hepatic Endoderm	-0.775579413139726	-0.993178828955532	-0.548145196504667	-0.803397931968154	-0.411820033491283	-0.644221038057363	1.35234820191332	0.718835771009288	0.314554044361211	0.972960520532725	0.289628472789051	0.528015431511133
ENSG00000005893	LAMP2	Hepatic Endoderm	-1.02674214264645	-0.595172464186243	-0.796855588303645	-0.944423378349592	-0.492786544133415	-0.415945922470107	0.240453679595961	1.07856587245324	0.692479839878526	0.634393894102599	1.01784985890999	0.608182895149129
ENSG00000006652	IFRD1	Hepatic Endoderm	-0.439216044372557	-0.545971479552974	0.102928985260322	-1.1644134087801	-0.513362494952558	-1.15205654625695	1.40798794983561	0.936313496392033	0.159084756160124	0.409778988955659	0.313035058980447	0.485890738330945
ENSG00000136044	APPL2	Hepatic Endoderm	-0.808514887303218	-1.06029411075716	-0.493307848198132	-0.664629615423292	-0.476340613251436	-0.722939607561338	0.633814677779282	0.552459545146266	0.943497989987232	0.255570004156681	0.577743858996122	1.26294060642899
ENSG00000116171	SCP2	Hepatic Endoderm	-0.629589791310762	-0.931064724632819	-0.130786239720561	-1.20203236080859	-0.0457818064328119	-0.88318763060341	0.734355124190617	0.728713100179393	1.33977613283768	0.456910121809366	0.10514504057941	0.45754303391249
ENSG00000026508	CD44	Hepatic Endoderm	-0.109336730366515	-0.227689376511843	-0.125904479767315	-0.558790371063257	-0.312614190963878	-0.816751641594168	1.94903762669215	0.623967877046447	-0.411081661263281	0.0185714176959566	-0.816751641594168	0.787343171689872
ENSG00000138835	RGS3	Hepatic Endoderm	-0.144790929027323	0.359491337270712	-0.28581100569308	-0.441124860489239	-1.10775702124154	-0.868835747716372	0.185201339804004	1.24696288403374	1.44574093747812	-0.272433961951416	-0.612980764510114	0.4963377920425
RP5-972B16.2;SYTL5	NA	Hepatic Endoderm	-0.645936754675509	-0.321547403380942	-0.645936754675509	-0.645936754675509	-0.645936754675509	-0.645936754675509	1.12686381936085	0.700654808845097	1.38428897454297	0.475996908098171	0.509363420586911	-0.645936754675509
ENSG00000164022	AIMP1	Hepatic Endoderm	-0.11817179741825	0.215805985765573	0.130813984964796	-1.0439309235211	-0.165035298581595	-1.6456890725295	0.540684016980997	0.755256564786319	1.33710483006375	-0.14256080959693	0.368866679245169	-0.233144160159227
ENSG00000100528	CNIH1	Hepatic Endoderm	-0.186346975403616	-0.0120949484618667	-0.0932297800961974	-1.18569556996704	-0.391041842837182	-1.44362759332068	0.726005754334846	1.19634406170845	0.957896485026029	0.395038648135785	-0.0943974114738184	0.131149172355284
ENSG00000206527	HACD2	Hepatic Endoderm	-0.380552659839602	-1.34351875205382	-0.796885170304586	-0.358791991637629	-0.466520337279465	0.142474449056039	1.07626276883554	0.00307281146678662	0.9952762851786	1.26473873164676	-0.1882185767914	0.0526624417227755
ENSG00000100284	TOM1	Hepatic Endoderm	-1.08954645932801	-0.673561922801668	-0.234000282443	-0.651757133451869	-0.783605652853812	-0.198784727766753	-0.510286700879583	1.24891498014093	0.852609203466552	0.693055895638818	0.740914401069737	0.60604839920865
ENSG00000164111	ANXA5	Hepatic Endoderm	-0.885234512029593	-0.571702274175811	-0.465852630188211	-0.04824856834502	-0.855553165675133	-0.941152778201383	1.03225065662771	0.772928542964318	1.07393622204953	0.550726674128574	-0.369856732229261	0.707758565074285
ENSG00000172159	FRMD3	Hepatic Endoderm	-0.135247510653109	0.11699724339713	-0.309239969266516	-0.695626667567069	-0.695626667567069	-0.695626667567069	2.07016260071924	-0.467323634442067	0.161765097027528	-0.218334521858221	0.702947433944044	0.165153263833172
ENSG00000138764	CCNG2	Hepatic Endoderm	-1.10567113644088	-1.31757909032518	-0.495633074776717	0.0421116184445722	-0.144563327737133	-0.260538088817794	1.44821017796114	0.44811986786809	0.393002631383635	0.248330641839064	-0.162278915062759	0.906488695663961
ENSG00000281758	KCNIP4	Hepatic Endoderm	-0.540056088069291	-0.287811334019051	-0.714048546682698	-0.84247397445234	-0.82645684004729	-0.656595353780467	-0.124536112096966	1.1013806760025	1.04014433494273	0.948158833180498	0.84955359705175	0.0527408079706251
ENSG00000112977	DAP	Hepatic Endoderm	-1.02458490580396	-0.770840381876808	-1.15802181781506	-0.35621446042098	-0.471890655874595	-0.143429094780481	0.444428081830827	0.597322548077981	1.06259351701827	0.598033393125595	1.09867567541456	0.123928101104662
ENSG00000134013	LOXL2	Hepatic Endoderm	-0.659851937685449	-0.243867401159111	-0.509857730374077	-0.389859151371009	-0.78251290718735	-0.817570038598142	1.07576741131585	0.847819151556276	0.0387335852430724	-0.579199166414463	0.73203288629015	1.28836529838425
ENSG00000174021	GNG5	Hepatic Endoderm	-0.825178762647151	-1.34163089988885	-0.0828616837576059	0.447810517228103	0.521538107203533	-0.489206274187331	0.878547515531889	0.238290212496171	0.762525076168744	0.382573826980334	-1.17124399445199	0.67883635932415
ENSG00000111057	KRT18	Hepatic Endoderm	-0.798136559385019	-1.07831562876841	-0.543759384458267	-0.499663032198899	-0.718217642210908	-0.349562183027335	1.45127921537575	0.254988220342887	0.651282112282865	0.483434965453909	0.335544860861677	0.81112505573175
ENSG00000186951	PPARA	Hepatic Endoderm	-0.886772046130206	-0.509617734932184	-0.89258972880148	-0.113953239598318	-0.594542549384218	-1.09868000001451	1.03357872342465	0.513660508238236	0.748367472175024	0.262253418795328	0.689844198398952	0.848450977828724
ENSG00000183463	URAD	Hepatic Endoderm	-0.62791869218436	-0.62791869218436	-0.62791869218436	-0.62791869218436	-0.62791869218436	-0.62791869218436	0.924819010818895	0.901161792147388	0.931927312700326	1.2770076878118	-0.133142435452934	-0.134261214919314
ENSG00000116337	AMPD2	Hepatic Endoderm	-0.340257286926639	-0.707622864199486	-0.467201855395552	-0.535520014747495	-1.01610932453339	-0.737469383349131	1.43730875715716	0.384063688515901	0.390479595731321	0.889391526056007	-0.121672673652572	0.824609835343879
ENSG00000170949	ZNF160	Hepatic Endoderm	-1.40108606823622	-0.267201213154734	-0.780893593024631	-0.0666394684088134	-0.0497576281291447	-0.219324119125325	0.0557293604389208	1.25842262010557	1.37349943449316	0.418759807477504	0.0954120501709186	-0.416921182607207
LINC00969;MUC20	NA	Hepatic Endoderm	-0.700279524131669	-0.700279524131669	-0.700279524131669	-0.700279524131669	-0.700279524131669	-0.700279524131669	0.275619608754615	1.0654194340616	1.08014802304867	0.421654138642011	0.455020651130751	0.903815289152371
ENSG00000169908	TM4SF1	Hepatic Endoderm	-0.591841085021453	-0.591841085021453	-0.385750813808425	-0.591841085021453	-0.591841085021453	-0.591841085021453	1.18095948901491	0.654049865757684	1.04534053032472	1.15351226712986	-0.0970648282900264	-0.591841085021453
ENSG00000132405	TBC1D14	Hepatic Endoderm	-0.224550377792254	-0.569707393747339	0.773485229888297	-0.118666535521483	0.61585951706643	-0.321208236435326	-1.2859571731691	1.45943806369462	0.824183994761554	-0.169277232994951	-0.351815299379039	-0.631784556371411
ENSG00000137801	THBS1	Hepatic Endoderm	0.341896791307517	-0.134941281001256	0.0530746871042487	-0.356989807507514	-0.899609458601454	-0.675772871235365	2.16008115660563	0.16350931867976	0.0349919758326638	-0.241256220703673	-0.446889464251089	0.00190517377053157
ENSG00000154545	MAGED4	Hepatic Endoderm	-0.508401872382369	-1.78577381685527	-0.358631308658003	-0.128744561355634	-0.0630833863067819	-0.299780615745406	0.634007704034095	1.05668691215639	0.954575078686658	0.119152563140899	-0.179089490366882	0.5590827936523
ENSG00000213585	VDAC1	Hepatic Endoderm	-0.506128878066356	0.31986049439391	1.26694628815892	-0.806917554868606	0.631570131035884	-1.13016614166973	-0.257348086155011	0.91106123766313	0.851025509362443	-0.432091650547913	-0.379680235519139	-0.468131113787528
ENSG00000179104	TMTC2	Hepatic Endoderm	-0.568426088241626	-0.269695713591072	-0.453894983920818	0.381188256030351	0.0251396139648215	-0.218799997961895	1.00733005414948	-0.677124551939261	0.916903459359569	-0.153907336695599	1.28712828831533	-1.27584099946928
ENSG00000150893	FREM2	Hepatic Endoderm	-0.853634887545407	-0.213021390966701	-0.639070964008197	-0.318794870813575	-1.04921376884596	-0.646331824825364	0.0609415221847582	0.957033427043067	1.18086999754219	0.187408769785686	1.09973441459533	0.234079575854175
ACAD11;NPHP3-ACAD11	NA	Hepatic Endoderm	-0.318448845591829	-0.605354108151736	-0.916553939022639	-0.328677242200491	-0.444353437654107	-0.58660926555413	-0.519864763660734	1.33360057649511	1.35246987471751	0.337035834555703	0.0225852780430023	0.674170038024339
ENSG00000100330	MTMR3	Hepatic Endoderm	-0.761456619203386	-1.31742735212779	-0.546892695666175	-0.565489225877164	0.0575070952949632	-0.739939690634762	0.41451650362332	1.07626349702045	0.462803102734729	0.808456718129958	0.329412947529374	0.782245719176488
ENSG00000075711	DLG1	Hepatic Endoderm	-0.645063607607672	-1.01977690417457	-0.649048110459911	0.0609414165703166	-0.644694764565579	-0.915413955605337	0.177163972748891	0.660793415306457	1.38276771573644	0.419173636635805	0.51517963555057	0.657977549864591
ENSG00000196083	IL1RAP	Hepatic Endoderm	-1.00546992808353	-0.813047037439063	-0.459991435451971	-0.417382542105197	-0.897971851891097	-0.475692534243243	1.14245846419392	0.363589655671881	0.982258689751632	0.343244049629923	0.547879539513613	0.69012493045313
ENSG00000171759	PAH	Hepatic Endoderm	-0.643242127579454	-0.643242127579454	-0.256855429278901	-0.385280857048543	-0.369263722643494	-0.643242127579454	1.12955844645691	0.96909838067329	1.4432154107623	0.192080931710671	-0.643242127579454	-0.149584650314408
ENSG00000164096	C4orf3	Hepatic Endoderm	-1.17722860802551	-1.07201960828897	-1.06269750370471	0.0923855558944986	0.0101891787485133	-0.144178181584374	0.0790524981385095	0.517643544419509	1.02110768011534	1.05386446196878	0.342456715582438	0.339424266735973
ENSG00000140577	CRTC3	Hepatic Endoderm	-0.397656278158802	-0.958035435072762	-0.571648736772209	-0.958035435072762	-0.453897984442472	-0.175258043258208	0.594702267930493	1.07272857923652	0.752546286636051	-0.480743289363914	1.13715230963423	0.438145758703833
ENSG00000168679	SLC16A4	Hepatic Endoderm	-0.691651687716639	-0.691651687716639	-0.691651687716639	-0.691651687716639	-0.691651687716639	-0.45273041419147	0.861086015286616	0.445978728634294	1.21907468317837	0.669281731093197	-0.196875430985212	0.912443125567401
PRR13;RP11-793H13.8	NA	Hepatic Endoderm	-0.0903767753936111	0.233983590745635	0.250213829345644	-1.29850547914712	-0.356710409312792	-0.992447157907115	0.644556971167691	0.627062513951006	1.55987429876921	-0.0298711975703587	-0.376650448210556	-0.171129736437629
ENSG00000122547	EEPD1	Hepatic Endoderm	-0.916713274323678	-1.0446737953663	-1.13686256067443	-0.452813641537452	-0.174281923329197	-0.223145787056643	0.554508222186863	0.839854747783588	0.876751889798896	0.768174454769142	0.57462259193424	0.334579075814964
ENSG00000109680	TBC1D19	Hepatic Endoderm	-1.04721407832187	-0.934732680911603	-0.872735333905617	-0.424693331892172	-0.556541851294115	-0.202081030698786	0.873136691232989	0.771641982103114	1.03261336645776	0.48623131994514	0.52940216620729	0.34497278107787
ENSG00000116285	ERRFI1	Hepatic Endoderm	-0.811068731916739	0.122584629470046	-0.162686366526986	-0.641423678991264	-0.585642897563158	-1.1038461191827	1.39162887669574	0.561712302659533	0.853725384544665	0.292618218407428	0.5728406996241	-0.490442317220663
ENSG00000058262	SEC61A1	Hepatic Endoderm	-0.494167436496801	0.246714828511165	-0.64216872210942	-1.08689775491869	-0.958711688095955	-0.659472069391218	1.2134911789311	0.845109138025179	0.321244760716286	0.120063996052759	0.300575130516315	0.794218638259272
ENSG00000126016	AMOT	Hepatic Endoderm	-1.09161576779836	-1.30352372168266	-0.756890139933429	-0.318796961266472	-0.426525306908308	0.512682427727759	0.249213981320592	0.665398545322325	0.939565077077273	0.745070356481087	0.303160604805721	0.482260904854474
ENSG00000164244	PRRC1	Hepatic Endoderm	-0.544589542697599	-0.557537534243747	-0.190620475698296	-0.788234959196012	-0.249675493498359	-0.769304192253317	1.35293974316295	1.4042601718988	0.523301940198552	0.0520144795085802	0.2346917612707	-0.467245898452252
ENSG00000079332	SAR1A	Hepatic Endoderm	-0.368901223441182	-0.435044226590458	-0.0542817062067931	-1.48883912143373	-0.126045927566807	-0.73372674844156	1.09345577298182	0.815178715416101	0.676913779906233	0.571778037336089	-0.486325392975171	0.535838041015456
ENSG00000157214	STEAP2	Hepatic Endoderm	0.0299964189549562	-0.0706240416816954	0.0949390295793453	-0.580743364765638	-0.544795344605885	-1.00845425199277	0.0455828355276049	1.05815525266059	1.68929652812946	-0.770083379809092	-0.09207535025552	0.148805668258655
ENSG00000186314	PRELID2	Hepatic Endoderm	-0.72735425887483	-0.68417506521084	-0.534271823447698	0.548456179747575	-0.0620713220791651	0.197847813560189	-0.137582648085793	1.66844661574809	0.863177607630618	-0.854997291798923	0.259668490945953	-0.537144298135172
ENSG00000162928	PEX13	Hepatic Endoderm	-0.360173291338959	-1.10818162653291	0.291561434864424	-0.210892251790689	-0.302999369425192	-0.226158747761883	0.750529395294643	1.56717620106444	0.88226701458675	-0.753393493601283	-0.507642585922736	-0.0220926794366019
ENSG00000114784	EIF1B	Hepatic Endoderm	0.136205010026356	0.466756963877764	0.421571588217315	-0.0780699139509231	0.0063886518137366	-1.10364892266121	1.76454655656339	0.240962329590412	0.123314145868298	-0.405574431539393	-0.728922188845979	-0.843529788959772
ENSG00000176018	LYSMD3	Hepatic Endoderm	-0.345802179792305	-0.413188169019385	0.134154233864615	-0.664752041582972	-1.05629831620975	-0.488848741129	1.58346131058331	0.977000681314637	0.644839006812671	-0.483960726646482	0.118641234613317	-0.00524629280865341
ENSG00000138640	FAM13A	Hepatic Endoderm	-0.144919779294614	-0.547876515760277	0.0629449654068441	-1.01161830668738	-0.628569109683495	-0.680920432084736	-0.704080435690123	1.07763278212788	0.905915063209365	-0.0775764092886915	0.876242573814557	0.872825603930673
ENSG00000182054	IDH2	Hepatic Endoderm	-0.72590174828342	-0.937809702167722	-0.391176120418489	-0.679848431636811	0.0947763433943156	-0.698888428642554	0.038089430718562	1.51052611148907	0.842617845012617	0.807543649983588	-0.0752953002353083	0.215366350786153
ENSG00000212710	CTAGE1	Hepatic Endoderm	-0.664352855638084	-0.900342661257477	-0.678098430802811	-0.748012941977498	-0.720594561921754	-0.44195462073749	1.05843904106672	0.466324511945551	0.861725525789705	0.823862065611705	0.381952313936339	0.561052613985092
ENSG00000136068	FLNB	Hepatic Endoderm	-0.702525517532957	-1.55455652640453	-1.02797387675934	0.108203110537149	-0.14482644174727	-0.120692640104608	0.814941582534657	0.759574962690464	0.676269347735086	0.346263466079097	0.48599679380527	0.359325739166992
ENSG00000155657	TTN	Hepatic Endoderm	-0.704832950487566	-0.528646191648226	-0.704493583183525	-0.515763558856186	-0.841638570723171	-0.46050935428662	0.957487780889014	1.19337465754924	1.15168002933786	0.158027757960654	0.159409575431937	0.135904408016584
ENSG00000100852	ARHGAP5	Hepatic Endoderm	-1.23947320807146	-1.0741646210608	-0.0748481725979255	-0.634257119795983	-0.0356045361248816	-0.54299196004405	0.946506257984786	0.981261858318907	0.583826476663216	0.605611161310404	0.0185118509890563	0.465622012428733
ENSG00000135346	CGA	Hepatic Endoderm	-0.470485380301373	-0.470485380301373	-0.470485380301373	-0.470485380301373	-0.470485380301373	-0.470485380301373	-0.470485380301373	0.775405570477764	1.67009419962461	-0.470485380301373	0.92808872120974	0.390294551098868
ENSG00000125149	C16orf70	Hepatic Endoderm	0.525571720515288	0.54966556912033	0.0929094975100972	-1.15927605381277	-1.15927605381277	0.230835518644453	-0.590335980060124	1.14625472436576	0.812436918794218	-0.681983908103923	0.239298047698343	-0.00610000085889473
ENSG00000180667	YOD1	Hepatic Endoderm	-0.38358155735553	0.258878695981504	-0.254813683888393	0.139056823833463	-0.419458110905325	-0.911555483036058	1.28882439022571	1.10440945675833	0.866892457253305	-0.272062519149959	-0.439398149803089	-0.977192319913961
ENSG00000100994	PYGB	Hepatic Endoderm	-0.134129765580013	-0.49274792536866	-0.978652247378052	-0.42429957719891	-0.79250099443055	-0.492685432208821	0.8750683575104	1.17296131980675	1.0353652993626	0.629534982095506	-0.514199233942485	0.116285217332232
ENSG00000170581	STAT2	Hepatic Endoderm	-0.0958598347282447	-0.560607868236942	-0.217183251559791	-0.538803078887142	-1.37323177920114	-0.590454387386587	-0.397332646314857	1.11972832412871	0.713225759140608	0.806009950203545	0.72195596550585	0.412552847335995
ENSG00000275333	FAM120B	Hepatic Endoderm	-0.0579110484182932	-0.789956007698287	-0.224205220796666	-0.841868375131757	-0.68757008764546	-1.01290442952153	0.705613471273397	1.43002842848968	0.637440591048482	0.363861669610128	0.0640716571532192	0.413399351637085
ENSG00000164532	TBX20	Hepatic Endoderm	-1.08719605658037	-0.498133791498043	-1.08719605658037	-0.610476986005821	0.213784556853733	-0.304418664765814	1.04506266685879	1.21833472159816	0.0080288407860154	0.273737362229468	0.519488269908015	0.308985137196228
ENSG00000234507	BRD2	Hepatic Endoderm	-0.302188221688223	-0.927048894122909	-0.142094757164775	0.522060824999294	-0.104304073780577	0.16062665603428	1.93799888490327	0.515767789755182	-0.358806811628297	-0.13491732020074	-0.647987059194326	-0.519107017912178
ENSG00000153822	KCNJ16	Hepatic Endoderm	-0.609155870062829	-0.609155870062829	-0.609155870062829	-0.609155870062829	-0.609155870062829	-0.609155870062829	1.52310285337633	0.528474546288105	0.486069027303554	-0.131863724353981	0.997528456425554	0.251624061337412
ENSG00000105810	CDK6	Hepatic Endoderm	-1.45458186157491	-0.537720402516248	-0.979307023194196	0.104810859863449	-0.447012991425006	0.123202545569642	0.844672095841402	0.794777379245795	0.447482447785367	0.375905750068735	0.906033442859745	-0.178262242523773
ENSG00000146038	DCDC2	Hepatic Endoderm	-0.718014877063263	-0.718014877063263	-0.511924605850235	-0.718014877063263	-0.718014877063263	-0.718014877063263	1.0547856969731	0.811065607268485	0.760113963536925	0.117308182226862	0.68055922444785	0.678166316713332
ENSG00000159479	MED8	Hepatic Endoderm	-0.876748766114922	-0.68432587547046	-1.06729786933976	-0.438959440238786	0.0275924728813166	-0.49061074873823	1.27117962616252	1.0813317647225	0.637338230342222	0.292521591611458	0.125185960958329	0.122793053223811
ENSG00000066739	ATG2B	Hepatic Endoderm	-0.410995476225238	0.588488093583899	-0.163842456265022	-0.606258204046093	-0.558398918900246	-0.967745654738922	0.828796556427077	0.763734940812999	-0.0311389595775982	0.588256764942402	-1.09620870773086	1.0653120217176
ENSG00000072958	AP1M1	Hepatic Endoderm	-0.763881098336703	-0.467919939296007	-0.857903894906453	-0.903467772878692	0.129942999192085	-0.562655520536064	0.630859390350811	1.16311924674168	1.1918472889254	0.363084102538498	-0.187928786720832	0.264903984926282
ENSG00000137960	GIPC2	Hepatic Endoderm	-0.327622140984656	-0.399872164127951	-0.51817124420949	-0.466300244891607	-0.450283110486557	-0.724261515422518	-0.155321441669871	1.36580197523547	1.12278595676701	0.397672147351162	-0.724261515422518	0.879833297861523
ENSG00000158710	TAGLN2	Hepatic Endoderm	0.343763232813116	0.139146680416454	0.0422205309122665	-0.88533469963466	-0.451547319641973	-0.693247483054767	1.4783456145386	-0.179004935553255	0.938740200248459	0.539576841168841	-0.263377133562468	-1.00928152865061
ENSG00000090061	CCNK	Hepatic Endoderm	0.32901796986489	0.390990258571138	0.298801493263002	-0.758503490454968	-0.124155037773169	-0.801896341483908	1.34065361707904	0.479174812472316	0.605090078011209	-0.0642022323974345	-0.26983547594485	-1.42513565120727
C8ORF4	NA	Hepatic Endoderm	-0.705476501198117	-0.705476501198117	-0.705476501198117	-0.705476501198117	-0.705476501198117	-0.705476501198117	0.847261201805138	0.735243017442498	0.854369503686569	0.655456917611719	0.449823674064303	0.690704692578478
ENSG00000109083	IFT20	Hepatic Endoderm	-0.645659168677734	-0.857567122562037	0.0845507445073799	-0.599605852031126	-0.857567122562037	-0.413727231359253	1.10612889482964	1.11135514444295	-0.000175357967440171	-0.0222440632719123	0.00494727937037709	1.0895638552812
ENSG00000121690	DEPDC7	Hepatic Endoderm	-0.563843598856993	-0.335441395849122	-0.0908518500847535	-1.80106571418603	0.333797658489951	-0.36745032087253	-0.00160919282560457	0.816189916024517	1.07454667322251	0.220794057421088	0.442706353330819	0.272227414186149
ENSG00000164879	CA3	Hepatic Endoderm	-0.6079428196186	-0.495461422208335	-0.273217191753669	-0.561889502971991	-0.545872368566942	-0.580929499977734	-0.250910699750256	0.945848184690366	0.739995231381783	-0.342558627794054	1.63961343711846	0.333325279450973
ENSG00000197608	ZNF841	Hepatic Endoderm	-0.740586788380571	-1.10795236565342	-0.867531356849483	0.126474543509885	-0.109248733631689	-0.104370127207196	0.211682446821543	1.68167320919732	0.632921682102049	-0.0156498966214533	0.427379036793492	-0.13479165008048
ENSG00000011198	ABHD5	Hepatic Endoderm	-0.363061793265061	-0.51340397451508	0.0162866696180064	-0.0808280534732844	-0.821890434848989	-0.543250493664725	1.95222450221372	-0.432835718006975	0.152100955120909	-0.204094222705599	0.0725462160318342	0.766206347495238
ENSG00000171867	PRNP	Hepatic Endoderm	-0.683461068392118	-0.431216314341878	0.00834532601679028	-0.409411524992079	-0.541260044394022	-0.800000334103294	-0.267941092419793	1.45362200765638	1.34901414052064	0.501513126845233	-0.0885400500436573	-0.0906641723522017
ENSG00000074695	LMAN1	Hepatic Endoderm	-0.567380840397513	-0.670734622113661	-0.381050918221468	-0.336144427834183	-0.656730019554194	-0.317735071739889	1.07199615467432	1.5318650432874	0.837722816054702	-0.312669884358963	-0.364922300448588	0.165784070652032
ENSG00000164647	STEAP1	Hepatic Endoderm	-0.283214584305188	-0.495122538189491	-0.495122538189491	-0.495122538189491	-0.495122538189491	-0.495122538189491	0.0738175355631561	1.03395794614226	1.79661286047444	-0.0178303924806427	0.367391863742923	-0.495122538189491
ENSG00000179335	CLK3	Hepatic Endoderm	-0.0960178387073163	-0.951617975649795	-0.333889459874946	-1.01804605641345	-0.102991564356317	0.0113937790547518	0.0169510341011825	1.4214549060181	0.36117428840181	-0.798715181235515	0.819180417762629	0.67112365089887
RP11-968A15.8;COPZ1	NA	Hepatic Endoderm	-0.188896636819727	-0.779823859974449	-0.31584120528864	-0.248052368545662	0.442441417929154	-0.44246935677863	0.763372598382386	1.25021846839413	0.411541422123566	-0.246952462283093	-1.36888612505677	0.723348107917744
ENSG00000184985	SORCS2	Hepatic Endoderm	-0.0112786832213319	-0.718693594448985	-0.172060012699752	-0.718693594448985	-0.718693594448985	-0.718693594448985	0.257205538437299	0.972362930048611	0.918488020897188	-0.241401448740137	1.37649415025801	-0.225036117183939
ENSG00000162851	TFB2M	Hepatic Endoderm	0.0295624854342398	0.576625160486077	0.572459783719703	-0.308315678736895	-0.715684849447952	-0.846797883857715	1.7273726096215	0.220520915418454	-0.162486017249841	-0.568289257692587	-0.735624888345717	0.210657620650735
ENSG00000139540	SLC39A5	Hepatic Endoderm	-0.657117898743036	-0.657117898743036	-0.657117898743036	-0.657117898743036	-0.657117898743036	-0.657117898743036	0.318781234143248	1.17955086485034	0.821010941857152	0.178205160547088	0.498182276519384	0.946976914541004
ENSG00000116704	SLC35D1	Hepatic Endoderm	-0.519275120671627	-0.75526492629102	-0.388807115758735	0.386105663200206	-1.07965427758559	-0.456414967862225	-0.51071420383294	1.22587650059294	0.398474563014601	1.0995874518191	0.0756458976768331	0.524440535698453
RP5-972B16.2	NA	Hepatic Endoderm	-0.242538040537284	0.498033090160604	-0.931706121317251	-0.651460658865502	-0.145077057029758	-0.53531542780325	1.44769644866851	0.122626699022812	0.973642579046125	-0.840800673908956	-0.162792644355384	0.467691806919333
ENSG00000021852	C8B	Hepatic Endoderm	-0.580062298746275	-0.580062298746275	-0.580062298746275	-0.580062298746275	-0.580062298746275	-0.580062298746275	-0.011122224993628	1.38885996825871	0.898066541853914	-0.102770153037427	1.02662202774211	0.280717632653966
ENSG00000162496	DHRS3	Hepatic Endoderm	-0.329668405777808	-0.300985297609443	-0.343413980942535	-0.890047562691768	-0.616069157755808	-0.890047562691768	1.24221116074739	1.20001592796622	0.747134052654405	-0.0547245034016433	-0.0275331607593539	0.263128490262108
ENSG00000198380	GFPT1	Hepatic Endoderm	-0.944442613444624	-0.534303637745838	-0.672862978147893	-0.487934214338275	-0.420723383930453	-0.84746779609512	0.991990008930036	1.1096986924787	0.686940714709537	0.45970021771587	0.257434333612596	0.401970656255463
ENSG00000106688	SLC1A1	Hepatic Endoderm	-0.512535496616128	-1.10346271977085	-1.00167782302632	-0.707798224436983	0.0301654456953093	-0.302413412395951	0.080275589183187	0.66219492042211	1.18162810075729	0.486716744551512	0.534575249982431	0.652331625654391
ENSG00000175104	TRAF6	Hepatic Endoderm	-0.283630362633944	-0.311847940206009	0.217842703927077	-0.457839690417906	0.0485439114178376	-0.341694459355654	1.4200959155451	0.965591639487779	0.786254519724798	-0.289148791880084	-0.629695594438782	-1.12447185117021
ENSG00000215252	GOLGA8B	Hepatic Endoderm	-0.708885510555537	-1.09191107048862	-0.869666840033957	0.240728833716441	0.478532276218489	-0.128899315784076	1.00348109910617	0.614463592526094	0.220881193562982	-0.939008276074342	0.810799813052414	0.369484204753946
ENSG00000023171	GRAMD1B	Hepatic Endoderm	-0.518411277513759	-0.636763923659088	-0.403880173192951	-0.391397488427414	-0.0528104261533664	-0.299409420463268	-0.249927055855128	1.68401145559287	1.06590920992252	-0.748534043032564	0.380858137746971	0.170355005035183
ENSG00000131370	SH3BP5	Hepatic Endoderm	-0.604776070792127	-1.16515522770609	-0.474308065879235	-0.688436157131541	-0.661017777075797	-0.108114226198703	0.967103495733072	1.1895646775692	0.472026387640085	0.400754504458155	0.233418873805026	0.438939585577953
ENSG00000174099	MSRB3	Hepatic Endoderm	-0.819740931392811	-0.495351580098244	-0.613650660179783	-0.819740931392811	-0.31560348076252	-0.819740931392811	1.14395508599886	0.620978587247805	0.275483965973572	0.541192487417025	0.968783267020649	0.333435121561065
ENSG00000281775	FTCD	Hepatic Endoderm	-0.424652143404419	-0.424652143404419	-0.424652143404419	-0.424652143404419	-0.424652143404419	-0.424652143404419	0.551246989481866	1.72236934723071	1.05347669719577	-0.424652143404419	0.0701241133270081	-0.424652143404419
ENSG00000096092	TMEM14A	Hepatic Endoderm	-0.665353698200862	-0.28819938700284	0.278786875556185	-0.619300381554254	-0.877261652085165	0.17977934942222	-0.308321578332518	1.47745825319012	1.26331792784082	-0.0419385927950402	-0.382485395353738	-0.0164817206849239
ENSG00000143353	LYPLAL1	Hepatic Endoderm	-0.645451577765397	0.35607513394005	-0.410748621923633	-0.518437788679051	-0.475868074218696	0.223031217615592	-0.783926415240404	1.52367599252849	1.16017124614437	-0.517543429702926	0.0457076125180631	0.0433147047835449
ENSG00000115109	EPB41L5	Hepatic Endoderm	-1.34942707424854	-0.455469047094128	-0.763762691322152	-0.649217841158571	-0.0552551455177808	-0.202251128273292	1.30787904634287	0.585536752574515	0.224708094028915	0.446207236322519	0.408350763211829	0.50270103513382
ENSG00000167468	GPX4	Hepatic Endoderm	-0.76463585318099	-0.641832953911572	-0.651303403925825	-0.785125539827598	-0.703049258654119	-0.258257025203827	1.04701168325127	0.913478549783076	1.00083128225862	0.273428603805864	0.167507881178615	0.401946034426483
ENSG00000103544	C16orf62	Hepatic Endoderm	-0.873624927811648	-0.16194667738954	0.658911145587257	-0.9312535156972	1.1509283786536	-0.612408785492021	-0.337355305927775	0.924366286658421	0.689578686676916	-0.148879343116559	-0.661949082110144	0.303633139968685
ENSG00000121769	FABP3	Hepatic Endoderm	0.360723577450158	-0.245174915415102	-0.429374185744848	-0.993358930762398	-0.977341796357349	-1.01239892776814	1.03185085232545	0.652990262386277	0.659406169601697	0.109613217516527	0.147253900217804	0.695810776549923
ENSG00000276681	LENG8	Hepatic Endoderm	-0.503816308909422	-1.16244685435277	-0.245281845488309	-0.316434131888147	0.074441226818549	0.347892633717635	-0.163337161550993	1.54745784303941	1.05973784143906	-0.548611562129356	0.10196290605121	-0.191564586746857
ENSG00000123983	ACSL3	Hepatic Endoderm	0.179208806043007	0.500531516864168	0.732787024958428	-1.03319631023435	-1.42474258486113	-0.641047757345178	0.942707035581395	0.635110291384137	0.0334072405768913	0.0104991362514015	-0.249803034038066	0.314538634819297
ENSG00000196511	TPK1	Hepatic Endoderm	-0.75911065644533	-0.158394699365433	-0.58463191202908	-0.136589910015634	0.329962003104468	-0.347779300606271	-0.402078536576986	0.865650153263744	1.3207167883343	-0.135695551039508	0.978970231705367	-0.971018610329633
ENSG00000117143	UAP1	Hepatic Endoderm	-0.655673274963287	0.113246871130423	-0.669418850128014	-0.549420271124945	-0.942074026941286	-0.159011430369862	1.82860392148918	0.0298385189018902	0.083290585208426	0.349857300286996	0.390631894611136	0.180128761899348
ENSG00000147100	SLC16A2	Hepatic Endoderm	0.215314652560619	-0.73766794061771	0.445201206903421	-0.227628591598279	-1.06205729191228	-0.135640523634134	0.230901069133267	1.43090281141757	0.718370255268062	-1.06205729191228	0.0932428833501424	0.091118761041598
ENSG00000136936	XPA	Hepatic Endoderm	-0.471795898618769	-0.645640100977608	-1.10515180510658	-0.186025446070023	0.243047311145864	0.0886799508129767	-0.358827025810271	0.550030534129932	1.12319584497318	-0.529851724082135	1.34002893317521	-0.0476905735717752
ENSG00000134333	LDHA	Hepatic Endoderm	-1.02986987417614	-1.08643895506748	-1.18424326056291	0.417590621424071	0.688736742947339	0.277201334770748	0.188001048726181	0.490272769509787	1.03433317306063	0.0754340041416075	0.0323145855159339	0.0966678097102331
ENSG00000221926	TRIM16	Hepatic Endoderm	0.112048468337804	-0.246569691450842	-0.370276255518954	-0.946602104712541	-1.14934277035113	-0.135920069287973	0.540374842104589	0.723700315348038	1.38548048501222	0.625272902876662	-0.268021000024667	-0.270145122333211
ENSG00000214719		Hepatic Endoderm	-1.0302404610646	-0.236003129070698	-0.855761716648352	-0.765429344374359	0.0588321984851956	-0.315731646670761	-0.266249282062621	0.847915075709083	1.2292615722711	0.118785003860931	0.364535911539478	0.850085818025612
ENSG00000100243	CYB5R3	Hepatic Endoderm	-0.552170786153947	-0.76407874003825	0.288966179729884	-0.506117469507339	0.268507305523788	-0.525157466513081	-0.76407874003825	0.676640778602366	1.20763423256874	0.801830992125993	-0.76407874003825	0.632102453738345
ENSG00000133121	STARD13	Hepatic Endoderm	-0.933137459531752	0.175573539019003	0.0147119558583522	-1.16383330018486	-0.93797218984735	-0.353151264760291	1.01886223620976	0.50646911987572	0.500027209166579	0.104800981391905	0.922416917025201	0.145232255777731
ENSG00000135540	NHSL1	Hepatic Endoderm	-0.593550418371651	-0.577838835616538	-0.270151404276094	-0.0179296839873171	-1.33879775325384	-0.800601303558724	0.200243638658125	0.601455073174415	0.997693392503819	0.676075814337789	0.504391357640615	0.619010122749408
ENSG00000164187	LMBRD2	Hepatic Endoderm	-0.590482696613902	-0.400606282574546	-1.04590862553834	-0.0419713299668634	-0.340665075475193	-0.691040664090715	-0.574896280041254	1.16797352930495	0.940947019212512	0.740402842613778	0.359245593748806	0.477001969420766
TECR;MIR639	NA	Hepatic Endoderm	-0.553712468381759	-0.921078045654605	-0.481516405295937	-0.748975196202614	-0.432721343184704	-0.157804250010163	0.0390986174175558	0.885402636832097	1.32042394199486	0.964471121391268	-0.127017630130422	0.213429021224427
ENSG00000165092	ALDH1A1	Hepatic Endoderm	-0.71798773723462	-0.393598385940052	-0.71798773723462	-0.71798773723462	-0.71798773723462	-0.71798773723462	0.834749965768635	1.04771122095865	0.581355279851053	0.403945925539061	0.680586364276494	0.435188315719256
ENSG00000149257	SERPINH1	Hepatic Endoderm	-0.191582250855172	-1.00758082624901	-0.0469975317486027	-0.771361353012101	-0.734120124991663	-0.636426264070038	1.05794810752306	0.958192697372207	0.932174653638403	0.312345384200894	-0.119532226154034	0.246939734346059
ENSG00000143612	C1orf43	Hepatic Endoderm	-1.08631512877275	-1.10906436848722	-0.487178290268234	-0.021586988423369	0.349978842848417	-0.123527786148404	0.778731715548233	1.26285018131719	0.714311196916961	-0.00683150153553669	0.126312737602108	-0.397680610597393
ENSG00000025156	HSF2	Hepatic Endoderm	-0.420511949036443	-0.124550789995747	0.402634925534603	0.255392678493589	0.639410395859771	-0.818030646932071	-1.32812471515565	1.37747926543363	0.400840860525578	-0.124782118637244	-0.51549964962847	0.255741743538453
ENSG00000103187	COTL1	Hepatic Endoderm	-0.0597719081317969	0.320753196188172	-0.0119829843308792	-0.349941719750694	-0.892561370844633	-1.35622027823152	1.26971475594907	0.60667436922906	0.185285995423651	-0.473207888983008	0.0115427747316947	0.749715058750876
ENSG00000196535	MYO18A	Hepatic Endoderm	-0.249056263067697	-0.68434855797492	-0.705051514169814	-0.876373281394974	-0.442585901402287	-0.93468327353302	0.558681479078196	0.874000772095638	0.947701618488146	0.318141687593522	0.598364168810194	0.595209065477017
ENSG00000166579	NDEL1	Hepatic Endoderm	-0.707800137018453	-0.794125159207048	-0.684581528084595	-0.412607215110282	-0.171440955558554	-0.893813757741487	1.24445555392935	0.871716707022697	0.504097251368771	0.0727920607760355	0.551683344151427	0.419623835472143
ENSG00000196542	SPTSSB	Hepatic Endoderm	0.618377598969958	-0.0699320804206134	0.283123521566479	-0.658994345502938	-0.658994345502938	-0.658994345502938	-0.0900542717502915	0.87008613882881	1.48158523442305	-0.658994345502938	-0.658994345502938	0.201785585897303
ENSG00000213983	AP1G2	Hepatic Endoderm	-0.657727617518292	-1.17417975475999	-0.676623090506094	0.32731420506538	0.550038047921946	-0.108457533597333	-0.522669973168271	0.591494384603432	0.694175352774292	0.550024972109193	1.06440018173005	-0.637789174654315
ENSG00000142676	RPL11	Hepatic Endoderm	-0.39044593210874	0.10073613858556	0.0123127716705191	0.0028258725992174	0.117266488101852	-0.472467189499636	1.08431437670481	1.24715378122785	0.716576763343785	-0.636425745582689	-0.909542447073322	-0.872304877969213
ENSG00000226846	LINC00348	Hepatic Endoderm	-0.536070134430949	-0.536070134430949	-0.536070134430949	-0.536070134430949	-0.262091729494989	-0.536070134430949	0.0328699393216976	0.0626463130990698	1.24435741274939	-0.536070134430949	1.07061419205743	1.06802467885309
ENSG00000124785	NRN1	Hepatic Endoderm	-0.277364063862507	-0.48927201774681	-0.102885319446257	-0.48927201774681	-0.48927201774681	-0.48927201774681	1.64298670569235	0.857319545773796	0.810070999338863	-0.48927201774681	0.00550423898461672	-0.48927201774681
RP11-196G11.1;VKORC1	NA	Hepatic Endoderm	-1.34453551005572	-1.02875704254394	-0.5964690754613	-0.213921390921362	0.281760386850367	-0.419584124066487	0.726499620060834	0.76077250504397	0.781192074447584	0.316600526693329	0.369906865502411	0.366535164450304
ENSG00000108582	CPD	Hepatic Endoderm	-1.12006677419382	-1.16527877233288	-0.201903144765241	0.203011051125486	0.353136095354068	0.0974018555480107	0.888050400853164	0.863990522069157	0.572495118228074	0.505827221713216	-0.214677411307783	-0.78198616229146
ENSG00000145740	SLC30A5	Hepatic Endoderm	-0.529648438860443	-0.597034428087522	-0.905901839050232	-0.0594018762806217	-0.0394421069131541	-0.391016608305346	0.935246736723517	1.10522739686654	0.874756154826166	-0.233918608461244	-0.806476011377547	0.64760962891989
ENSG00000167110	GOLGA2	Hepatic Endoderm	-0.978643001765182	-0.662864534253401	-1.09996641859673	0.254669717059929	-0.282247169062592	-0.299304356134082	0.509774322048235	1.28379964561031	0.518966285590917	-0.20742086807433	0.306954341546528	0.656282036030394
ENSG00000163435	ELF3	Hepatic Endoderm	-0.552341324121826	-0.764249278006128	-0.764249278006128	-0.506288007475217	-0.061669097094073	-0.52532800448096	1.36800944543303	1.00144968018714	-0.191790367914354	0.801660454158114	0.0982651239262857	0.0965306533941126
ENSG00000117450	PRDX1	Hepatic Endoderm	-0.251980065822763	0.558030257967538	0.478924465728709	-0.610415881309792	-0.437213515616437	-1.05028031434684	0.500088558102496	0.538696064412806	1.33315798524607	0.180210580119688	-0.930327637181837	-0.308890497299642
ENSG00000154229	PRKCA	Hepatic Endoderm	0.111119443552216	0.272860570424916	0.146454924915793	-0.808605477205945	-1.13889672688965	-0.58599317601256	1.3145213548009	0.0480223469776515	0.204013294669588	0.766604123699748	0.452153567187047	-0.782254246119703
RP11-9M16.2	NA	Hepatic Endoderm	0.0367046213242586	-0.926261470889959	0.580997027925739	-0.259629310137657	0.246754291698087	-0.482421579687176	-0.926261470889959	1.42845843438532	0.710920144456213	-0.448969325181111	0.472312630621154	-0.432603993624913
DDX46;C5ORF24	NA	Hepatic Endoderm	-0.63349841524019	-0.0239925037998443	-0.643751091377499	-0.772176519147141	-0.526000339047761	-0.791216516152883	1.10212093376111	1.11688370095707	0.680443932030762	0.535771942486191	-0.167623387745638	0.123038263275824
ENSG00000196975	ANXA4	Hepatic Endoderm	-0.911757054613205	0.26499442922304	-0.911757054613205	-0.435037984038659	-0.637778649677245	-0.288517744889843	0.0641420782730791	0.992553409066381	1.11846867460527	-0.434464908904357	0.486817046897908	0.692337758670835
ENSG00000008405	CRY1	Hepatic Endoderm	0.0671076721619563	0.266625259492242	-0.0787114182194482	-0.087558748562135	0.0576137447939358	-0.250528071513773	1.71894043396212	0.210822511803182	-0.080267038287559	0.0576006689811832	-0.384309082694183	-1.49733593191752
ENSG00000044090	CUL7	Hepatic Endoderm	-0.822904461860345	-0.89515448500364	-0.833157137997654	-0.552911675545905	-0.186957790736169	0.0678572697009074	0.0734145247473381	0.927477654336918	0.560883710882133	0.141389582511629	1.3434254514864	0.176637357478388
ENSG00000144746	ARL6IP5	Hepatic Endoderm	-0.355189554506078	-0.359345772189066	-0.748329173770212	-0.815780973197723	-0.756957541558597	-0.785360109510251	0.590317586318839	0.890206997075726	0.564877213574449	1.03159242093346	0.574583978289361	0.16938492854009
ENSG00000124299	PEPD	Hepatic Endoderm	-0.500104769021607	-1.0165569062633	-0.794312675808638	-0.356219497141681	-0.463947842783517	-0.558168865743317	1.20362150915743	0.860869663427877	0.689279471660608	0.224963474606371	0.265738068930512	0.444838368979265
ENSG00000012822	CALCOCO1	Hepatic Endoderm	-0.286713702713286	-0.314931280285351	-0.921464920036522	-0.14282843083336	-0.424975010337495	-0.683715300046767	-0.558615117496904	1.45071459758421	0.958902347092199	-0.00562152847587027	0.271018910261563	0.658229435287586
ENSG00000175155	YPEL2	Hepatic Endoderm	-0.982648173374666	-0.982648173374666	-0.982648173374666	0.138185583136445	-0.280067992462611	0.304752932624448	-0.41370809962202	0.92166229030492	0.864399298814865	0.583261558789576	0.415925928136447	0.413533020401929
ENSG00000134330	IAH1	Hepatic Endoderm	-1.261419388545	-0.328759459975196	-0.605013843214731	0.085866461480633	-0.239544622573987	-0.731641994704721	0.761722757906496	1.11372359145857	0.482520816943119	0.8543044791423	-0.259484661471752	0.127725863554272
ENSG00000081051	AFP	HE_HLC	-6.13111433315562	-5.17818567742498	-6.0410355056017	-3.44429552978519	-5.28275288238391	-1.51427920618933	3.84708196237119	4.25928318220695	5.16920161221743	5.16732747084653	4.28388468524428	4.86488422165434
ENSG00000171564	FGB	HE_HLC	-4.70339906657994	-4.32624475538192	-4.91530702046425	-3.93058026004806	-4.21272683955219	-1.54155900088339	3.84032339926317	4.11369951499261	4.81756012174033	3.95392480164884	3.17123081798464	3.73307828728017
ENSG00000168542	COL3A1	HE_HLC	-4.67855274775434	-4.48612985710988	-3.56793362337651	-3.33126689772871	-4.04260607663017	-3.33472678452341	3.70285405844318	3.76109035178435	2.04542453600242	4.84365369520745	4.47410726524472	4.61408608044089
ENSG00000167244	IGF2	HE_HLC	-3.88834134005025	-3.58961096539969	-3.90490908945105	-3.61102949086171	-3.89317607036584	-3.66933948299976	3.94821766176761	3.14189165255413	2.53492389604644	4.18877363709611	4.38559130883092	4.3570082828331
TFP1;TF	NA	HE_HLC	-4.14012848772928	-3.72414395120295	-4.33067759095412	-3.55204110175096	-4.26278945723119	-2.33444453170502	2.7592210564162	3.75111044762814	4.60536668808884	3.83295978716055	3.57559285329952	3.81997428798027
ENSG00000084674	APOB	HE_HLC	-3.66163864822591	-3.73388867136921	-4.05827802266377	-3.80031675213286	-3.55414057203348	-2.88146404566769	2.47105720304654	2.5895135005762	3.46632660729382	4.40578240130825	4.31838042845354	4.43866657141457
IGF2;INS-IGF2	NA	HE_HLC	-3.7581741863699	-3.16911192128757	-3.37178748806935	-3.7581741863699	-3.7581741863699	-2.83175741809175	3.87644975849801	3.08539426094462	2.43971049665777	3.82063029080432	3.93946491203134	3.4855296676223
ENSG00000277377	SERPINA1	HE_HLC	-3.2627690389515	-3.2627690389515	-3.2627690389515	-2.59613687819919	-3.2627690389515	-2.47999164713694	2.28955161330356	3.08745275066023	3.83066332136917	3.26038135255859	2.64197316705891	3.01718247619167
ENSG00000139329	LUM	HE_HLC	-3.32261695077228	-3.32261695077228	-3.32261695077228	-2.65598479001998	-2.81847950014199	-2.1458029737762	3.2142492522832	2.82619792754184	1.6256457822666	3.77200319345212	3.11885761477732	3.03116434593392
ENSG00000171560	FGA	HE_HLC	-3.04570304140334	-3.04570304140334	-3.04570304140334	-3.04570304140334	-2.77172463646738	-2.60186315020055	2.03638064008247	2.35174028914857	3.61957422282837	3.36889895552467	2.82917778100032	3.35062806369685
ENSG00000118271	TTR	HE_HLC	-3.20260488286777	-2.8782155315732	-3.20260488286777	-2.94464361233686	-3.20260488286777	-2.02579090587169	2.50458667421516	2.95316556526407	3.56295257171501	2.95894200237276	2.5680230390657	2.90879484575236
ENSG00000147257	GPC3	HE_HLC	-2.55814373433628	-2.28830616620647	-2.29247154297284	-3.09569565592894	-3.96654427098734	-3.11096215190014	2.7630503216326	2.69737327373773	2.93280833962242	2.92067981418242	2.88244049469395	3.11577127846288
ENSG00000163359	COL6A3	HE_HLC	-2.79828894857303	-3.19492832301089	-2.98883805179786	-2.36049962269689	-2.92094991807493	-2.57168901328753	2.84465018578164	2.57310614708379	1.10303173826256	3.12370996332748	3.62122209547704	3.56947374750863
ENSG00000145192	AHSG	HE_HLC	-3.06016039442485	-3.06016039442485	-2.85407012321182	-2.39352823367255	-3.06016039442485	-2.43692108470149	1.35290552335791	2.72142771774639	3.50478307309252	3.25137276196649	2.8147204279788	3.21979112071831
ENSG00000189334	S100A14	HE_HLC	-3.6918167907942	-3.6918167907942	-3.6918167907942	-1.71478771564653	-1.6432096368177	-1.09653312336437	3.45958063760711	4.30696506363858	3.32410459168354	1.50524938228662	1.45241664369022	1.48166452930513
ENSG00000163631	ALB	HE_HLC	-2.29711166907718	-2.29711166907718	-2.29711166907718	-1.82039259850264	-2.29711166907718	-2.29711166907718	-0.0139406154584174	-0.531412710883913	0.256386289642484	4.90514779034341	4.10303086155332	4.58673932869165
ENSG00000175899	A2M	HE_HLC	-2.49153578918338	-2.70344374306768	-2.70344374306768	-2.44548247253677	-2.70344374306768	-2.46452246954251	1.05882705305146	0.836370848780708	1.85524786613421	4.07806887288858	3.7175128160921	3.96584450351865
ENSG00000108821	COL1A1	HE_HLC	-2.41725873101889	-2.68018959913521	-2.67086749455095	-3.01609443952487	-3.21883510516345	-2.43577250859203	3.25343648792578	3.17457907110927	2.04000841335322	2.79719186002767	2.48866324295508	2.68513880261439
ENSG00000197635	DPP4	HE_HLC	-2.56982710941563	-3.27724202064328	-2.58639485881643	-2.80052295006874	-3.27724202064328	-1.88713044818606	2.28986523911177	2.33769570424865	3.03706218237364	2.92328841964741	2.74112384716063	3.06932401523132
ENSG00000171557	FGG	HE_HLC	-2.83824582155278	-2.83824582155278	-2.83824582155278	-2.17161366080048	-2.83824582155278	-2.21500651182942	0.760948912295966	1.94708048494168	3.61351923801321	3.42990565400584	2.59262574793437	3.39552342164995
ENSG00000123561	SERPINA7	HE_HLC	-2.13593247164484	-2.13593247164484	-2.13593247164484	-2.13593247164484	-2.13593247164484	-2.13593247164484	-1.16003333875855	-0.523591963392093	1.35311901794897	4.90814292907237	4.01293000484124	4.2250281801571
ENSG00000146674	IGFBP3	HE_HLC	-2.70433201529648	-2.91623996918078	-2.52985327088023	-2.65827869864987	-2.64226156424482	-2.472400077978	2.01399740744275	2.63682145157049	1.92986155543702	3.45801373153605	2.83260186428432	3.05206958595957
ENSG00000138207	RBP4	HE_HLC	-2.81534441972109	-2.81534441972109	-2.81534441972109	-2.33862534914655	-2.81534441972109	-2.03256702790654	2.18193588733566	2.76898685726264	3.16977249463156	2.59627152448254	2.34548250816608	2.57012078405899
SEPP1	NA	HE_HLC	-3.16024589839945	-2.55952994131955	-3.16606358107072	-2.53772515196975	-2.33956780672171	-1.63168851461496	2.11945658114233	2.44496687303293	2.73690322119947	2.93223900884335	2.43054849535777	2.7307067145203
ENSG00000091513	TF	HE_HLC	-2.52227787467156	-2.52227787467156	-2.52227787467156	-2.52227787467156	-2.52227787467156	-2.52227787467156	1.23999292144758	1.72587002404309	2.26566250407395	3.38968613164639	3.2044438285498	3.30801183826854
ENSG00000110244	APOA4	HE_HLC	-2.56225568590223	-2.56225568590223	-2.56225568590223	-2.56225568590223	-2.56225568590223	-2.32333441237706	0.786151388687221	2.43925722529841	3.09180747316264	3.1266113487757	2.59857124198495	3.09221416397926
ENSG00000118137	APOA1	HE_HLC	-2.73995579001028	-2.41556643871571	-2.53386551879725	-2.48199451947937	-2.73995579001028	-2.11671648028692	2.78232907349832	2.7594342181136	3.00426022534542	2.18650010249228	1.91178651141747	2.38374440643271
ENSG00000138449	SLC40A1	HE_HLC	-3.49356258118449	-3.49356258118449	-3.49356258118449	-0.754180371509083	-0.437011100627937	-0.814747355864988	1.36636385544972	1.34460515540651	1.0551559449078	2.99220215845902	2.98809279531418	2.74020666201824
ENSG00000115414	FN1	HE_HLC	-3.30815010763979	-3.21623893148022	-2.94293089198119	-1.31065740894137	-1.48709002117395	-0.966371567311795	2.24841693276984	2.36142451006076	1.89960047777508	2.09313822818052	2.34448001800954	2.28437876173258
ENSG00000148180	GSN	HE_HLC	-2.75200272017844	-2.15128676309854	-2.14196465851428	-1.97918391364655	-2.26133049315068	-2.34067136433938	2.15877579211217	2.8176774381085	3.04322361288477	1.69783622936677	1.80069775057974	2.10822908987591
ENSG00000164733	CTSB	HE_HLC	-3.02477552441084	-2.92357881965511	-2.24813873369166	-1.92267444787432	-0.691573813883249	-2.35986496582257	1.80605199702741	2.47408791236817	2.73046531927314	2.49480478435728	1.60392682439934	2.06126946791241
ENSG00000166482	MFAP4	HE_HLC	-2.80801670002037	-2.88026672316366	-2.9985658032452	-0.343652320711613	-0.0773380537278205	-0.792514445966423	0.794120067759706	1.09464189302287	-0.912920675794298	3.22314842882291	2.78613176220604	2.91523257081786
ENSG00000133135	RNF128	HE_HLC	-2.26315088269564	-2.26315088269564	-1.71651730094641	-2.00518961216473	-2.26315088269564	-2.02422960917047	1.77860603402988	1.83419732947435	2.40092210282097	2.5471302855742	1.71208302805125	2.26245039041786
ENSG00000109072	VTN	HE_HLC	-2.14364893165607	-2.14364893165607	-2.14364893165607	-2.14364893165607	-2.14364893165607	-1.69980904045329	1.61862186446307	1.68438633985193	2.56589296211973	2.37735047284126	1.86863203005801	2.30317002939965
ENSG00000158874	APOA2	HE_HLC	-2.48819212528701	-2.48819212528701	-2.48819212528701	-1.3673583687759	-1.61119371051266	-1.70541473347246	1.11100260856174	1.66583277071289	2.08040409799449	2.49302144605306	2.38108965504516	2.41719261025471
ENSG00000124942	AHNAK	HE_HLC	-3.36906560987131	-3.36207723953746	-2.96539703272922	-0.552921032262526	-0.246945356976989	-0.126301743272084	2.10784836564803	1.98221869994703	1.73919709800928	1.48537149520303	1.80049961533294	1.50757274050929
ENSG00000145824	CXCL14	HE_HLC	-2.33296225652871	-2.00857290523414	-2.12687198531568	-1.49853355621471	-1.82882480589842	-2.09404098300354	2.55078393654153	2.18723339328746	0.407386639013212	2.55579870167545	1.94573616666312	2.24286765501443
ENSG00000110169	HPX	HE_HLC	-2.04736042776127	-2.04736042776127	-1.84127015654824	-2.04736042776127	-2.04736042776127	-1.60352053655848	0.235810625857498	1.13190253071581	2.29745992064195	2.76292074050858	2.3481142786475	2.85802430778045
ENSG00000185559	DLK1	HE_HLC	-2.01496896231582	-2.01496896231582	-2.01496896231582	-2.01496896231582	-1.51083151168553	-2.01496896231582	0.849887345389947	1.54595890729381	0.826878416390344	3.38329480367379	2.32329881012529	2.65635804039143
ENSG00000131981	LGALS3	HE_HLC	-1.68209691875948	-1.75434694190278	-1.69234959489679	-2.07873629319735	-2.07873629319735	-2.07873629319735	2.2673222701297	2.91503401092434	3.13235920461497	0.78402300704417	0.913078026833679	1.35318581560423
ENSG00000120708	TGFBI	HE_HLC	-1.39683601627968	-1.77073984341157	-2.15371183728087	-2.10184083796299	-2.08582370355794	-2.3598021084939	2.05326380928886	2.62618381147776	2.16876101134554	1.63123207351457	1.9784656639472	1.41084797741301
ENSG00000184347	SLIT3	HE_HLC	-2.39904368052156	-1.80998141543924	-1.70819651869471	-2.14108240999065	-2.1250652755856	-1.61626628870701	1.36322711559758	1.98562238911579	2.26502930499505	1.55596644901116	2.6942324659941	1.93555786422508
ENSG00000106484	MEST	HE_HLC	-0.838990361540428	-1.28037974137217	-1.11982220614026	-2.83286813162681	-2.5281862021138	-2.49205587928418	2.97847595388688	2.01824131012816	0.56964270277457	2.10905360827885	1.74435412908343	1.67253481792575
ENSG00000105894	PTN	HE_HLC	-1.93999218146109	-1.0868323638969	-1.84991335390717	-2.06852957336131	-2.39882082304501	-1.61555716767619	0.141698079691119	1.17986590273101	1.40686032453962	2.4953054923143	3.10627336669945	2.62964229737216
ENSG00000133110	POSTN	HE_HLC	-1.6471576403837	-1.6471576403837	-1.6471576403837	-1.6471576403837	-1.37317923544774	-1.6471576403837	0.897410126331602	0.499863850251423	-1.07469873029193	3.22237996256802	3.16023569357764	2.9037765349295
ENSG00000134352	IL6ST	HE_HLC	-2.23417799248038	-2.19099879881639	-2.37519806914614	-0.899731392652972	-2.02412832210655	-1.53661731338127	1.94542314411164	1.05100381402004	1.48528878243886	2.54554094091361	2.05942507943923	2.17417012766032
ENSG00000099937	SERPIND1	HE_HLC	-1.90840670624806	-1.90840670624806	-1.90840670624806	-1.90840670624806	-1.6344283013121	-1.90840670624806	1.36984568144494	2.59006649671268	3.18413071611391	1.10207039363263	1.35329654505528	1.57705199959296
ENSG00000134762	DSC3	HE_HLC	-1.81536549414685	-1.88761551729015	-1.52115770675786	-1.9540435980538	-1.50942468767266	-2.21200486858472	3.61059352230403	2.24201689534572	1.09969567675092	1.32248799199669	1.10995907744462	1.51485870866407
ENSG00000166147	FBN1	HE_HLC	-1.15618417870967	-2.01178431565214	-2.13008339573368	-1.2153399104356	-2.33617366694671	-1.89233377574393	1.57259756436612	0.758750389463112	0.600498386700686	2.74868890418114	2.57293968467914	2.48842431383154
ENSG00000099139	PCSK5	HE_HLC	-0.967896432601115	-1.33283942651133	-0.920253935396826	-2.8758359359568	-2.11702419642873	-2.08986644453132	1.81099434482989	2.35282364831451	2.96068357591523	0.755223657935193	1.30211883121592	1.12187231321539
ENSG00000148677	ANKRD1	HE_HLC	-2.28584780494936	-2.28584780494936	-2.28584780494936	-1.30112104453316	-1.5832676240373	-0.545382467280563	2.97057283216072	0.947020833883957	0.710746122048514	1.99436831842724	1.53088198930317	2.13372445487549
ENSG00000164692	COL1A2	HE_HLC	-1.19409674663102	-2.00823358821421	-1.67206431899513	-1.8935451175813	-2.13738045931806	-1.7269777680933	1.91585850253112	1.7253845843269	0.366408005387794	2.30106775414204	1.95249282275748	2.37108632968767
ENSG00000100196	KDELR3	HE_HLC	-2.08452593464616	-1.76013658335159	-1.87843566343313	-1.82656466411525	-1.2075275198718	-1.84560466112099	0.335255586243204	2.21477203283494	1.44565451500155	2.41162030709455	2.06710483727028	2.12838774809439
ENSG00000130635	COL5A1	HE_HLC	-1.93064717030265	-2.32728654474051	-2.32728654474051	-0.501403233620573	-1.62470636382845	-0.666759773427181	0.332128062228656	1.10206218431724	0.101258782611651	1.86282603791594	2.80016031953657	3.17965424404982
ENSG00000162909	CAPN2	HE_HLC	-2.58618488379932	-2.73652706504933	-2.85830381418668	-0.505781145292911	-0.645483134634554	-0.680494225503983	1.87908182618558	1.49046367980812	1.30507113433211	1.61673749226808	1.73797054083896	1.98344959503393
ENSG00000125848	FLRT3	HE_HLC	-2.14812199801376	-2.14812199801376	-2.14812199801376	-1.16339523759757	-1.64398454738347	-1.36534460619921	2.23182923518182	1.16159600332029	1.69111828825383	2.37287740648357	1.53714136408887	1.62252808789315
ENSG00000226215	APOM	HE_HLC	-1.64291974389929	-1.53043834648902	-1.85482769778359	-1.85482769778359	-1.85482769778359	-1.85482769778359	1.42342468990941	1.15051926044093	1.19929820083008	2.33528488487286	1.91939728342813	2.56474456204126
ENSG00000136167	LCP1	HE_HLC	-1.61231919660762	-1.84830900222701	-1.35075233797312	-1.69597928294703	-1.47011817260952	-2.17269835352158	0.247083167367781	1.75622770559949	2.60673852507028	2.32344788821913	1.41775510486173	1.79892395476746
ENSG00000132855	ANGPTL3	HE_HLC	-1.57513623867461	-1.25074688738004	-1.57513623867461	-1.57513623867461	-1.57513623867461	-1.57513623867461	-0.282177877629067	0.190562719518657	1.84993610270689	2.99432080368002	2.0153172197087	2.3584691127679
ENSG00000064999	ANKS1A	HE_HLC	-1.70798276192829	-2.00591270684739	-1.60204435069203	-1.41112279149425	-1.80205248283616	-0.950185203978267	-0.0130362234794204	1.60466783200391	2.70843191105835	1.14628918768819	2.3845007454097	1.64844684509566
AGT;RP11-99J16__A.2	NA	HE_HLC	-1.72544134469322	-1.72544134469322	-1.72544134469322	-1.24872227411868	-1.72544134469322	-1.48652007116805	1.47906975721156	2.31291225321604	2.85299195736329	1.75938444904467	0.734022865928137	0.498626441295918
ENSG00000113249	HAVCR1	HE_HLC	-1.66854384515386	-1.66854384515386	-1.66854384515386	-1.66854384515386	-1.66854384515386	-1.42962257162869	1.45825279638606	2.52657361140622	2.68775755442216	1.34193325472683	1.08151181510298	0.67631276535371
ENSG00000087303	NID2	HE_HLC	-1.3224428086895	-1.71908218312736	-1.71908218312736	-1.46112091259645	-1.71908218312736	-1.71908218312736	2.44442991293243	1.28626477509716	0.191644187767649	1.42538279855781	2.09764761112517	2.21452316831515
ENSG00000100234	TIMP3	HE_HLC	-1.46219283708677	-1.58054548323209	-1.62297416656519	-1.50297558756212	-1.66547029768413	-1.93068647478925	2.45614389389275	0.835739209910096	1.06953099872901	1.63157500954298	1.72854980041859	2.04330593442612
ENSG00000137491	SLCO2B1	HE_HLC	-1.76650196113458	-1.76650196113458	-1.76650196113458	-1.50854069060366	-1.49252355619862	-1.32266206993179	0.778065805580729	2.28682799056734	2.66770597528474	1.31252400840664	1.43231339916446	1.1457950211339
ENSG00000169554	ZEB2	HE_HLC	-1.62820957340955	-1.62820957340955	-1.62820957340955	-1.62820957340955	-1.62820957340955	-1.62820957340955	1.03120503355962	1.57810518670288	0.843200413810457	1.95429723965826	2.05705378869308	2.30539577803297
ENSG00000127831	VIL1	HE_HLC	-1.23048175156462	-2.07132324010088	-1.86523296888786	-1.81336196956997	-1.19432482532653	-1.6274833488981	1.5843033086645	1.61017987337467	1.55682490049148	1.84674023082081	1.12749212019815	2.07666767079836
ENSG00000245532	NEAT1	HE_HLC	-1.90913148092455	-2.30577085536241	-2.30577085536241	-0.741208818147587	-0.887256714953531	-0.915659282905185	0.972481532330593	1.92930105650565	0.503030804936902	1.45424827166964	2.6983604925321	1.50737584968078
ENSG00000197712	FAM114A1	HE_HLC	-1.53416370791276	-1.79709457602908	-1.10245998817758	-2.13299941641873	-1.30873787355918	-1.82694109517872	1.89836143847334	2.2110496028365	1.57688582655503	1.15030064003877	1.54191228492316	1.32388686444924
ENSG00000163638	ADAMTS9	HE_HLC	-1.79067132583123	-2.00257927971553	-2.00257927971553	-1.52586020914099	-1.12558086494118	-0.94553827820815	1.85899231976279	0.7692030747259	0.665906426263538	1.71506713455392	2.30621125099755	2.07742903124891
ENSG00000243955	GSTA1	HE_HLC	-1.7027476887746	-1.7027476887746	-1.49665741756158	-1.44478641824369	-1.7027476887746	-1.46382641524943	0.717033832114757	1.91972709178141	2.75296781474055	1.56431191483851	1.43031302373333	1.12915964016996
ENSG00000282307	SERPINF1	HE_HLC	-1.04609623658585	-1.88693772512211	-1.68084745390908	-1.88693772512211	-1.61295932018615	-1.44309783391933	1.07061780719874	1.3459309137112	1.72214186669617	2.39327839825449	1.37476552618123	1.65014178280279
MIA2;RP11-407N17.3	NA	HE_HLC	-1.60554136235398	-1.60554136235398	-1.60554136235398	-1.60554136235398	-1.60554136235398	-1.60554136235398	1.59896973955081	1.51804698796055	2.4178103271242	1.66151824125914	1.05400162160422	1.38290125662494
ENSG00000169851	PCDH7	HE_HLC	-2.13185541347128	-2.51488097340437	-2.45288362639838	-0.431284261091681	-0.865502547523446	-0.243986657269109	1.97180327244887	1.22888210993919	1.51703107487708	1.44094579867767	1.17301063701515	1.30872058620031
ENSG00000168386	FILIP1L	HE_HLC	-1.57398111436947	-1.46149971695921	-1.78588906825378	-1.52792779772287	-1.51191066331782	-1.34204917705099	2.12288216305906	0.304174422404211	1.29616472934354	1.97413005877827	1.75471572441792	1.75119043967113
ENSG00000166825	ANPEP	HE_HLC	-1.51506325610378	-1.51506325610378	-1.51506325610378	-1.51506325610378	-1.24108485116782	-1.51506325610378	-0.222104895058234	0.933272557553012	2.27422844294214	2.11391090381007	1.97390864341907	1.74318547902066
ENSG00000147255	IGSF1	HE_HLC	-1.58705488912535	-1.54387569546136	-1.72807496579111	-1.30482114933357	-1.51743493577753	-1.62360421306142	1.72576577050115	2.14269361563394	2.16844522573723	0.984471879241836	0.938950918183279	1.34453843925291
ENSG00000081479	LRP2	HE_HLC	-1.43323158237425	-1.66922138799364	-1.60722404098766	-1.32697857853591	-1.71963233435225	-1.21083334747366	1.21090036261657	1.60863874652673	2.6424767552328	1.33104870327811	1.94359965736222	0.23045704670093
ENSG00000165682	CLEC1B	HE_HLC	-1.45441114503148	-1.45441114503148	-1.45441114503148	-1.45441114503148	-1.45441114503148	-1.45441114503148	0.0983265579717743	0.80019400716215	0.929956847241539	2.26323526923797	2.27601862856374	2.35873556001171
ENSG00000113083	LOX	HE_HLC	-1.29561652888791	-1.3678665520312	-1.69225590332577	-1.43429463279486	-1.69225590332577	-1.69225590332577	1.96337064543961	1.07952645111567	1.21349529604274	2.14894849440989	1.14296747963095	1.62623705705241
ENSG00000060971	ACAA1	HE_HLC	-1.1711575164632	-1.70939676310718	-1.11963432561005	-1.54849359773792	-1.80283224233711	-1.7850573352168	1.23498566406548	1.81200752220402	2.18330531747498	1.45569089845448	1.17243094362637	1.27815143464694
ENSG00000169116	PARM1	HE_HLC	-0.966280940518281	-1.68902667317897	-0.47621220507586	-1.83501842339087	-1.99751313351288	-1.87841127441981	1.77413616769755	1.75945584985575	2.04706794194911	1.45335954538955	0.933771712935771	0.874671432268956
ENSG00000003436	TFPI	HE_HLC	-0.940556101986441	-1.53148332514116	-1.42969842839663	-1.28611688990949	-2.12054559022349	-1.49730628050012	1.92121132650203	0.687008729482141	0.81612646342391	2.00621151510713	1.31487670685546	2.06027187478666
ENSG00000112964	GHR	HE_HLC	-1.77676713613589	-1.66428573872563	-1.60228839171964	-1.32204292926789	-1.28609490910814	-1.36543578029683	1.49056835563316	1.1630191129588	1.93015208891279	0.949832891201749	1.98655882072669	1.49678361582082
ENSG00000227315	NEU1	HE_HLC	-1.25002276396924	-2.18796390891206	-1.34191762499057	-1.62954715757544	-0.820390963837488	-1.53358242347694	1.25132833865565	1.35806891157218	1.497416731435	1.57527082910941	1.40989246437368	1.67144756761581
ENSG00000116016	EPAS1	HE_HLC	-1.72835033010765	-1.72835033010765	-0.675305410339512	-1.72835033010765	-1.45437192517168	-1.28451043890486	1.68695759722392	1.27699662811687	1.20832172353975	0.879907153592931	1.95691303199498	1.59014263027053
ENSG00000115919	KYNU	HE_HLC	-1.51972512323522	-1.51972512323522	-1.3136348520222	-1.51972512323522	-1.24574671829926	-1.51972512323522	0.900056397654137	1.42265658483731	2.20015903763797	1.17844795477485	1.39591724480749	1.5410448435506
ENSG00000113140	SPARC	HE_HLC	-1.65729545901691	-1.4837234797087	-1.46872795817153	-1.28923044202137	-1.38133755965587	-1.45219976497301	1.34574470572872	1.69647683627586	1.27368512997243	1.55582112876116	1.52785069233752	1.3329361704717
ENSG00000129757	CDKN1C	HE_HLC	-1.53860823361595	-1.53860823361595	-1.1522215353154	-1.28064696308504	-1.53860823361595	-1.53860823361595	1.00595953309935	1.4972199367758	1.39806382003145	1.06964925008463	1.72309501768739	1.89331387518563
ENSG00000011465	DCN	HLC	-1.38073878439008	-1.38073878439008	-1.38073878439008	-1.12277751385917	-1.38073878439008	-1.38073878439008	-0.087780423344531	0.0599807342505394	-0.523347019795479	3.46931585645712	2.51741876434293	2.59088352389897
ENSG00000113924	HGD	HLC	-1.22505645226774	-1.22505645226774	-1.22505645226774	-1.22505645226774	-1.22505645226774	-1.22505645226774	-0.249157319381454	-0.62634000473772	0.334789552616947	2.96505613038871	2.0366467990356	2.88934355568435
ENSG00000134871	COL4A2	HLC	-2.29977354425301	-2.64019111204989	-2.24258522721268	-0.0605056049352735	-0.292661741416908	0.202260781423834	0.785041907048099	1.60794801451117	1.07861568690166	0.315180612181387	1.62569962862474	1.92097059917687
ENSG00000117525	F3	HLC	-1.40158811372477	-1.79822748816263	-1.5921372169496	-0.813500727746442	-0.921229073388278	-1.55930621463746	1.85739906060275	-0.0325285299693641	0.112498882732374	2.04297690957303	2.17700642258426	1.92863608908615
ENSG00000145147	SLIT2	HLC	-0.985911703746164	-1.34836106175656	-1.66365918580791	-1.52007764732076	-1.32192030207272	-0.964394775177539	2.02544488556082	0.0477807160379129	-0.443779976739756	2.11635107239154	2.20012064352536	1.85840733510578
ENSG00000157514	TSC22D3	HLC	-0.972742155840055	-1.50196651358674	-1.00085330064925	-1.38727804295383	-1.47552575390291	-2.06427190826216	0.97113164618841	0.966443227490261	0.300689860834364	2.45507915536424	1.77058662372689	1.93870716159078
ENSG00000168209	DDIT4	HLC	-1.31797238550892	-1.21276338577237	-1.33454013490972	-1.35875513598427	-0.852371534148526	-1.24260990492202	-1.04948816385029	1.42674163928559	0.643098409242501	1.89267617418512	2.12624347517986	2.27974094720303
ENSG00000069702	TGFBR3	HLC	-1.58525452522858	-1.26086517393401	-1.03862094347934	-1.58525452522858	-1.31127612029262	-1.34633325170341	1.54154211631134	0.993015263605184	-0.107125684628388	1.79479309175062	1.90371737429427	2.0016623785335
IL1RL1;IL18R1	NA	HLC	-1.02919959704684	-0.704810245752272	-1.02919959704684	-0.771238326515929	-1.02919959704684	-0.790278323521671	-0.460259523294193	-1.02919959704684	-0.623529616715953	2.6447918398332	2.1696157632522	2.65250682090198
ENSG00000204262	COL5A2	HLC	-1.80470154027671	-2.90048704952244	-2.33350078696342	0.859743898679535	0.49674947221782	0.786293173559474	0.050916068425801	0.859147144357361	-0.108762435124563	1.2162190345363	1.16219298682298	1.71619003328786
ENSG00000133816	MICAL2	HLC	-1.44253808457161	-1.44253808457161	-1.44253808457161	-1.44253808457161	-1.44253808457161	-1.20361681104644	0.840632969047152	0.647525406086376	1.3662635757277	1.93750953240758	1.93727009258326	1.68710565805244
ENSG00000138795	LEF1	HLC	-1.30565715198295	-1.51756510586725	-1.31147483465422	-1.51756510586725	-1.24358670093129	-1.51756510586725	1.8308419687222	1.14125022546491	0.725523692892685	0.994798136257915	1.86224307128762	1.85875691054488
ENSG00000019549	SNAI2	HLC	-1.36276322167557	-1.36276322167557	-1.36276322167557	-1.36276322167557	-1.36276322167557	-1.1238419481504	0.600932795716104	1.44479109803006	0.115365618924617	1.71626274786564	2.22769023670774	1.8326155592841
ENSG00000138615	CILP	HLC	-0.84079603744025	-0.84079603744025	-0.84079603744025	-0.84079603744025	-0.84079603744025	-0.84079603744025	-0.84079603744025	-0.612493004315247	-0.84079603744025	2.83319539943979	2.35801932285879	2.14764658153867
ENSG00000205403	CFI	HLC	-1.37608771183887	-1.37608771183887	-1.37608771183887	-1.37608771183887	-1.37608771183887	-1.37608771183887	0.39671286219749	1.24301688161203	1.43271394846044	1.89097189177425	1.53955465620384	1.75355603078518
ENSG00000186480	INSIG1	HLC	-0.359580544519642	-0.798050952997171	-0.00728692736549874	-2.23722663036749	-2.20980825031174	-1.53713172394595	1.36954846474782	1.0242652163931	-0.0827801129159651	1.53685677217875	1.29833526077206	2.00285942833171
ENSG00000077943	ITGA8	HLC	-1.46691158358808	-1.14252223229352	-1.26082131237505	-1.46691158358808	-1.46691158358808	-1.46691158358808	1.7375995183167	1.68478261939091	0.563314145630397	1.47159639763386	1.36831179936864	1.44538539868039
ENSG00000164093	PITX2	HLC	-1.91940409624503	-2.62681900747269	-2.24043230917213	0.154253367032913	-0.196028181304323	0.377554346980081	1.28195222384015	0.954917606701919	0.535914194430057	1.00215515244116	1.05844435462994	1.61749234813795
ENSG00000142156	COL6A1	HLC	-2.07398001859004	-2.44134559586288	-2.09792097918573	1.00968509822968	0.154786982781029	1.27919032412315	0.700505954254177	0.722873837097382	-0.228322829635199	0.0130900967860352	0.962593599362977	1.99884353063941
ENSG00000101439	CST3	HLC	-1.34617700084391	-1.74281637528177	-1.74281637528177	-0.908387674967775	-0.324302234872896	-1.74281637528177	1.02297289300454	0.876288218169128	0.888349212744293	1.69057133271874	1.39024433722616	1.93889004266705
ENSG00000281216	KIF26B	HLC	-1.78961968014481	-2.00152763402912	-2.00152763402912	-0.436965596814296	-0.828511871441072	-0.425629927420476	0.764261634257196	1.09339642238071	1.77072271052876	1.00894946585157	1.93568276262131	0.910769348239355
ENSG00000150347	ARID5B	HLC	-1.32684355652358	-1.21436215911332	-0.992117928658651	-1.53875151040788	-1.53875151040788	-1.29983023688272	2.00171387262269	1.19634930349892	0.491474218810595	1.54027445913333	1.02421777737672	1.65662727055178
ENSG00000067082	KLF6	HLC	-1.62342896110757	-2.37459438889352	-1.44679818886522	-0.721954665040422	-0.650376586211586	-0.286842111696282	1.89823747329898	1.45504115581181	-0.0678181521620207	1.36150734833822	0.736438556890857	1.72058851963676
ENSG00000051108	HERPUD1	HLC	-1.35420800269544	-1.19921538015968	-1.18040355538698	-1.51189579992994	-1.30132535263946	-1.44526485753542	2.07332519243921	1.31325007522963	0.995502334998297	1.5995628676845	1.13805891245537	0.872613565539921
ENSG00000165966	PDZRN4	HLC	-1.40107992793455	-1.40107992793455	-1.40107992793455	-0.924360857360004	-0.89694247730426	-0.957240036731767	-0.425180795048266	0.688983562723438	0.570633044672439	2.44012446980111	1.73198078457338	1.97524208847758
ENSG00000075223	SEMA3C	HLC	-1.52500389144984	-1.33258100080537	-0.979525398818281	-1.44492419531315	-1.21906308497564	-1.47780337468491	1.12301308747873	1.3372993277688	1.58811926399238	1.22282171579747	1.71699383462904	0.990653716380775
ENSG00000137766	UNC13C	HLC	-1.75856120560251	-1.97046915948681	-1.97046915948681	-0.725269327480818	-0.247778728938329	-0.580357587029589	0.574098607228492	1.15311919082772	1.31744733320528	1.04000794039388	2.07793128907049	1.09030080729901
ENSG00000156510	HKDC1	HLC	-1.21000097525707	-1.21000097525707	-1.21000097525707	-1.21000097525707	-1.21000097525707	-0.971079701731899	0.0829573857884771	-0.0723705589061345	0.98274348357178	1.86902499428415	1.78181334477396	2.37691592850501
ENSG00000180210	F2	HLC	-1.30681386894097	-1.30681386894097	-1.30681386894097	-1.30681386894097	-1.30681386894097	-1.30681386894097	0.976357184677799	1.42828694496584	1.20622386619645	1.96024573467215	0.920286365894639	1.34948311723891
ENSG00000147655	RSPO2	HLC	-1.29291500498293	-0.968525653688361	-1.0868247337699	-1.29291500498293	-1.29291500498293	-1.29291500498293	1.12686651590643	0.611395458696658	0.00642801210274468	1.21944823714224	2.29753845340039	1.96533373014151
ENSG00000162998	FRZB	HLC	-1.85774487624357	-1.85774487624357	-1.85774487624357	-0.293182839028747	-0.135054445695085	-0.570343770244453	1.90452591987557	1.08463683182896	-0.379616035643379	1.34931922665736	1.27531583626437	1.3376339047161
ENSG00000140937	CDH11	HLC	-1.52614893196502	-1.36084513462307	-1.54504440495282	-1.00729971173153	-0.839800854889674	-0.976878848044056	1.90879633133944	0.440563899204348	0.104419566718724	1.30700101637876	1.68141002805602	1.81382704450887
ENSG00000115758	ODC1	HLC	-1.31916592574945	-1.27598673208546	-1.0299464666408	-1.44770331764967	-1.57955183705162	-1.10531804096759	1.31706271588507	0.812792038446151	1.8785143788736	1.34684214195017	1.0976761591912	1.30478488579841
ENSG00000164741	DLC1	HLC	-1.73228554883658	-1.94419350272088	-1.94419350272088	-0.379631465506061	-0.525679362312004	-0.767379525724798	1.18260313881903	1.59562108912751	1.10993239589278	1.26287060018005	1.25462185757815	0.887713826223679
ENSG00000140479	PCSK6	HLC	-1.32653455684929	-1.53844251073359	-1.33235223952057	-1.06172344015905	-1.26446410579763	-1.09460261953081	0.425253506658081	1.03982727810016	1.33571057487687	1.8416051062456	1.52572289846491	1.45000010824532
ENSG00000185070	FLRT2	HLC	-1.70586246995471	-2.26624162686867	-1.57539446504181	-0.219190806741166	-0.965261013434566	-0.00853432908934959	1.44369221627602	0.182094186788125	0.787884271744996	1.49377750016338	1.46418814672655	1.3688483894312
ENSG00000213949	ITGA1	HLC	-0.0697616101545266	-0.588509557568613	-0.457722825083018	-2.18165996955329	-1.677522518923	-1.94273869602812	0.862996383813133	0.792547844718491	0.954678252126579	1.69848573428567	1.35894482311841	1.25026213924829
ENSG00000156218	ADAMTSL3	HLC	-1.31612420733228	-1.52803216121658	-0.981398579467351	-1.27007089068567	-1.52803216121658	-0.74525476940203	0.604226562222576	1.31442856779507	0.443680811390405	1.4824449386641	1.73367109008675	1.79046079916159
CYP51A1;LRRD1	NA	HLC	-0.481298116277816	-0.468592475882474	-0.31622934712811	-1.79745337370078	-1.50418981867715	-1.99628260000678	0.641270696763735	0.474303058316668	0.201835005476998	1.93777230140424	1.34720444687286	1.96166022283861
ENSG00000169946	ZFPM2	HLC	-1.16400227006864	-1.39999207568803	-1.7243814269826	-0.479181594976602	-1.02180124607054	-0.797964658704453	0.820186339732707	-0.377789863461991	0.468363031846251	1.94961000989745	1.91425567353414	1.81269808094231
ENSG00000107249	GLIS3	HLC	-1.47151396707861	-1.27909107643415	-1.86815334151648	-0.883426581100284	-1.16557316060442	-0.691339364520391	1.33635776038831	0.903629012924959	1.68216008871471	0.64420990060869	1.67245145115522	1.12028927746244
ENSG00000133639	BTG1	HLC	-1.2343395843472	-1.35131332991547	-1.26807085437009	-1.62228096609124	-0.50473003330947	-1.19045697943185	0.506311183870086	0.924611289205086	0.712482119626097	1.23576124773368	1.86887597188663	1.92314993514375
ENSG00000165029	ABCA1	HLC	-1.9052504203628	-1.68069465226672	-1.54990791978113	-0.374477227720744	-0.330410820349701	-0.145431620114317	0.141462863080164	0.132357978907699	0.17287044924265	1.61491589395276	2.05792505110715	1.86664042430499
ENSG00000182326	C1S	HLC	-0.89464151434787	-0.680856122725843	-1.16676044473524	-1.38088853598754	-1.58362920162613	-0.931190838283944	0.686960160153216	0.1113146604429	0.114105366044901	2.09740252297064	1.63136429296076	1.99681965513415
ENSG00000150687	PRSS23	HLC	-1.11591904052542	-1.35190884614481	-1.28991149913883	-1.19957912686484	-1.17216074680909	-1.43737692391421	1.60195419025362	0.94280639601152	1.06405069810254	1.33417890244131	1.38786721175913	1.23599878482909
ENSG00000204291	COL15A1	HLC	-0.876602112534982	-0.876602112534982	-0.876602112534982	-0.618640842004071	-0.876602112534982	-0.876602112534982	0.0992970203513024	-0.64829907940998	-0.876602112534982	2.20242385700623	1.78294087142321	2.4418908478432
ENSG00000137872	SEMA6D	HLC	-1.29086583639784	-1.24768664273385	-1.8674452303115	-0.689269891397233	-0.442504385626126	-0.513366590943261	0.51195733967426	-0.284909661607066	0.0379034700518748	1.62631377522691	1.99413332285103	2.16574033121279
ENSG00000198796	ALPK2	HLC	-1.67835011543097	-1.3539607641364	-1.47225984421794	-1.01171795467867	-1.17421266480068	-0.621309113923585	1.27920541688988	0.980465215901195	0.660444921801451	1.40067585411025	1.75707218164797	1.2339468668375
ENSG00000160752	FDPS	HLC	-0.0839092506385102	0.0689708338915986	0.104583733133851	-1.69018597585121	-1.23706744596366	-1.69250906652038	-1.04219299913172	-0.151827202431994	0.151030977129148	2.34837837943613	1.42741658677191	1.79731143017484
ENSG00000158258	CLSTN2	HLC	-0.997462702917198	-1.39410207735506	-1.18801180614203	-0.917383006780514	-0.691521896443005	-0.770862767631698	1.2653125296141	-0.373520017927704	-0.536710312760464	1.38870989057288	2.29116128474757	1.92439088302312
ENSG00000164266	SPINK1	HLC	-0.997368650423361	-0.997368650423361	-0.997368650423361	-0.997368650423361	-0.997368650423361	-0.997368650423361	-0.0214695175370765	-0.769065617298359	0.783058896756979	1.94113933079858	1.91827371761935	2.13227509220069
ENSG00000151090	THRB	HLC	-0.806455863785447	-0.552711339858297	-1.33537706111673	-1.04758194255197	-1.60803223793001	-1.6430893693408	0.401160410752798	1.02782700146831	1.76495729580561	0.816162435144106	1.37969260843737	1.60344806297505
ENSG00000144619	CNTN4	HLC	-1.44548201207599	-1.25305912143152	-1.29548780476462	-1.00769268619985	-0.809535340951812	-1.39828149531107	0.923667881772464	0.816693944818315	0.826364319465223	1.64270440722404	1.646850513009	1.35325739444582
ENSG00000132561	MATN2	HLC	-0.699360337671803	-0.768769830874116	-0.522729565429455	-1.77491511675232	-1.27077766612203	-1.77491511675232	0.769652649962981	0.922547116210136	0.365664463173661	1.60513250022687	1.60489306040255	1.54357784362585
ENSG00000157502	MUM1L1	HLC	-1.20856388463029	-1.20856388463029	-1.20856388463029	-1.20856388463029	-1.20856388463029	-0.585324574906924	0.923694838808873	0.0373270661488503	1.17580410764273	2.05849571898283	1.85560152456822	0.57722074190685
ENSG00000144642	RBMS3	HLC	-1.9098143264694	-1.28792993468938	-1.19008672949979	-0.791345926577118	-0.805901694711125	-1.04133153108841	1.14504155842209	1.02519121262451	0.694471307638582	1.40895134764718	1.59933386849301	1.15342084820986
ENSG00000137962	ARHGAP29	HLC	-2.34009113269201	-1.37524760274007	-1.12485657837905	-0.57497001142865	-0.829308656027831	-0.294291788796997	0.312857221129448	1.31045637564023	0.916039703378823	1.32814661726265	1.49640136198099	1.17486449067247
ENSG00000146648	EGFR	HLC	-0.89549968507119	-1.60291459629884	-1.21652789799829	-0.768485895984845	-1.32893619136288	-1.15907470509606	0.816866924590517	0.845421217357948	0.825630731053316	1.1798973716291	1.77689358085603	1.52672914632521
ENSG00000184500	PROS1	HLC	-1.74503465856342	-1.42064530726885	-1.53894438735039	-0.1804726213486	-1.24089720793313	-0.568220681567337	1.53321772912958	0.913780672768743	1.22190941386057	1.03777730936452	0.602920654847688	1.38460908406063
IGF2;AC132217.4	NA	HLC	-1.07135919366183	-1.07135919366183	-1.07135919366183	-1.07135919366183	-1.07135919366183	-1.07135919366183	0.701441380374528	0.457721290669916	-0.0901554532410227	1.53689829003874	2.0617015188461	1.76054813528273
ENSG00000181722	ZBTB20	HLC	-1.34901117083606	-1.42126119397935	-1.53956027406089	-1.07901838452162	-0.868652130499563	-0.568836568277833	1.79481483775665	0.456165375711831	0.994698350268006	1.3333754242673	1.24616377475711	1.00112195941441
ENSG00000147872	PLIN2	HLC	-1.12843047872836	-1.73432897159362	-0.950985155036088	-0.76344518232416	-0.101603527351085	-0.783763667367829	1.21400120360943	0.0313080969696093	-0.829747886576818	1.48030237729209	1.8875951887538	1.67909800235302
ENSG00000120675	DNAJC15	HLC	-2.19108962783573	-1.8139353166377	-2.01661088341948	0.707318903796384	0.0826937203685842	0.919723374440196	0.362791686566284	0.662681097323171	0.785656351916544	0.676028387821185	0.795817778579005	1.02892452708155
ENSG00000115902	SLC1A4	HLC	-0.67929308040988	-1.19574521765158	-0.578016701876728	-1.26217329841523	-1.01599711831585	-1.07629467774336	0.0326031340571102	0.170921955551451	0.260292978234195	2.1538568679339	0.939329641675214	2.25051551696077
ENSG00000164251	F2RL1	HLC	-1.28675201634789	-1.75150004985659	-1.2218094057235	-1.09836402003499	-0.24982942849949	-0.988226254212143	1.43465218139715	0.720429704130968	0.838975568155412	1.62598862183566	0.56893675168715	1.40749834746826
ENSG00000152952	PLOD2	HLC	-1.85545823546679	-1.904351176344	-1.73346589397023	-0.11426599776708	-0.109657621425318	-0.185913686428207	1.01667805981222	0.447226931432671	0.891239160024987	0.91674564712058	1.0905720310832	1.54065078192796
ENSG00000164318	EGFLAM	HLC	-1.07875005705155	-1.29065801093585	-1.08456773972283	-1.03269674040494	-1.29065801093585	-0.667418701212493	0.841600712503304	0.238422473395893	0.346523604410318	1.71981908894483	1.45939764932098	1.8389857316882
ENSG00000176771	NCKAP5	HLC	-0.486839323683054	-0.973331837681249	-0.50934918299544	-1.08567503218903	-1.05825665213328	-1.56239410276357	-0.993454029010927	1.17270671114323	0.991103855956092	1.44808299711711	1.87302819431537	1.18437840192475
ENSG00000272414	FAM47E-STBD1	HLC	-0.739760173671028	-1.30013933058499	-0.913752632284435	-1.30013933058499	-1.30013933058499	-1.30013933058499	1.46564993770133	1.1481964830718	0.786318207756762	1.21222391154018	0.795048414122004	1.44663317410334
ENSG00000143344	RGL1	HLC	-0.526890645631141	-1.11781786878586	-0.76476226679877	-1.70688013386819	-1.00429995295613	-1.46795886034302	1.41991650767173	0.647839771407096	0.536208664891748	1.07593183405976	1.55482311743515	1.35388983291763
ENSG00000120549	KIAA1217	HLC	-1.48295845644654	-1.41783674680026	-0.862947471583074	-1.07328642568226	-0.996254061099202	-0.920428081773047	0.527430573813693	1.07142831569318	1.13164672193433	1.04381253275874	1.52082980224151	1.45856329694293
RP11-120I21.2	NA	HLC	-1.21505729357968	-1.21505729357968	-1.21505729357968	-0.957096023048769	-0.94107888864372	-0.976136020054511	0.0779010674658651	1.03954785861395	1.12373774365274	1.48311578443039	1.91800341892825	0.877176939394837
CTB-96E2.3;SARM1	NA	HLC	-0.990585329320323	-0.613431018122301	-0.816106584904073	-1.20249328320463	-1.20249328320463	-1.20249328320463	-0.226594150318341	0.701817180474961	1.93384493847524	0.976748446200061	0.586030915208835	2.05575545191982
ENSG00000111885	MAN1A1	HLC	-1.40014905359388	-2.03872579451353	-1.31007022603996	0.196301380727421	-0.389347368632611	-0.160791815345972	1.05219278152347	-0.458804682128511	0.108294841411905	1.07027256219241	1.64916581590599	1.68166155849327
COL3A1;AC066694.1	NA	HLC	-1.09938520723094	-1.09938520723094	-1.09938520723094	-1.09938520723094	-1.09938520723094	-0.860463933705768	1.18378584638783	0.869537059774051	-0.118181466810126	1.83912277399101	0.850603634804064	1.73252212171362
ENSG00000138772	ANXA3	HLC	-1.25564904876573	-0.736449083414826	-1.24808658210795	-1.41519839854687	-0.967457147567989	-1.24183330089169	1.13203756011216	1.02914293109391	1.12546194920837	1.09451130201947	1.3128967674664	1.17062305139475
ENSG00000134532	SOX5	HLC	-1.46657723701888	-1.35409583960862	-1.29209849260263	-0.433285358897193	-1.1743477402729	-0.391084084904073	0.285210826488489	0.899784597930573	0.232241179991819	1.26002279031876	2.05194458269203	1.38228477588263
RP11-231C18.3;PDGFRA	NA	HLC	-1.30341074805568	-1.81986288529737	-1.20213436952252	-0.78456152782219	-0.516003207582058	-0.856851130592826	1.81022322448932	1.28509649246581	0.560612471975567	1.06281186630899	0.847562083439084	0.91651773019388
ENSG00000179222	MAGED1	HLC	-1.60655564395933	-1.76110897878309	-1.98082801681466	-0.0762114655546924	-0.390253914568416	-0.0624206309191138	1.41120815445709	1.11882481966726	0.727474879357032	0.725829122490313	0.758974058336269	1.13506761629132
ENSG00000149212	SESN3	HLC	-0.894167678531216	-0.865484570362851	-1.24845656423215	-1.45454683544518	-0.950409384814885	-1.21562556192001	0.828624218173588	0.514375431559812	1.48212521820222	1.05781640667999	1.00491737517618	1.74083194551449
ENSG00000082438	COBLL1	HLC	-0.750645562480879	-1.31102471939484	-1.10493444818181	-0.834305648820292	-0.608444538482783	-0.528247327580285	-0.0180663583492935	0.380031805102757	-0.738565809303064	1.76800125014638	2.06878345776003	1.67741789958408
ENSG00000167508	MVD	HLC	-0.369868981845214	-0.58746839766102	-0.547458257357574	-0.809516924167278	-1.17771834139892	-1.61087686497049	-0.761758395127727	0.347570307499403	0.284078281059148	2.16605987859064	1.26724718985606	1.79971050552296
ENSG00000177189	RPS6KA3	HLC	-1.47715333128269	-0.70823318518898	-1.3466853263698	-1.37090032744435	-1.00494644263461	-0.750131382197536	1.00712386516977	1.02814619084655	0.95906143880122	1.54497432487116	1.02663292100186	1.0921112544274
ENSG00000123684	LPGAT1	HLC	-1.60852009196905	-1.3097897173185	-1.92954830489615	-0.338905928049041	-0.342167226021219	-0.427766838547469	0.103846517692655	1.1586200237585	1.53957777544481	1.2665718098711	0.94576824810663	0.942313731927737
AC144449.1	NA	HLC	-0.898664242710161	-0.786182845299897	-0.724185498293911	-0.852610926063553	-1.11057219659446	-1.11057219659446	2.75099940288386	-0.0899901371671081	0.736475275595068	0.0113614661792161	1.23738311681665	0.836558781248768
ENSG00000131781	FMO5	HLC	-1.67639754210321	-0.769528340504919	-0.80963419081991	-0.771016758231379	-0.818262558608295	-1.31035993073903	0.0463943546015919	0.460685533945287	1.56935740691092	1.64336900482179	1.35367675936614	1.08171626136101
ENSG00000140297	GCNT3	HLC	-0.752136944090992	-0.752136944090992	-0.752136944090992	-0.752136944090992	-0.752136944090992	-0.752136944090992	1.21155907330068	-0.752136944090992	-0.752136944090992	2.45492715880994	0.646437157420122	1.70417216319719
ENSG00000153823	PID1	HLC	-0.673169861888895	-0.701387439460959	-0.571893483355742	-1.51401135042516	-1.2400329454892	-1.27509007689999	0.905770170464202	0.516752663884125	-0.0358825098249702	0.998351891700006	1.97496054909769	1.61563239219889
ENSG00000172164	SNTB1	HLC	-0.496278640044125	-1.21902437270482	-0.875599756027667	-1.77368701313811	-0.999062238106979	-0.974607282161633	1.0951483578709	0.587456309781885	0.521849675050649	1.34839933331018	1.5588051747143	1.22660045145543
ENSG00000166450	PRTG	HLC	-1.02778733636761	-1.1000373595109	-1.42442671080547	-0.757794550053166	-1.15044830586951	-0.980586819602685	0.348373863230893	0.830178441388163	1.04698327641453	1.0879365313197	1.63973869839304	1.487870271463
ENSG00000128591	FLNC	HLC	-0.612705862042309	-1.46830599898479	-0.970749334730894	-0.958266649965356	-1.28855789964906	-1.0099179584648	1.80649938356939	0.785574438554405	0.45039344848058	0.815562133421222	0.866847633678839	1.58362666613277
ENSG00000138193	PLCE1	HLC	-1.64949248349833	-1.86140043738263	-1.86140043738263	-0.0355171262626981	-0.0500728943967057	0.690230866038042	-0.0885998633462726	0.757704156068268	1.24805087784676	1.00135886285888	1.05424193066008	0.794896548797247
ENSG00000116962	NID1	HLC	-0.875371515535074	-0.879527733218062	-1.35333908789918	-1.03862438749684	-1.16846407738486	-0.955188305327678	1.06661715312267	1.4994638135636	0.00921106557103712	1.64164964051779	0.894799815386843	1.15877361869977
ENSG00000106927	AMBP	HLC	-0.965855447231292	-0.641466095936725	-0.965855447231292	-0.965855447231292	-0.965855447231292	-0.965855447231292	-0.396915373478645	-0.0726632797589879	0.744726274477522	1.73231763077878	1.86936793572543	1.59391014434909
ENSG00000106804	C5	HLC	-1.25346552702034	-1.25346552702034	-1.25346552702034	-0.419036826706345	-1.25346552702034	-0.80962563581756	0.299272175982911	0.650844936659242	1.17507980033182	1.5293464409076	1.49659013323649	1.09139108348722
ENSG00000164946	FREM1	HLC	-1.60247288235302	-1.30374250770247	-1.25684287381254	0.626850319935907	0.467448202953601	0.628222555244802	-1.33398866069439	0.0448321116946087	-0.462840321391143	1.27261901948713	1.37537556852195	1.54453946811556
ENSG00000145391	SETD7	HLC	-1.68343895666604	-1.4311942026158	-1.69718453183077	-0.0661622579629624	0.0084995557785188	-0.22167438401942	-0.471017539543643	0.52796424086143	1.2863623360677	1.3386886994878	1.01788513772333	1.39127190271986
ENSG00000197565	COL4A6	HLC	-2.10020826659883	-1.84646374267169	-1.59260447825355	0.740399616136355	0.829448779269821	0.532133442651928	0.53417079746533	1.03279588403884	-0.179169118681485	0.498228391200688	0.682255036820575	0.869013658622014
ENSG00000129116	PALLD	HLC	-1.08193339075807	-1.45583721788996	-1.35405232114543	-0.387870227472656	-1.01231343741025	-0.469001776363645	1.30350759161716	0.260631295206239	-0.13417311207728	1.38848822502822	1.21680376833105	1.72575060293463
ENSG00000047648	ARHGAP6	HLC	-1.04090776452786	-0.928426367117595	-1.04672544719913	-0.58618355765986	-0.748678267781871	-1.25281571841216	1.29175204830314	-0.359623550939858	0.138687941742273	1.15682258280753	2.06914822761717	1.30694987316822
ENSG00000100979	PLTP	HLC	-0.537829678471506	-0.845322876174801	-0.995033727863467	-1.75023479474887	-0.776217880370334	-0.677142913875628	0.284397901885058	-0.219872775553865	0.694078487774995	1.68421698654377	1.31327261426194	1.82568865659271
ENSG00000163191	S100A11	HLC	-2.24990915790742	-1.66722419209909	-1.56836527420215	0.299435256837773	0.388994612036019	0.222409691635277	1.16282806960852	0.340129192725616	0.551011545360504	1.03570389207938	0.708802831636904	0.776183532288682
ENSG00000156463	SH3RF2	HLC	-1.3077636802987	-1.3077636802987	-0.761130098549463	-0.83104460972415	-1.03378527536274	-0.863923789095912	1.55709262740707	0.221316804033052	0.539283791890836	0.740830397865053	1.60787868774401	1.43900882438963
ENSG00000061455	PRDM6	HLC	-0.983062765533245	-0.983062765533245	-0.983062765533245	-0.983062765533245	-0.983062765533245	-0.983062765533245	1.67635184143592	0.0375192938941109	0.112162131833138	1.19617896387144	1.76699289472359	1.10917146744127
ENSG00000135047	CTSL	HLC	-1.23152562964701	-1.30093512284933	-0.651816082109775	-1.06188057672154	-0.58438997817905	-1.13026643173145	0.897430693177252	0.667127405544249	-0.0153450100636041	1.27542640434027	1.509649385525	1.62652494271498
ENSG00000110693	SOX6	HLC	-1.0999788254262	-1.3118867793105	-1.10579650809747	-0.477458078996504	-1.3118867793105	-0.529109387495949	0.460913794725858	0.718877234998781	0.0796168808439313	1.29637070439007	1.67992754072052	1.60041020295797
ENSG00000095739	BAMBI	HLC	-1.42570282821823	-1.66169263383762	-1.43944840338296	-0.160198674012255	-0.813066222544144	0.158646056192925	0.558485781583114	0.923755659202089	0.0441437440862891	0.952425996089752	1.07808342406632	1.78456810077472
ENSG00000136717	BIN1	HLC	-1.04993224922711	-1.30171147268105	-1.19992657593653	-0.769939981252266	-0.717757975175332	-1.26753442804002	1.31373736414141	0.985768743758164	1.07617033466062	0.518864563456314	1.17339167143513	1.23887000486067
ENSG00000114378	HYAL1	HLC	-0.651895915746791	-1.03492147567988	-1.15322055576142	-1.35931082697444	-0.656730646062389	-0.736071517251082	-0.38341169408816	0.406388131218824	1.06923450037771	1.33886225103563	1.39074483328239	1.77033291564961
ENSG00000170421	KRT8	HLC	-1.29244903994556	-1.6821390428803	-1.3802558315082	-0.558716002015323	-0.539177886063197	-0.579555189019401	1.46161926765715	0.46723494879447	1.0648172357247	1.06119820117855	0.963175054470721	1.01424828360638
ENSG00000140092	FBLN5	HLC	-1.29022258034808	-0.965833229053517	-0.743588998598852	-0.813503509773538	-1.29022258034808	-1.05130130682292	0.992948473270679	0.799840910309903	0.681490392258904	1.85424240133708	1.16924163027327	0.656908397495148
ENSG00000149451	ADAM33	HLC	-0.753702129877159	-0.965610083761462	-0.579223385460909	-0.965610083761462	-0.965610083761462	-0.965610083761462	0.0102890491248226	0.380981479759145	-0.243661855121953	1.08298399440229	1.86961329919526	2.09515988302436
ENSG00000187955	COL14A1	HLC	-0.110833430715666	-0.752600213710138	0.224264977761399	-1.30726285414343	-0.862643943762282	-0.941984814950975	-0.589324991788053	-0.427593708323404	-0.265881107588665	2.42581005733413	1.1848315355825	1.42321849430458
ENSG00000204381	LAYN	HLC	-0.119892494965387	-0.649116852712071	-0.312947583492992	-1.39730086805937	-1.65526213859028	-1.41634086506511	0.117538435446083	1.55105262152215	0.85777559654714	0.857101103534887	1.47779857391766	0.689594471917287
ENSG00000134138	MEIS2	HLC	-1.04239522173981	-1.04239522173981	-1.04239522173981	-1.04239522173981	-1.04239522173981	-1.04239522173981	0.921300795651868	0.92652704526518	0.738032325440532	1.74041674618814	1.1847050130958	0.743389404797329
ENSG00000139865	TTC6	HLC	-0.97041266248591	-0.97041266248591	-0.97041266248591	-0.712451391954999	-0.97041266248591	-0.97041266248591	2.23409843941887	-0.0772204950136062	0.507716178114278	0.595497069678332	1.48905154813545	0.815371964051226
ENSG00000157680	DGKI	HLC	-0.846839061028609	-0.734357663618345	-0.116629147843495	-0.224318314598913	-1.05874701491291	-0.614907123710128	2.80282458456541	-0.633381782254176	-0.653077034582025	0.0631866478607681	1.2892082984982	0.727037611624224
ENSG00000021826	CPS1	HLC	-0.0512408374158824	-0.642168060570604	-0.844843627352376	-0.39680162533893	-0.727092875022638	-0.607991015929566	-0.255331192766644	-1.23123032565293	-0.50928209701342	2.03582927796019	1.33173896213168	1.89841341697112
ENSG00000049192	ADAMTS6	HLC	-1.31197941326514	-0.711263456185242	-0.833040205322589	-1.04716829657489	-0.821307186237386	-1.28496609362427	1.24190190113687	0.506876647159843	0.506338362069038	1.08437011655114	1.73781588415389	0.93242174013874
ENSG00000060718	COL11A1	HLC	-0.15522430970153	-0.590516604608752	-0.515082537122129	-0.646434331933885	-1.767268088445	-1.52834681491983	0.196427928946679	0.587451816830286	0.0131594587353425	1.49979151516812	1.61254008870987	1.29350187834082
ENSG00000131018	SYNE1	HLC	-1.19016224908735	-1.42615205470675	-0.928595390452852	-0.390850697231562	-1.47656300106535	-0.573727429005229	1.45396969590347	0.908273925330851	0.917944299977759	1.1122178942402	0.597413907409796	0.996231098687015
ENSG00000172037	LAMB2	HLC	-0.983078375953687	-0.954395267785322	-0.721511517319186	-1.0667384622931	-1.03932008223736	-0.760680141053093	-0.250499171822102	0.811262372407636	0.486768196350832	1.94136826087024	1.01951175491696	1.51731243391817
ENSG00000163586	FABP1	HLC	-0.718402763876561	-0.718402763876561	-0.718402763876561	-0.718402763876561	-0.718402763876561	-0.718402763876561	-0.718402763876561	-0.119686316346542	-0.145943853784787	1.97977031413351	1.37678498083043	1.93789422230332
ENSG00000187498	COL4A1	HLC	-1.10411787687633	-1.99338941222669	-1.93127549759361	0.171594092875558	-0.206476619529387	0.254239193360454	0.615376221602621	0.911933378749375	0.687406673970598	0.540217281119248	1.06520247721638	0.989290087331775
ENSG00000163637	PRICKLE2	HLC	-0.89087970510243	-0.894117709503231	-0.415604866721718	-1.23644049302548	-1.36828901242742	-1.14445242506133	1.58475735542591	0.507400595494284	0.896074879084519	0.711942774588468	1.19083405796386	1.05877454928457
ENSG00000148848	ADAM12	HLC	-1.07896183936073	-0.75457248806616	-1.07896183936073	-0.821000568829817	-1.07896183936073	-0.152545071082584	0.884734178030948	-0.0583797799333716	-0.506502929268954	1.78379746088079	1.48400744842388	1.37734726792745
ENSG00000122042	UBL3	HLC	-1.34003078440362	-2.10124552884133	-1.56403461597643	0.0844644545271418	0.384082035762051	-0.223708518718159	1.34590906948359	0.56671049317291	0.717978937118352	0.776461479200294	0.834895236760657	0.518517741914533
ENSG00000079308	TNS1	HLC	-1.31248704787366	-0.935332736675641	-0.833547839931113	-1.04767593118342	-1.02025755112768	-0.741617609943412	0.758776051860798	1.17306723120449	0.505830727460514	0.380531378238198	1.60866571074997	1.46404761722095
ENSG00000169862	CTNND2	HLC	-0.735289188512063	0.000616071195750578	-0.191341532278837	-1.24864651599681	-0.742262914161063	-1.67635740322394	1.12937767661731	-0.474559158108494	-0.13485112956877	1.02322930447283	1.76998468535352	1.28010010421056
ENSG00000178209	PLEC	HLC	-1.02892964100555	-1.8942580698819	-1.14100577986694	0.0760961915712945	-0.588487636962545	-0.225613037184907	0.17609427200494	0.640268015350307	0.257028560577699	0.299491632963719	1.76464491649886	1.66467057593502
RP11-123O10.4	NA	HLC	-0.536786748997379	-0.581998747136439	-0.783681871253841	-1.62430820931724	-1.11792460748149	-0.804947168959681	1.30825436377921	0.406521862892919	0.0478546671628806	0.719536729811149	1.72134059164455	1.24613913785536
C9;DAB2	NA	HLC	-0.882591543424784	-1.11858134904418	-0.896337118589511	-0.608542000024745	-1.44297070033874	-0.999130809135961	1.10159706637656	1.21584463099342	0.467755670556262	1.16528678336183	1.21657228361945	0.781097085650395
ENSG00000112773	FAM46A	HLC	-1.04659812405467	-1.11884814719796	-0.28718897085118	-0.966518427917983	-1.16925909355657	-0.999397607289746	1.51431803382832	1.04972260483732	0.116608506392156	0.302115853658781	1.39198588446419	1.21305948768735
ENSG00000164120	HPGD	HLC	-0.697824836663271	-1.07172866379516	-0.718673061808072	-0.539957172366377	-0.628204883315451	-1.21695103767471	-0.684891795991204	0.429272561780499	2.07676066606611	1.03738214913258	0.687164384533621	1.32765169010143
ENSG00000113594	LIFR	HLC	-1.34178099337047	-1.76663531143496	-1.66879210624537	0.0783592192245735	-0.152500370540931	0.173888104304761	1.31713130334013	0.400703228501921	0.0927193191939413	0.705248143414767	0.95246583411467	1.20919362949697
ENSG00000273686	B2M	HLC	-0.969599413525391	-0.809148137666688	-1.42643052365588	-0.719205566920057	-0.740043141862222	-1.07629876299345	1.28949307729486	0.847342762683411	0.895061642435488	1.62910944069899	0.210349806067271	0.869368817443664
ENSG00000135333	EPHA7	HLC	-1.01190306994136	-0.983219961772991	-1.57228222685532	-0.451448470344204	-0.539696181293277	-0.645865458577171	0.200518347181045	0.332028236824271	0.208145320325024	1.57218275482985	1.80752595029955	1.08401475932456
ENSG00000181234	TMEM132C	HLC	-0.635713277409754	-0.847621231294057	-0.461234532993504	-0.589659960763146	-0.847621231294057	-0.847621231294057	0.705116471709198	-0.422255998635321	-0.847621231294057	1.56201706992564	1.98760215166266	1.24461300168046
ENSG00000112715	VEGFA	HLC	-1.83056148035932	-1.63813858971486	-1.07115232715583	-0.0495449991801413	-0.107445882841086	0.530573040584413	0.192580666092177	0.682636789537096	-0.0866212748711988	0.47097222321289	1.36325260358613	1.54344923110973
ENSG00000183255	PTTG1IP	HLC	-1.11654392901654	-1.02670269394471	-1.11718825344788	-1.09584288636019	-0.610369812765243	-0.944783270836434	1.19435748001486	0.738882990259754	0.473779538292399	1.18209067032151	1.25206244684269	1.07025772063978
ENSG00000164938	TP53INP1	HLC	-0.92499162608506	-1.87797421926339	-1.14931865078982	-0.376480259438021	0.0499540988005664	-0.386157421147535	0.0808074830608074	-0.0553420799228315	0.390490795268757	1.6388408271777	1.17744460659691	1.43272644574191
ENSG00000169902	TPST1	HLC	-1.09314807187412	-1.09638607627492	-1.11708903246982	-0.52921233564767	-0.745947994499563	-0.985736454112054	1.00511482758183	0.762690610280578	0.155407767240991	1.16025014788934	1.8448971897281	0.639159422157304
ENSG00000233588	CYP51A1P2	HLC	-0.090348944417797	-0.176673966606392	-0.368631570080979	-0.732878005781501	-1.58843126392096	-0.805167608552138	-0.319768140514891	-0.480228206298507	-0.181842343656245	1.86244141498147	1.04049199795668	1.84103663689126
UBD;GABBR1	NA	HLC	-0.674855696571363	-0.674855696571363	-0.674855696571363	-0.674855696571363	-0.674855696571363	-0.674855696571363	-0.674855696571363	-0.249490463912627	0.0470925320681457	1.8375075455538	0.93182862991702	2.1570516323732
ENSG00000131069	ACSS2	HLC	-0.825243020816883	-1.06123282643628	-0.69477501590399	-0.908903107156296	-0.881484727100552	-0.328581176223458	-0.816682103978196	0.645141836578441	0.394805369449497	1.12674106439432	1.60619214230018	1.74402156489321
ENSG00000071282	LMCD1	HLC	-0.807847288794605	-0.999690448846958	-1.23432406561379	0.120970759358423	-0.757927792274326	-0.360235783272782	2.44930970952397	-0.207519665678216	-0.46586021097439	0.968023049001965	0.483101051274991	0.812000686295714
XXBAC-BPG116M5.17;CFB	NA	HLC	-0.797959002793025	-0.797959002793025	-0.797959002793025	-0.797959002793025	-0.797959002793025	-0.797959002793025	0.177940130093259	-0.199242555263007	0.0594327618015713	1.90021407521705	1.86158398116517	0.987825623744111
ENSG00000173898	SPTBN2	HLC	-1.20454613628569	-0.905815761635137	-0.969843180443928	-0.254931792013714	-0.738945284925299	-0.85492004600596	0.63260671920196	0.118802966795939	0.0597519250936442	0.497677253706347	1.5234612495656	2.09670208694624
ENSG00000138760	SCARB2	HLC	-1.46677606823022	-1.13724781161499	-1.02189920209201	-0.687923463858077	-0.879399675445042	-0.636361360763548	1.09911933238676	0.80495377054226	0.852584617179509	1.17022616015808	0.898158934554043	1.00456476718323
ENSG00000134109	EDEM1	HLC	-1.24472798981229	-1.31697801295559	-1.09473378250092	-0.281676655480403	-0.7643689494758	-0.35396625825104	0.322328653141521	-0.0290268559974098	0.601721434509781	0.966890119450422	1.35044695578087	1.84409134159086
ENSG00000146373	RNF217	HLC	-0.401967479685228	-1.04054422060488	-0.422815704830029	-1.36493357189945	-0.332347526337408	-0.921093680696662	1.76186306964047	-0.227303155548512	-0.269708674533063	0.539992808096718	0.983021741511664	1.69583639488638
ENSG00000171345	KRT19	HLC	-1.10637024746831	-1.22472289361364	-0.991839143147502	-0.568585326689969	-0.936786743921609	-0.756744157188579	0.318473564743196	1.22204301169578	0.525009878536457	0.88438791931411	1.31927555381197	1.31585858392809
ENSG00000183963	SMTN	HLC	-0.455716864179832	-1.16313177540749	-0.616498193658253	-1.16313177540749	-1.16313177540749	-0.539892465684123	1.25664974548187	1.1915881298678	-0.181928034986676	1.0161099539972	0.235442326103628	1.58364072928084
ENSG00000170004	CHD3	HLC	-1.45234768172896	-1.68833748734835	-1.0706089715735	0.226049692193703	-0.11789414064124	0.132001202682195	0.11953188479624	0.389560225029756	-0.375545223296747	0.997750261237769	1.47624506087993	1.36359517776921
ENSG00000172594	SMPDL3A	HLC	-0.958260071711693	-0.845778674301429	-0.623534443846763	-0.912206755065085	-1.170168025596	-1.170168025596	0.962090697843164	0.666500737997381	0.467013589750177	1.00907370380869	1.28929618502536	1.28614108169219
C10ORF11	NA	HLC	-1.1861960735455	-0.861806722250937	-1.1861960735455	-0.928234803014594	-0.912217668609544	-0.562956763822142	0.777499943846171	0.718114390134082	0.724530297349502	0.862398004618244	1.64902730941121	0.906038159429013
ENSG00000149972	CNTN5	HLC	-0.500970009140611	-0.897609383578473	-0.691519112365444	-0.420890313003926	-0.623630978642512	-0.658688110053304	-0.328669309825826	-0.66930635045347	-0.0402176189838759	1.40142500772194	2.23545132892946	1.19462484939604
ENSG00000176171	BNIP3	HLC	-1.2987408430267	-1.85911999994066	-1.47273330164011	0.117909075207006	0.827397781874847	0.285608041384455	-0.306382296937405	0.495599905334624	1.07755205370674	0.923691967987284	0.976103383016059	0.233114233033858
ENSG00000100652	SLC10A1	HLC	-0.864229809557302	-0.864229809557302	-0.864229809557302	-0.606268539026391	-0.864229809557302	-0.864229809557302	-0.295289735804655	0.156352249870054	1.42750558910663	1.74402767414327	1.3628704252783	0.531951384219294
ENSG00000150593	PDCD4	HLC	-1.055313431537	-0.609547302572749	-1.06905900670172	-0.781263888136957	-0.913112407538901	-0.992453278727594	0.157107985585405	1.04312274288121	0.470764949890793	0.793945712768736	1.37612173158007	1.57968619250871
ENSG00000105854	PON2	HLC	-0.372596945627629	-1.74119158951623	-0.585143061874878	-0.756464829100037	-1.03861140860417	-0.564377612520144	-0.188453886512973	0.956270643446231	1.52254216843742	0.668446711703464	1.00886407074061	1.09071573942833
ENSG00000094755	GABRP	HLC	-1.15633554424454	-1.04385414683428	-1.36824349812884	0.375681726334654	-0.864106047498554	-0.58546610631429	-0.075285137083299	0.322813026368752	0.342338223579969	1.04139480309085	1.54739886991387	1.46366383081572
ENSG00000163947	ARHGEF3	HLC	-0.780482039759951	-0.493223169484745	-1.01835366092758	-0.715271695991003	-1.08347311322264	-1.33723221827364	1.24403957390779	0.487864285659794	0.331263870666931	0.647785955703579	1.30123172330634	1.41585048841513
ENSG00000234456	MAGI2-AS3	HLC	-0.808639773011655	-0.808639773011655	-0.808639773011655	-0.808639773011655	-0.808639773011655	-0.808639773011655	0.7440979299916	0.328990643339278	-0.402969792680768	0.936713579139655	1.14134906902335	2.10365720925682
ENSG00000123191	ATP7B	HLC	-0.914712939533969	-0.986962962677264	-0.924965615671278	-0.644720153219529	-1.31135231397183	-0.384935545693687	-0.018393952926286	0.525316449621545	1.02744272326059	0.593574066024332	1.60429005407088	1.4354201907165
ENSG00000070019	GUCY2C	HLC	-0.48927888881374	-0.323975091471797	-0.943733679049451	-0.853401306775458	-1.05614197241404	-0.88628048614722	0.442680196686357	-0.192489960999071	-0.234895479983621	1.60838760387194	1.80294033515793	1.12618872993818
ENSG00000115221	ITGB6	HLC	-0.928583484830065	-0.928583484830065	-0.928583484830065	-0.928583484830065	-0.928583484830065	-0.928583484830065	1.03511253256161	0.600496999501683	0.46292017532437	0.637326247334178	1.41937182858104	1.4162731256775
ENSG00000116729	WLS	HLC	-1.16860620331229	-1.40459600893168	-1.72898536022625	-0.164423323011428	-0.100736331216366	0.528721937553069	0.690796160663112	0.418036130408876	-0.25085651962606	1.28149173965444	1.40407535228169	0.495082425762891
ENSG00000120156	TEK	HLC	-0.121667463193004	0.182183506008388	0.118480327863224	-1.47574997140556	-1.22957379130618	-1.73371124193647	0.925703365032693	1.20867046613606	-0.255582401336283	0.874546241764105	1.01634441832036	0.490356544052668
ENSG00000120885	CLU	HLC	-0.563958667016821	-0.686760452483869	-0.329491370915085	-1.16326996489196	-1.08860815115048	-1.45275765585977	1.03902541268658	0.651542691347926	0.562331344391147	1.0779839457734	0.389503953086217	1.56445891503272
ENSG00000118503	TNFAIP3	HLC	-1.16510351661806	-0.840714165323495	-1.16510351661806	-0.330674816304063	-1.16510351661806	-0.541864206894699	0.127854844427483	1.4131662722157	0.313025323982127	1.24453478460163	1.18285179679305	0.927130716356455
ENSG00000115461	IGFBP5	HLC	-1.44008381608781	-1.51233383923111	-1.29008960877644	0.210327629601825	-0.025395647539749	0.474320296581546	-0.0639226164893159	-0.396003671885061	0.634686796694326	0.7715342931749	1.48524075550366	1.15171942845324
ENSG00000162733	DDR2	HLC	-0.887815450976149	-0.887815450976149	-0.887815450976149	-0.629854180445238	-0.613837046040189	-0.64889417745098	1.97704085672961	-0.28909900344613	-0.165867222336641	0.857537901175161	1.46013986243496	0.716279362307891
ENSG00000183775	KCTD16	HLC	-0.985917607296647	-0.985917607296647	-0.779827336083619	-0.727956336765736	-0.711939202360687	-0.746996333771478	2.05873874606978	0.151712809054287	0.109307290069736	0.759435744854664	1.24118262753896	0.618177205987394
ENSG00000103196	CRISPLD2	HLC	-0.508031184141656	-0.092046647615319	-0.904670558579519	-0.238038397827216	-0.904670558579519	-0.66574928505435	0.0712285743067658	-0.479305325920782	-0.904670558579519	1.14392351958423	1.55479365204184	1.92723677036504
ENSG00000007237	GAS7	HLC	-0.607779131452337	-1.24635587237199	-0.748799208118094	-0.211054514896804	-1.29676681873059	-0.787967831852001	1.29411108403921	0.333565240013031	-0.0108992187818693	0.477848854497194	1.62807013663248	1.17602728102177
ENSG00000096696	DSP	HLC	-1.60683118659265	-1.75757519790779	-1.20279477017777	0.0254963946179538	-0.178061702031216	0.218437302319153	0.694276413632248	0.875975464443408	0.502020701099653	0.444717517004269	1.05203532108732	0.932303742505435
CTC-321K16.1	NA	HLC	-0.778612723781325	-0.990520677665628	-0.7844304064526	-0.990520677665628	-0.990520677665628	-0.546680786462844	1.14173804577353	0.53855980666612	0.210370201071378	1.79229129026232	0.164779497596792	1.23354710832351
MANBA;LRRC37A15P	NA	HLC	-1.51396983644291	-1.5862198595862	-0.568294655783486	-0.166683986417274	-0.492095070471894	-0.853568209373387	0.855180057405542	0.53772660277602	0.931238167825389	0.697648272819805	1.08120510915025	1.07783340809815
ENSG00000121440	PDZRN3	HLC	-1.12877824830413	-0.488164751725422	-0.842108565574969	-0.932810854977905	-1.19639227875863	-0.352644850867612	0.367483415513036	0.237727921714076	0.13379269583334	1.17661854468732	1.55102755636458	1.47424941609632
ENSG00000182752	PAPPA	HLC	-1.03077216364177	-1.03077216364177	-1.03077216364177	-0.554053093067219	-0.756793758705805	-1.03077216364177	0.742028410394595	1.27475861453676	0.749655383538574	0.874154216354398	0.367801937869348	1.42553694364642
ENSG00000178573	MAF	HLC	-0.972280788304614	-0.647891437010047	-0.972280788304614	-0.972280788304614	-0.972280788304614	-0.733359514779445	1.31089026531415	-0.0790886208323101	0.587565216580072	1.07631328985913	1.12290695640238	1.25178699768453
ENSG00000124788	ATXN1	HLC	-1.22058746291779	-1.33894010906312	-1.38136879239621	-0.270973118645814	-0.627021760711344	-0.187537036476653	0.936853933560318	0.843779980295989	0.456365618127574	0.251239355259241	1.27081298615359	1.26737640681422
ENSG00000120910	PPP3CC	HLC	-1.25029331282988	-0.873139001631858	-1.46220126671418	-0.477474506297992	-0.759621085802127	-0.405160265206798	0.310599307322178	1.48018044135835	0.730543192114665	0.947437034505509	0.997262943907176	0.761866519274957
ENSG00000138434	SSFA2	HLC	-0.962778093241577	-0.770355202597115	-0.973030769378886	-0.882698397104893	-0.855280017049149	-0.915577576476656	1.76737917386048	0.544892996000147	0.67080826153904	0.68917661048431	0.590571374355561	1.09689163960874
ENSG00000281289	LSS	HLC	-0.372367969822432	-0.564211129874785	-0.0856982870932725	-0.756235853294839	-0.439982000276929	-0.814545845432886	-1.74096261371103	0.163347849968556	0.643405378561989	1.33806335583018	1.457852746588	1.17133436855744
ENSG00000111799	COL12A1	HLC	-0.602152952290438	-0.674402975433733	-0.792702055515272	-0.9987923267283	-0.9987923267283	-0.9987923267283	0.294166034317245	0.692264197769296	-0.0175885863074901	1.41084597449139	1.46067188389306	1.22527545926084
ENSG00000173068	BNC2	HLC	0.31351167536969	-0.579137155261403	0.0106252822357327	-1.03557235627006	-1.51826465026546	-0.819365358431169	0.649393288326613	-0.704206540542215	-0.202518606210963	1.36475606199223	1.3789619161719	1.14181644288509
ENSG00000064225	ST3GAL6	HLC	-1.19878926377833	-0.874399912483767	-0.992698992565306	-0.532157103026032	-0.496209082866279	-1.19878926377833	0.353948439224921	0.891274226879654	0.831436465440145	0.70613711621783	1.36418002400627	1.14606734672923
ENSG00000172638	EFEMP2	HLC	-1.00837829434171	-1.00837829434171	-1.00837829434171	-1.00837829434171	-0.305798113429657	-0.564538403138929	0.544359408661542	0.520702189990036	0.838669177847819	0.55753143782253	0.390195807169401	2.05239167244411
ENSG00000117298	ECE1	HLC	-0.43578483876634	-0.464002416338404	-1.07053605608958	-1.2766263273026	-0.574046146390549	-0.83278643609982	-0.30072719441632	0.33571418095014	0.570421144886928	1.42154675070747	1.55859705565411	1.06823028320496
ENSG00000148053	NTRK2	HLC	-0.840636996476521	-0.840636996476521	-0.840636996476521	-0.840636996476521	-0.840636996476521	-0.840636996476521	-0.271696922723875	1.56165006719615	0.796544618869651	1.06428938351964	0.947887201936939	0.945147630060615
ENSG00000130203	APOE	HLC	-0.77073764131652	-1.28718977855822	-0.920731968025932	-0.626852369436594	-1.33760072491682	-0.32417802385367	0.67159192376598	0.836756683804007	0.941918828866881	0.900784112272381	0.61552110498282	1.30071785241569
ENSG00000198420	TCAF1	HLC	-1.1814432019576	-1.54880877923044	-0.934290181997382	-0.0640199981530181	-1.1884169276066	0.233850977235179	0.596122842126201	0.446121629510984	1.06363965118686	0.501326610046871	0.900270561108691	1.17564681773026
RP11-444D3.1	NA	HLC	-0.467194664849661	-0.73842132344435	-1.358179911022	-0.910137909008558	-1.0419864284105	-0.354455036865334	1.12028969838321	0.0211323488707116	0.285659119895922	0.863690874378019	1.57739733670678	1.00220589536577
ENSG00000172893	DHCR7	HLC	-0.75933770994884	-1.17560125044207	-0.414681462460909	-0.739414948333896	-1.46983384636628	-0.68613901885033	0.77245831837724	0.739830350618256	0.571267549566352	1.11716951807772	0.792572688124617	1.25170981163815
ENSG00000083444	PLOD1	HLC	-0.95799018892756	-1.68073592158825	-0.986101333736753	-0.589925171932021	0.145510897568288	-0.605191667903215	0.166054774416713	1.10888965326249	0.246989062989472	0.773699771060665	1.23706994104277	1.14173018374742
ENSG00000197702	PARVA	HLC	-0.710831305558704	-0.835922696509707	-1.22310413244796	-1.33079329920338	-0.19145422234189	-0.775110427060153	1.31402144613598	0.453882593933526	0.347815735620042	0.913803970023839	0.826592320513648	1.21110001689475
ENSG00000001626	CFTR	HLC	-0.989594546229966	-0.989594546229966	-0.603207847929414	-0.731633275699056	-0.715616141294006	-0.989594546229966	0.303363814815579	0.35699701729064	1.39477344604305	0.371338872579869	1.23750568860564	1.3552620642776
ENSG00000182168	UNC5C	HLC	-0.670028711639228	-0.742278734782523	-1.06666808607709	-0.400035925324788	-1.06666808607709	-1.06666808607709	1.35311343481227	0.462412398254658	0.324835574077344	0.838258293919073	1.49630120170752	0.53742672720695
ENSG00000169213	RAB3B	HLC	-0.465206557291063	0.181693695129567	-0.237772340656004	-0.0362235632076038	-0.622864766007516	-0.0653168548129957	-0.597316628615867	-1.72468909896039	-0.512872716272949	1.1746051109472	1.28536796545982	1.62059575428779
ENSG00000090776	EFNB1	HLC	-1.11174264856139	-1.11174264856139	-0.565109066812156	-0.853781378030478	-0.409162467649334	-0.667902757358605	1.54767195840778	1.14286250363224	-0.130538908140579	0.249190770248447	1.23621266484972	0.674041977975747
ENSG00000138639	ARHGAP24	HLC	-1.56077815704802	-1.14479362052169	-1.26657036965903	0.502831467207275	-0.78440176889784	0.549199274008632	1.2470935704189	0.011504735519102	0.129040006855864	0.825394436442058	0.702125452472309	0.789354973202443
ENSG00000168944	CEP120	HLC	-1.17336280794313	-0.94602999148833	-1.45976821267627	-0.429321659953016	-0.474798818166408	-0.498858809355699	1.3709539354377	0.321061097345235	0.63837149058349	0.935008908539791	0.742686365373042	0.97405850230359
ENSG00000106034	CPED1	HLC	-0.905245498003439	-0.580856146708872	-0.905245498003439	-0.905245498003439	-0.905245498003439	-0.905245498003439	0.867555076032922	0.86045346018983	0.189979399362944	1.60711774412173	0.701438828484944	0.880539128533698
ENSG00000183783	KCTD8	HLC	0.348353888610438	0.303141890471379	-0.463681865392305	-0.73916757170942	-1.40579973246172	-1.16687845893655	2.13466565056885	-0.0592081689411157	-0.310574835095339	0.339553619689589	0.821300502373882	0.198295080822319
ENSG00000005108	THSD7A	HLC	-0.527953288064646	-0.910978847997732	-1.02927792807927	-0.568736038539997	-0.731230748662008	-0.452590807477745	1.04780285432647	-0.214786139864943	-0.51341997065279	1.27699504283287	1.51468746096454	1.10948841121527
ENSG00000159348	CYB5R1	HLC	-0.534853691094142	-1.26891936965376	-1.09803408727998	-0.980714818079436	-0.500791513586787	-0.726496206700387	0.201115935532294	1.07056894884107	1.1342473678233	1.0309145408725	0.77027293843624	0.902689954889087
ENSG00000113580	NR3C1	HLC	-0.853778837575101	-1.08976864319449	-1.02777129618851	-0.579729294175062	-0.910020543858771	-0.631380602674507	0.869013059129703	0.276898530008534	0.496568376405945	1.0982052476361	1.42106538846766	0.930698616018503
ENSG00000138829	FBN2	HLC	-1.2792690497119	-1.24051918376071	-1.61343298658615	0.420763786030505	-0.016464432946365	0.370526357274862	1.49833665908207	-0.0276521297223642	-0.0494536383643238	0.380276283213034	0.746267555648521	0.810620779842821
ENSG00000100564	PIGH	HLC	-0.612674365421247	-1.09916687941944	-1.30184244620121	-0.567395387990655	-0.161039578890161	-1.24438925329898	0.594941909116997	0.714057919170909	0.904625221324947	1.00994393350831	0.538871090333838	1.22406783776671
ENSG00000151491	EPS8	HLC	-1.19647861889403	-0.586972707453682	-0.902270831505037	0.0639112621677418	-0.890537812419834	-0.536076991824505	0.370578024059787	-0.152398474691274	-0.293774976246216	1.34538998789005	1.24210538962483	1.53652574929216
ENSG00000141756	FKBP10	HLC	-0.834503424373875	-1.32099593837207	-0.186121058984122	-0.253028947954764	-1.63607979851843	-0.519946630997171	0.74935640351477	0.966484278067147	0.33303059530554	0.698199280246182	1.08175611657663	0.921849125490166
ENSG00000124749	COL21A1	HLC	-1.06795984668206	-0.743570495387491	-0.377112684855205	-0.591240776107512	-1.06795984668206	-0.0109188451746736	1.88959568563879	0.46112063764969	-0.346011618042549	1.34167845453763	-0.205445444749644	0.717824779855079
ENSG00000171843	MLLT3	HLC	-1.2134281089683	-0.280768180398495	-0.788121467857704	-0.625340722989974	-0.437051720818119	-1.371146209881	1.15572178488015	0.155631474787104	0.681667915257764	0.294858896589999	1.38174683662486	1.04622950277372
ENSG00000138696	BMPR1B	HLC	-0.506424131158166	-0.477741022989801	-0.520169706322892	-1.06680328807213	-1.06680328807213	-0.622963396869342	1.89075224424872	0.37391623056849	-0.209411523477529	0.838123091924038	1.28115202533898	0.0863727648817503
ENSG00000120158	RCL1	HLC	0.263589863891866	-0.0267716231289437	0.405516343953691	0.0371072203860092	-0.917341854201566	-0.332520929114507	-0.326963674068077	-1.39161900198862	-1.21425205478273	1.58714206778731	0.47526570959337	1.4408479316722
ENSG00000172985	SH3RF3	HLC	-0.615923270662145	-1.01256264510001	-0.806472373886979	-0.53584357452546	-0.738584240164046	-0.229785253285453	-0.44362257134736	0.428156873540609	0.378941015054428	0.109371017673674	1.64698033885819	1.81934468384455
ENSG00000273814	OCLN	HLC	-1.34472913024431	-1.37294670781638	-0.933385067457708	-0.621008581565754	0.188147612172201	-0.609672912171934	0.580218649505738	0.788637195491206	0.896483178816745	1.24781708921993	0.806243701250449	0.374194972799807
ENSG00000269821	KCNQ1OT1	HLC	-0.301761159228228	-1.37078773683832	-1.11692847242018	-0.956161815382492	-0.651479885869489	-0.555358998520876	0.648320034743457	1.17927538471393	0.611613505489645	0.679960577133203	1.2751468709009	0.558161695278452
ENSG00000075651	PLD1	HLC	-0.814769445264504	-0.70228804785424	-1.02667739914881	-0.768716128617896	-0.752698994212847	-0.582837507946024	0.266280961896738	0.414042119491808	-0.0454736587279974	1.38296090207088	1.43278681147255	1.19739038684033
ENSG00000168785	TSPAN5	HLC	-0.585587639836686	-0.863226849959113	-0.612835825598096	-0.574218393009565	-1.00739228823332	-0.553985132685499	1.77279705558574	-0.203309570201982	-0.259550786615018	0.898529647426584	1.28198561223398	0.70679417089297
ENSG00000143643	TTC13	HLC	-0.618605279169217	-0.690855302312511	-0.809154382394051	-1.01524465360708	-0.741266248671118	-0.571404762404295	-0.0393455207207944	0.122385762743855	0.544601351277607	1.68292842440299	0.591439672881304	1.5445209379733
ENSG00000115594	IL1R1	HLC	-0.790117920094729	-0.465728568800162	-0.790117920094729	-0.532156649563818	-0.790117920094729	-0.55119664656956	0.185781212791555	-0.364752687435993	-0.217659010002955	1.72224532203044	1.15987092194027	1.43394986589441
ENSG00000151655	ITIH2	HLC	-0.602592213959285	-0.602592213959285	-0.602592213959285	-0.602592213959285	-0.602592213959285	-0.602592213959285	-0.602592213959285	-0.374289180834283	0.254799550635311	1.80704608726041	1.34739662807571	1.18319241257785
ENSG00000113721	PDGFRB	HLC	-0.0733105465148647	-0.589762683756561	-0.914152035051129	-0.656190764520218	-0.914152035051129	-0.914152035051129	0.378806325994416	0.331738915728008	-0.508482054720242	0.990774344945035	1.83590362520571	1.0329789427921
ENSG00000162434	JAK1	HLC	-0.702504116378019	-0.398653147176626	-0.887405386924224	-1.06934806311549	-0.686298866111604	-1.02714678912237	1.54702370435684	0.595289749212792	-0.0228124964575578	0.95251170849163	0.818512817386448	0.880830885838181
ENSG00000136205	TNS3	HLC	-0.321780232740253	-1.25285775484576	-0.400343009257794	-0.743077038210351	-0.997415682809533	-0.979640775689223	-0.0606915063888511	0.980548339570276	0.963780550881588	1.08107664449938	1.25512779738887	0.475272667601652
ENSG00000087245	MMP2	HLC	-0.779966649445747	-1.63556678638823	-0.0476741467196757	-0.494196196897	-0.927370092120755	-0.672555031683679	0.459825383206567	0.39476376759249	0.378838899549627	1.4200914792964	1.03185818234823	0.871951191261767
ENSG00000114480	GBE1	HLC	-0.670303367791687	-1.03766894506453	-1.02834684048027	-0.285730818813912	-0.12760242548025	-1.40645296482595	0.809121750940432	0.0540176076508536	0.662744879108685	0.662070386096432	1.4716710900006	0.896479648659596
ENSG00000070961	ATP2B1	HLC	-0.662264153345527	-1.01142361175695	-1.13720666726424	-0.606534466278531	-0.909037691704121	-0.518041904227923	1.32139168203547	0.087189085015579	0.591335310645587	0.713022473310461	1.21684516196038	0.914724781609819
ENSG00000011028	MRC2	HLC	-0.97309464940358	-1.53347380631754	-1.14708710801699	-0.173783097547789	-0.500887760755502	-0.246072700318425	0.886307714571821	0.556589684340448	0.103707809028633	0.978889435807625	1.12606917764065	0.922835300970641
ENSG00000052795	FNIP2	HLC	-0.848957626819217	-0.820274518650852	-0.157151232410309	-0.93261771315863	-1.13535837879722	-0.626559391918623	0.722921939705983	0.281719740764419	-0.109993766647504	1.52917119748877	1.05012742688818	1.046972323555
ENSG00000113161	HMGCR	HLC	-0.0206976962711884	0.0233354473097416	0.227916047512426	-1.68825985026525	-1.15773074737793	-1.14296577530276	0.563482125547953	0.35536534716341	0.035497773715325	1.46499206250496	0.471440688487649	0.86762457697566
ENSG00000177606	JUN	HLC	-1.00882679593582	-0.907630091180097	-0.928333047374992	-0.340456350552844	-0.557192009404736	-0.343916237347549	1.57124497374904	1.14848706381697	-0.606252734416153	0.926095524864347	0.142718659819263	0.904061043962575
ENSG00000184005	ST6GALNAC3	HLC	-0.137710195683521	0.0416256283619152	-0.086187004830367	-1.24687552009992	-1.07356121169703	-1.10196377964869	0.923232575225656	-0.186544573927384	-0.520362379498922	1.04241750847549	1.4060821966271	0.939846756695669
ENSG00000135766	EGLN1	HLC	-0.824689964639872	-1.22132933907773	-1.01523906786471	-0.236602578661544	0.197184801331143	-0.598090029354372	0.551471234958627	-0.200747279650378	0.338516665806952	-0.099395676304054	1.77048498095329	1.33843625250265
ENSG00000175416	CLTB	HLC	-1.2584103965696	-0.861246034845768	-1.6182686239902	0.303839658354134	0.69942014066241	0.344456658163296	0.0871013570077732	-0.515734270037789	-0.0954729434840766	0.562933532687437	1.14182678640101	1.20955413565137
ENSG00000162692	VCAM1	HLC	-0.778460866214523	-0.778460866214523	-0.778460866214523	-0.520499595683612	-0.504482461278562	-0.778460866214523	-0.778460866214523	0.467430084564614	0.932120855494291	1.52057352508589	1.17152797582048	0.825633947069518
ENSG00000197142	ACSL5	HLC	-0.631842910849551	-0.843750864733853	-0.843750864733853	-0.843750864733853	-0.843750864733853	-0.843750864733853	0.708986838269401	0.176831194693503	0.455592152351819	0.901602487417457	1.50420444867726	1.10338011310938
ENSG00000079385	CEACAM1	HLC	-0.457762186132988	-0.669670140017291	-0.463579868804262	-0.669670140017291	-0.669670140017291	-0.430748866492122	-0.669670140017291	-0.441367106892288	0.187721624577306	1.37892393814646	1.11885405839617	1.78663896727089
ITIH4;RP5-966M1.6	NA	HLC	-0.877337515999237	-0.877337515999237	-0.877337515999237	-0.877337515999237	-0.603359111063277	-0.877337515999237	0.415620845046308	0.563382002641378	0.903090031181103	0.688572216165006	1.07265132603576	1.3467302699899
ENSG00000116774	OLFML3	HLC	-1.03097735113129	-1.18131953238131	-0.83789491570416	-0.429381406130689	-0.692962829911409	-0.177737293935089	0.138315280093649	-0.157274679752134	0.8148582169538	1.33071599922081	0.841279939611208	1.38237857306662
ENSG00000120690	ELF1	HLC	-0.983708679722946	-1.14471188881043	-0.88567073099541	-0.911978989675171	-0.689255146818605	-0.18623099737443	1.42564979526468	0.441400657681966	0.708853212698946	1.06332045706229	0.641945876359764	0.520386434329336
ENSG00000184258	CDR1	HLC	-0.352369991097403	-1.10353541888336	-0.881291188428689	-0.443198009761732	-0.923787319547632	-1.18900349665275	0.855246283440842	0.719096720457203	0.41912270201161	0.751316959226764	0.920030543233187	1.22837221600196
ENSG00000113361	CDH6	HLC	-0.950830463607501	-0.838349066197236	-0.956648146278775	-0.496106256739501	-0.658600966861513	-0.71889852628902	1.3818293492235	-0.269546250019499	1.08035038126813	1.01650331191288	0.787250424543197	0.623046209045333
ENSG00000143162	CREG1	HLC	-0.230528902468492	-0.493459770584812	-0.615236519722159	-1.0481224110181	-1.03210527661305	-1.06716240802384	0.466716892487349	0.459615276644257	0.404498040159802	1.70439341833168	1.15338052907235	0.298011131735028
ENSG00000145681	HAPLN1	HLC	-0.701364017724808	-0.449119263674568	-1.05565290342574	-1.00378190410786	-0.987764769702808	-0.817903283435984	0.701952842752908	0.642567289040819	0.585304297550764	1.03729121666164	0.965357060196836	1.0831134358688
ENSG00000143153	ATP1B1	HLC	-1.0259819287463	-0.690071933446318	-1.17597625545571	-0.507132708512811	-0.339633851670957	-0.809782415775178	1.548484510049	0.581512396374229	0.219634121059187	1.27764156440261	0.228364327424429	0.69294217429782
ENSG00000015153	YAF2	HLC	-1.48783878306376	-1.16344943176919	-1.28174851185073	-0.128148074294011	-0.186858169629661	0.534304946496822	-0.194880422018217	0.817691995114764	1.0656591756559	0.560755295099987	0.860116530347347	0.604395449910756
ENSG00000149485	FADS1	HLC	0.0643247062430783	-0.379686443084597	-0.222083982601202	-0.924513320913284	-0.684042158123085	-0.81991897295333	-0.908033164889781	-0.138756259605479	0.0993830510287452	1.5399760408785	0.663123810082264	1.71022669393816
ENSG00000112818	MEP1A	HLC	-0.544600673185742	-0.756508627070045	-0.756508627070045	-0.756508627070045	-0.756508627070045	-0.756508627070045	0.536449733975501	0.489382323709092	-0.350838646739157	1.54252576423037	0.642065474441069	1.46755915891909
ENSG00000215105	TTC3P1	HLC	-1.10241035017281	-1.29425351022516	-1.52888712699199	0.181198732289867	-0.0402141678930432	-0.213297696282089	1.18462155470398	0.264095819845396	0.233859714506101	1.06348786652	0.593160415137103	0.658638748562645
ENSG00000135506	OS9	HLC	-1.3073735662188	-0.822566397666558	-1.26415301834451	-0.680640814125642	-0.232899563146757	-0.123727654084556	0.0381381873585811	1.22064575008316	0.438706370562901	1.07161683704621	0.854807636249451	0.807446232286519
ENSG00000159216	RUNX1	HLC	-0.997345754784837	-0.528009182176246	-0.651715746244357	-0.7200339055963	-0.672174620450452	-0.778343897734346	0.427498057426669	0.131908097580886	0.381696872329259	0.474481063392196	1.98050269609014	0.95153632016739
ENSG00000135124	P2RX4	HLC	-0.609660555623006	-1.00629993006087	-0.80020965884784	-0.529580859486321	-0.303719749148812	-0.562460038858084	-1.00629993006087	0.684756594436728	0.840747542128664	1.29273446123954	0.782224268352592	1.21776785592827
ENSG00000167766	ZNF83	HLC	-0.770766092378847	-2.05842051982775	-0.875551372306616	-0.144033340285692	-0.263054899166217	0.485846879387236	0.482046436583448	0.559571836950218	0.805844062514259	0.0268284300973773	0.81600548917672	0.935683089255863
ENSG00000115295	CLIP4	HLC	-1.00585045921145	-1.00585045921145	-1.00585045921145	-0.339218298459144	-0.303270278299391	-0.382611149488084	-0.4369103854588	0.606490049041298	0.553995545673239	1.7769615087165	0.600833867276937	0.941280518631786
ENSG00000102316	MAGED2	HLC	-0.911957456678749	-1.12955687249455	-1.65468736393739	-0.0861205677087993	-0.47705025905071	-0.00152156357698363	0.75160184358264	0.687748433944946	0.1080594775607	0.836582476993702	0.838617066072136	1.03828478529306
ENSG00000185650	ZFP36L1	HLC	-0.792042563288747	-0.696429942805283	-0.384156544256726	-1.49149093423903	-0.638556913574657	-0.354617392970826	0.736082383839304	0.927489901098246	-0.320589292086215	1.0166494691637	0.928280101921556	1.06938172719868
ENSG00000137825	ITPKA	HLC	-0.918110149480382	-0.593720798185815	-0.531723451179829	-0.918110149480382	-0.918110149480382	-0.918110149480382	0.634627553522872	0.327780801298755	1.32497864927955	0.64779958268386	0.688574177008001	1.17412408349414
ENSG00000206256	PPT2	HLC	-1.07428352362605	-0.881860632981587	-0.128608342966626	-0.486196137647721	-0.593924483289558	-1.23200162453874	0.492773119327764	-0.124331334543306	0.721821560764936	0.93871540315578	1.09204638972069	1.27584960662442
ENSG00000183914	DNAH2	HLC	-0.616959883670209	-0.616959883670209	-0.616959883670209	-0.616959883670209	-0.616959883670209	-0.616959883670209	-0.0480198099175624	0.136494781574941	-0.399912880182861	1.28796649632595	1.9460094041144	0.779221310106386
ENSG00000115935	WIPF1	HLC	-0.830804941510588	-0.638382050866126	-1.22744431594845	0.238315624837343	-0.350445901174096	-0.604205006225088	1.05572673767031	-0.0898138995975168	0.744268656658539	-0.750152170239602	1.33552497183616	1.11741229455911
RP11-384F7.2	NA	HLC	0.032387573995114	-0.0927038169558885	-1.03561642166301	-0.755370959211256	-1.42200311996356	-0.978163228760774	0.130734583039697	1.1562666688702	0.358424427216782	0.757238609441128	0.925952193447551	0.922853490544007
ENSG00000170537	TMC7	HLC	-0.799106449922109	-0.686625052511845	-0.804924132593384	-0.534295333231866	-1.01101440380641	-0.567174512603629	1.64840020316275	0.335577159714194	0.0842104935599708	0.734338948344898	0.387559697704701	1.21305338218273
ENSG00000127955	GNAI1	HLC	-1.14316196111684	-1.27734349367672	-0.704826153653432	-0.728925051721371	-0.205008116556668	-0.50162908241305	0.931086875641626	0.802887512160849	0.0554010468816521	0.964952839583544	0.80212087087877	1.00444471399163
ENSG00000168952	STXBP6	HLC	-0.427506849295241	-0.0143459255476088	-0.265181782435001	-1.13077726695774	-1.33351793259633	-1.1636564463295	0.812285183357074	0.747223567742997	0.239551134657245	0.441097740631462	1.14255932272455	0.952269254048096
ENSG00000130300	PLVAP	HLC	-0.71311426777797	-0.71311426777797	-0.71311426777797	-0.71311426777797	-0.71311426777797	-0.71311426777797	-0.144174194025323	0.815966216553778	0.586228749307703	1.89514321592261	0.685459833733144	0.440061785175906
ENSG00000157388	CACNA1D	HLC	-0.557031616595897	-0.528348508427532	-0.731024075209304	-0.640691702935311	-1.11741077350986	-0.878489499984688	-0.141511640623573	0.411669710821891	0.663016773670483	1.06183095589483	1.23054453990125	1.22744583699771
ENSG00000166510	CCDC68	HLC	-0.632724588073015	-0.440301697428553	-0.823273691297849	-1.02936396251088	-1.02936396251088	-0.790442688985709	0.263594398534668	0.93955830449411	0.751063584669462	1.01923011565287	0.577320363977506	1.19470382347826
ENSG00000143375	CGN	HLC	-0.127918194079017	-0.718770916911286	-0.933833724100671	-0.720259334637746	-1.01300351283549	-1.00920529842746	-0.0537605519843796	1.07292331823296	0.588961956405456	0.958445706261629	1.0127960848755	0.943624467200512
ENSG00000012171	SEMA3B	HLC	-0.55530224431968	-0.767210198203983	-0.561119926990955	-0.767210198203983	-0.767210198203983	-0.528288924678814	0.208688934682301	0.673509320436632	-0.194751288112209	0.354723464569697	0.8394741282844	2.06469713074058
ENSG00000143867	OSR1	HLC	-0.807208479639858	-0.807208479639858	-0.807208479639858	-0.807208479639858	-0.533230074703898	-0.807208479639858	0.965592094396503	0.958490478553411	-0.234749569548084	0.758701252524384	0.981315718773602	1.13992249820337
ENSG00000123384	LRP1	HLC	-0.602422919942397	-1.12177140475977	-0.742251776831226	-0.727186347083306	-0.840811121841225	-0.475588613498982	-0.101137685741578	1.11908312952616	0.857769584666748	0.421792684422821	1.01608463297419	1.19643983810856
ENSG00000118495	PLAGL1	HLC	-0.3313764736725	-0.89175563058646	-0.685665359373432	-0.89175563058646	-0.89175563058646	-0.652834357061291	1.07194038680522	0.454835932934146	-0.034363865991863	0.469177788223376	1.67121365719815	0.712339182697581
ENSG00000117394	SLC2A1	HLC	-0.446202851843064	-0.673334567319782	-0.0863915564633784	-0.609455723804829	-0.638235950294578	-0.690587272695818	-0.302788961912784	-0.500786021111191	-0.0737405204756119	0.743992120576229	1.81715270740048	1.46037859794432
ENSG00000189060	H1F0	HLC	-1.19807221241851	-1.23736755329944	-1.22435230120982	-0.663232195686674	0.0722038738136348	0.112148369012393	0.298189451398658	0.816013103265478	0.40027721611689	0.640397246593827	0.868755440771839	1.11503956164172
ENSG00000149090	PAMR1	HLC	-0.730457395523031	-0.802707418666326	-0.921006498747865	-0.650377699386347	-1.12709676996089	-0.503857460237531	0.836599247430783	0.777213693718693	0.351032070639295	0.618256582190417	1.33236744066047	0.820034207882339
ENSG00000156103	MMP16	HLC	0.856278631280757	1.01048219849526	0.385261363786303	-1.10798888035779	-1.31072954599638	-0.801930559117784	0.698463102686426	-0.985991503402319	-0.489483053565955	0.463886127231411	0.642392283903267	0.639359835056802
EIF2B5;EPHB3	NA	HLC	-1.35312034236414	-1.35312034236414	-0.531174326815679	0.00657036640561026	0.0653937980447368	0.46308580704628	1.19144742435116	0.337936182133455	-0.947450362033254	0.94591404893627	0.435403856049319	0.739113890610377
ENSG00000203727	SAMD5	HLC	-0.912069960927295	-0.587680609632728	-0.912069960927295	-0.435350890352749	-0.638091555991335	-0.288830651203933	0.860730613109066	-0.158615295682145	-0.339611050835521	0.448863457882541	1.31503027390831	1.64769563065309
ENSG00000116991	SIPA1L2	HLC	-1.14503720362894	-1.28724353702861	-1.47920114050319	0.0911804818879549	0.0560800555719716	0.243918078128859	0.795637857244467	-0.108214228563643	0.46240710754352	0.379368528094339	1.01342482121659	0.977679180036683
ENSG00000175164	ABO	HLC	-0.615786999784002	-0.615786999784002	-0.615786999784002	-0.615786999784002	-0.615786999784002	-0.615786999784002	-0.615786999784002	0.730804563736604	0.775716660370432	-0.138494854075154	1.334201842251	1.60828078620514
ENSG00000241095	CYP51A1P1	HLC	-0.0863625514637598	-0.0344351929289868	-0.0214199408393707	-0.697102335184354	-0.859597045306366	-1.12481322241149	-0.0707761348911111	-0.610279830691506	-0.382530755515846	1.49902480430486	1.0957297146847	1.29256249024322
ENSG00000185813	PCYT2	HLC	-0.193401404254165	-0.67989391825236	-0.578109021507832	-0.434527483020686	-0.994977778398724	-0.645716873611322	-0.700016109582038	0.635354280344902	0.923788275494164	1.59380311690683	-0.113656008072264	1.1873529239535
ENSG00000196549	MME	HLC	0.252555394396474	0.00610743637053268	-0.0376356739901835	-0.538385460286094	0.00748135697244745	-0.0774478727701133	-0.629288602694741	-0.470800334750342	-1.8481792448471	1.04493440708978	1.25972040712899	1.03093818738034
ENSG00000069869	NEDD4	HLC	-0.0132461928697314	-0.976212285083949	-0.976212285083949	-0.718251014553038	-0.976212285083949	-0.532372393881166	0.796588288952412	-0.222757619838799	0.323130732001724	0.928714094912214	1.11897545962304	1.24785550090519
ENSG00000142186	SCYL1	HLC	-0.694851506013107	-0.880945366368154	-0.618217792363398	-0.953146051683064	-0.444753606788039	-1.03654450483323	0.58118111154644	0.612646725187494	0.32857540104532	1.42968582918405	0.738351020932382	0.938018740153306
ENSG00000139174	PRICKLE1	HLC	-1.13138029756199	-0.938957406917531	-1.52801967199986	0.215905552463642	-0.227039058565755	0.288186477410565	1.51663668136657	0.237679286193412	0.182562049708957	0.376906707996307	0.931444538621502	0.0760751412841842
ENSG00000087116	ADAMTS2	HLC	-0.0988106648238536	-0.659189821737813	-0.272803123437261	-0.659189821737813	-0.385211416801853	-0.659189821737813	-0.659189821737813	-0.0604733742077945	-0.659189821737813	1.38940425642594	1.29079902029719	1.4330444112367
ENSG00000109906	ZBTB16	HLC	-0.635394684868093	-0.635394684868093	-0.635394684868093	-0.635394684868093	-0.635394684868093	-0.396473411342924	-0.635394684868093	0.610496265911044	1.07518703684072	-0.158102539159245	1.71256062854302	0.968700128415947
ENSG00000114423	CBLB	HLC	-0.360263441981809	-0.160745854651523	-1.07604996822905	-1.05867381455658	-0.891174957714726	-0.932371322216472	0.241050083642834	0.964315436246252	0.744368678576412	1.11612833725507	0.843338727977004	0.570078095652586
ENSG00000264230	ANXA8L1	HLC	-0.618153842800239	-0.830061796684542	-0.830061796684542	-0.830061796684542	-0.325924346054252	-0.591140523159373	1.45310925693422	0.063130370787762	0.151141943736268	0.00526126260558257	1.39703843815106	0.955722829852594
ENSG00000166130	IKBIP	HLC	-1.02648454464001	-1.12710500527667	-1.36173862204349	-0.126200633495869	-0.255249335136409	-0.159128447787796	0.11592503177645	0.605981155221368	0.984060003579185	1.07619112786628	0.259112798671696	1.01463647126527
ENSG00000010803	SCMH1	HLC	-0.700906146075425	-0.602252431451771	-0.727186234866738	-1.23507208965002	-0.346810359415541	-0.493603083355382	0.0627579334751358	0.0775207006711014	0.359044537388136	1.00952517957719	1.47110400270768	1.12587799099564
ENSG00000103485	QPRT	HLC	-0.484010783586415	-1.66400027182346	-0.610955352055328	0.313028803324203	0.147327271162466	0.698477672640012	-1.09506019807082	0.240310191856125	-0.272496611669027	0.74563802939623	0.898969015961145	1.08277223286487
ENSG00000050555	LAMC3	HLC	-0.126897842065059	-0.815207521455631	-0.462151919468539	-1.14630851600704	0.12291977907365	-0.0141582140807324	0.148467916465299	-0.511077619065651	-0.831810876446181	1.10809345558721	1.58754453349307	0.940586823969609
ENSG00000123240	OPTN	HLC	-1.31540306097309	-1.38765308411639	-0.890096419862495	-0.147480398196135	-0.0837934064010737	-0.226049234301097	0.571128618207808	1.02305837849585	0.0683851117693837	0.896215048289621	0.747421775210402	0.744266671877225
ENSG00000153707	PTPRD	HLC	-0.221559316398687	-0.277253983436994	-0.648031073718164	-0.488571758826201	-1.46687868097995	-0.837420412210514	0.988366455700023	0.13774092884348	-0.189376510621323	0.746076687745828	1.27202706292789	0.984880600974614
ENSG00000157613	CREB3L1	HLC	-0.31978159669132	-0.88016075360528	-0.674070482392251	-0.88016075360528	-0.376023302974989	-0.641239480080111	1.0835352637864	0.0130314138670244	-0.474490773274392	1.41887363769513	0.518413347905834	1.21207347936924
ENSG00000159399	HK2	HLC	-0.712134158329268	-0.53488087041654	-0.635500444679558	-0.306367864855472	-0.075483198341983	0.0434199669188731	-1.42139556741718	-0.0952493350118209	0.252590143961272	0.95963750841732	1.652800844455	0.872562975299357
ENSG00000041353	RAB27B	HLC	-0.78693387754326	-0.462544526248693	-0.240300295794027	-0.78693387754326	-0.5129554726073	-0.78693387754326	0.765803825459995	0.106258289929044	-0.0649856489037517	1.39230785186143	-0.292157620811833	1.66937522974492
ENSG00000133131	MORC4	HLC	-0.651151107409123	-0.622467999240758	-0.66489668257385	-0.734811193748537	-0.707392813692793	-0.7676903731203	0.920728459116076	-0.190948204895727	-0.0106393855860771	1.30083297780208	0.883657480383908	1.2447788429651
ENSG00000189143	CLDN4	HLC	-0.304083342689998	-0.687108902623084	-0.805407982704623	-1.01149825391765	-0.737519848981691	-0.772576980392482	0.76130232011871	0.754200704275618	0.287844763168022	1.59675922978293	0.143801921344769	0.774286372619486
ENSG00000213626	LBH	HLC	-0.864968401060911	-1.36709752302079	-0.785655409051839	-0.475032613084652	0.235860445003103	-0.122378134773982	0.432564665867915	0.384673516053826	-0.60661817804333	1.22966243856139	1.23477996794844	0.70420922560083
ENSG00000138080	EMILIN1	HLC	-0.331916467975709	-0.543824421860012	-0.543824421860012	-0.543824421860012	-0.543824421860012	-0.543824421860012	-0.543824421860012	0.349367745612292	-0.543824421860012	1.02208531030423	0.854749679651101	1.91248468542817
ENSG00000166848	TERF2IP	HLC	-1.0844569142976	-1.15257819941023	-0.707544566959369	-0.642797482774822	-0.432268199535539	-0.475098516597372	0.658425829770515	0.832302378099678	0.285924641446022	1.09781985634697	0.513234154585448	1.1070370193263
ENSG00000112414	ADGRG6	HLC	-0.353807868992414	-0.472160515137743	-0.514589198470834	-1.06122278022007	-1.06122278022007	-0.822301506694899	0.231735580825478	0.90769948678492	0.416906060380121	0.299710638589768	1.39824143040129	1.03101145275445
ENSG00000134533	RERG	HLC	-0.235600236767474	-0.206917128599109	-0.589889122468406	-0.538018123150523	-0.795979393681434	-0.795979393681434	0.496978967364111	-0.197262946151415	-0.390309413350547	0.325954269092246	0.810704932806949	2.11631758858704
ENSG00000134258	VTCN1	HLC	-0.522684390012739	-0.734592343897042	-0.734592343897042	-0.734592343897042	-0.734592343897042	-0.734592343897042	-0.165652270144395	0.611999219623564	0.656911316257392	0.387341318876638	1.49250789093856	1.21253863394619
ENSG00000125503	PPP1R12C	HLC	-0.663936017613826	-1.3522456970044	-0.999190095017306	0.356104729954903	-0.522793821677845	0.518844457528677	-0.388570259083468	0.148755528571265	0.030405010520266	0.237933767317963	1.25750739821231	1.37718499829146
ENSG00000118523	CTGF	HLC	0.393596859881356	-0.354411475312597	-0.108371209867936	-0.239723004679692	-1.3605567611908	-0.737317451467442	1.98785031339864	-0.4673645937185	-0.265331863824421	0.688037316972945	0.427967437222656	0.0356244325857911
ENSG00000117984	CTSD	HLC	-0.35098678296426	-0.61391765108058	-0.879907980295547	-0.592112861730781	-0.723961381132725	-1.18762028851961	0.346259011991581	0.477768901634807	0.35388598513556	1.1817159216558	0.668646182662211	1.32023094264355
ENSG00000147408	CSGALNACT1	HLC	-0.684565260360845	-0.684565260360845	-0.684565260360845	-0.684565260360845	-0.684565260360845	-0.684565260360845	1.59860579325792	0.208626907111459	0.172826504233752	0.15075779892928	0.714008841150269	1.26256571748239
ENSG00000149294	NCAM1	HLC	-0.897295598346116	-0.969545621489411	-0.471988957235517	-0.173101216272867	-0.789797522153688	-0.670695663060616	0.258802730219276	0.736829041525306	-0.312731232363169	0.75465910537977	1.26903431500063	1.2658306187964
ENSG00000163590	PPM1L	HLC	0.580165762241995	0.322651553115312	-0.118935067562636	-0.939770693866395	-1.2700619435501	-1.15096008445703	0.358059329258765	-0.00850043598712524	-0.573308515443388	1.08855990606112	1.14144297386232	0.570657216327171
ENSG00000185352	HS6ST3	HLC	-0.483510293942769	-0.147600298642788	0.182906716336665	-0.489923082165034	-0.621771601566978	-0.88051189127625	-1.32435178247903	0.877464138506715	0.868392676349815	0.854889946925653	1.33519120147916	-0.171175729525157
ENSG00000176978	DPP7	HLC	-0.531243700955671	-0.927883075393533	-0.927883075393533	-0.451164004818987	-0.653904670457573	-0.48404318419075	-0.358943001640887	0.418708488127073	0.550245765206655	0.97704330460263	0.860641123019927	1.52842603189465
ENSG00000180530	NRIP1	HLC	-0.273799650669947	-0.9812145618976	-0.9812145618976	-0.9812145618976	-0.70723615696164	0.0758264396097843	1.43856695899176	0.631125946355144	-0.123822797303003	0.923711818098564	0.80730963651586	0.171961491056276
ENSG00000164932	CTHRC1	HLC	-0.556989163251691	-0.364566272607228	-0.40699495594032	-0.695667267158642	-0.953628537689553	-0.714707264164384	-0.384688463936906	0.292262413089584	0.0275752027312568	1.34540585361086	1.14155920701744	1.27043924829959
ENSG00000125844	RRBP1	HLC	-0.682591066507044	-1.54366347205437	-0.895460804314736	0.379752741444447	-0.682222223464951	0.645608167754371	0.01968522565413	0.419804204560694	-0.296825018096484	0.531475962009244	0.963691188601956	1.14074509441274
ENSG00000148942	SLC5A12	HLC	-0.401216714278827	-0.208793823634364	-0.797856088716689	-0.321137018142142	-0.523877683780728	-0.174616778993326	0.495102272328857	-0.797856088716689	-0.797856088716689	1.50117830258372	0.600718012794425	1.42621169727245
ENSG00000073417	PDE8A	HLC	-0.794897408183114	-1.43347414910276	-0.704818580629198	-0.193301463182511	-0.339349359988455	-0.0973367290840046	-0.464905139351787	0.939598732565127	0.213849472209657	0.65177480082236	1.23395081963369	0.988909004290996
ENSG00000067064	IDI1	HLC	-0.571798099181916	-0.419033582707236	0.22431728043469	-0.858855274503311	-0.988694964391336	-1.22848342400383	0.348971777702821	0.579039526406881	0.224464365538982	1.51029605534129	0.319338852953776	0.860437486409187
ENSG00000159251	ACTC1	HLC	-0.018769136602061	-0.535221273843758	-0.312977043389092	-0.859610625138325	-0.859610625138325	-0.859610625138325	0.43334773590722	-0.434245392479589	0.235614272228058	1.55002767608137	1.36748960969728	0.293565427815551
ENSG00000162174	ASRGL1	HLC	-0.403822358405923	-0.771187935678769	-0.427763319001619	-0.74938314632897	-0.706813431868615	-0.406997869646885	-1.01487177289032	0.770908058632314	0.659276952116966	1.19900012128497	0.979157441141638	0.872497260645212
ENSG00000162302	RPS6KA4	HLC	-0.778606493800049	-0.526361739749809	-0.285940730945875	-0.672353489961707	-1.06500724577805	-0.715746340990646	1.08079587017535	0.00760591280659773	0.508061821475523	1.07065265050568	0.0595884507971047	1.31731133546587
ENSG00000143164	DCAF6	HLC	-1.13231188584039	-0.87776095686596	-0.561264200731747	-0.609673504651395	-0.691869881797381	-0.328995282019743	-0.1669210589097	0.536885770515471	1.0414455607933	0.846685128201449	1.09856078230357	0.845219529002519
ENSG00000137449	CPEB2	HLC	-0.55523353388848	-0.55523353388848	-0.55523353388848	-0.0785144633139332	-0.55523353388848	-0.55523353388848	1.72793751973028	0.198221131356671	-0.55523353388848	0.805699884921356	1.23329066452498	-0.55523353388848
ENSG00000168938	PPIC	HLC	-0.888761269804279	-0.674975878182253	-0.695678834377147	-0.606527530012503	-0.678711599430451	-0.925310593740353	0.111968655373178	0.807087969313667	1.02242572359197	0.756530121682079	1.06391500602421	0.708038229561885
FAM65A	NA	HLC	-1.32803809767675	-1.13561520703229	-0.671632552346479	-0.364986763344861	-0.551661709526566	0.297466257445972	0.934737134854553	0.244244794890375	0.12237000007492	0.454564257290074	0.734786738506746	1.2637651468643
ENSG00000140386	SCAPER	HLC	-0.613043418323866	-0.297264950812085	-0.548100807699477	-0.530724654027012	-0.363225797185157	-1.10763797098221	-0.914516229910479	0.807046870165696	0.951432015909397	0.80775771521331	0.569048847824595	1.23922837982729
ENSG00000031081	ARHGAP31	HLC	0.207923391218412	-0.278569122779783	-0.661541116649079	-0.200999227109806	-0.867631387862108	-0.867631387862108	-0.298691314109461	-0.867631387862108	0.431711629223565	0.698278344302135	1.22755635684488	1.47722522264546
ENSG00000177106	EPS8L2	HLC	-0.0660161741580243	-0.817181601943977	-0.594937371489311	-1.14157095323854	-0.108984907676506	-0.2151541849604	-1.14157095323854	1.11303419895509	0.638856593941796	0.603782398912767	1.08552928159706	0.644213673298593
ENSG00000115548	KDM3A	HLC	-0.213172080290119	-0.571790240078766	-0.592493196273661	0.429114131702031	-0.0258512933665274	-0.571727746918927	-1.74854172391501	0.453274197070737	0.494547074844924	0.300052354248738	1.45027363638402	0.596314886592554
ENSG00000108861	DUSP3	HLC	-0.631156979665682	-1.48675711660816	-0.15588214128497	-0.826419707486537	-0.392632327493851	-0.754105466395344	0.733421298812576	0.847668863429436	0.527648569329692	0.701216774222437	1.02407691505399	0.412921318086411
ENSG00000167528	ZNF641	HLC	-0.82693513277512	-0.449780821577098	-0.832752815446395	-0.562124016084877	-0.161844671885069	-0.256065694844869	-0.0629439537731389	-0.440126639129404	-0.181451322064826	1.00975099150433	1.05634465804757	1.70792941802891
ENSG00000084636	COL16A1	HLC	-0.0479715097183973	-0.755386420946051	-0.549296149733022	-0.49742515041514	-0.755386420946051	-0.755386420946051	-0.186446347193404	-0.00193175570090043	-0.182927510854276	1.54364797035436	1.33980132376094	0.84870839233799
ENSG00000138814	PPP3CA	HLC	-0.400077322048736	-0.144428059123815	-0.126741525526076	-1.25421130614295	-0.802574471926775	-1.12790881380284	0.926563368117868	0.228558714098952	0.0545836910663695	0.530562966772465	1.24411606758723	0.871556690928312
ENSG00000110422	HIPK3	HLC	-1.13364331400627	-0.793296334961771	-0.589955966931754	-1.03647801710908	-0.453630803918371	-0.357509916569757	0.702273144009912	0.407599686439407	0.494355969102998	1.12673620201897	0.759465293408463	0.874084058517257
ENSG00000117152	RGS4	HLC	-0.420887044106431	-0.632794997990734	0.0580521638361184	-0.632794997990734	-0.632794997990734	-0.632794997990734	0.34310413489555	0.26039716948157	-0.415747994503386	0.728138420819102	2.1172606622661	-0.139137520725688
ENSG00000166949	SMAD3	HLC	-0.624576159112508	-1.26634294210698	-1.38811969124433	0.431717810226828	-0.356276422522697	0.427649952423337	0.465600913644124	-0.0482028387618962	0.164121945688755	-0.0303727749074314	1.24299709295815	0.981803113714641
ENSG00000171234	UGT2B7	HLC	-0.575551574495354	-0.575551574495354	-0.575551574495354	-0.575551574495354	-0.575551574495354	-0.575551574495354	-0.575551574495354	-0.150186341836618	0.723791442590319	1.60369015490933	0.823022527015759	1.02854323878869
ENSG00000169047	IRS1	HLC	-0.322280485766115	-1.02904090093536	-0.416303282335865	-0.641230347556781	-1.32879396999725	-0.183648655211018	0.751763147549243	-0.0587708941364768	0.46269332120747	0.804684715109087	1.3348124079001	0.626114944172959
ENSG00000116574	RHOU	HLC	-0.756915966222037	-0.756915966222037	-0.370529267921484	-0.498954695691126	-0.252778515591747	-0.133676656498675	-0.756915966222037	-0.158199518692018	-0.0349677375825288	0.988437385929273	1.70254824439932	1.0288686603151
ENSG00000161011	SQSTM1	HLC	-0.396884570614473	-0.588727730666826	-0.823361347433654	-0.299719273717278	-0.888480799728717	-0.839062446224927	0.65430230638629	-0.153138706250326	0.0149483326772688	0.842778269197506	0.984576445753765	1.49276952062137
ENSG00000087076	HSD17B14	HLC	-0.755210636312044	-1.15185001074991	-0.945759739536878	-0.167123250333716	-0.449269829837851	-0.528610701026544	0.141108350295639	0.613848947443362	0.988729569176078	0.20908340805993	1.4111192770347	0.63393461578723
ENSG00000113448	PDE4D	HLC	-1.08095886563966	-1.08419687004046	-1.10489982623536	0.147037709730544	-0.733758788265102	-0.00324105609738989	0.0222226997420565	0.615594127644834	0.735645573121162	0.883516627808461	0.803217055321801	0.799821612909113
PVR;CEACAM19	NA	HLC	-0.776583681440604	-0.671374681704058	-0.937365010919024	-0.363164836157146	-0.979861142037967	-0.0938870202110342	0.288801981368104	0.420311871011329	0.0758474122164285	0.925639708551435	0.465990249366743	1.64564514995579
ENSG00000130779	CLIP1	HLC	-1.0989240616952	-1.16833355489751	-0.747336332578456	-0.0606480723642004	-0.647289275164113	-0.434013503106926	0.245302680113642	0.767902867296814	0.494006865203354	0.764029140446224	1.14748510525362	0.737818141492754
MRPS6;SLC5A3;AP000320.7	NA	HLC	-0.634302103341316	-0.649349515444374	-0.720762083672767	-0.28595146404692	-0.697593308763579	-0.0673852374205817	0.733042982913276	-0.20995504017406	-0.835474091845073	0.971445951529374	1.37183428709919	1.02444962316683
ENSG00000003989	SLC7A2	HLC	0.0175592137270932	-0.111990408156909	0.195697023183535	-0.931772757433341	-1.25887742064105	-0.901351893745868	-0.327767448811416	-0.144441975567966	0.221574268934327	0.975596137410025	1.29898999218022	0.966785268921351
ENSG00000183287	CCBE1	HLC	-0.451245852383934	0.697316613635207	0.144423518343456	-1.01162500929789	-0.737646604361933	-0.772703735772725	-0.442684935545247	-0.412908561767875	-0.289676780658385	1.28740938200252	0.776899189115567	1.21244277669125
ENSG00000171992	SYNPO	HLC	-0.702464925534926	-0.702464925534926	-0.702464925534926	-0.444503655004015	-0.702464925534926	-0.702464925534926	0.273434207351358	0.31811713389243	-0.130006015443152	1.34612915262882	1.24752391650007	0.901629887749114
ENSG00000142494	SLC47A1	HLC	-0.844091578396964	-0.916341601540259	-1.24073095283483	-0.406302252520828	-0.538150771922771	-0.457953561020272	0.72296506455685	0.849332537823162	0.606316519354706	0.664195427161337	0.709257889200174	0.851503280139691
ENSG00000231672	DIRC3	HLC	-1.07320423174165	-1.07320423174165	-0.867113960528624	-0.596485161167105	-0.196205816967297	0.316907340715571	0.219754129303893	0.0644261846092817	0.127686646995354	0.672149120409659	1.38625997887971	1.01903000123287
AMACR;C1QTNF3-AMACR	NA	HLC	-0.337488740101587	0.223992563569227	-0.620672832403611	-1.03842968341248	-0.345668818114873	-0.946441615448335	-0.579900022680933	0.0314520799531079	1.3412587747942	1.33420571917445	0.354241851109126	0.583450723561703
ENSG00000112335	SNX3	HLC	-1.15682401316134	-0.224164084591528	-1.16707668929865	-0.719034687285199	-0.252482774165097	0.0224343190094438	0.219337186437163	-0.307572436820061	0.418249585007791	1.05479409610138	1.00950590018541	1.10283359858068
ENSG00000165105	RASEF	HLC	0.166961912492525	-0.474804870501948	-0.131380253824797	-1.02946751093524	-1.01345037653019	-0.664189471742785	0.00552957957939793	-0.394236613993843	0.104074878688287	1.12220951975354	1.37211420249205	0.936639004522992
ENSG00000154144	TBRG1	HLC	-0.526242444535981	-1.06121385615718	-0.348368791828355	-0.625027554049006	-0.408707242713339	-0.57175162456544	0.336394093036327	-0.173742309394153	-0.189667177437016	1.4977183706748	1.06199124371388	1.00861729325547
ENSG00000164465	DCBLD1	HLC	-1.27932816682614	-0.678612209746239	-0.669290105161977	-1.01451705013589	-0.0727219803015609	-0.101124548253215	0.472459896681237	0.0378443636213097	1.02180161442698	1.02112712141473	0.297288077703022	0.965072986577743
ENSG00000013297	CLDN11	HLC	-1.25281993995725	-0.928459573818008	-1.21373056981504	-0.241216348992602	-0.116980252340363	-0.141978023407605	0.87510767509579	0.128010964757888	0.764329969585701	0.547158079452577	0.747595647817317	0.8329823716216
ENSG00000158104	HPD	HLC	-0.732223120575732	-0.732223120575732	-0.732223120575732	-0.732223120575732	-0.732223120575732	-0.732223120575732	0.560735240469813	0.614368442944874	0.56711989650994	1.01313023157558	0.423077054686688	1.2149078572675
ENSG00000064601	CTSA	HLC	-1.27147937002822	-0.0749683324814017	-0.51207021682473	-0.547284987954968	-0.791120329691725	-0.491304767469996	0.295577272925596	-0.139038260134332	0.362106984752399	1.41090722507514	1.08193691579076	0.676737866041485
ENSG00000141002	TCF25	HLC	-0.599973556857168	-1.02482787492166	-0.564638075493591	-0.61020195346583	-0.725878148919446	-0.86813397681947	0.510729129776434	0.681700992462418	0.420854053899667	0.79033780375584	0.967836768100006	1.0221948384828
ENSG00000185942	NKAIN3	HLC	0.00894090890708465	0.51322317520512	-0.4073916015579	-0.954025183307133	-0.449887732676843	-0.510185292104349	-0.385085109554486	-0.725722150182131	-0.381566273215359	1.45561311791256	1.39393013010398	0.442156010469462
MAGI2;MAGI2-IT1	NA	HLC	-0.596480734619496	-0.596480734619496	-0.596480734619496	-0.596480734619496	-0.596480734619496	-0.596480734619496	0.379418398266788	0.156973930625654	-0.190810754288609	0.238842324670628	1.49870701008749	1.49575349835502
ENSG00000132938	MTUS2	HLC	-1.09490987106458	-0.770520519770018	-0.888819599851557	-0.428277710312283	-0.392329690152529	-0.168493102786441	-0.119010738178301	0.741758892528792	0.876803101542404	0.0270237917090954	1.36455433955677	0.852221106778647
ENSG00000197976	AKAP17A	HLC	-0.521303328467399	-1.45924447341022	-1.30934123164707	0.433978077242234	0.221128022527083	0.602336320054379	1.07507562374215	-0.0631026956157488	-0.222300960528489	0.0469734828367407	0.914418417866446	0.281382745399904
ENSG00000106823	ECM2	HLC	-0.359336876786508	-0.57124483067081	-0.57124483067081	-0.57124483067081	-0.57124483067081	-0.57124483067081	-0.57124483067081	0.321947336801494	0.988601174213875	1.7277895606296	-0.0764685739393838	0.824936363105785
ENSG00000006282	SPATA20	HLC	-1.25701756998931	-0.932628218694743	-0.566170408162458	-0.999056299458399	0.270171995622295	-0.330600801711166	0.0359407910562348	0.890003920645815	0.714695402617679	0.791576508174439	0.69297127204569	0.690113407853922
ENSG00000138448	ITGAV	HLC	-1.41526552126579	-0.674694390567905	-0.766883155876041	-0.313164444729272	-0.176525768025019	-0.406082823540188	1.21911354279837	0.0454251222197071	0.0626776583733522	0.776239303266803	0.94460199673263	0.704558480613354
ENSG00000183044	ABAT	HLC	-0.299758027361217	-1.00717293858887	-1.00717293858887	-0.172744238274872	-0.73319453365291	-0.563333047386087	0.545564764414384	0.130457477762063	0.839874533600661	0.11476072418481	1.55579634919574	0.59692187469517
ENSG00000180628	PCGF5	HLC	-0.627838960315155	-0.839746914199457	-0.453360215898905	-0.839746914199457	-0.137166733287402	-0.395907022996674	-0.839746914199457	0.40614403657968	0.638381926400731	0.726162817964785	1.25544083050753	1.10738406364377
ENSG00000163431	LMOD1	HLC	-0.291925029116047	-0.688564403553909	-0.688564403553909	-0.688564403553909	-0.688564403553909	-0.688564403553909	-0.119624329801263	0.752155115086706	0.0333838250855991	0.433369259219771	1.09995979485955	1.53550338243523
ENSG00000171951	SCG2	HLC	-0.478709891091273	-0.478709891091273	-0.478709891091273	-0.478709891091273	-0.478709891091273	-0.478709891091273	-0.478709891091273	-0.250406857966271	-0.261662887603925	1.26664346106004	1.12797443539711	1.46842108675196
ENSG00000127920	GNG11	HLC	-0.660615330326799	-0.283461019128777	-0.872523284211102	-0.614562013680191	-0.872523284211102	-0.872523284211102	0.103375848675182	0.964145479382275	0.426819732874571	0.872830067940209	1.0774655578239	0.731571529072939
ENSG00000178538	CA8	HLC	0.181499099911685	0.00765489755284632	-0.0563725212559443	-0.521771317750815	0.174525374262685	-0.375251078601999	-0.998490388325361	-0.399773940795342	-0.998490388325361	0.362443030484475	1.83673299463136	0.787294238211775
ENSG00000105792	CFAP69	HLC	-0.479802581135458	-0.87644195557332	-0.670351684360292	-0.87644195557332	-0.87644195557332	-0.637520682048151	0.676295747429935	0.652638528758428	0.601686885026869	1.02848442442284	0.730242370915063	0.727652857710721
ENSG00000109220	CHIC2	HLC	-0.664789456744511	-0.203285402758323	-1.17706228363377	-0.759489441933432	-0.818199537269082	-0.378714813034391	1.42128523232739	0.578282082259276	0.265187841569836	0.393183091421982	0.630875509553652	0.712727178241377
ENSG00000151726	ACSL1	HLC	-0.732606879265883	-0.518821487643856	-0.642528051711968	-0.450373139474106	-0.0673239424702188	-0.408171865480987	-1.12663289772745	0.506242949505647	0.817464763657317	1.00260010652997	1.36859243771841	0.251558006363131
ENSG00000134817	APLNR	HLC	-0.761765641949393	-0.761765641949393	-0.761765641949393	-0.503804371418482	-0.257628191319103	-0.138526332226031	-0.192825568196747	-0.00831097670424308	-0.189306731857619	0.804144090214849	1.58618967146172	1.18536533589384
ENSG00000109452	INPP4B	HLC	-0.803659428766385	-0.479270077471817	-0.597569157553357	-0.545698158235474	-0.803659428766385	-0.564738155241216	0.1722397041199	0.0895327387059193	0.397231449970621	1.49537496253403	0.351640746496035	1.28857480420813
ENSG00000065809	FAM107B	HLC	-0.492937971679954	-1.13470475467443	-1.25648150381177	-0.382766628423805	-0.420139100027021	-0.131122516228205	1.17946797590129	0.588916756927394	0.295760133121309	0.565034576486539	0.147859079068365	1.04111395334029
ENSG00000174807	CD248	HLC	-0.568044476206419	0.021017788875906	-0.181657777905866	-0.568044476206419	-0.568044476206419	-0.568044476206419	-0.568044476206419	-0.339741443081417	-0.350997472719071	1.33688190378974	0.830529625304695	1.5241897567681
ENSG00000107862	GBF1	HLC	-0.904541141711555	-0.897552771377706	-0.678592765351593	-0.44651191315185	-0.858153757868509	-0.494619283353206	0.855509884274131	0.475919047727572	0.561277878110127	0.417898530721311	0.867464069366704	1.10190222261457
ENSG00000115604	IL18R1	HLC	-0.861976927268937	-0.861976927268937	-0.861976927268937	0.122749833147254	0.170609118293101	-0.238737617545574	-0.861976927268937	-0.263260479738918	0.616151913331252	0.883376424882374	1.23321081743805	0.9238076992682
ENSG00000101255	TRIB3	HLC	-0.0112142374775588	-0.0806237306798709	-0.395921854731226	-0.828807746027167	-0.812790611622118	-1.08676901655808	0.465968686445176	0.0508613997928551	-0.229377251963482	1.61140406145199	0.311805084953035	1.00546521641644
ENSG00000101000	PROCR	HLC	-0.116155852553766	-0.155451193434695	0.485218818276276	-1.22678922591145	-0.782170315530309	-1.2458292229172	0.0679872065608902	0.280948461750904	-0.00662165584217611	0.694491232962322	0.74234973839324	1.26202200824596
ENSG00000162368	CMPK1	HLC	-0.9034931800621	-0.64974865613495	-0.636733404045334	-0.513288018356826	-0.678067345708518	-0.922006957635235	0.885808348563144	0.423239104530056	0.533989775994799	0.629209524557957	0.680495024815575	1.15059578348143
ENSG00000204178	TMEM57	HLC	-0.155117599249463	-1.10810019242779	-0.885855961973126	-0.765857382970057	-0.555491128948005	-0.042377971265136	-0.139531182676814	0.096590940609389	0.347938003457981	0.866544847578052	1.026974666899	1.31428296096597
RP11-383J24.1	NA	HLC	-0.374355245067473	-0.374355245067473	-0.374355245067473	-0.374355245067473	-0.374355245067473	-0.374355245067473	2.28505936190169	-0.374355245067473	-0.374355245067473	0.102936900641375	0.120421011663953	0.486424686332767
ENSG00000104549	SQLE	HLC	-0.166999159189693	-0.764705563759676	0.0636736967505298	-1.01898444415392	-0.808384493220506	-0.959650963282773	1.14831315989885	0.692535654733098	-0.108778252672835	0.824699439076507	0.175272243988714	0.923008681831696
ENSG00000104415	WISP1	HLC	-0.720418013619328	-0.720418013619328	-0.720418013619328	-0.720418013619328	-0.720418013619328	-0.481496740094159	0.572540347426217	0.172774153852976	0.480472865117678	0.401515649154352	1.22957082841567	1.2267129642239
ENSG00000215386	MIR99AHG	HLC	-0.55780061338183	-0.769708567266132	-0.769708567266132	-0.511747296735221	-0.495730162330172	-0.325868676063349	-0.200768493513486	-0.170992119736114	0.431182311470874	0.591224851543704	1.45739166756947	1.32252566570839
ENSG00000169439	SDC2	HLC	0.149147458462701	0.42571627829701	0.052802475471577	-0.836705968684697	-1.39715626406274	-1.22729477779591	0.612036384620068	0.583470483194935	-0.279631008844261	0.508107060405991	0.988408314959499	0.421099563975822
ENSG00000105223	PLD3	HLC	-0.537099025129119	-0.665059546171736	-0.350824131100562	-0.737260231486646	-0.758495025401661	-1.09107388349292	0.72332564595464	0.698077502526928	0.11166890987657	0.898862161029049	1.05941933672155	0.648458286673907
ENSG00000038427	VCAN	HLC	-0.214227369499272	-0.658328498431548	-0.468212493642104	-0.635216725415179	-0.798982315136853	-0.701555392502206	-0.130331507599853	-0.177176409840108	0.248995503177746	1.06826354444373	1.24462333646009	1.22214832798557
ENSG00000171621	SPSB1	HLC	-0.366293286905325	-0.749318846838411	-0.86761792691995	-0.815746927602067	-0.569570747502687	-0.450468888409616	0.479029504870277	0.367011320507638	0.021516699233405	0.492201534031265	1.58583478582522	0.873422779710254
ENSG00000174992	ZG16	HLC	-0.474662104444325	-0.474662104444325	-0.474662104444325	-0.474662104444325	-0.474662104444325	-0.474662104444325	-0.474662104444325	-0.474662104444325	0.247286124195183	1.70457962496036	0.923911997066788	0.92151908933227
ENSG00000165915	SLC39A13	HLC	-0.0801784310562996	-0.879598298835568	-0.349907654702482	-1.02559004904746	-0.659636164237729	-0.515408232803683	-0.139484506796512	0.397841280858221	0.0183595119090465	1.24628577142218	0.767242000821591	1.22007477246871
ENSG00000139144	PIK3C2G	HLC	-0.509581780881159	-0.721489734765462	-0.515399463552434	-0.721489734765462	-0.721489734765462	-0.721489734765462	-0.152549661012815	0.890850773487283	0.479401143971544	0.400443928008218	1.22849910726954	1.06429489177167
ENSG00000129422	MTUS1	HLC	-0.389777276551917	-1.35274336876614	-0.966356670465582	0.211818668448686	0.17444619684547	0.0373682036910878	-0.376844235879851	0.849072552219613	0.284438246580037	-0.517420309476011	0.742444375940856	1.30355361741374
ENSG00000240583	AQP1	HLC	-0.511493519774286	-0.511493519774286	-0.511493519774286	-0.511493519774286	-0.511493519774286	-0.511493519774286	0.464405613111998	-0.0861282871155504	-0.294446516286938	-0.0342013740654386	1.5836942249327	1.43563745806895
ENSG00000125378	BMP4	HLC	-0.701958637043326	-0.77420866018662	-0.407750849654335	-0.840636740950277	-0.594460560850897	-0.475358701757825	1.32118350940817	0.0390324048697459	-0.00337311411480457	1.0806437179235	0.851390830553813	0.505496801802853
ENSG00000143850	PLEKHA6	HLC	-0.0872795796109167	-1.36465152408381	-0.542705508535352	0.10110841670198	-0.191635761495767	-0.920811632881029	1.4011377442025	0.164428960247935	-0.383447783663003	0.54027485591235	0.862448710751791	0.421133102453323
ENSG00000155974	GRIP1	HLC	-0.161491796022279	-0.616311648380248	-0.601316126843076	-0.211422502901831	-1.1522375087253	-0.664726500000021	0.719403082053075	0.0294666339619347	-0.2387957329716	0.941806332299768	1.44897170989837	0.506654057631212
ENSG00000076641	PAG1	HLC	-0.675986023202704	-1.07262539764057	-0.866535126427538	-0.0878986372243755	-0.370045216728511	-0.449386087917204	0.220332963404979	0.0650050187103672	0.0225994997258168	1.22640899365984	0.715898800772894	1.272231212867
ENSG00000173559	NABP1	HLC	-0.318346282887426	-1.02576119411508	-0.334914032288227	-0.767799923584169	-0.521623743484789	-0.581921302912296	1.63365341285408	-0.00517913468772369	0.0694637032513032	0.719592158036231	0.372812907396034	0.760023432422057
ENSG00000151327	FAM177A1	HLC	-1.15502137076352	-1.44829951796387	-0.793772828234562	-0.220503027380389	0.037533910384103	0.000584767117312701	0.322002304756386	0.56231375025832	0.776989808189365	0.602777986135074	0.65948865335556	0.655905564146217
TMEM141;RP11-216L13.17	NA	HLC	-0.752848813488484	-0.752848813488484	-0.546758542275456	-0.276129742913938	-0.752848813488484	-0.752848813488484	-0.183908739735838	1.08381995010489	0.725280027111704	0.369084849285196	0.645725288022629	1.19428216435475
ENSG00000086598	TMED2	HLC	-0.838880951986367	-0.444903944192133	-0.584944040026596	-0.710240300719309	-0.788171391703792	-0.757663504419916	1.14585616053586	0.210475443704788	0.429330935969015	0.894791755835644	0.688512246729748	0.755837590273051
ENSG00000153113	CAST	HLC	0.000192190415781113	-0.358425969372866	-0.713231437660649	-1.05845838263456	-1.03104000257882	-0.608760684930966	0.428518564182566	0.155879071288485	0.436535519397879	0.977185788916055	0.560010291497881	1.21159505147922
SNX14;RP11-321N4.5	NA	HLC	-1.43552285490397	-0.834806897824069	-0.594385889020135	0.329598266359397	-0.120241243176663	-0.590389807280884	-0.354472447742723	0.658099969390258	0.781114518563891	0.651603582512142	0.700524504622841	0.808878298499913
ENSG00000053747	LAMA3	HLC	0.458476999199549	0.0102315911190849	0.160134832882227	-0.995913694759123	-0.721935289823162	-0.756992421233954	-0.426973621006476	-0.242459029513972	-0.273965466119614	0.126019968014558	1.56705559302548	1.09632053821539
IPO11;LRRC70	NA	HLC	-0.569353008946453	-0.569353008946453	-0.569353008946453	-0.569353008946453	-0.569353008946453	-0.330431735421284	-0.569353008946453	0.451229050480903	0.152595219693056	1.72968138235396	0.82922109256466	0.583823044007423
ENSG00000117500	TMED5	HLC	-0.554031894863215	-0.273503565929162	-0.603581365794962	-0.885305093240746	-0.936889363169152	-0.871197831746112	0.64578478353041	0.293930171857341	0.610041706649025	0.976699605337358	0.685071876660211	0.912980970709001
ENSG00000140367	UBE2Q2	HLC	-0.461647050871855	-1.51360284633817	-0.494309753149064	-0.472697312088876	-0.332189773829429	0.159067093103121	0.345108175489385	0.0585216566173825	-0.0483381449963742	1.39831533870532	0.96922376730647	0.392548850052095
CTD-2574D22.6;MVP	NA	HLC	-0.547091448811105	-0.43461005140084	-0.758999402695407	-0.758999402695407	-0.758999402695407	-0.758999402695407	0.216899730190877	0.681720115945208	0.336225494670976	0.601934016114428	0.847684923792976	1.33323483027911
ENSG00000102401	ARMCX3	HLC	-1.06497693003462	-0.851191538412589	-0.685628467151548	-0.124508361628403	-0.726962408814733	-0.63783144979161	0.391838498640527	0.669519210713625	0.603222565777233	0.910564958973109	0.631599961709361	0.884353960019639
ENSG00000108960	MMD	HLC	-0.606482759073158	-0.354238005022919	-0.620228334237885	-0.500229755234816	-0.289863501212764	0.120539190011996	-0.190962783100834	-0.741496683328382	-0.309470151392521	1.53131116202295	0.783126926047882	1.17799469452045
ENSG00000101680	LAMA1	HLC	-1.16066427564404	-1.13793892882554	-0.905589539889737	-0.175368188712807	-0.179295254632668	0.113676464695879	0.129507778274518	0.926772417875958	0.52456526123959	0.204304481305814	1.0849400355859	0.57508974872714
ENSG00000182985	CADM1	HLC	-0.604531748854683	-0.705152209491335	-0.539589138230294	0.0215309672928514	-1.17932351241552	-0.221376922014252	1.59733975232578	-0.116204735134311	0.50246429894544	0.16669038483617	0.213284051379412	0.864868811360749
RP5-877J2.1	NA	HLC	-0.553980930665853	-0.553980930665853	-0.553980930665853	-0.553980930665853	-0.553980930665853	-0.553980930665853	0.421918202220431	0.58364948568508	-0.553980930665853	0.281342128624271	1.05270339582253	1.53825330230866
ENSG00000181104	F2R	HLC	-0.708573127060164	-0.833664518011166	-0.910778269695968	-0.803273112249085	0.0245945373681122	-0.772852248561612	0.256817699870525	0.713578660502706	0.773708232628562	0.775544160203107	0.587091839238	0.897806145766985
ENSG00000185022	MAFF	HLC	-0.389524735872062	-0.949903892786021	-0.949903892786021	-0.283271732033719	-0.247323711873966	-0.506064001583238	1.18235483065314	0.815795065407247	-0.377444982694247	0.795449459365289	-0.0873894908536075	0.997227085057211
ENSG00000111816	FRK	HLC	-0.526600296522613	-0.414118899112349	-0.738508250406916	-0.738508250406916	-0.738508250406916	-0.294668359204132	0.814229452596339	-0.31314301774818	-0.0165600217674076	1.44073347899777	0.660065851104197	0.865586562877124
ENSG00000134324	LPIN1	HLC	-0.575270086784192	-0.129503957819944	-0.589015661948918	-0.658930173123605	-0.861670838762191	-0.512409933974789	0.417088459305103	-0.536932796168132	0.255854416456283	0.769277136298012	1.21230606971296	1.20920736680941
ENSG00000171617	ENC1	HLC	-0.648775518519041	-0.63591785396546	-0.947117684836363	0.13561031835891	-0.291838669491785	-0.442639441164385	1.85130924860355	-0.134243945472725	-0.0167086741359634	0.409197029647452	0.732057170479005	-0.0109319795031952
ENSG00000155011	DKK2	HLC	-0.422780465871032	-0.634688419755335	-0.428598148542307	-0.634688419755335	-0.634688419755335	-0.634688419755335	0.91804928324792	-0.634688419755335	0.346515320665475	1.27023796024083	0.520611755507085	0.969406393528705
ENSG00000140836	ZFHX3	HLC	-0.925378409556362	-0.820169409819816	-0.810847305235554	-0.511959564272904	-0.214279180375138	-0.242681748326793	-0.339834959738471	0.457270169873972	0.559951138044832	0.776844980435676	1.35902099924701	0.712063289723549
ENSG00000167657	DAPK3	HLC	-0.537700794197895	-0.815340004320322	-1.30124432632971	0.468157510536594	-0.269401057608083	0.370386456306907	-0.699133127111021	0.362628417118717	-0.145044015967035	0.520271753968598	0.843131894800151	1.2032872928031
LHFP	NA	HLC	-0.294875056255659	0.136694622204545	0.0830173258892017	-0.905614839976254	-1.2982685957926	-0.949007691005193	0.847534520160805	-0.13152748208794	0.274800471460976	0.726787390571855	0.522940743978435	0.987518590851827
ENSG00000099194	SCD	HLC	0.254035113194846	-0.198457558735559	0.187689314725288	-1.17083984273952	-1.08953459046997	-0.938599801600933	0.0885540898030115	0.12813154549434	0.0392499355064952	1.07099151892515	0.693779606749025	0.935000669147824
ENSG00000152217	SETBP1	HLC	-0.442264000396338	-0.509649989623417	-1.38365803233241	-0.0869993685652029	-0.79858633379022	-0.123452568939699	-0.193517175962666	0.739902779641375	0.516071479304335	0.282481584298751	1.26467755898149	0.734994067383996
ENSG00000113742	CPEB4	HLC	-0.455299704979885	-0.573652351125214	-0.95662434499451	-0.496082455455237	-0.888736211271578	-0.718874725004755	0.800981401184137	0.449625892045206	0.748011754687468	0.403195115956704	1.06438561862807	0.623070010329598
ENSG00000162614	NEXN	HLC	-0.926648315462537	0.28183152125467	-0.381877675367322	-0.649336466273999	-0.757064811915836	-1.01082391696683	0.910504540025114	0.131635731503079	0.14636432049015	1.22869607355133	0.31592561534481	0.710793383817375
C1ORF168	NA	HLC	-0.565551840796801	-0.565551840796801	-0.565551840796801	-0.565551840796801	-0.565551840796801	-0.326630567271633	-0.565551840796801	0.0331646067332176	0.994294164087885	0.269771218493323	1.04113248569158	1.38157913704643
ENSG00000062725	APPBP2	HLC	-0.498094378123129	-0.671938580481968	-1.13145028461094	-0.557250109849063	-0.259569725951298	-0.501269889364091	1.08770540192614	0.46893762427495	-0.286580206205741	0.731554434859517	1.07197179389666	0.545983919628964
ENSG00000175115	PACS1	HLC	-1.06288179874536	-0.593545226136766	-0.94835069442455	-0.525096877967016	-0.243107144361406	-0.284303508863152	0.774271056742293	-0.157956201720267	0.370282869952973	0.639341591246681	1.1453456580697	0.886000276206869
AC004381.6	NA	HLC	-0.502029440680032	-0.473346332511667	0.189776953728876	-0.39577643684169	0.110607164994054	-0.823487324068823	-1.06240859759399	-0.0418265381666361	0.329095062560442	1.54584888610658	1.032779147113	0.0907674553598836
CTC-432M15.3;FNIP1	NA	HLC	-0.825396617889599	-0.571652093962449	-0.473808888772856	-0.435191456184326	-0.373761831358513	-0.0847452475596975	0.518830123919242	0.189112093687869	0.39078400169381	-0.779017734196438	1.6895020614132	0.755345589209762
ENSG00000189056	RELN	HLC	-0.799708111641821	-0.799708111641821	-0.799708111641821	-0.322989041067275	-0.799708111641821	-0.355868220439037	1.16398790574985	0.729372372689927	0.0576836529527758	0.766201620522422	0.806976214846562	0.353467941312055
ENSG00000187231	SESTD1	HLC	-0.623385359497773	-1.30208784794762	-0.725074566400022	-0.130577278208789	-0.334465356650345	-0.647706362512503	1.04017394076362	0.634148574246701	0.120312193526328	0.554526166415685	0.526990249130887	0.887145647133837
ENSG00000104368	PLAT	HLC	-0.446717289701597	-0.446717289701597	-0.446717289701597	-0.446717289701597	-0.446717289701597	-0.446717289701597	-0.446717289701597	-0.0213520570428614	-0.446717289701597	0.914216129108238	1.34180690871186	1.33906733683554
ENSG00000080224	EPHA6	HLC	-1.29254134009283	-0.175149990969467	-0.813602132150284	-0.383615537466025	-0.331433531389091	-0.578032525698993	0.459246723414539	0.261249664216132	0.582008244364613	0.061460438187106	1.15509368998106	1.05531629760325
ENSG00000140416	TPM1	HLC	0.0409727724257962	0.0890701213595451	-0.0745932163958249	-1.0669378961798	-0.796983881094664	-1.38366512883221	0.399696493340245	-0.0230355005442089	0.837830386460724	0.341563283578717	0.836212444665498	0.799870121216179
ENSG00000101493	ZNF516	HLC	-1.13261227107726	-0.531896313997362	-0.797886643212328	-0.0993203929555668	0.0739939154473159	0.141472976148297	-0.775580151208915	0.421178733231707	-0.249295327595179	0.834721504443125	1.00343508844955	1.11178888232662
ENSG00000170873	MTSS1	HLC	-0.400342316482401	-0.796981690920263	-0.25034810917103	-0.796981690920263	-0.292844240289972	0.129435077357881	-0.228041617167616	0.448909259858874	0.403909187816743	-0.796981690920263	1.43011854391534	1.15014928692297
FAM65B	NA	HLC	0.448273624582533	-0.498033753960034	0.42016247977334	-0.420463858290057	-0.582958568412068	-1.08709601904236	-1.08709601904236	0.259495544478248	-0.105892278621549	1.09214571036233	0.701428179371101	0.860034958800874
ENSG00000079112	CDH17	HLC	-0.691754024045396	-0.691754024045396	-0.485663752832368	-0.691754024045396	-0.691754024045396	-0.247914132842612	1.27194199334628	-0.26638879138666	0.0301942045941126	1.05359932810591	0.706820077465717	0.704427169731199
ENSG00000104388	RAB2A	HLC	-0.496895517826968	-0.724027233303686	-1.62633048346151	0.0908084183188871	-0.594487214739881	0.0453002991751097	0.44861162299795	0.0851094183843113	0.619494408359033	0.693299454592324	0.518045737668354	0.941071089836078
ENSG00000089876	DHX32	HLC	-0.916054222401315	-0.750750425059372	-0.934949695389118	-0.0998664554379483	-0.724309665375541	-0.0164303732687867	0.787672055777725	-0.144555202684835	0.67164961641458	1.32213025860364	0.338292033769412	0.46717207505156
ENSG00000099940	SNAP29	HLC	-0.712684833927684	-0.857535713002331	-0.815932616462502	-0.838664762454017	-0.170837089603702	-0.461746962121015	0.000422533946125014	0.44281597628071	0.781296519730026	0.917406373546954	0.792431526312148	0.923029047755291
ENSG00000109787	KLF3	HLC	-1.07008985752947	-0.289977748131091	-0.524611364897919	-0.345895475456224	-0.764149051055281	-0.289915254971252	0.306071342069025	-0.12013766844673	-0.0752255718129016	0.71251249743735	1.09624005581727	1.36517809697722
ENSG00000164023	SGMS2	HLC	-0.32275798136403	-0.534665935248333	-0.534665935248333	-0.534665935248333	-0.534665935248333	-0.534665935248333	1.59759278819083	0.602964481102601	-0.534665935248333	0.300657124041792	-0.0398896785169058	1.06942887803571
ENSG00000134108	ARL8B	HLC	-0.136491451148535	-0.781141452035046	-1.55754264872045	0.262294852750709	0.00392785881122393	-0.291679220443303	0.796266542819125	-0.158326319889311	-0.21816408132882	1.28610305003411	0.586833572409419	0.207919296740882
ENSG00000170430	MGMT	HLC	-0.6454740328346	-0.616790924666235	-0.383907174200099	-0.729134119174013	-0.503273008836504	0.0815479162505546	-0.636913115995913	0.941168300886565	0.641194282440972	0.360056542415683	1.54420247050828	-0.0526771367946841
ENSG00000115993	TRAK2	HLC	-0.385647972690043	-0.496988477218339	-0.698671601335741	-0.380046789031504	-0.678740534539834	-0.630032393542798	0.213851420737921	-0.440231141958171	1.24078541334261	1.00113400274949	0.14202521325967	1.11256286022674
ENSG00000108551	RASD1	HLC	-0.557112056105081	-0.444630658694817	-0.769020009989384	-0.769020009989384	-0.769020009989384	-0.530098736464215	0.523938351056161	0.577571553531222	-0.0470717813498753	0.976333342161927	1.18096883204562	0.627161183787211
ENSG00000135862	LAMC1	HLC	-0.587506822002965	-0.680184670940309	-0.917939153082916	-0.580605318206445	-0.496146752441786	-0.267890026529474	0.548402346192329	-0.048501353401293	-0.101166175276944	0.925418021445179	1.15802406007352	1.04809584417111
ENSG00000166557	TMED3	HLC	-0.943216330157788	-0.749309444729607	-0.655632068181134	-0.524772121558795	-0.557207608101391	-0.632688475566582	0.778152333164218	0.639888774555091	0.401927146517301	1.09734103367997	0.519555463874768	0.625961296503953
ENSG00000147155	EBP	HLC	-0.685539082608153	-0.486021495277867	-0.66478668016951	-0.999714939489177	-0.556081805565727	-0.59891212262756	0.301016189413749	0.351283892457149	0.681432177428828	0.79085269662873	0.796964628719024	1.06950654109051
BCL2L2;BCL2L2-PABPN1	NA	HLC	-0.165822140835097	-0.916987568621049	-0.854990221615064	1.05603577212601	-0.737239469285326	-0.184335918408232	-0.265477787029332	0.10521464360499	-0.0404860411786103	-0.119443257141936	0.708611922119384	1.41492006626426
ENSG00000131507	NDFIP1	HLC	-1.30770835181648	-0.657519270354141	-1.06085892597238	-0.369628690616465	-0.0988516419226286	-0.186846896369199	0.518713592322718	0.283334776133241	0.743010698264369	0.609962507035434	0.745990145828459	0.780402057467078
ENSG00000103888	CEMIP	HLC	-0.811392982624536	-0.487003631329968	-0.425006284323983	-0.811392982624536	-0.537414577688575	-0.572471709099367	0.164506150261749	0.434497968154601	0.169810757796274	0.754516749539707	1.53656233078657	0.584788211152059
ENSG00000258667	HIF1A-AS2	HLC	-0.0971391764776084	0.190119693797598	-0.335010797645238	-1.01916739418374	-1.27712866471465	0.0102724412844597	0.0158296963308904	-0.383936497242351	0.0222143523710181	1.02190572658576	0.672860177320346	1.17918044257353
ENSG00000020577	SAMD4A	HLC	-0.199079622840769	-1.08360501269707	-0.829745748278927	-0.299073547293219	0.176691847213897	0.305930353041059	1.54157114537652	-0.0581844104294529	-0.702322593995923	0.19535316799584	0.909059630324598	0.0434047915834448
ENSG00000138079	SLC3A1	HLC	-0.699558449714025	-0.699558449714025	-0.699558449714025	-0.441597179183114	-0.699558449714025	-0.699558449714025	0.276340683172259	0.438071966636908	0.860287555170661	0.661374969095811	0.455741725548395	1.24757252812921
AP002884.2;BCO2	NA	HLC	-0.533758506021099	-0.533758506021099	-0.147371807720547	-0.533758506021099	-0.533758506021099	-0.533758506021099	1.59850021741806	-0.533758506021099	-0.316711502533751	0.827174912788736	0.621541669241321	0.619417546932776
ENSG00000115504	EHBP1	HLC	0.0661706585370494	-0.277056688771728	0.215787503682826	-0.799500491318279	-1.03801560640903	-0.970536545708052	-0.492833729426235	0.94967329634119	0.136324619008803	0.750534356083022	1.08407504585379	0.37537758212665
ENSG00000197965	MPZL1	HLC	-0.422896604855319	-0.584370991993628	-0.532554881974079	-0.292981427439575	-0.667970642279346	-1.0457068975164	0.752576574609843	-0.0430190093603375	-0.0225244389648811	1.18320941131867	0.752722243610284	0.923516664844768
ENSG00000145901	TNIP1	HLC	-0.874289227991676	-1.4652164511464	-0.802093164905855	-0.0772496410810577	-0.00567156225222121	0.405873703386677	-0.281478142192362	0.753275603476905	0.41713127099128	0.728533251699221	0.508690571555884	0.692493788459606
ENSG00000071553	ATP6AP1	HLC	-0.903490088914232	-0.629843143510065	-0.88273768647559	-0.355035219095123	-0.530800344090391	-0.703883872479437	0.453716757072812	0.578223421589636	0.506447619696384	1.02944301174972	0.812633810952961	0.625325733503326
ENSG00000164442	CITED2	HLC	-0.349315919212568	-0.56122387309687	-0.56122387309687	-0.303262602565959	-0.56122387309687	-0.322302599571702	0.00771620065577627	0.0374925744331485	-0.56122387309687	1.48737020506688	0.301290528835544	1.38590710474636
AP000320.7;LINC00310	NA	HLC	-0.167494894953208	-0.0622858952166614	-0.488523107880308	-0.398190735606315	-0.600931401244901	-0.431069914978077	1.08878621121081	-0.121455140935711	-0.469239825849974	0.247023856592819	1.78463317777733	-0.381252328915815
ENSG00000127125	PPCS	HLC	-0.882929834573953	-1.05316231711764	-1.22750843556585	0.228869862659812	0.582886549312509	0.100431067585428	-0.52343406686962	0.272605050523695	0.790322660445458	0.575322548621564	0.439603015137606	0.696993899840991
ENSG00000136111	TBC1D4	HLC	0.700778800135798	0.696188705458895	0.568931361633669	-1.08471089264137	-0.684431548441559	-0.938190653492551	-0.268471602170368	-0.540847903788557	-0.26208694613024	0.183923388935397	1.09811302074228	0.530804269758604
ENSG00000072778	ACADVL	HLC	-0.529413976858908	-1.60496875593943	-0.914121594112575	0.052060499560203	-0.303988142505327	0.283199408709808	0.678202297679336	0.700562022239098	-0.0451227510547421	0.574272973465258	0.490218988767563	0.619099030049711
ENSG00000071537	SEL1L	HLC	-1.00996114902558	-1.2451059569135	-1.10185601004691	0.156268905669812	0.240727471434472	-0.235212911100807	0.586417803183968	0.428632379725981	0.309686178107047	0.805971547185442	0.586557212825097	0.477874528954978
ENSG00000137710	RDX	HLC	-0.537148326528183	-0.982367453271677	-1.03942307018564	-0.0785613561056113	-0.119340428739292	0.108916297173019	1.42042971233517	-0.437572998498824	0.0666713994598407	0.93668699310042	0.543902602479563	0.117806628781214
ENSG00000198959	TGM2	HLC	-0.737558257618949	-0.737558257618949	-0.737558257618949	-0.737558257618949	-0.737558257618949	-0.293718366416165	0.815179445384306	0.609033305901657	0.463332621118057	0.384375405154731	1.05096594079451	0.658622936157646
ENSG00000122870	BICC1	HLC	-0.186850164799192	0.544986031195216	-0.308173581630739	-0.987503038697542	-0.960084658641798	-0.537805340993945	0.668036614167071	-0.117630545751482	0.446504261622918	1.04814113285308	-0.601707707339675	0.992086998016092
RP11-186B7.4;CD68	NA	HLC	-0.584079157928834	-0.584079157928834	-0.377988886715806	-0.584079157928834	-0.584079157928834	-0.584079157928834	-0.584079157928834	0.856640360711781	0.273312606665762	1.16127419422248	0.571221017333586	1.02001565535521
ENSG00000231607	DLEU2	HLC	-0.0223292773902308	-0.091738770592543	-0.551250474721517	-0.263455356156752	-1.09788405647075	-0.315106664656196	-0.528943982718104	-0.672518823812014	0.612697665238063	0.807042323525413	0.997303688236241	1.12618372951839
ENSG00000127472	PLA2G5	HLC	-0.395668522245539	-0.395668522245539	-0.395668522245539	-0.395668522245539	-0.395668522245539	-0.395668522245539	-0.395668522245539	-0.395668522245539	-0.395668522245539	1.34968482990577	1.00290557926557	1.2084262910385
ENSG00000113739	STC2	HLC	-0.313525689643109	-0.382935182845421	-0.336035548955495	-0.404353708307438	-0.686500287811573	-0.462663700445485	-0.413181335837344	0.301976055773967	-0.66713224008412	1.12328277340154	1.07038374189773	1.17068512285675
ENSG00000170396	ZNF804A	HLC	-0.774027971290241	-0.774027971290241	-0.774027971290241	0.0604007290237578	-0.26989052065995	-0.330188080087457	1.50914308232852	-0.0205733060450908	-0.368357990959354	0.347905691483439	1.01449622712322	0.379148081663635
ENSG00000067208	EVI5	HLC	-0.50764319150618	-0.863191662826568	-0.94030541451137	-0.726731025048445	-0.297658267832558	-0.107753489028112	0.934305675705678	0.343754456731783	-0.281764594939231	0.886535003706977	0.557564694422598	1.00288781512543
ENSG00000170786	SDR16C5	HLC	-0.571706298501241	-0.247316947206674	-0.571706298501241	-0.31374502797033	-0.571706298501241	-0.127866407298457	-0.00276622474859423	-0.571706298501241	-0.166036318170354	1.33322008149492	0.290808103431173	1.52052793447328
ENSG00000102805	CLN5	HLC	-0.763389068957833	-0.511144314907593	-0.77713464412256	-0.657136065119491	-0.291182180309755	-0.0363671198726783	-0.754828152119146	0.512900537721584	0.816811354054192	0.975266165428618	1.02418708753932	0.462016400665344
ENSG00000142871	CYR61	HLC	0.469593186533768	-0.626192322711966	0.127059967302995	0.0299452442117043	-0.338256173019936	-0.288837819516147	1.64960171991147	-0.46179992254914	-0.998207584306942	-0.379931528504166	-0.0599544125318703	0.876979645180227
ENSG00000100100	PIK3IP1	HLC	-0.661247559573549	-0.661247559573549	-0.274860861272996	-0.661247559573549	-0.661247559573549	-0.661247559573549	0.631710801471996	0.0922071056716014	-0.0887886494817747	1.08410579257776	0.737326541937565	1.12453706696359
ENSG00000164849	GPR146	HLC	-0.724151626998249	-0.724151626998249	-0.724151626998249	-0.724151626998249	-0.021571446086194	-0.724151626998249	-0.155211553245603	0.716567891642366	0.476739251738757	0.841758105165993	0.882532699490134	0.879943186285791
ENSG00000149131	SERPING1	HLC	-0.617493036668034	-0.485916950344953	-0.405932818636195	-0.816176446249419	-0.642974080556064	-0.78190785141678	1.07095589601073	0.70643105928449	0.0281163059728184	1.03313200096368	0.600011731263578	0.311754190376146
ENSG00000145675	PIK3R1	HLC	-1.19795582890454	-0.736451774918355	-1.14508802404752	0.247021313667442	0.668559175246839	0.0664881458825795	-0.107778756147911	0.082754291043587	0.401779375750448	0.976627637050631	0.836625376659632	-0.092580931282833
ENSG00000196739	COL27A1	HLC	-0.532196179597459	-0.967488474504682	-0.717097450143664	-0.318356647220991	-0.17047218116544	-0.483713187027599	0.138931095277838	0.392005464225094	0.48692562968514	-0.239313578344763	0.919925450857582	1.49085005795894
METAZOA_SRP	NA	HLC	-1.27154387838979	-0.641359558619327	-0.807367462406743	0.417693755747268	0.139208260348771	0.272106834890512	-0.270813953212329	-0.203745956294721	-0.323783599708999	0.775967129276683	0.829655438594504	1.08398298977417
ENSG00000119522	DENND1A	HLC	-0.201284125290238	-0.312624629818533	-0.051596938032993	-0.661875543981883	-0.603052112342756	-0.0648556626476373	-1.45262617899899	0.983780705472881	0.57128811307508	0.388072048468058	0.437897957869724	0.966876366227283
ENSG00000090615	GOLGA3	HLC	-0.935173965508563	-0.938411969909364	-1.06211853397748	-0.211728793125178	0.199131078575686	-0.226995289096373	1.08934764815918	0.333172359911183	-0.0287059154038598	0.183870937554802	0.8004789142971	0.797133528522863
ENSG00000159674	SPON2	HLC	-0.507503053883314	-0.507503053883314	-0.507503053883314	-0.507503053883314	-0.507503053883314	-0.507503053883314	0.785455307162231	-0.279200020758312	-0.507503053883314	1.05840667828093	1.09918127260507	0.888678139893281
POLD4;AP003419.11	NA	HLC	-0.923460243878572	-0.810978846468308	-1.13536819776288	-0.468736037010573	-0.102782152200837	-0.0783271962554908	0.637432376273486	0.00226221858805831	0.501813417583298	0.913225880400874	0.653156000650585	0.811762780080357
ENSG00000122545		HLC	-0.389788685912366	-0.25560408502975	-0.789796533658603	-0.572821574837494	-0.76429778642446	-0.75861028191327	0.885430200572095	-0.0441759480090376	0.114144840612044	1.19153771557857	0.462835844909437	0.921146294112839
ENSG00000084676	NCOA1	HLC	-1.20136993490324	-0.315634434146217	-0.656599294808028	-0.549094137361144	-0.186094415582412	-0.518673273673672	-0.135984272094535	0.49350221754178	0.283959612697953	0.699472637569681	1.00685752191181	1.07965777284802
ENSG00000088298	EDEM2	HLC	-0.170784024228907	-1.21498931682294	-0.287193116794638	-0.418544911606394	-0.366362905529459	-0.612961899839362	-0.563479535231221	0.429543598887482	1.01411929060216	0.759655723182905	0.410610173917495	1.02038692346288
ENSG00000177311	ZBTB38	HLC	-0.872557086334645	-0.76007568892438	-0.537831458469714	0.160734791787047	-0.580327589588657	-0.301687648404394	0.879230977172728	-0.485748592688929	0.393663800381241	0.660888311932363	1.37499917040241	0.0687110127349282
ENSG00000197879	MYO1C	HLC	-0.411440870450015	-0.764474639399159	-0.979537446588544	-0.574693742411781	-0.336890299909732	-0.745729796801553	0.188058522977949	0.804105172480335	0.735221074512583	0.631036302330104	0.427819986046782	1.02652573721303
ENSG00000173230	GOLGB1	HLC	-0.965342312933916	-1.10387314853228	-1.0301076447047	-0.0619519005534084	-0.264855599267819	0.0212310236833364	0.971547715655788	0.493925991047066	0.386958208861341	0.800780308297908	0.269510477787293	0.482176880659393
HOXB3;HOXB6	NA	HLC	-0.594269424729498	-0.594269424729498	-0.594269424729498	-0.594269424729498	-0.594269424729498	-0.594269424729498	1.17853114930686	0.159185240515652	-0.0218105146377243	0.971640307434744	0.268244977202916	1.00982538855454
ENSG00000095596	CYP26A1	Defintive_endoderm	-2.36354654009251	-2.43579656323581	-2.21355233278114	3.17307564244654	3.4773200093287	3.34250032704589	-2.76018591453038	0.363402435784155	1.81824738752613	-1.01483256237907	-0.412230601119266	-0.974401287993239
RP11-758I14.3;PLSCR2	NA	Defintive_endoderm	-1.5855250643419	-1.5855250643419	-1.5855250643419	3.44647024551426	3.95648503450543	3.52301819360769	-1.01658499058926	-0.44789464799097	0.0516565510042692	-1.5855250643419	-1.5855250643419	-1.5855250643419
ENSG00000147869	CER1	Defintive_endoderm	-0.758667322101806	-1.2751194593435	-0.908661648811217	3.71395341616811	3.39834183746114	3.91925845282565	-1.03056873688542	-1.37120577751307	-1.38246180715072	-1.59950881063807	-1.59950881063807	-1.10585133337302
ENSG00000111879	FAM184A	Defintive_endoderm	-1.81846463462942	-2.07024385808336	-1.50325759552433	3.49230908970804	3.70446975868778	3.53138730189093	-1.6834069902794	-0.968249598668085	-0.518726543239697	-1.29837270435585	-0.432205888330077	-0.435238337176542
ENSG00000178568	ERBB4	Defintive_endoderm	-2.85578153050013	-1.84963624462192	-2.03383551495166	2.52023279491572	2.48503001936573	2.52011761001822	-1.08298095646377	-0.36282142717028	0.633269959093677	-0.0729695625721822	0.208383878698383	-0.109009025811797
ENSG00000164292	RHOBTB3	Defintive_endoderm	-2.19669774644892	-2.16801463828055	-2.75707690336287	1.6990250297756	1.87761415246833	1.78726214544592	0.369719738177041	0.501865690293624	0.710961886592263	-0.577835173958189	0.678345393716069	0.0748304255816858
ENSG00000137198	GMPR	Defintive_endoderm	-1.04804696770995	-1.25995492159425	-1.05386465038122	2.43415073210145	2.72634386522834	2.38701832357784	-0.691014847841605	-0.834589688935516	-0.278751181173442	-1.25995492159425	0.138619179916862	-1.25995492159425
ENSG00000136574	GATA4	Defintive_endoderm	-2.15097999515092	-2.15097999515092	-2.15097999515092	1.2805607002454	1.31350579066219	1.96920644012377	-0.598242292147662	1.65953224893295	0.402517963568749	-0.246053615154753	0.0761202396846876	0.595792509537412
ENSG00000171587	DSCAM	Defintive_endoderm	-0.820980158384501	-0.893230181527796	-1.21761953282236	2.45449593131595	1.97715551845871	2.62315948474946	-0.648679459069716	-1.21761953282236	-0.236415792401553	-0.740327387113515	-0.062319357559943	-1.21761953282236
ENSG00000113532	ST8SIA4	Defintive_endoderm	-1.38860515856498	-1.38860515856498	-1.18251488735196	2.4896433244069	2.25554723986047	1.95985491626429	-1.38860515856498	-0.142714207785848	0.458442313624547	-0.911313012856137	-0.233304983302565	-0.527825227164744
ENSG00000139263	LRIG3	Defintive_endoderm	-1.1349629335493	-1.651415070791	-1.28495726025871	2.22779650345128	2.27104686414832	2.28656140690746	-0.682846061040021	-0.95522236265821	-0.77491354334856	-0.230451069934255	0.119383322621426	-0.190019795548429
ENSG00000090530	P3H2	Defintive_endoderm	-1.98875290307698	-1.98889059612803	-1.9777552775414	1.58382962666414	2.01529228291269	1.78674310817221	-0.108376945433156	0.435085031656878	0.735574643746857	-0.421236287000253	-0.04227565412614	-0.0292370298468203
ENSG00000170961	HAS2	Defintive_endoderm	-1.27802847306394	-1.06424308144192	-0.657835997852354	2.30248877481834	1.85523299150054	1.99403429309655	-1.26509543239188	-1.81562933261943	-0.94165154819249	0.69751341594378	0.321974722506444	-0.148760332303645
RP11-114G22.1	NA	Defintive_endoderm	-1.35214647967565	-1.15972358903119	-1.05793869228666	2.34330239795351	1.74277755279371	2.4862430042612	-0.455827493067971	-0.855593686641212	-0.449442837027843	-0.00343250196220568	-0.350211752602403	-0.888005922713275
RP11-494M8.4	NA	Defintive_endoderm	-0.205617693189123	0.311977939715035	-0.125123944628293	2.01314629459178	2.09889073241234	2.14185930492374	-0.712232398516996	-1.28117247226964	-0.875502491938756	-0.803880326560795	-1.28117247226964	-1.28117247226964
ENSG00000076356	PLXNA2	Defintive_endoderm	-1.33041768942988	-1.89079684634384	-1.50441014804329	1.92864404120305	1.48926635833814	2.03792267420228	-0.338059143340584	-0.450077327703224	-0.689905967606833	-0.529863427534003	0.944426536612879	0.3332709396453
LEFTY1;RP4-559A3.7	NA	Defintive_endoderm	0.0576148039069699	-0.309750773365877	0.460783883095733	1.85079009119853	2.10498180628997	2.09253614914629	-1.12237468433008	-1.12237468433008	-1.12237468433008	-0.645082538621228	-1.12237468433008	-1.12237468433008
ENSG00000106853	PTGR1	Defintive_endoderm	-1.94821200497029	-1.88309029532401	-1.9800164448282	0.698839272203604	1.59695197177125	0.695910851598304	-0.0795230464102152	1.0379880058746	1.71928217189452	0.297814146865131	-0.118073454579603	-0.0378711740950823
ENSG00000158270	COLEC12	Defintive_endoderm	-1.38118221323951	-1.63296143669345	-2.22202370177577	1.53611021531115	0.681644139603207	1.36133971849433	-0.669285998772519	-0.131960211117786	-0.662177696891088	0.56078826615217	1.46323966032686	1.0964692586024
ENSG00000163508	EOMES	Defintive_endoderm	-0.768149843937229	-0.768149843937229	-0.768149843937229	2.24054446068472	2.00918615259705	2.16996050488825	-0.768149843937229	-0.768149843937229	-0.768149843937229	-0.768149843937229	-0.768149843937229	-0.274492366672182
ENSG00000104321	TRPA1	Defintive_endoderm	-0.497959727476291	-0.305536836831829	-0.0726530863656922	2.0047687346165	2.1619523786424	2.07702314889983	-0.894599101914153	-0.894599101914153	-0.894599101914153	-0.894599101914153	-0.894599101914153	-0.894599101914153
STEAP1B;AC002480.5	NA	Defintive_endoderm	-1.03114588582574	-1.03114588582574	-0.644759187525188	1.94201888970286	1.50743306576761	2.15550481036462	-1.03114588582574	-1.03114588582574	-0.814098882338393	0.090787776947939	0.918842956209259	-1.03114588582574
ENSG00000142173	COL6A2	Defintive_endoderm	-1.36887153373501	-2.20971302227127	-2.00362275105824	0.349703504264247	1.86876495431679	0.152764922192202	-0.0774542988321123	1.43270742805029	0.129082014961148	0.398544461429305	0.625510360685446	0.702583959997201
ENSG00000053524	MCF2L2	Defintive_endoderm	0.509839175897471	-0.104947951915885	-0.0919326998262693	1.99729344047276	1.29839414653508	2.08257183923271	-1.43424725492355	-0.296616838572621	-0.134904237837882	-0.956955109214707	-1.43424725492355	-1.43424725492355
ENSG00000152256	PDK1	Defintive_endoderm	-0.846946227690524	-0.685205100817825	-0.631130534044044	1.35200606486934	2.10468508360336	0.938243454557645	-2.60109984876268	0.0180047446882172	0.0300657392633816	-0.421858119357998	0.148955811494151	0.594278932196983
ENSG00000101825	MXRA5	Defintive_endoderm	-1.69272157626803	-1.36833222497347	-1.69272157626803	1.31597272835391	1.32710087309853	1.40566726578982	-0.139983873264778	-0.0803810680152881	-0.711517835847223	0.486520153136654	1.0573340839888	0.0930630502691039
ENSG00000182732	RGS6	Defintive_endoderm	0.21460068047419	0.0895092895231873	-0.54894285165763	1.58180154672102	1.53754598304979	2.10867006134479	-1.23979001348448	-0.219207954057126	-0.667331103392708	-1.23979001348448	-0.377275611552068	-1.23979001348448
ENSG00000040933	INPP4A	Defintive_endoderm	-0.170927434418291	-0.325480769242056	-0.610751765239089	1.50462205173431	1.51178483980238	1.99383552625039	-1.35878977682308	-1.19705849335843	-0.774842904824675	-1.21275524693568	0.228280378075246	0.412083594978967
ENSG00000145642	FAM159B	Defintive_endoderm	-0.396625232337132	-0.144380478286892	-0.135058373702631	1.55368027404692	1.94666345212789	1.94679707068451	-0.957004389251092	-0.957004389251092	-0.957004389251092	-0.479712243542244	-0.957004389251092	-0.463346911986045
ENSG00000135919	SERPINE2	Defintive_endoderm	-1.44855042992126	-1.68369523780918	-1.66869971627201	1.31117398866413	1.20514880415474	1.36843251871455	-0.527780553036521	-0.326958181699084	-0.0575380122514071	0.667854227784019	0.619644100971803	0.540968490700228
AC226119.5	NA	Defintive_endoderm	0.110488849911724	0.491013954231692	-0.0825662386158821	1.81067333020159	0.948837437239609	1.87163347775365	-1.42488079371317	-0.531688626240864	-1.01921081338228	-1.42488079371317	0.181803532775215	-0.931223316448121
ENSG00000143768	LEFTY2	Defintive_endoderm	-0.765145756268824	0.0474781546953755	-0.378759057968271	1.64284030733843	1.87372497385192	1.95368891247697	-0.765145756268824	-0.765145756268824	-0.548098752781476	-0.765145756268824	-0.765145756268824	-0.765145756268824
AL163953.3	NA	Defintive_endoderm	-0.627012905903412	-0.77735508715343	-0.899131836290777	1.94265408983741	1.31368884326135	1.80862133721245	-1.02103892436498	-0.0608985137858817	-0.732587233523033	-1.11268685240878	-0.191404896606516	0.357151979725602
ENSG00000112541	PDE10A	Defintive_endoderm	-1.10869535266405	-0.85645059861381	-1.28268781127746	1.91156677732662	1.23459333180097	1.84774458457825	-0.116336806574755	0.021982014919586	-0.947126280938501	-0.308141090768174	0.11944968883545	-0.515898456624134
ENSG00000087008	ACOX3	Defintive_endoderm	-1.35276216926627	-1.0283728179717	-0.806128587517037	1.42831020523933	1.96814352884378	1.51589458124328	-0.376863036379986	-0.332180109838914	0.557964201628737	-0.517439109976146	-0.19746199400385	-0.859104692001224
ENSG00000182095	TNRC18	Defintive_endoderm	-1.04841827567151	-1.3196449342662	-1.50384420459595	1.25485106676022	0.964601480797152	1.55081078121203	-0.773052517141152	0.252479568689353	-0.185210640218423	-0.964856801334571	1.10963207693454	0.66265239883451
ENSG00000158815	FGF17	Defintive_endoderm	-0.59859017134707	-0.59859017134707	-0.59859017134707	2.26241358239954	1.52116480060903	1.60373315911506	-0.59859017134707	-0.59859017134707	-0.59859017134707	-0.59859017134707	-0.59859017134707	-0.59859017134707
ENSG00000170542	SERPINB9	Defintive_endoderm	-0.554920813155061	-1.27766654581575	-1.3994432949531	1.58182500735836	1.00207815211939	1.47123079353952	-0.797332095734407	-1.19709828930765	-0.612161616179764	0.84821752444199	0.569252527178242	0.366018650508229
ENSG00000134363	FST	Defintive_endoderm	-1.46682706341978	-1.91507247150025	-1.41395925856276	0.898223130168432	1.08399406757072	0.825910314594588	0.427189317210994	-0.831154266720466	0.215120464301416	0.707756402535392	0.619387035293245	0.849432328528459
ENSG00000165175	MID1IP1	Defintive_endoderm	0.321003320635855	-0.279077736361229	-0.735833807971462	0.571397167241189	0.442771466874034	0.518597446200188	-1.98801935929433	1.71263509363396	1.39276752018588	-0.422109627130087	-1.4932431025629	-0.0408883814510972
ENSG00000085871	MGST2	Defintive_endoderm	-0.89105838495251	-1.28769775939037	-1.28769775939037	1.45168445028503	0.239491806221233	1.17245466022503	-1.28769775939037	1.16063805426642	0.955391039369562	0.457655592760938	0.110876342120741	-0.794040282125326
ENSG00000125735	TNFSF14	Defintive_endoderm	-0.722118951174513	-0.722118951174513	-0.722118951174513	1.83729757536101	1.65159927977826	1.58892453593271	0.253780181711772	-0.49381591804951	-0.505071947687164	-0.722118951174513	-0.722118951174513	-0.722118951174513
ENSG00000174640	SLCO2A1	Defintive_endoderm	-1.09125081329426	-0.766861461999695	-1.09125081329426	1.14752571754236	1.09630754509269	1.36890160632114	-1.09125081329426	1.26346909198102	0.54593080205191	-1.09125081329426	0.307323288216851	-0.597593336029216
CTD-2311M21.2	NA	Defintive_endoderm	-0.450856199569313	-0.338374802159048	-0.662764153453615	1.16311915766632	1.92683200946502	1.8438526520409	-0.662764153453615	-0.662764153453615	-0.662764153453615	-0.662764153453615	-0.167987896722189	-0.662764153453615
ENSG00000104332	SFRP1	Defintive_endoderm	-1.20494503828809	0.115994381717707	-0.380120081202954	1.45844522733813	1.49148914033556	1.57213070705821	-1.1355986775333	-1.06404982587678	-0.60996807085275	-0.151710127538943	-0.354604321953551	0.262936686796761
RP11-114G22.1;RP11-153K16.1	NA	Defintive_endoderm	-0.59136025871437	-0.803268212598673	-0.41688151429812	1.70741645069934	1.31648675935742	1.83438570548939	-0.803268212598673	-0.57496517947367	-0.230809302506898	-0.325976066889825	-0.308491955867246	-0.803268212598673
ENSG00000108950	FAM20A	Defintive_endoderm	-0.75403001649719	-1.15066939093505	-0.764282692634499	1.50153433541622	1.33502191115356	1.44461427649477	-1.15066939093505	-0.725304158276316	-0.0554444935686691	-0.0287357281613718	0.637854807478408	-0.289889459534811
ENSG00000108018	SORCS1	Defintive_endoderm	0.136253008180113	-0.328495025328584	-0.0880740165246503	1.59826327338262	1.59152246516585	1.41051236712789	-1.14111893629278	-0.542402488762765	-0.56866002620101	-1.14111893629278	-0.646342679561357	-0.280339004892543
RP11-35J10.5;RP11-494M8.4	NA	Defintive_endoderm	0.42460165650902	-0.152800480726896	-0.507605949014679	1.67914234005881	0.984742567758154	1.53910478594641	-0.353652831676856	-1.10124893143814	-0.607603735923632	-0.852259818854292	0.277132361925243	-1.32955196456314
ENSG00000109339	MAPK10	Defintive_endoderm	-1.32725697289185	-0.533019640897948	-0.286979375453287	1.60349484394436	1.40426931712555	1.25652476410155	-1.53916492677615	-0.0984454081355395	0.0206810781085309	0.0267448053880877	-0.383864751513735	-0.14298373299956
ENSG00000231689	LINC01090	Defintive_endoderm	0.456308325613261	0.467308900726127	-0.154110088778582	1.31181562549567	1.09504868688618	1.51697134052841	-0.773433718696154	-0.229723316148323	-0.971167182375316	-1.58909993403285	-0.459707753253316	-0.670210885965104
ENSG00000121966	CXCR4	Defintive_endoderm	-0.521966649724227	-0.73387460360853	-0.73387460360853	1.8726813475551	1.31473255036797	1.22283598649547	-0.73387460360853	-0.73387460360853	-0.73387460360853	0.388059059165151	-0.73387460360853	0.126905327791711
ENSG00000087088	BAX	Defintive_endoderm	-0.0504444003770885	-0.395601416332173	0.431581457534861	1.24497533878517	1.21500593647521	1.48937431895114	-1.11185119575393	-0.500499093119891	-1.20391867806247	-1.2828758940258	-0.177709321963873	0.341962947888851
ENSG00000163251	FZD5	Defintive_endoderm	-0.215406681325391	-0.390298779701598	0.203210812892163	1.50565838991466	0.948370325142663	1.73265207996819	-1.01703413474453	-1.04069135341603	-1.17826817759335	-0.160133536528089	-0.474584093040789	0.0865251484320995
ENSG00000139292	LGR5	Defintive_endoderm	-0.585852211732088	-0.585852211732088	-0.37976194051906	2.11059915356062	1.04239681727779	1.4362915178285	-0.585852211732088	-0.585852211732088	-0.585852211732088	-0.10856006602324	-0.585852211732088	-0.585852211732088
ENSG00000110148	CCKBR	Defintive_endoderm	-1.1664860903504	-1.1664860903504	-1.1664860903504	1.07229044048623	1.31920521173822	1.24565553814141	-0.190586957464112	0.73782437332919	0.613941456829944	-0.689193944641548	-0.303971688417982	-0.305706158950155
ENSG00000141448	GATA6	Defintive_endoderm	-1.18369185704011	-1.18369185704011	-1.18369185704011	1.63789970316539	0.444557171969767	1.41159181038971	-0.207792724153831	-0.163109797612759	-0.202488116619305	-0.34836879774999	0.766296984994885	0.21248933673648
ENSG00000155816	FMN2	Defintive_endoderm	-0.450653214592637	-1.0110323715066	-1.0110323715066	1.34272609007871	1.0375747824699	1.82160210609353	-0.0351332386203129	-0.782729338381595	0.288310645579076	-0.533740225797749	-0.148517969574183	-0.517374894241551
ENSG00000269113	TRABD2B	Defintive_endoderm	-0.869120506509286	-0.987473152654614	-0.523490497968806	1.03002053342669	0.472071736239562	1.21915427314077	1.18925385054937	0.327775045942647	0.0606461976092336	-1.57653541773694	0.373453424298061	-0.715755486336698
ENSG00000242575		Defintive_endoderm	-1.06535550343714	-1.7727704146648	-1.08192325283794	1.33754607085162	0.91374736715071	0.538273072442426	0.190925602726879	0.629516649007878	0.698639572555206	-0.0274170625134866	-0.374196313153684	0.0130142118723393
AL035610.2	NA	Defintive_endoderm	-1.03773065222843	-1.43437002666629	-1.22827975545326	1.17218592449734	0.539397750509195	1.39826445093384	0.118367676336964	-0.413787967238935	-0.339145129299908	0.470556353329873	0.792730208169313	-0.0381888328896958
ENSG00000170558	CDH2	Defintive_endoderm	-1.47223746424545	-1.43985461530607	-1.27689587946777	1.03452932174805	0.335878804835463	0.959783837474778	0.598726097830323	-0.445911718916656	0.450384742677158	0.17874349733047	0.460980431001595	0.61587294503811
ENSG00000149557	FEZ1	Defintive_endoderm	-0.0743640228431257	0.244640294673604	0.114978843341726	1.13013345810854	1.44874149129832	1.08227907458507	-0.82926509417652	-1.02842923785679	-1.69498115884888	-0.0787660665485816	-0.135618647348294	-0.179348934385069
ENSG00000149256	TENM4	Defintive_endoderm	-0.387098367425507	-1.06580085587536	-0.348008997283292	1.35959455364275	0.984605338802984	1.27651393307571	-1.50300606800092	-0.041182127444281	-0.0417204125350858	-0.711012722943729	0.763277241203153	-0.286161515216429
ENSG00000109472	CPE	Defintive_endoderm	-0.790220638494247	-1.02621044411364	-1.35059979540821	0.888176735428416	0.460727747577721	0.734137681397919	0.202137907595048	-0.10470884462907	0.286581819937966	-1.35059979540821	1.30894318854999	0.741634437566311
ENSG00000169071	ROR2	Defintive_endoderm	-0.657373781761756	-1.01292225308214	-0.915079047892551	1.5551085613007	0.85255349519126	1.71692300779629	-0.789483853086559	-0.252158065431826	-0.201641976163829	-0.162979826685127	-0.247033811382822	0.114087551198367
ENSG00000196782	MAML3	Defintive_endoderm	-1.01311411373252	-1.01727033141551	-1.32613774237822	1.27515988746726	0.546666963488064	1.52076489421952	-0.413614720304555	0.0431462403276255	-0.164910535214844	0.0293630590475997	0.897033532401305	-0.377087133905735
ENSG00000139112	GABARAPL1	Defintive_endoderm	-1.1505371844429	-1.82345765156869	-0.832993850476135	0.90582065840841	0.651144740809634	1.04026996376809	0.557176888568327	-0.210375246503824	-0.070703156979036	-0.00829197289118877	-0.0196962420684219	0.961643053375736
ENSG00000056291	NPFFR2	Defintive_endoderm	0.569703168854729	-0.229716698924538	0.0107043098793955	1.36564545371851	0.680349820659745	1.59531330819932	-0.0664414770024537	-0.616975377230002	-1.04234060988874	-1.04234060988874	-1.04234060988874	-0.181560678488497
ENSG00000173598	NUDT4	Defintive_endoderm	-1.3144252206044	-0.944485715427643	-1.7542495514252	0.871106517388836	0.768664590338414	1.08825421947462	0.563570220830053	0.203316417580089	-0.239047948852041	0.239459718373985	0.0624180967762307	0.455418655547044
ENSG00000280623	PCAT14	Defintive_endoderm	-0.361927598726895	-1.11309302651285	-0.746635215980562	0.306442846656083	0.285208052741068	0.873561109299808	-1.43748237780741	-0.838765930277396	0.473243993087592	1.17077510589316	1.22206060615078	0.166612435476626
ENSG00000215866	LINC01356	Defintive_endoderm	-0.337073750135848	-1.0444886613635	-0.658101963062949	1.30926980022181	0.256491952070599	0.616038109949826	0.919207356028174	0.396230857277114	1.19860013739643	-0.567196515654654	-1.0444886613635	-1.0444886613635
ENSG00000117069	ST6GALNAC5	Defintive_endoderm	-0.036806994636192	-0.404172571909039	-0.0607479552318884	1.60479507733226	1.46972129894227	0.927931558451876	-0.647856409120592	-0.988493449748236	-0.99974947938589	-0.73950433716439	-0.0614963076108181	-0.0636204299193626
ENSG00000215009	ACSM4	Defintive_endoderm	-0.491167125225827	-0.491167125225827	-0.491167125225827	1.48586194992184	1.40366557277585	1.53097660433476	-0.491167125225827	-0.491167125225827	-0.491167125225827	-0.491167125225827	-0.491167125225827	-0.491167125225827
CTD-2034I4.1	NA	Defintive_endoderm	-0.393254561567222	-0.280773164156958	-0.218775817150972	1.80282354815573	1.36860526172396	1.13530282221727	-0.605162515451525	-0.605162515451525	-0.388115511964177	-0.605162515451525	-0.605162515451525	-0.605162515451525
ENSG00000115353	TACR1	Defintive_endoderm	-0.353195712622381	-0.381413290194446	-0.251919334089228	1.31664746213936	1.05828046819988	1.40124646627118	-1.19403720115865	-0.173455141731289	0.284091639441543	-0.716745055449797	0.204536900352468	-1.19403720115865
ENSG00000185666	SYN3	Defintive_endoderm	-0.380350389903489	0.347905913503618	-0.0250078893218149	0.990437175883316	1.07174242815286	1.15485642614351	-0.773045900905803	-0.995490368546937	-0.767741293371278	-1.27165288808324	1.00111062646475	-0.352763840015492
ENSG00000041982	TNC	Defintive_endoderm	-1.32384167070155	-0.9575084599081	-0.944493207818484	1.31725153318787	0.533879699029181	1.42108872541551	-0.514007188879408	0.0187230152627569	-0.0437189641558344	-0.381881382919606	0.705006557115255	0.169501344372412
ENSG00000255319	ENPP7P8	Defintive_endoderm	-0.787026526446321	-0.462637175151754	-0.787026526446321	1.51038616559531	1.02430101653961	1.16968406365768	-0.787026526446321	-0.0335718612011706	-0.569979522958973	-0.309734380737473	0.819657800042062	-0.787026526446321
ENSG00000152936	LMNTD1	Defintive_endoderm	-0.470684932528305	-0.682592886412608	-0.296206188112055	1.55618364442401	1.29117489076288	1.40214459039352	-0.682592886412608	-0.454289853287606	-0.110133976320834	-0.682592886412608	-0.187816629681181	-0.682592886412608
ENSG00000183960	KCNH8	Defintive_endoderm	-0.171654547635192	0.450229844144824	-0.0571234433143837	1.47468900272246	1.3084888995241	1.00909870578639	-0.879069458862845	-0.453704226204109	-0.879069458862845	-0.0437463995727203	-0.879069458862845	-0.879069458862845
RP11-431J24.2	NA	Defintive_endoderm	-0.527414412416303	-0.203025061121736	-0.321324141203275	1.65024144320074	0.891099727992574	1.67490891804582	-0.527414412416303	-0.527414412416303	-0.527414412416303	-0.527414412416303	-0.527414412416303	-0.527414412416303
ENSG00000115825	PRKD3	Defintive_endoderm	0.349753077172277	0.0368296226684919	-0.279616176563636	0.877437693786747	1.41306007005424	1.16277560501905	-1.58773786225463	-0.261591629849276	-0.452150895948018	0.0578117579217645	-1.09217202488672	-0.224399237120298
ENSG00000099284	H2AFY2	Defintive_endoderm	-0.181649092122756	-0.787547584988016	-0.366550362668961	1.17947190466238	1.02699459107873	1.07496387964333	-1.79369287086622	0.110617592813363	0.449395927893712	-0.227783138701981	0.156295971168777	-0.640516817912347
CTD-2562J17.6	NA	Defintive_endoderm	-0.0649853969343255	-0.816150824720278	-1.14054017601485	1.26744588759241	0.908066977961656	1.00418786531027	-1.14054017601485	-0.387085510769695	-0.418591947375337	-0.0186065132411648	1.08656005882076	-0.279760244614604
RP13-188A5.1	NA	Defintive_endoderm	-0.289476457766904	-0.463320660125742	-0.416421026235816	1.46727216751263	0.579141207972552	1.20934927931555	-1.46946594600395	0.296233012189319	0.377581526185582	-0.634142886713825	0.31905825240951	-0.975808468738903
ENSG00000158813	EDA	Defintive_endoderm	-0.630960923394442	-0.835577475791104	-0.616617469764991	1.32782426382129	0.725088699717073	1.33396444988199	0.0200706914473541	0.414156977398091	0.291552605421461	-1.27887588409417	0.147028703772616	-0.897654638415176
ENSG00000185046	ANKS1B	Defintive_endoderm	-0.574282525590259	-0.233935546545757	-0.69069161815599	1.40790599601958	0.91989700416289	1.15551167257899	0.716537437490307	-0.502157650838242	-0.0321507985838512	-1.46558502377001	-0.154352971065398	-0.546695975702263
ENSG00000064763	FAR2	Defintive_endoderm	0.0874088298848226	0.449144045704559	-0.114796312750982	1.0410041995334	0.947312668247446	1.09317055554155	-1.36698186407385	-1.13867883094885	-0.961311883742962	0.681612214089899	-0.211681688811429	-0.506201932673608
ENSG00000068400	GRIPAP1	Defintive_endoderm	0.0743880325681232	-2.08937344272295	0.0907199801181351	0.691698931782653	1.03794457800746	0.91499991172982	-0.796415081677401	0.358962370933845	-0.0591477135044673	-0.728440023913111	0.137726792112658	0.366935664565235
ENSG00000157404	KIT	Defintive_endoderm	-0.458201186658042	-0.292897389316098	-0.142994147552956	1.48202969931129	0.888515683192642	1.1130989532975	-1.29904267519431	0.0475488883263004	0.0924609849601286	-1.29904267519431	-0.436528273261892	0.305052138089735
AP000662.4	NA	Defintive_endoderm	0.370162674399181	-0.336597740770062	-0.261163673283439	1.34765452914031	0.381483473395373	1.2823404662714	-1.51334922460631	-0.914632777076288	-0.532145484185497	-0.678026165316182	0.581838520100685	0.27243540193083
ENSG00000249188	ENPP7P1	Defintive_endoderm	-0.367483262592333	-0.603473068211726	-0.23701525767944	1.58282224379171	0.79482801104219	1.66742124792353	-0.358922345753646	-0.502497186847557	-0.522192439175406	-0.0925393602161684	-0.433086162774866	-0.927862419506293
ENSG00000109576	AADAT	Defintive_endoderm	-0.270494473413065	-0.0806180593737085	0.176070726584311	0.690910112950661	0.766428114435334	1.20990747749563	-0.571967284999677	1.0304033709478	0.362859953009045	-0.712543358595837	-1.05309016115453	-1.54786641788596
ENSG00000261366	MANEA-AS1	Defintive_endoderm	-0.290201070824054	-0.362451093967349	-0.480750174048888	1.49081541035513	1.28692733191357	1.33530328429867	-0.117900371509269	-0.686840445261916	-0.114381535170142	-0.686840445261916	-0.686840445261916	-0.686840445261916
ENSG00000101004	NINL	Defintive_endoderm	-0.208818674237638	-0.853468675124149	-0.59677988916613	1.08440360180772	0.771651575262935	1.05303098594445	-1.34481790075012	0.802871316678129	0.272137332190312	-0.959783614826566	0.514506349320316	-0.534932407099266
ENSG00000221818	EBF2	Defintive_endoderm	-0.552517968789696	-0.764425922673998	-0.764425922673998	1.06145738844594	1.13040677532768	0.811471783934643	-0.764425922673998	1.20449634433099	0.436464956063008	-0.764425922673998	-0.269649665942572	-0.764425922673998
ENSG00000116106	EPHA4	Defintive_endoderm	-1.0203111206968	-1.09256114384009	-0.474832628065245	-0.0572597863649111	0.631656658841839	1.08966631035986	0.546745522257014	0.487359968544924	1.17590387069205	0.14895923702958	-0.0183763936235488	-1.41695049513466
ENSG00000155849	ELMO1	Defintive_endoderm	-0.511973794309744	-0.603671156653124	-0.944636017314934	1.40723772746584	1.12408412947225	0.961004339376482	-0.903863207592257	-0.505765044140206	-0.286095197742795	-0.630911836473559	0.867343840560707	0.0272462173513377
ENSG00000183378	OVCH2	Defintive_endoderm	-0.447619804313566	-0.335138406903301	-0.273141059897316	1.57924877263875	0.513488004390177	1.80062466141753	-0.659527758197869	-0.234162525539133	-0.442480754710521	-0.182235612489021	-0.659527758197869	-0.659527758197869
ENSG00000118640	VAMP8	Defintive_endoderm	-0.722422048165	-0.38651205286502	-0.872416374874412	1.48010629401936	1.16937786475737	1.19451035868033	0.209537037335096	-0.0341830523695164	-0.362372657964258	-0.441329873927584	-0.164689435190151	-1.06960605943622
ENSG00000211456	SACM1L	Defintive_endoderm	-0.673726253494555	-1.06396314234017	0.987281001516347	-0.296671664835198	1.55549893625755	-0.245941332520135	-0.784648399423818	1.22527323935564	0.370105449880102	-0.200330592876396	-0.630489392491207	-0.242387849028162
RP11-379B18.5	NA	Defintive_endoderm	-0.828035611577696	-0.799352503409331	-1.18232449727863	0.850361762344967	0.731340203464442	1.02372686000015	-0.412515635605371	1.23068982495925	0.522311602403351	-0.911122622782808	0.0101593330194576	-0.23523871553778
ENSG00000173218	VANGL1	Defintive_endoderm	-0.725003233897684	-0.916846393950038	-1.15148001071687	1.31152275765784	1.13375861283376	1.3294338994071	0.0386608456528768	-0.564517393454535	-0.121884905179294	-0.188671497790119	-0.143609035751282	-0.00136364481176532
RP11-179A16.1	NA	Defintive_endoderm	-0.0180036532344916	0.131306161536132	-0.651359559722305	1.20999292213571	0.61333440151439	1.80638021298123	0.0949652195740072	-0.444538476226388	-0.98094613798419	-0.72070099576269	-0.703216884740111	-0.337213210071297
ENSG00000003402	CFLAR	Defintive_endoderm	-1.50718229456193	-1.25493754051169	-0.815375900153023	0.62888991381682	0.914572414019822	0.439055354018627	-0.774603090430346	0.380774362180901	0.600924254503181	0.23147293982452	0.767661931480827	0.38874765581229
ENSG00000152969	JAKMIP1	Defintive_endoderm	-0.282730273984384	-0.679369648422246	-0.132736066673013	1.61804304361938	1.21546304957943	1.20879851622699	-0.679369648422246	-0.451066615297244	-0.273699668091359	-0.679369648422246	-0.184593391690819	-0.679369648422246
ENSG00000140455	USP3	Defintive_endoderm	-0.784701597385809	-0.756018489217444	-0.958694055999216	1.3071229720515	0.377609676248714	0.965962732807454	-0.369181621413485	0.623841512705218	0.62663221830722	-1.34508075429977	0.0534933472113441	0.259014058984271
RP13-726E6.2	NA	Defintive_endoderm	0.23048965147072	-1.13810499241788	-0.447257830591026	1.37257967088013	0.584585438130604	1.58072967632792	-0.162205859531594	0.208486571102728	-0.280713227823282	-0.660812846709031	-0.643328735686452	-0.644447515152832
ENSG00000159167	STC1	Defintive_endoderm	-0.312015025330222	-0.695040585263308	-0.197483921009414	1.44081906213528	1.16812842182907	1.06530754024825	-1.01942993655788	-0.791126903432873	-0.613759956226988	0.102503726215805	-0.524653679826449	0.37675125721872
RP11-363G15.2	NA	Defintive_endoderm	-0.514895703603091	-0.190506352308524	-0.308805432390063	1.38853895701734	1.20779472694539	1.50724802595749	-0.514895703603091	-0.514895703603091	-0.514895703603091	-0.514895703603091	-0.514895703603091	-0.514895703603091
ENSG00000175497	DPP10	Defintive_endoderm	-0.179981602019446	0.00894441098646226	0.13009759536874	1.26497189941977	0.820423732464108	1.37348429010001	-1.02436459659456	-0.862633313129909	-0.15321625729131	-0.878330066707162	0.347691583930267	-0.847087676526967
ENSG00000164975	SNAPC3	Defintive_endoderm	-0.663463899694911	-0.572799392103456	-1.42972807420552	0.315359741793247	0.660568599931408	0.929023818632778	-1.37341486597857	0.467910047130986	-0.109309722628328	0.300808143805954	0.904757229644029	0.570288373672387
ENSG00000171444	MCC	Defintive_endoderm	-1.17599901720828	-1.01554774134958	-1.25685355064505	1.02165857228371	0.854162521293315	1.27604768231837	-0.0697137698068984	-0.0556729680807164	0.143126443453895	-0.104974080159272	0.331708097114065	0.0520578107864393
ENSG00000115457	IGFBP2	Defintive_endoderm	-0.247628260331734	-1.13689979568209	-0.324161860391226	1.02808370942016	1.15777527412871	1.12875098100739	-1.43709184662122	-0.237090104336923	-0.217012472529351	0.0527617602611743	-0.167080919882163	0.399593534957281
ENSG00000166250	CLMP	Defintive_endoderm	-0.215590089176276	-0.771560822100675	-0.241870177967589	0.975231793470644	0.95439421852848	1.3539256157606	-0.60828560017859	-1.15881950040614	-0.488959835698492	0.161168619086436	0.763770580346235	-0.723404801664634
ENSG00000182841	RRP7BP	Defintive_endoderm	-0.251450053801191	0.295850050255071	-0.192902189492527	0.283389962930642	0.353723079485697	0.886572107804728	-1.62004469768979	1.50354365262474	-0.0601986928051033	-1.14275255198094	-0.221470596178676	0.165739928847347
ENSG00000164488	DACT2	Defintive_endoderm	-0.614686895934854	-0.733039542080182	-1.32210180716251	0.334927448337124	0.79765316479359	0.935605490616811	0.230635895840748	-0.723385359632488	1.19093592797491	-0.844809661453659	0.284582519325876	0.463682819374629
ENSG00000249101		Defintive_endoderm	-0.350380489542117	-0.56228844342642	-0.015654861677187	1.09474081207321	0.964901122185185	1.7487550436808	-0.56228844342642	-0.56228844342642	-0.56228844342642	-0.56228844342642	-0.56228844342642	-0.0686309661613738
ENSG00000196177	ACADSB	Defintive_endoderm	-0.630459693767412	-1.19083885068137	-0.804452152380819	0.922991917730146	0.85776830329513	0.549626486987421	-1.19083885068137	0.0550521000977655	0.839386878537108	0.714087529314792	0.207735250829742	-0.330058919281131
ENSG00000164619	BMPER	Defintive_endoderm	-1.14366040203445	-1.14366040203445	-1.14366040203445	0.60026482242905	0.484588626975434	0.672545747375973	0.988598321404711	-0.390205736789298	0.33446843856574	0.217273016775388	0.806328440000552	-0.282880470634207
ENSG00000214941	ZSWIM7	Defintive_endoderm	-0.265663905329948	-0.164467200574223	0.166039814405231	0.402706540053031	1.56244915696851	0.546949480238769	-1.34121868441047	-0.320636624983111	0.295962930935705	0.404134667740843	-1.34121868441047	0.0549625093661277
ENSG00000100473	COCH	Defintive_endoderm	0.15704864136113	0.222170351007409	0.125244201503222	0.994034585045704	1.11663005191908	1.1167636704757	-0.811138656573611	-0.893845621987591	-0.308908948859707	-0.42610437065006	0.00148640895356467	-1.29338031219485
ENSG00000138180	CEP55	Defintive_endoderm	-0.1753870984821	-0.0100833011401562	-0.0741107199489468	1.49445607627964	0.957539190157123	1.00591514254222	-1.01622858701836	-1.01622858701836	-0.610558606687476	-0.538936441309516	0.139071588244057	-0.155448655618123
ENSG00000114933	INO80D	Defintive_endoderm	0.0751335617705267	0.227898078245207	0.101016445668142	1.20827857734096	0.863688532408139	1.13542048540227	-1.30001279529785	-0.623061918271362	-1.0115611044559	-0.123599516899188	-0.0804286706370387	-0.472771675273904
C17ORF51;RP11-822E23.8	NA	Defintive_endoderm	-0.336396561864788	-0.136878974534502	-0.739233316591553	1.32126804206163	1.38763747319896	1.07618977889854	-0.621697069172949	-0.192681722223562	-0.308040104867561	-0.215255913804624	-0.44450880117431	-0.79040282992527
ENSG00000103021	CCDC113	Defintive_endoderm	-0.167282709051355	0.148495758460427	0.138503913901558	1.01559434516891	1.14494150939438	0.443513511124985	-0.151696292478706	0.246401870973344	0.527058319082737	-1.44465465352425	-0.949878396792825	-0.950997176259205
ENSG00000112130	RNF8	Defintive_endoderm	-0.24655906799463	-0.202601615617105	-0.00278330956861073	0.483931834517864	1.219056756846	0.875277943145266	-0.16257192926493	0.707907809922228	0.488952130232509	-1.21520108158961	-1.17013861955077	-0.77527085107821
ENSG00000265126		Defintive_endoderm	-0.0570278906101982	-0.695604631529849	-0.0778761157549992	1.0938367855871	1.4656973192642	0.796212166586005	-0.0440948499381317	-0.126801815352112	-0.447535072732642	-1.01999398282442	-1.01999398282442	0.13318207012946
ENSG00000157399	ARSE	Defintive_endoderm	-0.627091190020734	-0.434668299376272	-1.0237305644586	0.633298691041035	0.604518464551286	0.263670541540518	-0.45479049070595	0.81293819913478	1.40481476289356	-1.0237305644586	0.374843537052517	-0.53007308719355
ENSG00000176641	RNF152	Defintive_endoderm	-1.09411313499176	-0.9816317375815	-0.919634390575514	0.807809679535451	0.667746688299419	0.951686208903251	-0.73708101512342	-0.0601301380969299	-0.324817348455257	0.259888643288176	0.789166655830924	0.641109888967165
ENSG00000173334	TRIB1	Defintive_endoderm	-0.114794081400692	-0.753370822320342	-0.135642306545493	0.969290646512592	0.223220439819191	0.878950416489087	1.46680759310039	-0.0571781141875536	-0.860713170127561	0.0441734891587706	-0.582983916883483	-1.07776017361491
ENSG00000107831	FGF8	Defintive_endoderm	0.113621955162608	-0.593792956065045	-0.0471593743158123	1.06323629943459	1.45481419791146	1.14667238160375	-0.593792956065045	-0.168427723406309	-0.593792956065045	-0.593792956065045	-0.593792956065045	-0.593792956065045
ENSG00000117834	SLC5A9	Defintive_endoderm	-0.803173511464395	-0.803173511464395	-0.803173511464395	1.24387730866311	0.615340628944483	1.28156396534173	-0.234233437711748	0.637546007176221	-0.0812252828248861	-0.803173511464395	0.0593408904680195	-0.309516034199348
ENSG00000123094	RASSF8	Defintive_endoderm	-0.681176610144246	-0.142422644838734	-0.905503634849008	1.08482127610348	0.818787441917133	1.10917752472566	-0.185747980580781	-0.820918138266209	-1.10115679002255	0.553814687508023	0.136639190089849	0.133685678357375
ENSG00000101445	PPP1R16B	Defintive_endoderm	0.408933565386877	-0.554032526827341	-0.00739894507810757	0.911727413958452	0.478553518734697	1.85810910166446	-0.554032526827341	-0.325729493702339	-0.554032526827341	-0.554032526827341	-0.554032526827341	-0.554032526827341
ENSG00000121957	GPSM2	Defintive_endoderm	-0.0445663306523651	-0.315792989247054	0.020376279972024	1.41744393455014	1.26765788779337	0.762799201680864	-0.752998201372615	0.118781243515354	-0.340734534704452	-0.844646129416414	-0.827162018393835	-0.461158343725021
ENSG00000182836	PLCXD3	Defintive_endoderm	-0.743252352799842	-0.418863001505275	-0.743252352799842	1.4344035028172	0.557728260634259	1.14491581184939	-0.743252352799842	-0.144535905269823	-0.337582372468955	0.617681066009994	0.119262049132572	-0.743252352799842
ENSG00000236384	LINC00479	Defintive_endoderm	-0.97560943677503	-0.97560943677503	-0.97560943677503	0.768315787688468	0.197406325813016	0.981101153328967	0.000289696111254401	0.861059326818347	0.935116934119977	0.14632422599865	-0.480833180043603	-0.481951959509983
ENSG00000102271	KLHL4	Defintive_endoderm	-0.0755486504310294	0.0277787682775692	-0.0636078942760738	1.06164216283329	1.31593522094462	1.13568349823573	-0.186470796360292	-0.976521997533085	-0.718089414589298	-0.368367849485201	-0.481071489469881	-0.671361558146334
ENSG00000133606	MKRN1	Defintive_endoderm	-0.0253945654020957	-0.217237725454449	-0.237940681649344	1.06625978940247	0.979729021662082	1.24366470879737	-0.825049135538047	-1.16568617616569	-0.412785468869884	-0.558666150000569	-0.238689034028274	0.391795417246442
ENSG00000124126	PREX1	Defintive_endoderm	-0.205720352885983	-0.324072999031312	-0.913135264113636	0.743893991385995	0.898192278872291	1.34457203366568	-0.913135264113636	-0.0199430966413323	0.0680684763071735	0.652774468050606	-0.41835900738221	-0.913135264113636
ENSG00000100033	PRODH	Defintive_endoderm	0.168775493086422	-0.703448370277437	0.562781202541528	0.994612382056371	0.45769549593385	0.506071448318948	-1.51607228124164	0.38823818243795	0.676672177587212	-0.394138618467956	-1.02129602451021	-0.119891087465041
ENSG00000114107	CEP70	Defintive_endoderm	-0.439460407466339	-0.340806692842685	0.217383327712375	0.599931012252314	0.9245863501037	1.13005529747054	-0.0352544773185768	0.811049542095964	-0.170873436008765	-0.972731992064813	-0.409480949843824	-1.31439757408989
ENSG00000176597	B3GNT5	Defintive_endoderm	-0.883252427931874	-0.883252427931874	-0.336618846182641	0.476438280837877	1.4904658030209	0.777274343381453	-0.883252427931874	-0.457887195273138	0.0979513124889357	0.477680990877962	-0.388476171200447	0.512928765844721
ENSG00000198838	RYR3	Defintive_endoderm	-0.042475629115581	-0.425501189048667	0.502295010979633	1.29716027978427	0.972799890205249	1.06631560906719	-0.749890540343234	-0.521587507218232	-0.344220560012347	-0.749890540343234	-0.255114283611808	-0.749890540343234
ENSG00000096433	ITPR3	Defintive_endoderm	0.0266428680915309	-1.25072907638137	-0.0946805487400155	0.796321743746136	-0.0777133137933195	0.893998964943749	-1.25072907638137	-0.652012628851347	0.0486139407043074	0.11020434242847	0.355955250107018	1.0941275341262
ENSG00000137936	BCAR3	Defintive_endoderm	-0.431051997099582	-1.14409257338965	-1.21550514161804	0.883894628806547	0.42714204353318	0.99408533768936	-0.114146879145435	-0.36440103916381	0.070757024650284	-0.458131552757408	0.910687251231082	0.440762897263469
ENSG00000175893	ZDHHC21	Defintive_endoderm	-0.522675862777822	-0.0769097338135745	0.169130531631086	1.15572151114484	0.811777678309898	1.22798846741544	-1.08305501969178	-0.189862852219478	-0.225663255097185	0.0388786430818984	-1.08305501969178	-0.222275088291541
RP11-348F1.2	NA	Defintive_endoderm	-0.248910889348087	-0.46081884323239	-0.074432144931837	1.36506446788755	1.58778831074411	0.596222158274994	-0.46081884323239	-0.46081884323239	-0.46081884323239	-0.46081884323239	-0.46081884323239	-0.46081884323239
ENSG00000114450	GNB4	Defintive_endoderm	-0.822084650611241	-1.16098346089579	0.132931614503368	0.775988879074002	0.991110640285779	1.2552362003171	0.0464227705574061	0.11377723020015	-0.00901472299282791	-0.0139660710635203	-0.326176929398073	-0.983241499976359
ENSG00000135074	ADAM19	Defintive_endoderm	-0.654050537864205	-0.629956689259163	-1.0867127608694	1.14407386547791	0.604535931709438	1.24446510807784	-0.566097738155903	-0.647841787694668	0.25395605363445	0.173464929932901	-0.243710567485272	0.407874192496065
ENSG00000126010	GRPR	Defintive_endoderm	-0.229211551121001	0.216554577843247	-0.583500436821932	1.11384395258547	1.10524198996672	1.29514676877117	-0.78959070803496	-0.364225475376224	-0.383920727704073	-0.78959070803496	-0.294814451303534	-0.295933230769914
ELAVL1;FBN3	NA	Defintive_endoderm	-0.226510396823668	-0.933925308051322	0.00819255901809512	1.24373054756572	0.593264257560284	0.806540029617471	-0.933925308051322	-0.335208860521303	-0.361466397959548	-0.933925308051322	0.221374867211098	0.851859318485815
ENSG00000106263	EIF3B	Defintive_endoderm	0.0558483479915832	0.0785736948100872	0.193922304333066	0.889485438781914	0.6902599119631	1.19388203116372	0.0299967216801624	-1.23259227251125	-1.0522834532016	-0.892240913128766	-0.15798658723161	0.20313477534958
ENSG00000261645	DISC1FP1	Defintive_endoderm	-0.58554225007583	-0.556859141907465	-0.203803539920373	1.36476325630822	0.576769023558694	1.40570989643089	0.147036954055756	-0.125339347562433	-0.0506965096234064	-0.668629261280941	-0.651145150258363	-0.652263929724743
ENSG00000015133	CCDC88C	Defintive_endoderm	0.496730009729576	-0.572296567880517	0.0106861200749311	0.794855494404525	0.961178302753562	1.03651447793729	-1.33265579713554	-0.210539346390591	-0.341749866003501	-0.540662452078351	0.446359442522923	-0.748419817934311
ENSG00000106025	TSPAN12	Defintive_endoderm	-0.357594406953202	0.171357727742852	0.487854483877065	1.15886747010246	1.23975210134403	0.720123402589069	-0.968643821437602	-0.399953478839315	-0.81563566655074	-0.176650476380412	-0.675069493257834	-0.384407842236373
ENSG00000129682	FGF13	Defintive_endoderm	-0.358563933767129	-0.498293387589804	-0.430914321321088	1.21687954312804	0.750140748350637	1.2303714609354	-0.89973564461847	-0.830178447071882	-0.327129659490122	0.452831425680261	0.166820992241405	-0.472228776477247
ENSG00000137486	ARRB1	Defintive_endoderm	-0.705098182402151	-0.291937258654519	-0.161150526168925	1.01428016589146	0.847553730819441	1.11928568381357	-0.332349967635942	-0.444368151998582	-1.31262876054742	0.413946720661214	-0.486513569128084	0.338980115349942
ENSG00000186153	WWOX	Defintive_endoderm	-0.590259693130633	-0.692949912062093	-0.571796727679815	1.07670234282375	0.354393428027151	1.0831629504147	-1.40919969148385	0.0329427613774049	0.407293262699993	-0.00398497451932478	0.559545198773938	-0.245848945241216
ENSG00000169570	DTWD2	Defintive_endoderm	-0.153152396780811	0.134106473494396	-0.511195869469396	1.02061657656745	0.981152647303438	0.623568705086139	-1.33314188501786	-0.734425437487838	-0.237916987651474	-0.211208222244177	0.893958349817747	-0.472361953617616
ENSG00000137834	SMAD6	Defintive_endoderm	-0.990501065404761	-0.613346754206739	-0.996318748076036	1.40414693187457	0.520281411259419	0.754301570814933	0.0905493417564811	-0.30921685181676	-0.480460790649555	-0.367085959998939	0.404275307199319	0.583375607248072
ENSG00000180875	GREM2	Defintive_endoderm	-0.736190619713269	-0.948098573597572	-0.948098573597572	0.616463463617249	0.470415566811305	0.62779913301107	0.604639129405683	-0.194643908352422	0.0331051668232378	-0.470806427888724	1.39985673981354	-0.454441096332526
ENSG00000176148	TCP11L1	Defintive_endoderm	-0.26059443652768	-0.111284621757057	-1.05419722646417	0.673246843646791	-0.0220697843558488	1.1546997426651	-1.44058392476473	0.250472599732869	0.269997796944087	-0.0796505059548904	0.907371388646383	-0.287407871810851
ENSG00000196208	GREB1	Defintive_endoderm	0.171779670469684	-0.0200634895826695	-0.143770053650781	0.980840882198128	1.11747955890238	1.3098018320756	-0.627874899666268	-0.598098525888895	-0.791144993088027	-0.36149191412879	-0.3343005714865	-0.703157496153868
ENSG00000074590	NUAK1	Defintive_endoderm	-0.466045313175821	0.265790882818588	-0.0881529310309594	1.22974751787988	0.742274044439897	1.08921721995141	-1.17447718389607	-0.396825694128111	-0.88602549305412	-0.382483838838881	-0.136732931160334	0.203713720194515
ENSG00000136160	EDNRB	Defintive_endoderm	-0.464551854918259	-0.614894036168277	-1.42751794713248	0.398365363987458	0.824799722226046	0.148379759476165	1.11704981958283	0.263538577365119	-0.57012618253788	0.871516444167934	-0.272217771870057	-0.274341894178601
ENSG00000073849	ST6GAL1	Defintive_endoderm	0.465456749215409	-0.241117746361142	-0.267754553703814	0.879494457377032	-0.00863650216304901	0.580410261948511	-2.05724365613955	0.297476249135733	0.327124336133469	-0.31189030398824	0.169856578696054	0.166824129849589
ENSG00000132872	SYT4	Defintive_endoderm	-0.0482264910230348	-0.166579137168363	-0.0647942404238355	1.35818936616083	1.43191695613626	0.531759703748426	-0.186701328498041	-0.527338369125686	-0.53859439876334	-0.27834925654184	-0.755641402250688	-0.755641402250688
CTD-2034I4.1;CTD-2034I4.2	NA	Defintive_endoderm	-0.29193758204505	-0.503845535929353	-0.503845535929353	1.47318353921831	0.797135077504748	1.23661980173944	-0.503845535929353	0.0948709116006663	-0.286798532442004	-0.503845535929353	-0.503845535929353	-0.503845535929353
ENSG00000120833	SOCS2	Defintive_endoderm	-0.884703683314776	-0.952824968427415	-0.567881757139972	0.47929450959099	0.44270084670208	0.849749391807726	-0.867335623936413	0.277388906022791	-0.573025854750136	0.590403772941021	0.0393908836816905	1.16684357682241
ENSG00000125257	ABCC4	Defintive_endoderm	-0.597315048698245	-1.45291518564072	-1.08645737510844	0.40035131868175	0.596413694017485	0.634837091556513	0.505866516683473	-0.0116055787420226	-0.477961519849619	0.127621843060872	0.682159673686067	0.67900457035289
ENSG00000139437	TCHP	Defintive_endoderm	-0.733066189186617	-0.761283766758681	-0.883060515896028	0.723505014318746	1.20342831881139	1.10490754759662	-0.280949316677336	0.395014589282107	-0.274564660637208	-0.738584618432756	0.0327766487655023	0.211876948814256
ENSG00000162688	AGL	Defintive_endoderm	-0.713388429813715	-0.239549932971302	-0.741499574622908	0.572833486766894	0.614016100203141	1.04775619802822	-1.27285894055232	-0.808038554797991	0.344096292388107	0.689749907783336	0.410784910519587	0.0960985370689578
ENSG00000113269	RNF130	Defintive_endoderm	-0.224582156902497	-0.212537587058513	-0.138950443154517	0.852957772921491	1.49097908933136	1.09638627362362	-0.136712504038231	-0.436692991214515	-0.401838791170908	-0.536929980150372	-0.482895237183652	-0.869183445003259
ENSG00000153363	LINC00467	Defintive_endoderm	-1.00273409268016	0.00341119319805028	-0.311886930853305	1.29467859936147	0.892098605321523	0.885434071969079	-1.00273409268016	-0.404017645150138	-0.430275182588383	0.358199326129679	-0.140219690747743	-0.141954161279916
ENSG00000050327	ARHGEF5	Defintive_endoderm	0.203208540425827	-0.152339930894561	-0.229453682579363	0.92634682970502	0.492128543273255	0.720684096559895	-0.505740101015947	-0.344008817551297	-0.624247469307634	-1.48163923390223	-0.0830651323911176	1.07812635767815
FAM189A1;NDNL2	NA	Defintive_endoderm	-0.378619502278987	-0.761645062212073	-0.879944142293612	0.478527623708181	0.542214615503242	0.998703063299486	-0.110135280620356	-0.660669180847904	-1.08603441350664	0.818891966489523	0.520649912981743	0.5180603997774
ENSG00000196116	TDRD7	Defintive_endoderm	-0.977523095574861	-0.977523095574861	-0.977523095574861	0.67950615992477	0.996244681600625	0.598374611033781	0.315435265470684	-0.552157862916125	0.733058626133952	-0.142200036284736	0.421051005936252	-0.11674316417462
ENSG00000210194	MT-TE	Defintive_endoderm	-0.208858626264885	-0.644150921172107	-0.664853877367002	1.04010134873826	-0.0982119744598688	1.11720794381712	0.462268648610412	0.269161085649636	-1.09895417636884	-0.698968742234672	0.742066882776255	-0.216807591724312
ENSG00000204977	TRIM13	Defintive_endoderm	-0.673720476585907	-0.909710282205299	0.108214921597419	0.231660307285927	1.13961859745291	0.506365704168926	0.0588587275456787	0.294980850831882	0.546327913680473	0.670826746496297	-0.73932337676844	-1.23409963349987
ENSG00000226091	LINC00937	Defintive_endoderm	0.718845263661903	-0.411156079002201	-0.349158731996216	0.624145278472982	0.987145000251715	1.28659829926382	-0.735545430296769	-0.735545430296769	-0.51849842680942	-0.258253284587921	0.126968971635645	-0.735545430296769
ENSG00000255549	ENPP7P6	Defintive_endoderm	-0.454760492597689	-0.262337601953226	-0.465013168734998	1.32625598858149	0.959927675950377	1.10531072306845	-0.282459793282904	-0.623096833910548	-0.445729886704664	-0.0160768077454261	-0.851399867035551	0.00938006436469019
ENSG00000184261	KCNK12	Defintive_endoderm	0.00352960944333303	-0.114823036701996	-0.0130381399574677	1.4099454666272	0.328700743777718	1.25282528831968	-0.70388530178432	-0.70388530178432	-0.70388530178432	-0.70388530178432	0.158629100148094	-0.210227824519274
ENSG00000141404	GNAL	Defintive_endoderm	-0.0125183309069041	-0.051813671787833	0.274151351822255	0.796542880821539	0.738641997160595	1.25654094329256	-1.3811129747955	-0.782396527265484	-0.0817699577098296	-0.545789915505378	0.0174611267156108	-0.227936921841627
ENSG00000163872	YEATS2	Defintive_endoderm	0.508971831950404	-0.478038159504421	0.134699459095071	0.248645017279765	0.156537899645262	0.89684166008001	-1.65478964334067	0.03626688115693	-0.797397878746069	-0.29385622453083	0.804674567280693	0.437444589633852
ENSG00000112902	SEMA5A	Defintive_endoderm	-0.806645588924557	-0.680949347462739	-1.34784293283276	0.792814689740127	-0.20446618584143	1.03748814245306	0.51435361397474	0.00730474503241485	-0.136659529210378	0.00801559008002872	0.850447304741655	-0.0338605017501639
NBEAL1;AC011737.2	NA	Defintive_endoderm	0.792477759810809	-0.215180456686388	-0.821714096437559	0.875630292969843	-0.753825962714627	0.788401781759834	-0.0519052347643032	-0.799501334525585	-1.02780436765059	0.717548984500723	0.127495807611833	0.368376826126008
ENSG00000162989	KCNJ3	Defintive_endoderm	0.669950552193929	0.205202518685232	-0.607421392278967	0.957140644935854	0.693559221155134	1.28074677237027	-0.607421392278967	-0.379118359153965	-0.390374388791619	-0.607421392278967	-0.607421392278967	-0.607421392278967
ENSG00000154358	OBSCN	Defintive_endoderm	-0.523761020689625	-1.32318088846889	-0.883619248110225	0.907565031287531	0.550712982382414	0.659884891444616	-0.363004225396732	0.740737682088449	0.0569396593957556	-0.56989506726885	0.323659411188266	0.42396079214729
ENSG00000050767	COL23A1	Defintive_endoderm	0.067617510148497	-0.106226692210342	-0.170254111019132	1.12640455274807	0.306142162320328	1.29976965040326	-0.136472845202265	-0.51365553055853	-1.11237197808855	-0.635079832379701	-0.617595721357123	0.491722835195491
ENSG00000138798	EGF	Defintive_endoderm	-0.581835551519758	-1.14221470843372	-0.93612443722069	-0.0213809519226063	0.384974857177887	1.06010862202841	-0.573274634681071	0.623484249759551	0.0586761703032881	0.762711671562446	0.646309489979742	-0.281434777033477
ENSG00000125733	TRIP10	Defintive_endoderm	0.122816679471717	-1.23220748626698	-1.27463616960007	0.417506779487314	0.664421550739306	0.85754547397019	0.142426266042368	0.581017312323367	0.37147470747954	-0.255360019185066	-0.665969576086888	0.270964481625209
ENSG00000138771	SHROOM3	Defintive_endoderm	0.26668695143656	-0.0809486140761013	-0.241810197236752	0.280581331762532	0.355243145504013	0.515067104637295	-1.89707452385451	-0.206017999356914	-0.337228518969824	-0.151721171703199	0.562389686766849	0.934832805090051
ENSG00000254726	MEX3A	Defintive_endoderm	-0.154069383033792	-0.182286960605857	-0.448277289820823	0.908523789050375	0.633338157439826	1.55672043185062	-0.425970797817409	-0.396194424040037	-0.137519106975459	-0.517618725861208	-0.994910871570056	0.15826518138382
ENSG00000164393	ADGRF2	Defintive_endoderm	-0.867421737398506	-0.867421737398506	-0.867421737398506	0.789607518101125	0.855268693149977	1.02074642725073	-0.298481663645859	0.4791698261221	-0.0100299728039093	-0.390129591689658	-0.372645480667079	0.528759456378089
RP11-9G1.3	NA	Defintive_endoderm	-0.623034361413577	-0.430611470769114	-0.813583464638411	1.21910279498518	0.608575293158443	0.796532413558982	0.273284625194106	0.421045782789176	-0.614003755520552	0.341259682958397	-1.01967373585144	-0.158893804451198
ENSG00000035499	DEPDC1B	iPSC	0.347267780611851	1.56834025298798	1.96705475789804	-0.0207053543234155	1.25519187057964	0.257513150773671	-1.76463057878691	0.0720381848064631	0.146095792108093	-1.28733843307807	-1.26985432205549	-1.27097310152187
ENSG00000121211	MND1	iPSC	1.17607755840619	1.32052085066853	1.93930178268617	-1.49735287588431	1.52246957348224	-0.87411356616095	-0.928412802131666	-0.251461925105176	-0.105849215729878	-0.662029816594188	-1.00257661915289	-0.636572944484072
ENSG00000065328	MCM10	iPSC	1.39713541732932	1.23228707627783	1.94817164516907	-0.168035032628876	0.698193756324666	0.2241135202603	-1.7325970698437	-0.38600550632309	-0.531706191106691	-0.371663651033861	-0.577296894581277	-1.7325970698437
ENSG00000137807	KIF23	iPSC	1.44285687711143	1.22529747331109	1.6703462802481	0.182514835516973	0.625933678202793	0.228882642318331	-0.724996460172932	-0.0231290109825562	0.0140012354877417	-1.44241110388606	-1.41521976124377	-1.78407668591114
LECT1	NA	iPSC	1.59845093077731	1.86591424453294	2.04714435261221	-0.668103817675061	-0.640685437619317	0.031991088746476	-1.14482288824961	-0.916519855124605	-0.572363978157834	-0.66753074254076	-0.282308486317194	-0.651165410984561
ENSG00000100297	MCM5	iPSC	1.51448782199142	1.46625040022615	1.42250728986544	0.314507500891951	0.530827812227618	0.299241004920757	-1.58892715972848	-0.242335596207873	-0.289584142642807	-1.11163501401963	-0.726412757796065	-1.58892715972848
ENSG00000117724	CENPF	iPSC	1.29837124352816	1.38623031408717	1.52085681205138	0.317412370228086	0.793027043960742	0.37785112935502	-1.31280161409643	-0.478551163286883	-0.292108088820479	-1.05955063865716	-1.24078289533731	-1.3099545130123
LINC00371	NA	iPSC	1.31563821706834	1.42473720321168	1.47394331728494	0.510298137279271	0.025377617067718	0.267390247972168	0.570559494050516	-1.39313652334116	-0.987466543010272	-0.915844377632312	-0.898360266609733	-1.39313652334116
ENSG00000183091	NEB	iPSC	0.831579396048604	0.265052196658428	0.479518773563151	0.52681330433061	0.601475118072091	0.606864746492886	2.05909129185825	-1.42253951816143	-0.351499534200759	-1.65084255128643	-0.788328149354018	-1.15718507402139
ENSG00000224411	HSP90AA2P	iPSC	1.0944925519548	0.889655761583002	0.960258469296189	0.43520849927906	-0.436928022829478	0.360463015005791	0.457995732062839	-2.70917923494078	-1.36221581989321	0.409951335361962	-0.224640412124701	0.124938125244524
ENSG00000120694	HSPH1	iPSC	0.450553610804292	0.541218118395746	1.16475745275038	-0.632128056241228	0.00733890544677696	-0.127547572948054	2.38216669660133	-0.648414862059446	-1.11933287148404	-0.269540575149038	-1.81666447443632	0.0675936283195986
ENSG00000176049	JAKMIP2	iPSC	1.65267705889488	1.62846953859561	1.44773410864612	0.37515784925759	0.11157642547687	-0.0125902109611471	-1.18940418795723	-0.590687740427212	-0.332012423362634	-0.712112042248383	-1.18940418795723	-1.18940418795723
AC074363.1	NA	iPSC	1.38230381746139	1.80967686620189	1.20693784838751	0.812521584877803	0.110684996628399	0.193253355134428	-0.456332272324443	-1.25561531008255	-0.913845077961315	-0.887136312554018	-1.14655557339528	-0.855893922373822
ENSG00000160321	ZNF208	iPSC	1.38650432565435	1.00423127512865	1.23158717018137	0.965186502282904	0.220163588702092	0.538019161339352	-1.17339583206787	-0.31933270247829	0.164811394912651	-1.34442053033973	-1.0677800916023	-1.60557426171317
ENSG00000112029	FBXO5	iPSC	1.40886015080949	1.39642955858604	1.70469292019077	0.304638364275032	0.508145742168252	0.0710115033741303	-0.936914730048182	-0.545890842164575	-0.347112788720192	-1.15525739528855	-1.1120865490264	-1.29651593415582
ENSG00000167088	SNRPD1	iPSC	1.54415374821679	1.66781610563081	1.40289663797232	-1.11993217837433	0.962815687429901	-1.11285828479718	-0.231428476168643	-0.753236816474144	-0.51624601602149	-0.400476172756358	-0.814881509617382	-0.628622725040298
ENSG00000185737	NRG3	iPSC	1.29434875112317	1.54062753885531	1.59944997629152	0.10372084104362	-0.467188620831832	0.381939346140706	-1.64020438341988	-1.41190135029488	-0.782812618825281	-0.279270964610042	0.148319814993582	-0.487028330466002
ENSG00000134057	CCNB1	iPSC	1.1593383848818	1.42327907389266	1.46414851116344	0.458760137473122	0.602735710181825	0.500524843675841	-0.815500451094807	-0.409611198913749	-0.413759095442332	-1.22957584588754	-1.42542282782841	-1.31491724210184
ENSG00000168234	TTC39C	iPSC	1.77531504733022	1.69263529631733	1.36732808264393	0.158907469218803	-0.528656153221664	0.170243138612624	-1.40565456799602	-0.806938120465999	-0.683706339356509	-0.283720905222338	-0.910878311264591	-0.544874636595777
ENSG00000138182	KIF20B	iPSC	1.11837744538883	1.33354689109401	1.21210018613762	0.793413892369259	0.397340052627603	0.45160362523895	-1.29183545182256	-0.382977891882362	-0.498336274526361	-0.405552083463424	-2.09001755613668	-0.637662835024878
ENSG00000128944	KNSTRN	iPSC	1.04336915608587	1.10552045946145	1.41187560309681	0.254759719528705	0.83064617988189	0.331866314607568	-1.05350633121465	-0.404428113232161	-0.0133896683911949	-1.24531061540807	-2.11146777748648	-0.149934926929728
ENSG00000120802	TMPO	iPSC	0.596209145390757	1.01812822103848	0.963614486625996	0.667118048644176	0.886100310865981	0.3860005375407	-0.918809759131484	0.249599564686657	0.310239022095975	-0.551705848886008	-1.12630963119549	-2.48018409767573
ENSG00000121904	CSMD2	iPSC	1.56891113730321	1.52690284462386	1.82884212740423	0.0525464517073764	-0.191288890029381	-0.011246303296351	-0.499347231051089	-1.06828730480374	-0.495828394711961	-1.06828730480374	-1.06828730480374	-0.574629827538689
ENSG00000143947	RPS27A	iPSC	1.42311985569224	1.71666297439609	1.41702170216407	0.383018115037361	0.34112139345623	-0.0249061693585775	-0.624384431140625	-1.51444714488715	-0.778624068409581	-0.675107165857676	-0.767983799133136	-0.895491261959234
ENSG00000107105	ELAVL2	iPSC	1.2066320108111	1.43131031134874	1.53474762748427	0.554638586380543	0.198589944315013	0.713815480291334	-0.533450595366441	-1.10239066911909	-0.6967206887882	-1.10239066911909	-1.10239066911909	-1.10239066911909
RP11-485F13.1	NA	iPSC	1.37584078770844	1.61184819671099	0.837276264620405	0.251118518208098	-0.0934715267247279	0.547635091397487	-1.85021379529708	-0.857190661178378	-0.685533348257382	-0.921186548187202	0.662858971339482	-0.878981950340134
ENSG00000105676	ARMC6	iPSC	1.50884209535665	1.07962589981735	1.46918689273753	-0.396845870483628	0.448825067971508	-0.480244323633798	-1.57183102119448	-1.00314067859619	-0.662642254346937	0.467486388753451	-1.27825669301471	0.418994496633257
RP11-531A24.5	NA	iPSC	1.71514047648864	1.65857139559731	1.33082554607913	-0.0611129185182269	-0.133296987936176	0.26958495608442	-0.737372676771575	-0.552858085279071	-0.900642770193334	-0.470989691234097	-0.811536493792795	-1.30631275052422
ENSG00000160818	GPATCH4	iPSC	1.36644011433782	1.17326226304646	1.60147104423879	0.313636230491889	0.268925324365251	0.539508415548991	-0.549049844720449	-1.42501516874078	-0.953149146802987	-0.502642789847129	-1.26433294462884	-0.569053497289008
ENSG00000164048	ZNF589	iPSC	1.32902564402781	1.16417730297631	1.15470685296206	0.102727817475215	1.01998061879973	0.457000454634102	-1.80070684314522	-0.663076426794282	-0.943315078550619	-0.234797110980973	-0.938192441212801	-0.64753079019134
ENSG00000163032	VSNL1	iPSC	1.40817781619899	1.60902342539577	1.52485216918004	0.342211517076716	-0.228697944798736	-0.011602134929559	-0.425814574500498	-0.155822756607645	-0.829254797295008	-0.924421561677934	-0.906937450655355	-1.40171370738678
ENSG00000128951	DUT	iPSC	1.16273523101322	1.52279314515639	1.09166939859388	0.557562799799895	0.700134247038272	0.0210179283200693	-1.44379760601598	-0.971057008868258	-0.397960929829106	0.0460560008664173	-1.33818186555041	-0.95097134052439
ENSG00000182963	GJC1	iPSC	1.39397774359928	1.35815479613016	1.22979657515175	0.536645584841619	0.0167843303257227	0.511738494274701	-0.941465161533236	-0.911688787755864	-1.104735254955	-0.675082175995758	0.0962790912025002	-1.51040523528588
ENSG00000111845	PAK1IP1	iPSC	1.26397632845933	1.42867244956076	1.06184114908167	0.0323228353065659	0.942985460162338	0.625355652923568	-1.26046550939189	-1.25447242323677	-1.05931070525421	-0.308608363408747	-0.704290831648867	-0.768006042553758
ENSG00000215102	TERF1P4	iPSC	1.20741529360903	1.38166732055077	1.50279112453121	0.761554166623731	0.358974172583785	0.124668245895432	-0.966918451665248	-1.11049329275916	-1.13018854508701	-0.413924862644215	-0.673344123485481	-1.04220104815285
RP11-132A1.3	NA	iPSC	1.25050660393663	1.80202352152274	1.11553539485583	0.693711166572298	0.563871476684272	-0.340078779203971	-0.963318088927333	-0.963318088927333	-0.746271085439985	-0.486025943218485	-0.963318088927333	-0.963318088927333
ENSG00000204843	DCTN1	iPSC	-0.247242539806283	-1.19378262945606	1.60745030158725	-0.231211889343323	1.52789294667282	-0.229016384737922	-1.97279295320149	0.786276408193605	0.423941331716672	-0.44650468666353	-0.036558756681897	0.0115488517201596
ENSG00000130294	KIF1A	iPSC	1.54261447434974	0.649965643718649	1.39793714962473	0.490868989439871	0.645167276926168	0.574305071609033	-1.16616026605976	-1.16616026605976	-1.16616026605976	-0.330837206769635	-1.16616026605976	-0.305380334659519
ENSG00000123485	HJURP	iPSC	1.03825269893395	1.12874474238232	1.24837910006857	0.0711076585008019	0.775765371565881	0.0346544581263055	-0.614931169332566	0.234618191336855	0.385829086383845	-1.69037672662697	-1.30515447040341	-1.30688894093558
MATR3;SNHG4	NA	iPSC	1.43319637363565	1.20839309497542	1.62309167680135	-0.0644988132831927	0.762101969286544	0.1275884032967	-1.04922557369938	-1.04922557369938	-0.832178570212035	-1.04922557369938	-0.554449316967957	-0.555568096434337
ENSG00000115392	FANCL	iPSC	0.453830482124439	1.4120187135372	0.37171514161381	1.23499154949335	0.443939388131251	1.12973206759821	-1.23943820747462	-0.117321756729676	-0.097796559518458	-1.33108613551842	-0.945863879294857	-1.31472080396223
ENSG00000143476	DTL	iPSC	1.22510212487162	0.953925547506401	1.03883217996774	0.377555001701053	0.739230048968066	0.963813319072922	-0.879388235666235	-0.101736745898276	-0.467124568998072	-1.44832830941888	-0.953552052687455	-1.44832830941888
ENSG00000187672	ERC2	iPSC	1.48782978576743	1.29991390694045	1.35240731249185	0.210310576130141	-0.477253046310326	0.386213876584113	-1.35425146108468	-0.755535013554661	0.0372521990697545	-0.876959315375832	0.0443226404264334	-1.35425146108468
ENSG00000179915	NRXN1	iPSC	0.806873604622213	1.31335380943355	1.05877616490669	0.779506454708068	0.481639071312226	0.349385146686004	-2.15723165880851	-0.716512140167898	-0.597385653923828	-0.25230527881235	-0.0620439141015225	-1.00405560585464
ENSG00000118785	SPP1	iPSC	1.59888902319206	1.62922003477054	1.33665313914975	-0.669031950598684	-1.06168570641503	-0.891824220148202	-0.0427057503054407	-0.736947663820967	-0.613715882711477	0.230245620813257	0.0629099901601275	-0.842006634085939
ENSG00000164649	CDCA7L	iPSC	1.47168607013909	1.48935902461196	1.40518776839624	0.222547116292912	-0.220397494736485	0.139148663142742	-1.52137810817059	-0.767923442925436	-0.663986343575989	-0.16044468936075	-0.366077932908166	-1.02772063090554
ENSG00000267041	ZNF850	iPSC	1.26279932078038	1.27117874306159	1.2011274696639	0.115863766903733	0.125766269673639	0.0229453880928165	-0.0980960713216334	0.431168014616537	-0.424610473367137	-0.939858425939629	-0.906491913450889	-2.06179208871331
ENSG00000197961	ZNF121	iPSC	1.2365078816096	0.810658423550343	1.16090411252631	0.690836551402302	0.240997041866243	1.12594910474644	-0.310293390859078	-0.532737858500212	-0.564244295105854	-1.28619252374536	-1.28619252374536	-1.28619252374536
ENSG00000124207	CSE1L	iPSC	0.747427903726296	1.22160165174516	1.26439965169484	0.609828119120682	1.23454385261859	-0.0214000831081371	-1.45764257871366	-0.231725790614194	-0.522815340704935	-0.528615331603778	-1.27824153633752	-1.03736051782335
ENSG00000080986	NDC80	iPSC	0.835701924214333	0.0806218477174712	0.768228630297388	0.460565316206807	1.3099052792794	0.769805540180839	-1.52991113657606	0.102964710657036	0.144237588431223	-0.532941478164469	-0.310327011915251	-2.09885121032871
ENSG00000087842	PIR	iPSC	0.590628596074668	0.609478101962046	1.10186024446363	0.588467515390434	1.30133005298262	0.718764358117538	-1.53606202796372	-0.129599643523006	0.137852911493973	-1.00982821069967	-1.52033840358662	-0.852553494711898
ENSG00000146670	CDCA5	iPSC	1.18756610920607	1.18209778185749	1.30738031877982	0.327252593724167	0.70616936324901	-0.142293344298735	0.266528066728341	-0.847919544518455	-0.797403455250459	-1.57704961636661	-0.278440051218249	-1.3338882218924
ENSG00000159228	CBR1	iPSC	1.49030789465723	1.21192965049368	0.93650260516631	0.442622812186023	0.428067044052016	0.701476977872214	-1.38326049893391	-0.490068331461608	-0.525868734339315	-0.905968353225064	-1.38326049893391	-0.522480567533671
ENSG00000183715	OPCML	iPSC	1.68497945770846	1.13322325446383	1.54441883639028	-0.0551821727755128	-0.102427973152428	-0.130830541104083	-1.52094211356131	-0.50036005413395	-0.425717216194923	-0.685619054271181	0.0857422129270771	-1.02728463629626
ENSG00000213988	ZNF90	iPSC	0.69538206302295	0.868351125183569	0.448628733444729	1.06899205865413	0.484755211917053	1.11190600772259	-1.96612716369686	-0.0867314237927133	0.133418468529567	-0.630140857453342	-0.746543039036045	-1.38189118449563
ENSG00000138346	DNA2	iPSC	0.972893311946104	1.29222345948028	1.16325326611706	0.483015432941174	0.867033150307356	0.518882573835478	-1.10050196070806	-1.18320892612204	-0.165674722699339	-0.954467430820665	-0.677826992083232	-1.2156211621941
ENSG00000101447	FAM83D	iPSC	1.04755806937344	0.840511766182899	1.46501869425358	0.777592081732095	0.56313480898238	0.37917586066013	-1.32374023177308	-0.268875350350084	-0.519211817479029	-1.46431630536924	-1.14433918939695	-0.352508386816136
ENSG00000171848	RRM2	iPSC	1.15847613583582	1.37157244893834	1.53240271269891	0.430225657395224	-0.510589348428248	0.67887283344718	-0.70770597813001	-0.545974694665361	-0.482714232279288	-1.20631296530745	-0.528304935753874	-1.18994763375125
CASC5	NA	iPSC	0.319388182247291	1.05559369489662	0.964207032342974	0.970981610559537	0.574023773426607	1.09320204835915	-1.63437214935502	-0.590971714854924	-0.0627326431816844	-0.298385843111505	-1.34079782117525	-1.05013617015379
ENSG00000086061	DNAJA1	iPSC	0.407502341360793	0.314858159267223	0.542013455203096	-0.521197505920627	-0.497272765055075	-0.405957827301435	2.75030863535956	-0.897599140233305	-0.750883398169965	-0.107676716500215	-0.463564549413135	-0.370530688596913
ENSG00000104381	GDAP1	iPSC	1.27318274800924	1.55139315447169	1.16853284501779	0.473244669664723	-0.202803792048841	0.0721133011257002	-0.934844331730295	-0.483202346055585	-0.646392640888345	0.241568946668369	-1.00900814875151	-1.50378440548294
RP4-545C24.1	NA	iPSC	1.01658308299779	1.67471459991801	0.813645781743048	0.540933497770328	0.681441036029774	0.234348015311618	-0.937177248604527	-0.61292515488487	-0.784169093717666	-1.50611732235717	-1.01134106562575	-0.109936128580579
ENSG00000244405	ETV5	iPSC	0.767378923956415	1.15689404786026	1.22612343899756	0.618020710082433	0.432322414499691	0.653887850976738	-1.37245574270044	-0.92081375702573	-1.08400405185849	-0.036469436456922	-1.44661955972166	0.00573516139014663
ENSG00000145386	CCNA2	iPSC	0.900371602827118	1.40061043427701	0.841457608509691	0.317856926911151	0.724755356064529	0.177326628982677	-0.691611831225775	0.187152880394204	-0.101809889897785	-1.53337418584377	-0.428207613781846	-1.79452791721721
ENSG00000103995	CEP152	iPSC	0.99671278874074	1.0703384969767	1.50216416768143	-0.519651896855097	0.333282123809278	0.0200411179471187	-0.664586520479924	0.714234251909075	0.139941893814131	-0.805162594076084	-1.64048565336621	-1.14682817610116
ENSG00000179059	ZFP42	iPSC	1.59000660928199	0.688960814420328	1.10520511458665	0.790222030285444	0.780288446808239	-0.0180611703580311	-0.613270973961722	-0.377148850675519	-0.428100494407079	-1.42893718929842	-1.04371493307485	-1.04544940360703
ENSG00000109861	CTSC	iPSC	0.976901109514506	0.862247061147454	1.02936994123981	0.792909997986547	1.0554051903395	0.726771262550496	-0.707227531063227	-0.686765044484174	-0.677523598945579	-1.16866694455258	-1.33205054605109	-0.871370897681668
ENSG00000111371	SLC38A1	iPSC	1.19119663700226	1.27069289776798	1.05756177435623	0.852786515448241	0.255009286115834	0.622584407920259	-0.437925626466915	-1.22797682763971	-0.929084021113673	-0.784408901823266	-1.13462666642223	-0.73580947514501
RP11-473N11.2	NA	iPSC	1.21008854476479	0.966822371740428	1.07025968787596	0.671897922109225	-0.265897995293296	0.744164878379825	-1.5668786087274	-0.32098765794826	-0.709486844132801	0.178474743423913	-0.411578433464977	-1.5668786087274
SNHG14;SNORD116-13	NA	iPSC	1.0597649787948	1.16611913269219	1.46373579380125	0.394158530746261	0.129149777085125	0.466425487016862	-0.868718867204077	-0.153561475592765	-0.643727121353355	-0.722684337316681	-0.446043898579248	-1.84461800009036
ENSG00000081803	CADPS2	iPSC	1.22983145603882	1.47695066521651	0.627633686770041	1.00212861070387	-0.00813540651569866	0.491580537605596	-0.843563816615342	-1.22074650197161	-0.96207118490703	-0.253553217337384	-1.3246866927702	-0.215368136217586
ENSG00000137124	ALDH1B1	iPSC	1.11459707774312	0.90239043653877	1.33726535467304	0.806456150775602	0.805552052515051	0.187187921032226	-1.03923627654362	-0.324078884932304	-1.03393166900909	-0.449225677265657	-1.15262100749749	-1.15435547802966
ENSG00000166508	MCM7	iPSC	1.34406056392298	0.910995077358454	1.43757772700364	0.502684044635568	0.356729578263702	0.454576674434212	-1.38862488030495	-0.936982894630237	-0.397718949172907	-0.835631291283912	-0.35088062756921	-1.09678502265735
ENSG00000005801	ZNF195	iPSC	1.00850481890618	0.891825410915977	1.31360604407454	0.48193774797039	0.712822414483878	0.580568489857656	-1.35710824188421	-1.03285614816456	-0.215466593928048	-0.180694963485551	-0.770748140374441	-1.43239083837181
ENSG00000132780	NASP	iPSC	1.05803918067851	1.23581612413909	1.38676533770227	0.390917757755465	0.428785085075754	0.73727718731508	-1.00760123782183	-1.07804977691647	-0.813118844144825	-1.04178049130756	-0.563285691665405	-0.733764630810075
ENSG00000224078	SNHG14	iPSC	1.29360900091734	1.09814522304142	1.06583031654304	0.72730299577452	0.258593919440578	0.760898509349736	-1.08077928094057	-1.0189951781562	-0.264943264395125	-0.992270504057292	-0.763226581471209	-1.08416515604623
ENSG00000231107	LINC01508	iPSC	0.703685760737069	1.35387484219941	1.26727049800325	0.477203117231213	0.631501404717509	0.842317591292166	-1.17982613826842	-0.754460905609682	-0.774156157937531	-0.70253399255957	-0.685049881536992	-1.17982613826842
ZNF724P	NA	iPSC	0.884298852958112	1.54243036987834	0.925695863287643	0.769584511210403	0.410205601579654	0.672641934710375	-1.0694614786442	-0.500771136045914	-0.543176655030465	-0.803078493106723	-1.14362529566542	-1.1447440751318
ENSG00000160200	CBS	iPSC	1.18008018836319	0.702347360166828	1.24757977570601	0.448068479772582	0.0829514753868033	0.756933786977491	-2.03351800062625	-0.703886355334008	-0.269068237970611	0.00105996636815409	-1.05942829147753	-0.353120147332654
ENSG00000072571	HMMR	iPSC	0.751483128332986	1.08693490755079	1.16619061320591	0.677047244605202	0.699852007166314	0.864344848427774	-1.1619987452494	-0.710356759574693	-0.530047940265043	-0.370005400192214	-1.23616256227062	-1.237281341737
ENSG00000147224	PRPS1	iPSC	1.19177513285577	1.87781907062933	0.41594858223375	0.475261650923109	0.317389237223752	0.141288230093871	-0.668452011366348	-0.975298763590466	0.117605322862818	-1.09925605159592	-1.35867531243719	-0.435405087832466
ENSG00000177410	ZFAS1	iPSC	1.10026590825097	0.699413754175747	1.33323202915856	0.905094983383324	0.353271132094869	0.122423363811917	0.129408791099597	-0.393567707651464	-0.442783566137645	-0.998964167001954	-1.83428722629208	-0.973507294891838
OPN3;CHML	NA	iPSC	1.01204529642481	1.83411641057152	1.10087990519367	0.0794793565928407	-0.0852999707588515	-0.209466607196869	-0.410381451306668	-0.960915351534216	-1.1692335807056	-0.0253471653831165	0.220403742295431	-1.38628058419295
ENSG00000048162	NOP16	iPSC	0.942095073892232	1.12986281785774	1.42603640211962	0.126686751199594	0.322749126535329	0.151354226044679	0.493598662297857	-1.62560387175871	-0.751626087331775	-1.21564604512732	-0.895668929155027	-0.103838126574215
ENSG00000165732	DDX21	iPSC	1.14390425060416	1.37692134139852	1.43641495276006	0.245945226397141	0.315282229789955	0.246271885051242	-0.352529823855528	-1.28432978656639	-1.14810749685329	-0.409843404201149	-0.947052090022535	-0.622877284502195
ENSG00000175792	RUVBL1	iPSC	1.29060835811163	1.27404697753299	1.5371203404428	0.374289405105372	0.364355821628168	-0.237424483381213	-0.769424257184084	-0.881442441546723	-0.29193623096886	-1.20022829741366	-0.923587858676226	-0.536377333650202
ENSG00000120800	UTP20	iPSC	1.49500697264072	0.925609135797084	1.30432477802081	0.338003934781749	0.201037502436518	0.378950574904417	-0.619943025513004	-1.74731549585752	-0.873337711430586	-0.267754348520095	-0.565996402027876	-0.568585915232218
ENSG00000197024	ZNF398	iPSC	0.668933700748068	0.864063297873613	0.735705076895198	0.506187929755574	0.977637131953279	1.03190070456463	-1.43555665978979	-0.8668663171915	-0.909271836176051	-0.882563070768753	-1.14198233161002	0.451812373745748
ENSG00000145907	G3BP1	iPSC	0.90011297309495	0.838273263010207	1.65557693521991	0.0612380132057391	0.807062624690187	0.472298747263634	-0.506070998950048	-0.373925046833465	-0.393728893446537	-0.850055672562021	-1.53767989578297	-1.07310204890958
ENSG00000112759	SLC29A1	iPSC	1.207012607835	0.905537674512948	1.95133654826489	-0.206586512366567	0.22720086762612	-0.134272271275373	-1.19131327278276	-0.0536828564318244	-0.469365044143249	-0.71402112707391	-1.19131327278276	-0.330533341382517
ENSG00000164109	MAD2L1	iPSC	0.683014716898061	1.37064853000942	0.944706146817276	0.289451483345377	0.837204219206873	0.556861173735848	-1.01881456739798	0.163548543505565	-0.232757233168817	-1.2106188515914	-0.964867943912854	-1.41837621744736
ENSG00000111247	RAD51AP1	iPSC	0.893935909674596	0.640935286790189	1.30404439682362	0.60875622147055	1.17030609791624	0.117720347432743	-1.36827285367712	-0.614818188431965	0.023230806477319	-0.532949794386991	-1.36827285367712	-0.874615376412069
ENSG00000144278	GALNT13	iPSC	0.340349618196958	0.493114134671639	0.802151534651476	1.00281913853956	0.769981418328709	0.598586517838059	-1.60373681262407	-1.00502036509405	-1.19806683229318	-1.12644466691522	0.744218500787042	0.182047813913069
ENSG00000086712	TXLNG	iPSC	1.17792409497346	1.56276809946645	0.894083911855187	0.174610335264266	0.683472261462731	0.19927781010935	-1.43410544660013	-0.757154569573639	-0.703702503267103	-0.257692168201466	-1.14053111842036	-0.398950707068736
ENSG00000124795	DEK	iPSC	0.978028339058532	1.16132700647714	1.13666114159013	0.539349238255924	0.772925145138588	0.390709174629113	-0.477110040422621	-0.750118054021177	-0.487397967281809	-0.891185435215351	-0.706491542697402	-1.66669700551106
ENSG00000163918	RFC4	iPSC	0.61537414687219	1.05047804550582	0.905934850177098	0.540938263144406	0.563743025705518	0.443995686644377	-0.31431009745959	0.334768120522903	0.104665172144144	-1.86704780046285	-1.37227154373142	-1.0062678690626
ENSG00000172554	SNTG2	iPSC	1.14654176450137	1.42686916836309	1.07344073807891	0.74811985323104	0.0365328880060236	0.0852410290030599	-1.49065667760558	-0.353026261254648	-0.918197767513808	-0.129723258795746	-0.628142275673168	-0.996999200340535
ENSG00000139618	BRCA2	iPSC	0.546197090852366	1.25343761995792	0.716264156001262	1.18454737480056	0.536703163484346	0.304302158918266	-1.51190399049216	-0.266013039713019	-0.654512225897559	0.0540057416720869	-1.51190399049216	-0.651124059091915
ENSG00000174371	EXO1	iPSC	1.24711827681626	1.57737788407276	0.843115100506037	0.614882608847535	0.248554296216421	0.0131244598391351	-0.99383317301686	-0.669581079297203	-0.467548349403124	-0.440839583995826	-1.56277324676951	-0.409597193815631
ENSG00000155886	SLC24A2	iPSC	1.04334142581578	1.13797260297804	0.830610758118066	0.867004966802265	0.852449198668257	0.527114856792188	-0.958878344317671	-0.958878344317671	-0.958878344317671	-0.958878344317671	-0.464102087586244	-0.958878344317671
ENSG00000182287	AP1S2	iPSC	0.882169037621617	1.18884426022131	0.807444718191889	0.830968892103271	0.572601898163786	0.682762173268737	-1.11077569744209	-1.08099932366472	-0.288212111040303	-0.113806039030495	-1.18493951446331	-1.18605829392969
CTD-2291D10.4;ZNF730	NA	iPSC	0.504365788810725	0.772892796787361	0.644534575808946	0.685405139876914	0.924155214737873	0.940730203478375	-2.09566723462869	-0.483326726375941	0.097077224200163	-0.350313882477375	-0.940367059366265	-0.69948604085209
ENSG00000170571	EMB	iPSC	0.216261569757493	0.240355418362535	0.556852174496747	1.04209845872744	1.55123624479599	0.893891739892908	-1.46858620457057	-0.715131539325415	-0.487382464149756	-0.991294058861718	-0.973809947839139	0.135508608713475
ENSG00000138658	ZGRF1	iPSC	0.902740559887125	1.14356555289233	0.868138507564958	0.845788095506362	-0.0331104561263866	0.633112880270862	-0.882684522782617	-0.313994180184331	0.328802950645076	-1.45162459653526	-0.58911019460285	-1.45162459653526
MTAP;RP11-145E5.5	NA	iPSC	1.02082462020142	0.907229067972267	1.4016013267255	0.650938279103828	0.518753749740269	0.23569218077646	-0.412252377676983	-0.630217977580595	-0.36062391134634	-1.71010023579266	-0.882045056531343	-0.739799665591826
ENSG00000154096	THY1	iPSC	1.31056272148236	0.965405705527279	0.383340073257237	1.00324838518748	0.767525108045902	0.696662902728767	-1.04380243494003	-0.61843720228129	-0.826755431452677	-1.04380243494003	-1.04380243494003	-0.550144957674979
ENSG00000170144	HNRNPA3	iPSC	0.646661874625028	1.1960304794002	1.04705892071427	0.975174049621319	0.432827587818944	0.606450852284256	-1.13698822477726	-0.39918257151352	-0.792764970476631	-0.52502020582664	-1.56743218389039	-0.482815607979572
ENSG00000115541	HSPE1	iPSC	0.898259509308454	1.5966694842486	1.45448721192252	0.241720873093354	-0.165648297617704	0.0763643332867456	-0.291204076981037	-0.690970270554278	-0.383271559289576	-1.58416243802658	-0.428862262764162	-0.723382506626341
RP13-941N14.1	NA	iPSC	1.02549185502921	1.02941983133673	0.946929078511667	0.284195229911076	1.05795680057981	0.443372123821866	-1.37283402558855	-0.479641858116251	-0.171943146851549	-1.37283402558855	-0.878057768857128	-0.512054094188314
RP5-857K21.4	NA	iPSC	0.806244121804958	2.47053393549844	0.201645664217037	0.297444706781325	-0.505137137388297	0.0557350318730521	-0.320814337025427	-0.642808000230826	-0.661960083578657	-0.651512289814133	-0.109401678531143	-0.939969933606329
ENSG00000008083	JARID2	iPSC	1.11525651369133	1.09320794592897	1.27903240484395	0.284436087676933	0.280341860996247	0.491957416530749	-1.55453392617049	-0.844331920597994	-1.01830694363058	-0.824033349368133	-0.048155549092912	-0.254870540808069
GGCT;RP4-777O23.3	NA	iPSC	1.04081453592431	1.4185700671303	1.05998222245354	-0.361678514854777	0.257132118192343	0.2433253854795	-0.511813265874619	-0.273693362280547	-0.33492970334031	0.132748200434282	-1.98073302653487	-0.689724656729158
SNHG14;RP11-701H24.8;SNORD109A	NA	iPSC	1.24007629818989	0.863049584529076	1.09539897346488	0.0958635949952087	0.342629100766315	0.893779502243861	-0.899758368466966	-0.222807491440475	0.00943039838057613	-1.46869844221961	-0.973922185488186	-0.975040964954566
ENSG00000110092	CCND1	iPSC	1.56912488959363	1.040513077515	1.48243295769918	-0.237907772807772	-0.476899702149307	0.245512507775936	0.0986759021250689	-0.721752212196123	-0.640218647986364	-0.682394465518215	-0.388753223497263	-1.28833331055377
ENSG00000013573	DDX11	iPSC	1.24436459720969	0.90546578692515	0.815397834584506	0.659286482507266	0.682091245068378	0.711452838515415	-1.17975950734734	-0.307980062459369	-0.767495840679175	-0.91337652180986	-1.25392332436856	-0.595523528146109
ENSG00000052749	RRP12	iPSC	1.35608093161652	1.05063051625826	1.24502424873435	0.283444526724396	0.441572920058058	0.294780196118217	-0.712177436737778	-0.682401062960406	-1.06407050700308	-0.803825364781577	-1.28111751049042	-0.127941457536549
ENSG00000138442	WDR12	iPSC	1.0188679504596	1.33077169138732	1.2870285810266	-0.889977168253318	0.324201285409185	-0.334294296110094	-0.431447507521772	0.365657622090671	-0.0138241468585032	-0.363472449757481	-0.569105693304897	-1.72440586856732
ENSG00000163931	TKT	iPSC	0.753511132765094	0.468735851073522	1.26865711622532	0.293138976056179	0.969807154334517	0.550841293622254	-0.407748084186832	0.157822700454486	-0.269291452133392	-0.746062612335411	-1.56106450366185	-1.47834757221389
ENSG00000256661	A2ML1-AS1	iPSC	0.382471374753792	1.11837663446161	-0.106670951656402	0.946407110980244	1.09731458451843	1.34720992784186	-0.797518113483254	-0.797518113483254	-0.797518113483254	-0.797518113483254	-0.797518113483254	-0.797518113483254
ENSG00000082516	GEMIN5	iPSC	1.2704741387706	1.08124272073235	1.13092383732712	0.417088819857272	0.620596197750491	0.481662426889775	-1.01535971782126	-0.757396277548334	-0.941112819668087	-0.608918562452932	-0.838171449822618	-0.841029314014386
ENSG00000147874	HAUS6	iPSC	0.920826883991284	1.24363926903339	1.21122505536371	0.340308696020528	0.546078067035301	0.589046639546707	-0.174570530677514	-1.06828617945341	-1.05355759046634	-0.929058757650515	-0.738797392939687	-0.886854159803446
ENSG00000160131	VMA21	iPSC	0.865339636792744	1.20855457821047	1.34415942496429	0.0249125847224612	0.749267484716703	-0.0339726932325757	-0.77315842159349	-1.23075710757691	-0.0744493130374897	-0.225508925661723	-1.48258418652765	-0.371803061776834
ENSG00000155511	GRIA1	iPSC	1.48359105407683	0.838167520587544	1.40391830748916	-0.870774102345557	-0.596795697409596	-0.426934211142773	-0.870774102345557	-0.272057654815538	-0.870774102345557	-0.870774102345557	0.527799999165556	0.525407091431038
ENSG00000117877	CD3EAP	iPSC	1.04125265352927	0.750364268331241	1.23639259267583	0.479009345224094	0.426144917364198	0.838015977606544	-0.487572290414948	-0.913781300930703	-1.40298109985671	-0.694463132287066	-0.165185119744318	-1.10719681149743
ENSG00000262801		iPSC	1.00443303302362	0.659276017068537	0.780429201450815	0.827723732218274	0.623835653776719	0.606778466705229	-1.34993212339877	-0.00334055987816129	-0.254707226032385	-1.34993212339877	-0.194631948136347	-1.34993212339877
ENSG00000165671	NSD1	iPSC	0.754556586287845	0.579142673178746	0.779827734464146	1.07502198752545	0.273325436399976	0.749284655948443	-1.72410790349604	-1.48798578020984	0.14566693736116	-0.607427963321891	-0.267010604284748	-0.270293759853255
ENSG00000151725	CENPU	iPSC	0.912387833316602	1.15950704249429	1.3200645777262	0.323342426469313	1.02453419440403	0.00782146910126791	-0.843948211178302	-0.79031500870324	-0.577060567339161	-0.570996840059604	-0.981606396961427	-0.983730519269971
ENSG00000226361	TERF1P5	iPSC	1.43404587023999	1.47143958629239	0.89097676079907	0.00581526795548237	0.571942978935415	-0.0625705870544286	-0.670444490297866	-1.01108153092551	-1.02233756056316	-0.117450901276832	-0.744608307319086	-0.745727086785466
ENSG00000004478	FKBP4	iPSC	1.36705564740466	1.42164092986929	1.17429767250723	-0.0621750934337006	0.0543834763912221	-0.409145173276507	0.450791684611167	-0.89930408597569	-0.776289536802056	-0.795196562934524	-0.545291880196022	-0.980767078165076
ENSG00000205268	PDE7A	iPSC	0.573762694433485	0.188191694394155	0.692420793834992	0.787792112391161	0.0651085242739358	1.02945109592393	-1.90865925290155	-1.01546708542925	-0.128231705721211	-1.07333619361143	0.0413295891334498	0.74763773327833
ENSG00000056487	PHF21B	iPSC	1.2576767161798	0.0361023193982803	0.366609334377734	0.836379910709701	1.11166850492056	0.944088312368161	-1.14064916443796	-0.715283931779228	-0.923602160950616	-1.14064916443796	0.0146510108244557	-0.646991687172918
SNRPN;SNURF	NA	iPSC	0.0873543700035295	0.779180328838696	1.18735256896954	0.832756286703015	1.36481190439773	-0.059254713500037	-1.52407024783609	-0.562423456688002	-0.148542902902561	-0.768434530717884	-0.157485624923439	-1.0312439823445
ENSG00000121766	ZCCHC17	iPSC	-0.121261601217253	0.103416699320388	1.12418727941137	-0.964524340361645	1.11395582228151	-0.227960950685312	-0.147113227528674	0.99906444791031	1.01643123234661	-0.684930928996128	-0.641760082733978	-1.5695043497472
ENSG00000151952	TMEM132D	iPSC	0.793698761548972	1.12668014762486	0.11464856562307	0.709145853814303	1.07006894979062	0.789197295976579	-0.492610868916454	-1.043144769144	-0.896051091710965	-0.633186942512614	-0.0699359002916253	-1.46851000180274
ENSG00000196247	ZNF107	iPSC	1.05627984983182	1.16537883597516	1.05416388299885	0.807754108115482	0.242337807424001	0.163711258832743	-1.65249489057768	-0.406603939798542	-0.557269993211296	-0.291561471767843	-0.789980488645265	-0.791714959177438
CTD-2561J22.5	NA	iPSC	1.00382386501587	1.34257454043894	0.436435027998478	0.339398473780798	0.592533444332119	-0.0220512324258229	-0.86235824894996	-0.700626965485311	0.590287945515915	-1.83825738183624	-0.439683280325131	-0.442076188059649
ENSG00000277586	NEFL	iPSC	1.20450410269948	0.443289358261767	1.2136072589395	0.50716820177672	0.823906723452575	0.590604283945881	-0.580920979970264	-1.14986105372291	-0.932814050235563	-0.314537994432786	-0.655084796991484	-1.14986105372291
ENSG00000162687	KCNT2	iPSC	0.838667309768496	0.871972650379737	0.763942990338768	1.01616471062755	0.396537472908239	0.736934920567542	-0.747318366161574	-1.72321749904786	-0.865825734453261	-0.601283836274178	-0.116533172559475	-0.570041446093982
ENSG00000077684	JADE1	iPSC	1.12289186589081	0.954484720503641	1.08310980043764	0.530037093150288	0.323388449012854	0.424093962086641	-1.28732103132058	-1.13955987372551	-0.943097777019954	-0.834926040214816	0.254943990590592	-0.488045159391609
ENSG00000175161	CADM2	iPSC	1.48385773867517	1.71521932798426	0.816628611286858	-0.168613943015592	-0.450760522519728	0.134060402567331	-1.15334070343178	-0.727975470773047	-0.747670723100896	-0.318017644141658	-0.290826301499369	-0.292560772031542
ENSG00000144749	LRIG1	iPSC	0.487896922703988	0.230382713577305	0.313625189122681	1.03289960281226	1.11566563177731	0.966166243881727	-0.890569100832117	-0.337387749386653	-0.388339393118212	-0.744534570944721	-1.8664682337184	0.0806627441248313
ENSG00000234741	GAS5	iPSC	0.988467021399527	1.24167335766346	1.04755193780626	0.545270027641977	0.441687316640587	0.193940892992495	0.177188623122534	-0.939080980699546	-0.539336601444313	-1.08297419199013	-1.1988935877449	-0.875493815387944
ENSG00000198780	FAM169A	iPSC	0.439999336355787	0.396640491590669	0.564602712725242	0.830477803152796	0.847587348739951	1.01251190421406	-2.16414078021928	-0.144167592541371	-0.164691009697767	-0.612281911689323	-0.501519057176701	-0.505019245454065
ENSG00000198042	MAK16	iPSC	1.09648842159025	1.15863972496584	0.84201791234771	0.45556953590842	0.133393013101981	0.483272669393534	0.106289838255639	-1.30723381793439	-1.35223388997652	-0.254090377413116	-0.205169455302417	-1.15694357493693
ENSG00000168004	HRASLS5	iPSC	0.0889619831725934	0.27883839721195	0.53552718316997	0.989245894316739	1.35016899029305	1.2237316671915	-1.1884099613003	-0.434955296055153	-0.615951051208529	-0.711117815591455	-1.1884099613003	-0.327630029900062
ENSG00000189057	FAM111B	iPSC	1.10407850280302	1.24979881207907	0.71611728787453	0.969209218551922	0.293160756838358	0.279581249403372	-1.00781985659574	-1.00781985659574	-0.435360946503969	-1.00781985659574	-0.145305454663329	-1.00781985659574
ENSG00000184613	NELL2	iPSC	1.29833479058385	1.29374469590695	1.35588913133236	0.15695978374325	-0.459736522137571	0.212940004228222	-0.394933899015215	-0.963873972767861	-0.963873972767861	-0.963873972767861	-0.101359570835447	-0.470216495502815
ENSG00000139343	SNRPF	iPSC	0.990754305486608	1.33257290709617	1.09674916446284	0.554022584599775	0.419505814427898	0.307550070827474	-0.66252265823409	-0.684600306532193	-0.430737696706784	-1.26448006004272	-0.941284789961325	-0.717529335423646
ENSG00000183337	BCOR	iPSC	0.7032692533992	-0.23187762216332	0.443562463800131	1.33075310367584	0.778929252387383	0.849078191779753	-1.40862910599956	-0.655174440754414	-1.40862910599956	0.157280626164678	-0.546114704067151	-0.0124479122229695
ENSG00000214029	ZNF891	iPSC	1.01012330344602	1.39578731141087	1.19115179968753	-0.459390456293574	0.817951810962439	-0.89749572542615	-0.955943437595058	-0.717823534000986	-0.144658223157738	0.159386514554481	-0.571684141575624	-0.827405222012216
ENSG00000165349	SLC7A3	iPSC	1.49669129714444	1.71654096449436	0.967951505171483	-0.615207062254326	-0.111069611624036	0.00803224746903597	-0.615207062254326	-0.386904029129324	-0.615207062254326	-0.615207062254326	-0.615207062254326	-0.615207062254326
ENSG00000179761	PIPOX	iPSC	0.916760268291707	0.903812276745559	1.27072933529101	0.260221632076607	0.408106098132158	0.745381808063894	-0.272703317997784	-0.96694523151331	-0.584457938622519	-1.56566167904333	-0.410361503780909	-0.704881747643088
ENSG00000002746	HECW1	iPSC	0.98375390981195	0.955562226935785	0.466809987188187	0.604229516205746	0.667916508000807	1.18439552031604	-0.960332521009075	-0.960332521009075	-0.554662540678188	-0.960332521009075	-0.960332521009075	-0.466675043744029
AP002954.4	NA	iPSC	0.879920196128764	0.705349920056377	0.0494532168914104	1.11023906553479	0.523597862734882	1.35888624158675	-1.00359170287672	-1.00359170287672	-0.597921722545836	-1.00359170287672	-0.508815446145297	-0.509934225611677
ENSG00000144554	FANCD2	iPSC	0.979214051931729	1.09432285129823	0.944611999609562	0.368774119972838	0.51968159351102	0.646992625069924	-1.37515110449066	-0.62169643924551	0.102977736109529	-0.897858958781812	-0.880374847759233	-0.881493627225614
CTD-2142D14.1	NA	iPSC	1.4808106654401	1.09523966540077	0.910670709068178	0.358079426874812	0.525578283716666	0.0554297196124454	-1.00161128189494	-0.773308248769937	-1.00161128189494	-1.00161128189494	-0.506835025163512	-0.140831350494698
ENSG00000138778	CENPE	iPSC	0.580968370680776	0.829979874368295	0.948682941391057	0.991904853734891	0.524162637589526	0.880744181820058	-1.47327070230649	-0.797306796347046	-0.919181591162502	-0.717634985188285	-0.53912882851643	-0.309919956063853
ENSG00000130413	STK33	iPSC	0.777142930246489	1.24439711590192	0.744892474831675	0.678357820733465	0.497613590661517	0.515388497781827	-1.22507683988697	-0.996773806761964	-0.819406859556079	-1.22507683988697	-0.362562437954552	0.171104353889629
ENSG00000165821	SALL2	iPSC	1.34695266352872	0.378218266697046	1.19095620198791	0.144758563482119	0.312257420323973	0.807211584272952	-1.21493214528763	-0.98662911216263	-0.642473235195858	-1.21493214528763	-0.0596319700252121	-0.0617560923337566
ENSG00000129534	MIS18BP1	iPSC	0.668359584278945	1.11467463034658	1.17326134125104	0.664153468582413	0.387837871973132	0.279678241158424	-1.41021207333023	-0.0531121319992014	0.00399429609051438	-0.783708046928794	-0.867762031626489	-1.17716514979634
ENSG00000204442	FAM155A	iPSC	1.15450486988552	1.20560430498769	0.951338259279329	0.263548913549125	-0.16390007430157	-0.0870594526382611	-0.682269256241952	0.11483587337049	-0.00351464468050855	-0.409317885123255	-0.368543290799114	-1.9752276172875
ENSG00000112081	SRSF3	iPSC	0.560328952011558	0.975865078435843	0.8790792809436	0.507304650245567	0.791595027918605	0.513455008398319	0.507663226394206	-1.5764765866385	-0.856762699571137	-0.604415746702976	-0.812785212183741	-0.884850979251343
ENSG00000196584	XRCC2	iPSC	1.44834938525377	1.05522145326844	1.1647650843909	-0.194041133924113	0.557840845732462	0.316140682319668	-0.860673294676416	-0.261956847146397	-0.643626291189067	-0.860673294676416	-0.860673294676416	-0.860673294676416
ENSG00000125630	POLR1B	iPSC	1.14422663348653	1.38325617564025	1.36013950441433	0.0932591015808679	-0.128153798602042	0.119870600549093	-0.139163103881045	-1.11822510612979	-0.778517077590066	-0.993034892606163	-0.331844389934801	-0.611813646927173
ENSG00000198157	HMGN5	iPSC	0.849015864607938	1.16955251282413	0.979232051251326	0.422100513317477	0.600176333622104	0.444121268518061	-1.21826276539449	-0.876428004607636	-0.589104416959448	-0.037493801100994	-0.346735399829444	-1.39617415624903
ENSG00000188322	SBK1	iPSC	0.555105148151298	0.119812853244075	0.450319868223529	1.40331036810099	0.83789406740951	1.20076866718715	-0.487998556839523	-1.05693863059217	-0.839891627104822	-1.05693863059217	-0.562162373860743	-0.563281153327123
ENSG00000105993	DNAJB6	iPSC	0.698876776520992	0.820676042165391	0.742883079245671	0.768884106965795	0.513268419915669	0.582426200762447	-0.0546734637352113	-1.18500758637263	-0.422352672040447	-1.87876501141425	-0.618900325997385	0.0326844339839525
KIAA1524	NA	iPSC	0.956331470096736	1.0259091456267	1.22475358472043	0.28168708601298	0.719313866352916	0.398205874632955	-1.24694611314698	-0.449840983534534	-0.69285700200299	-1.17897105538269	-0.589915632157521	-0.447670241218004
ENSG00000198146	ZNF770	iPSC	0.576460962213615	0.934035206137277	0.937569017808122	0.81721231491658	0.876373420171581	0.65235984510625	-1.30750312066388	-0.417902633846229	-0.425109111519611	-0.825736381324836	-1.04515071568518	-0.772608803313692
ENSG00000187514	PTMA	iPSC	1.18597735044194	1.21705716860275	1.3696517230323	0.0548992539237911	0.00898122759767084	0.238056155773327	-0.113812232515774	-0.903419137814954	-1.21222338144433	-0.753044264898321	-0.339712509903201	-0.752411352795197
ENSG00000136098	NEK3	iPSC	0.536912920628571	1.50392015003979	1.30678419865884	-0.556078015724284	-0.149722206623791	-0.286800199778173	-1.6769117722354	-0.65632971280804	0.463667807690588	-0.31597835342556	-0.278337670724283	0.10887285430174
ENSG00000146263	MMS22L	iPSC	0.702353584460564	0.577849437566931	0.720723855744803	-0.176879825437598	0.395807187966391	0.26092070957156	-0.517910019812755	0.202249509480731	1.02098995148652	-1.81341844814027	0.0572447195619938	-1.42993066244887
ENSG00000228253	MT-ATP8	iPSC	0.878819945440233	0.614550606916328	0.627180216687647	0.719148547014989	-0.536550086358223	0.858105489455346	-1.01606718168039	-1.76828569628939	-0.878141384821739	-0.180610272016169	0.409947604582289	0.271902211069075
ENSG00000119335	SET	iPSC	0.911789848323895	1.23614007283932	0.855682703621177	0.425599806041176	0.669877633512818	0.545504062650586	-1.1523827854209	-0.835119868799275	-0.838725821115514	-0.412820117332098	-1.1366591610438	-0.268886373277383
RP5-857K21.4;MIR6723	NA	iPSC	0.0270378325874754	2.36048535509139	-0.113982244078281	-0.459209189052196	-0.935928259626742	-0.00951149134859852	-0.366988185874096	-0.510563026968006	0.264962619110264	-0.935928259626742	0.219371915635678	0.460252934149853
ENSG00000132646	PCNA	iPSC	1.0918095767568	1.20669214760759	1.30216686994525	0.523097305181815	0.287166130484339	0.124086340388567	-0.750568514006952	-0.886718076990591	-0.649371575352697	-0.985145489461967	-0.685784254214607	-0.577430460337535
ENSG00000165379	LRFN5	iPSC	0.256917887633922	0.82967350025352	-0.0951427348515317	1.53262985738581	0.364092103217519	0.961146636489243	-1.24960492681483	-0.878912496180508	-1.2443003192803	-0.320577679704951	0.122451253709995	-0.278373081857882
RP5-857K21.6	NA	iPSC	0.316732182118102	0.190763321945075	0.376880622528359	0.983011699638951	0.0737064609304605	0.701972059823888	-0.311888055071425	-2.22035298077294	-1.04260964685521	0.420768220469134	0.45486209468799	0.0561540205576208
ENSG00000058804	NDC1	iPSC	1.06539747805752	1.17416730571517	1.1003936081048	0.0498521469556712	0.899192110028262	-0.198520892472625	-0.736763805543487	-0.818507855082252	-0.170769342347428	-1.38763071680617	-0.414376634872856	-0.562433401736615
ENSG00000173145	NOC3L	iPSC	1.14276113733878	0.7138554075061	1.30183700546257	0.0648614994695356	0.404710705891912	-0.296577641120566	0.20082547158488	-0.502124908542335	-0.125564472709899	-0.347091759516274	-0.661542316028974	-1.89595012933572
ENSG00000105426	PTPRS	iPSC	1.09570385189977	0.582211587012116	0.703364771394394	0.686834214956329	0.760561804931759	0.461171611194048	-1.42699655345519	-0.82828010592517	-1.42699655345519	-0.305062890681508	-0.271696378192769	-0.0308153596785936
ENSG00000183943	PRKX	iPSC	0.499228830057638	0.630506965507988	0.78435037044822	0.280140996515373	1.00193941411653	1.3209978612241	-1.18561894427042	-1.18561894427042	-0.779948963939533	-0.350295884980296	-0.690842687538994	-0.324839012870179
ENSG00000123737	EXOSC9	iPSC	0.939534241754428	1.32776482349191	0.96978790389223	0.0112287502728527	0.915998939022903	0.175648000533046	-0.764457442010875	-0.638089968744563	-1.33664979924812	-0.318515158182858	-0.77816461736755	-0.504085673413411
ENSG00000100029	PES1	iPSC	0.942859488327767	0.761082484263179	1.3578595756974	-0.368347724378623	0.418210004194107	0.0540604994848204	-1.83410766516442	-0.81352560573706	0.137605307442573	0.0708187148317476	-0.0455834667509558	-0.68093161221054
SNHG14;RP11-701H24.4;SNORD116-20	NA	iPSC	0.898332463173062	0.416914152152826	0.860373652674336	0.865093833445854	0.0740416720837533	1.33854309688149	-1.20237686438849	-0.565935489022025	-0.267549626379763	-0.612366265110527	-1.02297582201235	-0.782094803498175
ENSG00000068878	PSME4	iPSC	0.145579018292333	1.12418469364484	0.392293908606486	0.901530347386357	0.653988035511691	0.827611299977003	-1.23288700524377	-1.45533147288491	-0.817282477975622	0.303577103995108	-0.420261939716597	-0.42300151159292
ENSG00000226071	HLA-DPB2	iPSC	0.967738439835795	1.00012128877517	1.16308002461347	0.443917249600058	0.895554083816235	0.141267542337692	-0.915773459169693	-0.915773459169693	-0.510103478838805	-0.438481313460845	-0.915773459169693	-0.915773459169693
ENSG00000173473	SMARCC1	iPSC	0.94464004723808	0.792712178483713	0.796870414595112	0.580617702494014	0.518118578479826	0.747104487562424	-1.03632756701894	-1.09571312073103	-1.36284196906444	0.207040518490315	-0.437054296626011	-0.655166973903053
ENSG00000101361	NOP56	iPSC	0.936133266261876	0.672689496904309	0.947130891797455	0.494545860611042	0.293742602528994	0.512937546317235	0.299731417650944	0.0606944291141653	-0.334109978169354	-1.40951328977424	-1.38232194713195	-1.09166029611049
ENSG00000114279	FGF12	iPSC	1.02385480880653	0.566129424745764	0.614824513192999	0.684069058741207	0.506411338655679	1.02431028478764	0.159456940735942	-1.0146271857704	-1.20767365296953	-0.778020574010294	-1.11856737656899	-0.460167580346543
RP1-293L8.2	NA	iPSC	1.17211581777273	0.930140646206612	1.43377784052843	0.234848492939315	0.532528876837081	0.0404315047063473	-0.885985263571797	-0.885985263571797	-0.885985263571797	-0.408693117862949	-0.39120900684037	-0.885985263571797
ENSG00000151835	SACS	iPSC	1.30441676202758	1.08068777782744	0.395302006551844	0.0268928829841619	0.264696325486211	0.732341571948005	-1.63013637251547	0.1355625856778	-0.429245493778463	-0.269202953705633	-0.474836197253049	-1.13647889525042
ENSG00000175832	ETV4	iPSC	1.02513045676674	1.14023925613324	1.11786193661602	0.327794555843986	-0.0282540862215437	0.627475890448352	-0.35333556676936	-1.10093166653064	-0.75677578956387	-0.49391164036552	-1.32923469965564	-0.176058646701769
ENSG00000182050	MGAT4C	iPSC	0.805290204039045	0.161759560413893	0.492266575393347	1.22378460741427	0.28598869001175	0.941718666681645	-1.01499192342235	-1.01499192342235	-0.442533013330577	-1.01499192342235	0.591692403066032	-1.01499192342235
ENSG00000116560	SFPQ	iPSC	0.330795512081528	-0.00141768471209591	0.18816508696076	0.659889273888631	0.81928122681804	1.01305864256352	0.645363612889039	-2.00385077157213	-1.08702736063841	-0.32512946820618	-0.191606566831517	-0.0475215032411826
ENSG00000166532	RIMKLB	iPSC	0.314356235289937	0.732571171149041	0.619357883830887	0.880017628796589	0.620626937160713	0.767211341298567	-1.38870760521119	0.197258787589582	0.285207334246499	-1.25658179925139	-0.702043968626195	-1.06927394627304
ENSG00000171649	ZIK1	iPSC	1.20818527613896	0.800547609478474	0.578387175394273	0.695706444594817	0.518048724509288	0.138759090221984	0.361989769944867	-0.848251582201659	-0.8797580188073	-0.766383188156684	-1.60170624744681	-0.205525053670214
ENSG00000125166	GOT2	iPSC	0.973193377020771	1.07319465827519	1.40686505340089	-1.03186839858	0.112339672622565	-0.596357880859788	-0.766075510786695	0.0360539067944599	0.752604286825946	-0.625812548713494	-0.570908206297276	-0.76322840970256
ENSG00000162601	MYSM1	iPSC	0.932970976390056	1.0827756797196	0.665571786268641	0.719573033431885	0.645070395551762	0.207499547606983	-1.41619075982288	0.00937573443992878	-0.455185401232039	-0.301479420130841	-1.08591662045541	-1.00406495176768
ENSG00000184903	IMMP2L	iPSC	1.03130060657125	1.48945625899319	0.966126595717338	-0.579547913090787	0.074447118079517	-0.229101704466159	-1.0694087209903	-0.140997390196994	0.547546511950133	-1.20998479458646	-0.438623527388197	-0.44121304059254
ENSG00000262473	GART	iPSC	1.05425119087901	0.965603016542712	1.53295328867196	0.102024340898709	0.252437864922268	0.105587286066847	-0.68626865730657	-0.922313626161064	-0.417689920398533	-0.0753959992939022	-1.18593421659543	-0.725254568226008
ENSG00000172115	CYCS	iPSC	0.896307135214137	0.841697762829771	0.367625817645718	0.365188250421678	0.726111346397991	0.55001033926811	0.151228412196312	-0.121411080697768	-1.24000869510359	-0.0671142530440529	-0.657167429932943	-1.81246760519536
ENSG00000196787	HIST1H2AG	iPSC	0.811717255571444	0.933089232273105	0.832469658010087	1.26430083752493	-0.21379778021104	-0.069569848776994	-0.677443752020431	-0.647667378243059	0.145119834381357	0.114549593036758	-1.24638382577308	-1.24638382577308
ENSG00000239672	NME1	iPSC	1.2648390437478	1.33943895127372	1.22822399829741	-0.357601018768006	0.244255655269365	-0.0883232028218948	-0.909494701526471	-0.724980110033968	-0.277543896542112	-0.117501356469282	-0.983658518547691	-0.617654843878877
ENSG00000164104	HMGB2	iPSC	0.189159945909268	0.200989692793216	0.444043553178965	0.879648296696054	1.22461467368475	1.07412198294861	-1.18724379502181	0.28576654578484	-0.55938289033051	-1.15983935189551	-0.510986960447731	-0.880891693300137
ENSG00000128692	EIF2S2P4	iPSC	0.967581538327808	0.415825335083173	0.85324663778461	0.321076493593557	0.247351269146652	0.766033321510805	-0.685602329938707	-1.81297480028323	-1.03744915420496	0.544471934985982	-0.288351190906962	-0.29120905509873
ENSG00000089009	RPL6	iPSC	1.24639596739657	1.18090022660337	0.945631979191753	-0.207257537598808	0.100777908872764	0.372860502165746	-0.101742339597086	-1.6314587279707	-0.60448584603551	-0.0858790019154396	-0.43492455118085	-0.78081857993181
MSANTD3-TMEFF1;TMEFF1	NA	iPSC	0.75350093405408	0.966839982344298	0.722180604848288	0.917039855176094	0.397178600660198	0.892132764609177	-1.13001096495141	-0.376556299706257	-0.72434098462052	-0.65271881924256	-0.635234708219981	-1.13001096495141
ENSG00000167600	CYP2S1	iPSC	1.46161576437618	0.839098256480948	0.871558125713507	0.379436450714291	-0.0250626498855926	0.340439974446435	-0.00451877303716763	-0.516911889371207	-0.523353800080348	-0.25429507878664	-1.05724905351795	-1.51075732705246
ENSG00000166197	NOLC1	iPSC	0.971254360545256	1.08291220424345	1.3767745667619	-0.122706740202208	0.400568029701116	-0.603913282833413	0.23929517472533	-0.38935541793455	0.00842589510832514	-0.674766080092524	-1.02154533073272	-1.26694337928996
ENSG00000149554	CHEK1	iPSC	0.995447925427547	1.34185074497268	1.09170834969782	0.0305984094815437	0.0980007280039734	-0.0528000436686269	-1.71332681498195	-0.692744755554598	-0.0761451996357816	-0.147417082817712	-0.558026639719534	-0.317145621205359
ENSG00000179041	RRS1	iPSC	1.26111350320074	0.423411315953402	0.690028681320104	0.565336899494318	0.137887911643624	1.1222500595354	-0.69754049845602	-1.24807439868357	-0.692235890921494	-0.107529899178061	-0.274865529831191	-1.17978215407726
ENSG00000153093	ACOXL	iPSC	0.309348563799166	0.135504361440327	0.28540760320347	1.24318984397364	0.940686618548047	1.38706637334144	-0.87064092443788	-0.642337891312878	-0.653593920950532	-0.393348778729032	-0.87064092443788	-0.87064092443788
ENSG00000132688	NES	iPSC	0.734777457524965	0.247025210979928	0.07679254317451	0.918573342226992	0.695458096007814	1.31820405964756	-0.00350471586913415	-0.75759528515615	-1.08578489075089	-1.45135271019777	-0.498151571074438	-0.194441536513381
ENSG00000123104	ITPR2	iPSC	1.31659112382227	1.12279533223399	1.17348307572903	-0.28042219031376	-0.870607976339278	-0.0198859575278085	-0.837460109511602	-0.905787144835457	-0.729096292187452	-0.592772277917227	0.371984532948972	0.25117788389832
ENSG00000112379	ARFGEF3	iPSC	0.625663859307547	0.880214788281976	0.224318085117009	1.28510393376039	0.472253778782976	1.05944132999811	-0.828726834651125	-0.403361601992389	-0.828726834651125	-0.828726834651125	-0.828726834651125	-0.828726834651125
ENSG00000123213	NLN	iPSC	1.0002300160715	1.35817353631692	0.749909710009365	0.729329814820933	0.196735587378961	0.36789564585592	-0.252734760460913	-1.00682532974793	-0.976059809194991	-0.487311735915928	-0.929221487591294	-0.750121187542541
ENSG00000254802		iPSC	0.849445026662298	1.13980052418882	1.14343501453908	0.481471891727032	0.156060807672412	0.759690396824118	-0.693513258983819	-0.83708810007773	-1.04540632924912	-0.785161187027618	-0.399938930804052	-0.768795855471419
ENSG00000166831	RBPMS2	iPSC	0.823487579581868	0.855870428521241	1.1681438270698	0.299666389346132	0.834808378578061	0.116789657572465	-1.06002431942362	-1.06002431942362	-0.654354339092732	0.300909099386217	-0.565248062692192	-1.06002431942362
ENSG00000171044	XKR6	iPSC	1.32285392045741	0.524869460033077	0.719263192509162	0.490534125326015	0.380679791671336	0.788405100714212	-1.23793849296296	-0.366159048074996	-0.605987687978605	-0.684944903941931	-0.0183543683021514	-1.31322108945057
ENSG00000130816	DNMT1	iPSC	0.377833547499333	0.406290165031163	1.64892831400776	-0.341931089675114	1.18969419342935	0.119006497840866	-0.308047986257818	0.0572218913611566	-0.513820715740702	-0.673374023568436	-1.45404165146201	-0.507759142465558
ENSG00000136159	NUDT15	iPSC	0.887476380607633	0.455697938861843	1.04756984513108	0.800248259979847	0.877280624562902	0.591217839719653	-0.984570127852815	-0.660318034133157	-0.831561972965953	-0.431576538831781	-1.05873394487403	-0.69273027020522
RBBP8;MIR4741	NA	iPSC	0.641676405563777	1.38787519379271	0.0120805399165054	0.657306531876044	0.810052993881975	0.517268977763648	-1.05842941170036	-1.33080571331855	-0.873258932145714	0.0582505284737893	-0.562863574332443	-0.259153539771385
ENSG00000279566	ZNF43	iPSC	0.224665612553367	0.73613151184066	-0.168474006710767	1.0109394362556	0.452990639068472	0.766861429555445	-1.59561651490803	-0.0665360305762812	0.114965206800784	-0.234683096098193	0.354372327126971	-1.59561651490803
ENSG00000236253	SLC25A3P1	iPSC	0.600122140579671	0.698775855203325	-0.0776253414820749	1.1349621573115	0.65004163709995	1.37625553801619	-0.768472503308927	-0.540169470183925	-0.768472503308927	-0.768472503308927	-0.768472503308927	-0.768472503308927
SNHG14;SNORD116-6	NA	iPSC	0.871389384564489	1.52157846602683	1.11823881040858	-0.0273957540248073	-0.135124099666644	0.0449184870663863	-1.012122514441	0.233768436338139	-0.439663604349224	-1.012122514441	-1.012122514441	-0.151342583040757
FOXN3;RP11-33N16.3	NA	iPSC	0.474968784129841	0.807950170205725	0.952961831215762	0.116194681398561	0.332514992734227	0.470467318557448	-1.78723997922187	0.359781511413255	-0.0766582575130563	-0.66530631644819	0.307947765485121	-1.29358250195682
SGOL1	NA	iPSC	0.758742138703933	1.03188761418878	1.00632183586566	0.238544312424309	0.791289944962488	0.506886390879206	-1.17239028765263	-0.579018859749853	-0.0524618122951974	-0.592802041029879	-0.705505681014559	-1.23149355528226
ENSG00000189403	HMGB1	iPSC	0.743273399524215	1.05454444996203	1.08687660454551	0.547428477381347	0.689359403617244	0.477920616592748	-0.799495718390168	-0.553746111804084	-0.416483419748689	-0.923516815909158	-0.837193341338738	-1.06896754443227
ENSG00000125871	MGME1	iPSC	0.869225679799538	0.757501365473233	1.10097101324331	0.0900299113933318	-0.0198244222613466	0.20475884784351	-1.63844270689565	0.527718033258508	0.176985211624725	-0.302456400652131	-1.34486837871588	-0.421598154111158
ENSG00000111206	FOXM1	iPSC	0.82323004532484	0.918842665808304	1.27764032769817	-0.0123253217203652	1.19050627625039	-0.553212190933772	-0.997052082136556	-0.57168684947782	-0.424593172044782	-0.519759936427708	-0.134537680204142	-0.997052082136556
ENSG00000165152	TMEM246	iPSC	0.969616317424842	1.10115383415958	1.06297173293204	-0.253794776995671	1.08176267851227	0.122645242346519	-0.526940385112352	-0.313979129922338	-0.878787209378601	-0.513768355951364	-0.924377912853187	-0.926502035161731
ENSG00000116990	MYCL	iPSC	0.263614484345891	0.412924299116515	0.335810547431713	1.32240152694547	0.610814561720451	1.34133229388816	-0.347434930138508	-0.491009771232419	-0.699328000403807	-0.916375003891155	-0.916375003891155	-0.916375003891155
ENSG00000262102	DSEL	iPSC	0.592653918535781	0.910146741065041	0.699279668672903	0.599176846260002	0.306915427417666	0.630274813184432	-0.714420743858084	-1.58201387224489	-0.806488226166623	0.171862624501057	-1.14486470297122	0.337477505603935
ENSG00000178921	PFAS	iPSC	0.931656377349329	1.13511317898305	0.895913327757749	0.416822388660476	0.489526540489072	0.572094898995101	-1.06128835771438	-0.609646372039669	-0.908280202827517	-1.15293628575818	-0.474928256204605	-0.23404723769043
ENSG00000138032	PPM1B	iPSC	0.138126990700414	0.31746281474585	0.347859249962515	1.2667340119482	0.646536007919773	0.970412530468382	-0.2525421483303	-1.46278350047683	-0.579056550375803	-0.167644087558227	-1.35372376378956	0.128618444785589
QTRTD1	NA	iPSC	1.35453019553298	0.851348119389277	1.20159380836524	-0.578870667154127	0.649329870095251	-0.0686888509103452	-0.269603695020145	-0.224920768479073	-0.150277930540046	-0.768210682197581	-0.750726571175002	-1.24550282790643
ENSG00000164611	PTTG1	iPSC	0.432841232445292	0.854643853514354	0.233224864009645	0.55971940388315	0.751733699214891	0.999758098366026	-1.67905712695347	0.411006363704516	-0.957108898313964	-0.557123464179792	-0.523756951691052	-0.525881073999596
ENSG00000147246	HTR2C	iPSC	0.980917389262533	0.733050661916323	0.997249336812545	0.794184989119128	0.118136527405564	0.839299643532047	-1.18284408602854	-0.954541052903535	-0.610385175936763	-0.705551940319689	-0.320329684096123	-0.689186608763491
ENSG00000163682	RPL9	iPSC	1.43412285425337	1.05709614059255	0.804201597627029	0.289910151058685	-0.770514435525845	-0.491874494341582	0.498148687880225	-0.675935438626117	-0.552703657516627	-0.439328826866011	-1.27465188615614	0.12152930762046
ENSG00000160208	RRP1B	iPSC	1.17925407522733	0.954576910230022	1.24459096118788	0.107701114871433	0.62387265098934	0.170098058266936	-0.458983272819124	-0.626377347562427	-0.618974871957379	-0.811476338399721	-1.09673934568928	-0.667542594345006
ENSG00000198865	CCDC152	iPSC	1.1327738528593	0.884907125513089	0.881294368531346	-0.364355461679469	1.01761953154473	0.145826354564313	-1.03098762243177	-1.03098762243177	-0.173595857837174	-0.553695476722923	-1.03098762243177	0.122188430522105
ENSG00000139734	DIAPH3	iPSC	0.49794592548721	0.359415089888843	0.537180764814958	0.852016557052432	0.774594148449295	0.977894364037422	-0.832668482196324	0.0533462750994795	-0.0126146904059707	-1.24453563742285	-0.510281311525693	-1.45229300327881
ENSG00000145220	LYAR	iPSC	0.937840014475335	0.993801744819481	1.18073769415821	-0.366117569701675	0.249181084192622	-0.151311691800116	0.352756253123394	-1.57536862165443	-1.04712954998119	-0.177232030026488	0.134254816122158	-0.531412143727296
RP1-34H18.1	NA	iPSC	1.16744395014358	0.880538687583676	1.77675864173383	-0.586709670928577	-0.586709670928577	-0.347788397403408	-0.586709670928577	-0.586709670928577	0.135238557710931	-0.586709670928577	-0.0919334141971504	-0.586709670928577
ENSG00000197451	HNRNPAB	iPSC	0.598644560792851	0.379791738221272	0.520081784275311	1.24368851089571	0.514613212496384	1.10412014011069	-0.823782186938627	-1.20096487229489	-0.818477579404101	-0.677747657051231	-0.644381144562491	-0.195586506540871
CH507-254M2.2	NA	iPSC	0.627882973958606	1.50971268540319	0.596562644752814	0.647805735573549	0.0453516883872194	0.56057722436354	-0.279729792160597	-0.502174259801731	-0.274425184626072	-0.420305865756757	-1.25562892504688	-1.25562892504688
ENSG00000150672	DLG2	iPSC	0.710836839262908	0.811967611718718	0.296795839583927	0.24074998000731	-0.344323324202053	0.245183603412249	1.34015828569459	-0.122372433957327	-0.628392127304869	-0.753691476527184	0.000925127434846296	-1.79783792512311
ENSG00000165061	ZMAT4	iPSC	1.05695888575211	1.17833086245377	1.12921912925717	0.56341984162241	-0.727163790656451	0.175671781403673	-1.00114219559241	-0.575776962933675	-0.428683285500637	-0.523850049883563	0.154157979670009	-1.00114219559241
ENSG00000122966	CIT	iPSC	0.853436568154716	0.86914815090983	0.344939419481404	0.736725912991148	0.877233451250595	0.774412569669773	-0.741384833383707	-0.556870241891203	-0.21510000976997	-1.31032490713635	-0.815548650404927	-0.816667429871307
ENSG00000167325	RRM1	iPSC	0.561027028335015	1.14882889725799	0.563908893365645	0.394416136911399	1.0962776354869	0.413391390198873	-1.51060142688735	-0.534829886849612	-0.390672951529914	-0.526712876892995	-0.253167687834412	-0.96186515156155
GSG2	NA	iPSC	0.901067876837551	0.382319929423465	1.06386192727351	0.353731554653608	1.04148718679731	0.449696288752114	-1.21083048256121	-0.612114035031194	-0.353438717966617	-0.0888968197875331	-0.716054225829787	-1.21083048256121
CCDC169-SOHLH2;CCDC169	NA	iPSC	0.864305355694498	0.311038215275887	0.454288162142483	0.955855053928095	1.03288741851115	0.686834069148913	-0.104945046611668	-1.16960037453221	-0.30267851029083	-0.920611261948365	-0.903127150925787	-0.904245930392167
ABBA01017803.1	NA	iPSC	0.924605030763365	0.665339194036934	-0.22518607340566	0.47924206483521	-0.092495469087849	0.583836412795164	-0.858273846644843	-1.61049236125385	-1.23957076052677	0.447951548860011	0.360739899349821	0.564304360278464
ENSG00000184588	PDE4B	iPSC	0.862532996020636	1.17606523387442	0.260761120296896	0.278137273969361	-0.204555020026036	1.00318404200574	-1.08155343480039	0.265038128720216	-0.675883454469503	0.279379984009446	-1.08155343480039	-1.08155343480039
ENSG00000188976	NOC2L	iPSC	0.947954102353592	0.525511009930894	1.0388648973564	0.47790159306939	0.460941804824393	0.50899955999382	-1.55971428434159	-0.224343894414654	-0.491472742748068	-0.38330100594293	-0.0334666133872492	-1.267874426694
ENSG00000138074	SLC5A6	iPSC	1.08942602361715	1.11590480818108	0.773486535989811	-0.00872999877146441	-0.12440619422508	-0.092128451921635	-1.75265522323496	-0.859463055762658	-0.192809218350277	-0.18674549107072	-0.354081121723849	0.592201387272602
CTD-2006C1.2	NA	iPSC	1.2935060674903	1.19443869424743	0.711782690397945	0.048176581119348	-0.0978713156865956	0.299820693314948	0.256415117940888	-0.37875503974454	-0.794437227455965	-1.51638545609547	-0.361085280833053	-0.655605524695232
ENSG00000088325	TPX2	iPSC	1.04317693787099	0.769026693644585	1.12296313133598	0.443716116521697	0.398675408360416	0.313139065104353	-0.382593155570408	-0.0800410680525756	-0.373051575430455	-1.21035540580991	-0.759334136853488	-1.28532201112118
ASRGL1;RCC2P6	NA	iPSC	1.25529126140904	0.460330856569579	1.01852087712464	0.557644535272147	0.166098260645372	0.809288647467747	-1.00691750194267	-0.778614468817671	-0.789870498455326	-0.171594442652549	-1.00691750194267	-0.513260024677627
ENSG00000178966	RMI1	iPSC	0.936060309306733	1.45480226722653	0.304733961624114	0.709577665800877	-0.443314139068463	0.538541611411105	-0.947451589698754	-0.719148556573752	0.147773307667629	-0.947451589698754	-0.947451589698754	-0.086671658298513
ENSG00000071575	TRIB2	iPSC	1.12729029727226	0.902487018612027	0.873036496430637	0.388793574400717	0.0633824903460969	0.533036514586456	-1.35513165006278	-0.461939482590477	-0.949461669731893	-0.877839504353933	-0.492617248130367	0.24896316322126
ENSG00000173894	CBX2	iPSC	0.950216267797621	0.822255746755004	0.730066981446868	0.663159092476227	0.634378865986478	0.666656608289923	-0.993870163023404	-0.765567129898402	-0.588200182692517	-0.993870163023404	-0.13135576109099	-0.993870163023404
RP11-146I2.1	NA	iPSC	1.47877273266599	1.23090600531978	1.0389484018452	0.149439957688922	-0.411010337689117	-0.684988742625077	-0.684988742625077	-0.456685709500075	-0.467941739137729	-0.684988742625077	0.177525659307337	-0.684988742625077
CCBL2;RBMXL1	NA	iPSC	0.729599785179017	0.447479579640977	0.540826674135045	0.883372178451577	0.452817706616013	0.670141268312126	0.170857858547819	-0.258476550029638	-0.0817856973816333	-1.59500536418226	-0.607983469580987	-1.35184396970806
ENSG00000132359	RAP1GAP2	iPSC	1.03852701186019	-0.0134287836061273	0.563584497941474	0.637455186015296	0.875258628517345	1.06516340732179	-1.01957406948433	-0.420857621954316	-0.162182304889738	-1.01957406948433	-0.524797812752908	-1.01957406948433
ENSG00000204352	C9orf129	iPSC	1.12831246875609	0.835034321555733	0.709251266048442	0.690654735837454	0.653282264234238	0.516204271079856	-0.873907301377367	-0.873907301377367	-0.656860297890019	-0.873907301377367	-0.873907301377367	-0.380249824112321
ENSG00000168496	FEN1	iPSC	0.965938265847157	0.863614537235332	0.925792809425879	0.207683929286889	0.834958709719648	0.495967779100554	-0.482851035340165	-0.547912650954242	-0.197767847662018	-1.15727920407821	-0.952643714194525	-0.955501578386293
ENSG00000167272	POP5	iPSC	0.726728628580064	0.606282080150387	1.37154747867575	0.107462883845534	-0.073281346226413	0.0921963878743401	-1.7959717767749	0.294091713883092	0.234253952443583	-0.230062044610654	-0.933457374842482	-0.399790582998301
ENSG00000236759	EHMT2	iPSC	0.609297950159811	0.206341213694148	0.725567737254465	1.00808425405906	0.308727133746975	0.699722921223173	-1.50260040923895	-1.27429737611395	-0.780652180599444	0.0633093229252899	0.285923789174507	-0.349424356285077
ENSG00000144815	NXPE3	iPSC	0.91944414162538	1.57417948017746	0.675588763480054	-0.173546794727475	-1.02040214630263	0.281517155370055	-0.72544047748594	-0.695664103708568	-1.07733354775124	-0.172446888464906	0.312303775249796	0.101800642538008
ENSG00000154217	PITPNC1	iPSC	0.906864914296628	0.261441380807339	0.631353241657403	1.11191628440976	0.363827300860166	0.810207055653556	-0.878560168373115	-1.21919720900076	-0.590108477531165	-0.970208096416914	0.159184084362622	-0.586720310725521
ENSG00000090889	KIF4A	iPSC	0.51967907018496	0.796247890019269	0.724835321790876	-0.0554032252704419	0.886955301110511	0.721540672284148	-0.73166298352379	0.465095900916832	-0.578654828636928	-1.30060305727644	-1.30060305727644	-0.147427004322561
ENSG00000116062	MSH6	iPSC	0.86352145660751	0.967404366309291	0.903502786749701	0.50428602188447	0.811675387850242	0.455417527533143	-0.755630718753256	-0.459073561606502	-0.534214056393155	-0.89705567604094	-0.873909077862303	-0.9859244562782
ENSG00000033867	SLC4A7	iPSC	0.156836843756619	0.865441223966071	0.474380177723386	1.09135518713975	0.585407899791528	0.70624837704384	0.286875797062324	-0.952190758904532	-1.27292401628506	-1.01005986708671	-0.690082751114415	-0.241288113092795
ENSG00000146776	ATXN7L1	iPSC	0.473048877296158	1.07709791098503	0.389585509281773	0.769908847730199	0.446782542819139	0.854507851862015	-1.17183574181516	-0.603145399216876	-0.883384050973212	-1.26348366985896	-0.134091489079426	0.0450088109693274
RP11-867G2.6	NA	iPSC	0.31842907909386	0.710122658525593	-0.066278538159807	1.48165083084996	0.770063865624946	0.903401071326668	-0.75712569998666	-0.331760467327924	-0.75712569998666	-0.75712569998666	-0.75712569998666	-0.75712569998666
ENSG00000124802	EEF1E1	iPSC	0.686015969952318	1.12111986858595	0.840732319220635	0.381249878234324	0.455911691975805	-0.509004871383603	-0.243668274379463	-0.775823917955361	-0.404902317228283	-0.051052625231407	-1.79640597738272	0.2958282555918
ENSG00000256771	ZNF253	iPSC	1.10671584245535	0.106882724978951	0.761409414708258	0.636717632882473	0.771659332998627	0.214147251456271	-1.60205889795415	-1.00334245042413	-0.401168019217144	-0.0361491657899071	0.18646530045931	-0.741278966553909
ENSG00000165891	E2F7	iPSC	1.11722924524235	0.71953046215679	0.692893654814119	0.806839212998812	0.0764203149664278	0.38939775348824	-0.527655373868972	-0.671230214962882	-0.87954844413427	0.469314284542624	-1.09659544762162	-1.09659544762162
ENSG00000230124	ACBD6	iPSC	0.772488348360031	0.613700858830166	0.647832616519632	0.394518690503492	0.299421109607741	0.532198077588396	-2.11377268213532	-0.377181977709445	-0.169675020750553	0.255795225333971	-0.119743468103365	-0.735581778044739
ENSG00000114346	ECT2	iPSC	0.867482001989692	1.26300976674024	0.853040525232443	0.147717364815245	-0.0486727661614683	0.23231636894706	0.0568142224065973	-0.526298534889387	-0.0712318998188346	-0.0639329071823527	-1.50045289655035	-1.20979124552889
ENSG00000120837	NFYB	iPSC	1.07447052825345	1.19239386213817	0.939499319172647	0.604571059852981	0.161626448823584	-0.356576772795963	-0.163455031724233	-0.246161997138213	-0.28196240001592	-1.13935416461052	-1.13935416461052	-0.645696687345471
ENSG00000117395	EBNA1BP2	iPSC	1.02593157682658	0.688277008701569	1.46485240057154	-0.0437244238973351	0.322094080638446	0.312051702048196	-0.161112113702755	-1.28377830023461	-0.734981637711647	-0.165244460024859	-0.67469564048488	-0.749670192730239
FAM60A	NA	iPSC	0.799297701301089	0.785894296188047	1.10798659203856	0.545796592114918	0.594950716659857	0.632567700151195	-0.653699881841719	-0.436572007289342	-0.928746496537864	-0.704857005110307	-0.65357150485269	-1.08904670282174
ENSG00000006634	DBF4	iPSC	1.13859323050209	1.25060305412719	0.675756690997822	0.589885197925777	0.58988968073395	-0.00312407219106614	-0.628639244133502	-0.559082046586914	-0.850171596677655	-0.855971587576498	-0.810909125537662	-0.536830181583523
ENSG00000255717	SNHG1	iPSC	0.327000340546184	0.298808657670018	0.70267701382538	0.039943165224789	-0.198571949865964	-0.440272113278758	0.927481676440463	0.961183698558918	0.767281901998178	-1.13979394456599	-1.12230983354342	-1.1234286130098
ENSG00000135069	PSAT1	iPSC	0.911498997308652	1.21817421990834	1.12259683913224	0.253048849112728	-0.123196245896097	-0.26027423905048	-1.08144573775506	-1.22502057884897	-0.258882151353268	0.0949675406436077	0.138138386905757	-0.789605880107462
ENSG00000074657	ZNF532	iPSC	0.435239121654281	0.446239696767146	0.232301820399543	0.69361109080492	1.17175705684476	0.850649065124798	-1.11156215081439	-0.949830867349746	-1.10625754327987	-0.342107931549369	-0.688887182189566	0.368847823587502
ENSG00000108561	C1QBP	iPSC	0.965009657171257	1.20606188102937	1.06761360404088	0.132184695814697	0.397930905880473	0.232851967401936	-1.08138145455692	-0.8183949015666	-0.290850372781351	-0.141123427534337	-0.79072583831551	-0.879176716583899
ENSG00000137055	PLAA	iPSC	0.642682639800666	1.07675405833225	0.947783864969025	0.447511714933025	0.611797346636602	-0.0341631969630605	-0.739132791739123	0.156465318914414	0.0924974975306414	-1.1699368319687	-1.13657031947996	-0.895689300965783
ENSG00000163923	RPL39L	iPSC	0.931491185911437	0.864913332042363	0.761333451787092	0.436599965914105	0.963956131462037	0.349371454704095	-0.173876333660781	-0.713380029461176	-0.485630954285516	-0.989542548997478	-0.972058437974899	-0.973177217441279
ENSG00000155438	NIFK	iPSC	0.622771783828677	1.12334664750838	1.09221857254902	0.32487910441339	0.799809298369575	0.209584617391637	-0.125996116320123	-0.771120477647442	-0.699752583933995	-0.571861798110456	-1.09069285208087	-0.913186195967781
ENSG00000046653	GPM6B	iPSC	0.861451922780736	0.987148164242553	1.00337840284256	0.634969279274879	0.278920637209349	0.463933224885107	-1.02205997622475	-1.02205997622475	-0.449601066132978	-0.186736916934627	-0.527283719493325	-1.02205997622475
ENSG00000164176	EDIL3	iPSC	-0.124385683795538	0.265129440108304	0.475193369686569	0.793942820710854	1.19071970294766	0.854712818278195	-1.06035985016868	-1.06746146601177	-1.12257870249623	0.245865545336176	-0.606060189369434	0.155282194773879
ENSG00000077097	TOP2B	iPSC	0.664314034692761	0.693991824360804	0.859863541226537	0.611150382211754	0.387396545087021	0.91349920748568	-1.31908409245516	-1.03515303186504	-0.533026758225997	-0.00906249521690139	-0.921832953423417	-0.312056203878035
ENSG00000198093	ZNF649	iPSC	0.390206649912512	0.286279268868319	0.075412196476182	0.949394709804281	1.10634468884882	0.952116843169756	-0.21146505621099	-0.138286473770505	-0.202701249748191	-0.88589322494904	-1.47594640183793	-0.845461950563214
ENSG00000263310	SALL3	iPSC	0.480974057989818	0.735524986964247	0.533841862846844	0.683612619530777	1.14633833598724	0.842789513441567	-0.973416635968854	-0.745113602843852	-0.756369632481506	-0.496124490260006	-0.478640379237427	-0.973416635968854
ENSG00000131725	WDR44	iPSC	0.353616683614418	0.214575315179331	0.404647400836531	0.95725000746099	1.25313540011525	0.577647148866341	0.314090012435019	-1.11004677663013	-0.840184573561931	-0.645839915274581	-1.15219219375963	-0.326698509281605
ENSG00000163530	DPPA2	iPSC	1.05901480599206	1.29440143321722	0.904417477606776	-0.0506429245149622	0.533442515579917	0.291742352167123	-0.885071624828961	-0.656768591703959	-0.312612714737187	-0.407779479120113	-0.885071624828961	-0.885071624828961
ENSG00000144724	PTPRG	iPSC	0.70997384893094	0.656163539651949	0.992901133581503	0.672481760104182	0.369729198508518	0.847223790120557	-0.501661760157734	-0.947203086778481	-0.661340263708098	-1.34395406517823	-0.184109060688376	-0.610205034386725
ENSG00000101773	RBBP8	iPSC	0.753746316958162	0.815859698603117	0.397820435251836	0.621685892395097	0.581369600593433	0.797079576755543	-0.946359500305972	-1.10168744500058	-0.458890314171177	-0.190723783187768	0.108637452059592	-1.37853792995128
RP11-259O18.5	NA	iPSC	1.26512919707793	0.800178527718086	1.0592196855331	0.566718824503159	0.0840265305077623	0.383842092729492	-0.792971884266592	-0.194255436736573	-0.792971884266592	-0.792971884266592	-0.792971884266592	-0.792971884266592
ENSG00000182175	RGMA	iPSC	1.25735212033315	0.848282762184373	0.762390849015393	0.0895610505136935	0.287718395761733	0.995597687868487	-0.744867649800305	-0.516564616675303	-0.744867649800305	-0.744867649800305	-0.744867649800305	-0.744867649800305
ENSG00000120685	PROSER1	iPSC	0.838320341552743	1.32635706898033	1.02227870977432	0.362670756325285	0.0383103667462668	0.131826085608205	-0.708480930915932	-1.25901483114348	-0.703176323381407	0.0609732883490941	-0.821865661869802	-0.288198870025621
ENSG00000132932	ATP8A2	iPSC	1.15843621729474	1.14338880519169	0.836026960331717	0.167371614407092	-0.0764637273296658	0.787003195564772	-0.384522068351373	-0.528096909445284	-0.736415138616672	-0.95346214210402	-0.95346214210402	-0.459804664838974
ENSG00000163002	NUP35	iPSC	0.70943503227421	0.982391415994219	1.18475332503284	0.485408296218786	0.163985349859592	0.444110312634484	-0.137677458365	-0.740513085410562	-0.582195255548427	-0.582869748560681	-0.435690006727651	-1.49113817740181
ENSG00000133083	DCLK1	iPSC	0.377191233670152	0.851029730512565	0.424980157471069	0.498850845544891	1.27261241621362	0.798532180149257	-0.589238336202093	-0.929875376829738	-0.585719499862966	-1.15817840995474	-0.295664008022326	-0.664520932689693
ENSG00000137642	SORL1	iPSC	1.07346518250065	0.439524156569646	0.607188497384111	0.709432410456161	0.608920930901498	0.521681504201434	-1.4610097254666	0.117071691415883	-0.829058920482236	-0.669016380409406	-0.241425600805782	-0.876773746265366
ENSG00000163029	SMC6	iPSC	0.599403603866916	0.849710911192993	0.77007172337808	0.299732431326554	0.575287980440614	0.163239572479416	-1.03089031814319	-0.152125606523213	-0.185784675235557	0.385461281444326	-1.83928616027245	-0.434820743954485
ENSG00000163961	RNF168	iPSC	1.0544066463258	1.00936909685069	1.13047334581993	-0.0949103314844999	-0.0797731689766259	-0.104415698533161	0.483484770889419	-0.0772177214661403	-0.363340117576653	-1.12354769971221	-1.22215293584096	-0.612376186295581
ENSG00000092201	SUPT16H	iPSC	0.829206679950762	1.0647986045597	1.35676878301393	-0.616656016937034	0.822962908989914	-0.672188944112001	-0.659863957257172	-0.0877951559326577	-0.0855324463607108	-0.524871546660994	-0.608249671184161	-0.81857923806957
ENSG00000042781	USH2A	iPSC	0.609269195063914	1.02127236803156	1.15258956722927	0.488983457950677	0.451610986347461	0.500319127344497	-1.07557857926414	-1.07557857926414	-0.669908598933257	-0.24025551997402	-0.580802322532718	-0.581921101999098
ENSG00000203326	ZNF525	iPSC	1.34023440035144	1.03185413396715	0.678246576340409	0.475182228646993	0.309480696485255	-0.111735274043449	-0.208888485455127	-0.364216430149739	-0.110343186346238	-1.02455470079182	-1.00707058976925	-1.00818936923563
ENSG00000089048	ESF1	iPSC	0.674683057488642	0.551881272021594	0.670698554636403	0.594167269289171	0.150033573354983	0.965441983339263	-0.549546393000286	-1.50356764847352	-1.24489233140894	0.19675029529687	-0.495599769515157	-0.0100498630290229
ENSG00000143858	SYT2	iPSC	0.98318663495913	1.40850607193315	1.19900232860561	-0.104334825360729	-0.0683868052009755	-0.147727676389668	-0.770966986113031	-0.770966986113031	-0.770966986113031	-0.770966986113031	-0.276190729381604	0.0898129452872101
ENSG00000146918	NCAPG2	iPSC	0.643748907581828	1.40771123819504	1.08766262530849	-0.0526524515610083	0.0900734452474241	0.28136196039855	-0.476943823705418	-0.417341018455929	0.056776011633076	-0.284328174557363	-1.16716712477626	-1.16890159530843
ENSG00000237649	KIFC1	iPSC	0.629984192712937	1.09238283081226	0.942617183397434	0.569939041713665	1.01813261790027	-0.21572349122764	-0.920693086003703	-0.27161486802121	-0.562704418111951	-0.728077436855648	-0.684906590593498	-0.869335975722918
ENSG00000267742	FAM60CP	iPSC	0.468459950643885	0.658336364683242	0.618230514368251	1.16811708131865	0.913778436719472	0.581199578628212	-0.808911993829011	-0.580608960704009	-0.591864990341663	-0.808911993829011	-0.808911993829011	-0.808911993829011
ENSG00000111846	GCNT2	iPSC	0.726926504226929	0.541037368475704	0.766161343554677	0.182928049042554	0.486285696148783	0.527312982442631	-0.41279246010129	0.431065842212663	0.291997228486107	-1.25455481471929	-1.51397407556055	-0.772393664208925
ENSG00000164338	UTP15	iPSC	0.830010136475167	0.99046141233387	0.96808409281665	0.0855494937598031	-0.44642649789298	-0.191611437455903	0.484683473936658	-1.05364731079628	0.492700429151971	-0.357078880681338	-0.323712368192598	-1.47901254345502
STMN1;MIR3917	NA	iPSC	0.631016849373	0.982618049417858	0.495005437777563	0.821802379909232	0.733521214933022	0.685842384077128	-0.658131554613877	-1.00119167097881	-0.200404523275232	-0.799474526302392	-0.744835377899989	-0.945768662417503
ENSG00000164134	NAA15	iPSC	1.01978994918131	0.991616059602168	0.778373070729872	0.208500332542952	-0.0423893519640099	0.49786080420269	0.485919176070966	-0.814987467419133	-1.19799440008743	-0.159230272813728	-0.942607137858812	-0.824850762186852
[truncated: 415 more rows]
