# Supplementary material for: Analysis of the transcription factors and their regulatory roles during a step-by-step differentiation of induced pluripotent stem cells into hepatocyte-like cells
Source: Royal Society of Chemistry journal article supplement (doi:10.1039/c9mo00122k), 2019-10-15
Supplement: c9mo00122k5.xlsx [file c9mo00122k5.xlsx]

## Sheet: WRNIP1
Top targets:
Search:
Show 102550100 entries
Promoter	Score	Transcript	Gene	Gene Info
chr3_+_186330712	5.65	ENST00000411641.2	AHSG	alpha-2-HS-glycoprotein
		ENST00000273784.5
chr11_-_2158507	5.55	ENST00000381392.1	IGF2	insulin-like growth factor 2 (somatomedin A)
		ENST00000381395.1
		ENST00000418738.2
chr12_+_54519842	5.07	ENST00000508564.1	RP11-834C11.4	RP11-834C11.4
chr11_-_2160180	4.79	ENST00000381406.4	IGF2	insulin-like growth factor 2 (somatomedin A)
chr4_-_109090106	4.53	ENST00000379951.2	LEF1	lymphoid enhancer-binding factor 1
chr11_+_74862032	3.63	ENST00000289575.5	SLCO2B1	solute carrier organic anion transporter family, member 2B1
		ENST00000341411.4
chr8_-_141467818	3.54	ENST00000389327.3	TRAPPC9	trafficking protein particle complex 9
		ENST00000438773.2
chr3_-_46904946	3.49	ENST00000292327.4	MYL3	myosin, light chain 3, alkali; ventricular, skeletal, slow
chr8_-_23261589	3.48	ENST00000524168.1	LOXL2	lysyl oxidase-like 2
		ENST00000523833.2
		ENST00000519243.1
		ENST00000389131.3
chr5_-_43313269	3.45	ENST00000511774.1	HMGCS1	3-hydroxy-3-methylglutaryl-CoA synthase 1 (soluble)
Showing 1 to 10 of 200 entries
Previous
1
2
3
4
5
…
20
Next
Gene Ontology Analysis
Gene overrepresentation in molecular_function category:
Search:
Show 102550100 entries
Log-likelihood per target	Total log-likelihood	Term	Description
0.4	37.1	GO:0004867	serine-type endopeptidase inhibitor activity(GO:0004867)
0.3	36.9	GO:0004252	serine-type endopeptidase activity(GO:0004252)
0.5	21.1	GO:0005179	hormone activity(GO:0005179)
0.0	20.9	GO:0050839	cell adhesion molecule binding(GO:0050839)
0.3	20.8	GO:0050840	extracellular matrix binding(GO:0050840)
0.3	16.7	GO:0005201	extracellular matrix structural constituent(GO:0005201)
0.1	13.7	GO:0051015	actin filament binding(GO:0051015)
1.1	12.4	GO:0045159	myosin II binding(GO:0045159)
0.1	12.4	GO:0005178	integrin binding(GO:0005178)
0.6	11.0	GO:0015643	toxic substance binding(GO:0015643)
Showing 1 to 10 of 678 entries
Previous
1
2
3
4
5
…
68
Next
Gene overrepresentation in C2:CP category:
Search:
Show 102550100 entries
Log-likelihood per target	Total log-likelihood	Term	Description
0.3	71.1	NABA ECM REGULATORS	Genes encoding enzymes and their regulators involved in the remodeling of the extracellular matrix
0.3	53.9	NABA ECM GLYCOPROTEINS	Genes encoding structural ECM glycoproteins
0.6	33.1	NABA COLLAGENS	Genes encoding collagen proteins
0.2	29.8	NABA ECM AFFILIATED	Genes encoding proteins affiliated structurally or functionally to extracellular matrix proteins
0.4	26.6	PID INTEGRIN1 PATHWAY	Beta1 integrin cell surface interactions
0.3	19.9	PID HNF3B PATHWAY	FOXA2 and FOXA3 transcription factor networks
0.2	12.7	PID AJDISS 2PATHWAY	Posttranslational regulation of adherens junction stability and dissassembly
0.4	12.5	ST WNT CA2 CYCLIC GMP PATHWAY	Wnt/Ca2+/cyclic GMP signaling.
0.5	11.2	PID INTEGRIN4 PATHWAY	Alpha6 beta4 integrin-ligand interactions
0.3	10.9	PID HEDGEHOG 2PATHWAY	Signaling events mediated by the Hedgehog family
Showing 1 to 10 of 125 entries
Previous
1
2
3
4
5
…
13
Next
Gene overrepresentation in cellular_component category:
Search:
Show 102550100 entries
Log-likelihood per target	Total log-likelihood	Term	Description
0.4	47.1	GO:0031093	platelet alpha granule lumen(GO:0031093)
0.1	47.0	GO:0005615	extracellular space(GO:0005615)
0.0	31.6	GO:0016021	integral component of membrane(GO:0016021)
0.3	29.2	GO:0005604	basement membrane(GO:0005604)
0.1	22.0	GO:0005788	endoplasmic reticulum lumen(GO:0005788)
0.0	21.6	GO:0005789	endoplasmic reticulum membrane(GO:0005789)
0.1	21.2	GO:0005578	proteinaceous extracellular matrix(GO:0005578)
0.2	15.7	GO:0043202	lysosomal lumen(GO:0043202)
1.2	15.1	GO:0098647	collagen type VI trimer(GO:0005589) collagen beaded filament(GO:0098647)
0.3	15.1	GO:0005581	collagen trimer(GO:0005581)
Showing 1 to 10 of 379 entries
Previous
1
2
3
4
5
…
38
Next
Gene overrepresentation in C2:CP:REACTOME category:
Search:
Show 102550100 entries
Log-likelihood per target	Total log-likelihood	Term	Description
0.5	34.0	REACTOME COLLAGEN FORMATION	Genes involved in Collagen formation
0.9	18.9	REACTOME REGULATION OF INSULIN LIKE GROWTH FACTOR IGF ACTIVITY BY INSULIN LIKE GROWTH FACTOR BINDING PROTEINS IGFBPS	Genes involved in Regulation of Insulin-like Growth Factor (IGF) Activity by Insulin-like Growth Factor Binding Proteins (IGFBPs)
0.2	18.7	REACTOME INTEGRIN CELL SURFACE INTERACTIONS	Genes involved in Integrin cell surface interactions
1.2	18.6	REACTOME HDL MEDIATED LIPID TRANSPORT	Genes involved in HDL-mediated lipid transport
0.4	12.8	REACTOME CASPASE MEDIATED CLEAVAGE OF CYTOSKELETAL PROTEINS	Genes involved in Caspase-mediated cleavage of cytoskeletal proteins
0.9	12.4	REACTOME COMMON PATHWAY	Genes involved in Common Pathway
0.1	11.3	REACTOME ACTIVATION OF CHAPERONE GENES BY XBP1S	Genes involved in Activation of Chaperone Genes by XBP1(S)
0.3	10.0	REACTOME TIGHT JUNCTION INTERACTIONS	Genes involved in Tight junction interactions
0.1	10.0	REACTOME PPARA ACTIVATES GENE EXPRESSION	Genes involved in PPARA Activates Gene Expression
0.2	9.7	REACTOME ADHERENS JUNCTIONS INTERACTIONS	Genes involved in Adherens junctions interactions
Showing 1 to 10 of 182 entries
Previous
1
2
3
4
5
…
19
Next
Gene overrepresentation in biological_process category:
Search:
Show 102550100 entries
Log-likelihood per target	Total log-likelihood	Term	Description
0.5	32.5	GO:0030574	collagen catabolic process(GO:0030574)
1.5	13.3	GO:2000467	positive regulation of glycogen (starch) synthase activity(GO:2000467)
0.6	11.1	GO:0043252	sodium-independent organic anion transport(GO:0043252)
1.0	9.3	GO:0048251	elastic fiber assembly(GO:0048251)
0.8	9.3	GO:0034369	macromolecular complex remodeling(GO:0034367) protein-lipid complex remodeling(GO:0034368) plasma lipoprotein particle remodeling(GO:0034369)
0.3	9.0	GO:0043171	peptide catabolic process(GO:0043171)
1.1	8.8	GO:0070236	negative regulation of activation-induced cell death of T cells(GO:0070236)
1.2	8.7	GO:0061031	endodermal digestive tract morphogenesis(GO:0061031)
0.8	8.7	GO:1902746	regulation of lens fiber cell differentiation(GO:1902746)
1.7	8.3	GO:0044856	plasma membrane raft distribution(GO:0044855) plasma membrane raft localization(GO:0044856) plasma membrane raft polarization(GO:0044858) regulation of plasma membrane raft polarization(GO:1903906)
Showing 1 to 10 of 1,292 entries
Previous
1
2
3
4
5
…
130
Next

## Sheet: NFIX
Top targets:
Search:
Show 102550100 entries
Promoter	Score	Transcript	Gene	Gene Info
chr18_+_29171689	5.73	ENST00000237014.3	TTR	transthyretin
chr11_-_116694009	4.18	ENST00000357780.3	APOA4	apolipoprotein A-IV
chr10_-_95360983	3.29	ENST00000371464.3	RBP4	retinol binding protein 4, plasma
chr6_+_150690133	2.90	ENST00000392255.3	IYD	iodotyrosine deiodinase
		ENST00000500320.3
chr22_+_38864041	2.51	ENST00000216014.4	KDELR3	KDEL (Lys-Asp-Glu-Leu) endoplasmic reticulum protein retention receptor 3
		ENST00000409006.3
chr9_+_124062071	2.33	ENST00000373818.4	GSN	gelsolin
chr11_-_116708302	2.29	ENST00000375320.1	APOA1	apolipoprotein A-I
		ENST00000359492.2
		ENST00000375329.2
		ENST00000375323.1
chr1_-_230850043	2.14	ENST00000366667.4	AGT	angiotensinogen (serpin peptidase inhibitor, clade A, member 8)
chr5_-_134914673	2.13	ENST00000512158.1	CXCL14	chemokine (C-X-C motif) ligand 14
chr11_-_2170786	2.07	ENST00000300632.5	IGF2	insulin-like growth factor 2 (somatomedin A)
Showing 1 to 10 of 200 entries
Previous
1
2
3
4
5
…
20
Next
Gene Ontology Analysis
Gene overrepresentation in molecular_function category:
Search:
Show 102550100 entries
Log-likelihood per target	Total log-likelihood	Term	Description
0.1	8.6	GO:0004867	serine-type endopeptidase inhibitor activity(GO:0004867)
0.1	7.7	GO:0005518	collagen binding(GO:0005518)
1.6	6.5	GO:0060228	phosphatidylcholine-sterol O-acyltransferase activator activity(GO:0060228)
2.1	6.2	GO:0004447	iodide peroxidase activity(GO:0004447)
0.8	5.9	GO:0004499	N,N-dimethylaniline monooxygenase activity(GO:0004499)
0.4	5.8	GO:0070324	thyroid hormone binding(GO:0070324)
0.0	4.9	GO:0051015	actin filament binding(GO:0051015)
0.0	4.2	GO:0003705	transcription factor activity, RNA polymerase II distal enhancer sequence-specific binding(GO:0003705)
0.1	4.1	GO:0005179	hormone activity(GO:0005179)
0.1	3.8	GO:0070888	E-box binding(GO:0070888)
Showing 1 to 10 of 509 entries
Previous
1
2
3
4
5
…
51
Next
Gene overrepresentation in cellular_component category:
Search:
Show 102550100 entries
Log-likelihood per target	Total log-likelihood	Term	Description
0.0	27.8	GO:0005615	extracellular space(GO:0005615)
0.1	13.1	GO:0031093	platelet alpha granule lumen(GO:0031093)
0.0	9.3	GO:0005788	endoplasmic reticulum lumen(GO:0005788)
0.0	8.2	GO:0016323	basolateral plasma membrane(GO:0016323)
0.1	8.1	GO:0035578	azurophil granule lumen(GO:0035578)
0.1	7.9	GO:0005604	basement membrane(GO:0005604)
0.0	6.4	GO:0005578	proteinaceous extracellular matrix(GO:0005578)
0.1	6.2	GO:0002102	podosome(GO:0002102)
0.1	5.8	GO:0005903	brush border(GO:0005903)
0.1	4.8	GO:0035579	specific granule membrane(GO:0035579)
Showing 1 to 10 of 273 entries
Previous
1
2
3
4
5
…
28
Next
Gene overrepresentation in biological_process category:
Search:
Show 102550100 entries
Log-likelihood per target	Total log-likelihood	Term	Description
2.2	6.6	GO:1904478	regulation of intestinal absorption(GO:1904478)
0.7	6.3	GO:0070327	thyroid hormone transport(GO:0070327)
0.8	5.8	GO:0006570	tyrosine metabolic process(GO:0006570)
0.1	5.3	GO:0006953	acute-phase response(GO:0006953)
0.7	3.6	GO:0061107	seminal vesicle development(GO:0061107)
0.2	3.5	GO:0071803	positive regulation of podosome assembly(GO:0071803)
1.1	3.3	GO:0048807	female genitalia morphogenesis(GO:0048807)
0.6	3.2	GO:0070995	NADPH oxidation(GO:0070995)
0.5	3.2	GO:0071895	odontoblast differentiation(GO:0071895)
0.1	3.2	GO:0045540	regulation of cholesterol biosynthetic process(GO:0045540)
Showing 1 to 10 of 841 entries
Previous
1
2
3
4
5
…
85
Next
Gene overrepresentation in C2:CP category:
Search:
Show 102550100 entries
Log-likelihood per target	Total log-likelihood	Term	Description
0.2	34.8	NABA ECM REGULATORS	Genes encoding enzymes and their regulators involved in the remodeling of the extracellular matrix
0.2	15.1	PID HNF3B PATHWAY	FOXA2 and FOXA3 transcription factor networks
0.1	11.6	NABA ECM GLYCOPROTEINS	Genes encoding structural ECM glycoproteins
0.1	7.8	PID DELTA NP63 PATHWAY	Validated transcriptional targets of deltaNp63 isoforms
0.1	6.9	NABA ECM AFFILIATED	Genes encoding proteins affiliated structurally or functionally to extracellular matrix proteins
0.1	4.5	NABA COLLAGENS	Genes encoding collagen proteins
0.1	4.1	PID HIF2PATHWAY	HIF-2-alpha transcription factor network
0.1	3.6	PID INTEGRIN4 PATHWAY	Alpha6 beta4 integrin-ligand interactions
0.1	3.6	PID INTEGRIN2 PATHWAY	Beta2 integrin cell surface interactions
0.1	3.5	PID NCADHERIN PATHWAY	N-cadherin signaling events
Showing 1 to 10 of 87 entries
Previous
1
2
3
4
5
…
9
Next
Gene overrepresentation in C2:CP:REACTOME category:
Search:
Show 102550100 entries
Log-likelihood per target	Total log-likelihood	Term	Description
1.0	7.8	REACTOME AMINE DERIVED HORMONES	Genes involved in Amine-derived hormones
0.5	7.6	REACTOME HDL MEDIATED LIPID TRANSPORT	Genes involved in HDL-mediated lipid transport
0.1	7.0	REACTOME AMYLOIDS	Genes involved in Amyloids
0.1	6.2	REACTOME CELL JUNCTION ORGANIZATION	Genes involved in Cell junction organization
0.1	6.0	REACTOME INTEGRIN CELL SURFACE INTERACTIONS	Genes involved in Integrin cell surface interactions
0.1	5.9	REACTOME ACTIVATION OF CHAPERONE GENES BY XBP1S	Genes involved in Activation of Chaperone Genes by XBP1(S)
0.3	5.8	REACTOME REGULATION OF INSULIN LIKE GROWTH FACTOR IGF ACTIVITY BY INSULIN LIKE GROWTH FACTOR BINDING PROTEINS IGFBPS	Genes involved in Regulation of Insulin-like Growth Factor (IGF) Activity by Insulin-like Growth Factor Binding Proteins (IGFBPs)
0.1	4.8	REACTOME PHASE1 FUNCTIONALIZATION OF COMPOUNDS	Genes involved in Phase 1 - Functionalization of compounds
0.1	4.1	REACTOME IRON UPTAKE AND TRANSPORT	Genes involved in Iron uptake and transport
0.1	4.1	REACTOME PEPTIDE LIGAND BINDING RECEPTORS	Genes involved in Peptide ligand-binding receptors
Showing 1 to 10 of 129 entries
Previous
1
2
3
4
5
…
13
Next

## Sheet: MEIS2
Top targets:
Search:
Show 102550100 entries
Promoter	Score	Transcript	Gene	Gene Info
chr9_-_113342160	3.10	ENST00000401783.2	SVEP1	sushi, von Willebrand factor type A, EGF and pentraxin domain containing 1
		ENST00000374461.1
chr9_-_22009297	2.62	ENST00000276925.6	CDKN2B	cyclin-dependent kinase inhibitor 2B (p15, inhibits CDK4)
chr6_-_166796461	2.50	ENST00000360961.6	MPC1	mitochondrial pyruvate carrier 1
		ENST00000341756.6
chr4_+_39408470	2.47	ENST00000257408.4	KLB	klotho beta
chr2_+_219283815	2.32	ENST00000248444.5	VIL1	villin 1
		ENST00000454069.1
		ENST00000392114.2
chr1_-_57431679	2.24	ENST00000371237.4	C8B	complement component 8, beta polypeptide
		ENST00000535057.1
		ENST00000543257.1
chr13_-_46785977	2.20	ENST00000442275.1	LCP1	lymphocyte cytosolic protein 1 (L-plastin)
chr9_-_113341985	2.06	ENST00000374469.1	SVEP1	sushi, von Willebrand factor type A, EGF and pentraxin domain containing 1
chr9_-_33447584	2.02	ENST00000297991.4	AQP3	aquaporin 3 (Gill blood group)
chr5_-_156486120	1.88	ENST00000522693.1	HAVCR1	hepatitis A virus cellular receptor 1
Showing 1 to 10 of 200 entries
Previous
1
2
3
4
5
…
20
Next
Gene Ontology Analysis
Gene overrepresentation in C2:CP category:
Search:
Show 102550100 entries
Log-likelihood per target	Total log-likelihood	Term	Description
0.1	20.9	NABA ECM GLYCOPROTEINS	Genes encoding structural ECM glycoproteins
0.0	8.2	NABA ECM REGULATORS	Genes encoding enzymes and their regulators involved in the remodeling of the extracellular matrix
0.1	7.9	PID HNF3A PATHWAY	FOXA1 transcription factor network
0.2	6.6	PID INTEGRIN2 PATHWAY	Beta2 integrin cell surface interactions
0.1	4.9	PID INTEGRIN1 PATHWAY	Beta1 integrin cell surface interactions
0.1	4.5	ST WNT CA2 CYCLIC GMP PATHWAY	Wnt/Ca2+/cyclic GMP signaling.
0.1	4.5	NABA PROTEOGLYCANS	Genes encoding proteoglycans
0.0	4.4	NABA ECM AFFILIATED	Genes encoding proteins affiliated structurally or functionally to extracellular matrix proteins
0.1	3.8	PID HEDGEHOG 2PATHWAY	Signaling events mediated by the Hedgehog family
0.1	3.7	PID HNF3B PATHWAY	FOXA2 and FOXA3 transcription factor networks
Showing 1 to 10 of 84 entries
Previous
1
2
3
4
5
…
9
Next
Gene overrepresentation in molecular_function category:
Search:
Show 102550100 entries
Log-likelihood per target	Total log-likelihood	Term	Description
0.1	10.6	GO:0004867	serine-type endopeptidase inhibitor activity(GO:0004867)
0.0	6.5	GO:0003705	transcription factor activity, RNA polymerase II distal enhancer sequence-specific binding(GO:0003705)
0.3	6.1	GO:0005104	fibroblast growth factor receptor binding(GO:0005104)
0.5	5.3	GO:0004861	cyclin-dependent protein serine/threonine kinase inhibitor activity(GO:0004861)
0.0	5.0	GO:0051087	chaperone binding(GO:0051087)
0.1	4.0	GO:0015020	glucuronosyltransferase activity(GO:0015020)
0.1	3.7	GO:0005201	extracellular matrix structural constituent(GO:0005201)
0.1	3.6	GO:0001105	RNA polymerase II transcription coactivator activity(GO:0001105)
0.3	3.5	GO:0031432	titin binding(GO:0031432)
0.0	3.5	GO:0004252	serine-type endopeptidase activity(GO:0004252)
Showing 1 to 10 of 450 entries
Previous
1
2
3
4
5
…
45
Next
Gene overrepresentation in cellular_component category:
Search:
Show 102550100 entries
Log-likelihood per target	Total log-likelihood	Term	Description
0.0	11.2	GO:0005578	proteinaceous extracellular matrix(GO:0005578)
0.1	8.0	GO:0005902	microvillus(GO:0005902)
0.0	7.3	GO:0005615	extracellular space(GO:0005615)
0.1	6.5	GO:0043202	lysosomal lumen(GO:0043202)
0.5	5.9	GO:0005577	fibrinogen complex(GO:0005577)
0.1	5.9	GO:0033116	endoplasmic reticulum-Golgi intermediate compartment membrane(GO:0033116)
0.1	5.6	GO:0035579	specific granule membrane(GO:0035579)
0.0	5.0	GO:0016323	basolateral plasma membrane(GO:0016323)
0.0	4.8	GO:0072562	blood microparticle(GO:0072562)
0.0	4.1	GO:0030864	cortical actin cytoskeleton(GO:0030864)
Showing 1 to 10 of 253 entries
Previous
1
2
3
4
5
…
26
Next
Gene overrepresentation in C2:CP:REACTOME category:
Search:
Show 102550100 entries
Log-likelihood per target	Total log-likelihood	Term	Description
0.4	5.6	REACTOME COMMON PATHWAY	Genes involved in Common Pathway
0.2	4.3	REACTOME COMPLEMENT CASCADE	Genes involved in Complement cascade
0.1	3.9	REACTOME GLYCOSPHINGOLIPID METABOLISM	Genes involved in Glycosphingolipid metabolism
0.1	3.8	REACTOME IRON UPTAKE AND TRANSPORT	Genes involved in Iron uptake and transport
0.2	3.5	REACTOME REGULATION OF INSULIN LIKE GROWTH FACTOR IGF ACTIVITY BY INSULIN LIKE GROWTH FACTOR BINDING PROTEINS IGFBPS	Genes involved in Regulation of Insulin-like Growth Factor (IGF) Activity by Insulin-like Growth Factor Binding Proteins (IGFBPs)
0.1	3.3	REACTOME A TETRASACCHARIDE LINKER SEQUENCE IS REQUIRED FOR GAG SYNTHESIS	Genes involved in A tetrasaccharide linker sequence is required for GAG synthesis
0.1	3.3	REACTOME G1 PHASE	Genes involved in G1 Phase
0.2	2.9	REACTOME GLUCURONIDATION	Genes involved in Glucuronidation
0.1	2.8	REACTOME PHASE II CONJUGATION	Genes involved in Phase II conjugation
0.1	2.5	REACTOME FORMATION OF FIBRIN CLOT CLOTTING CASCADE	Genes involved in Formation of Fibrin Clot (Clotting Cascade)
Showing 1 to 10 of 129 entries
Previous
1
2
3
4
5
…
13
Next
Gene overrepresentation in biological_process category:
Search:
Show 102550100 entries
Log-likelihood per target	Total log-likelihood	Term	Description
0.1	5.1	GO:0006953	acute-phase response(GO:0006953)
0.8	3.8	GO:0043152	induction of bacterial agglutination(GO:0043152)
0.2	3.6	GO:0071803	positive regulation of podosome assembly(GO:0071803)
0.2	3.5	GO:1901725	regulation of histone deacetylase activity(GO:1901725)
0.1	3.4	GO:0030511	positive regulation of transforming growth factor beta receptor signaling pathway(GO:0030511) positive regulation of cellular response to transforming growth factor beta stimulus(GO:1903846)
0.1	3.3	GO:0051895	negative regulation of focal adhesion assembly(GO:0051895)
0.2	3.1	GO:0043568	positive regulation of insulin-like growth factor receptor signaling pathway(GO:0043568)
0.3	3.0	GO:1902746	regulation of lens fiber cell differentiation(GO:1902746)
0.7	2.9	GO:0006850	mitochondrial pyruvate transport(GO:0006850) mitochondrial pyruvate transmembrane transport(GO:1902361)
0.4	2.9	GO:0052695	cellular glucuronidation(GO:0052695)
Showing 1 to 10 of 767 entries
Previous
1
2
3
4
5
…
77
Next

## Sheet: HNF1A
Top targets:
Search:
Show 102550100 entries
Promoter	Score	Transcript	Gene	Gene Info
chr4_+_74301880	8.26	ENST00000395792.2	AFP	alpha-fetoprotein
		ENST00000226359.2
chr14_+_39703112	4.23	ENST00000555143.1	MIA2	melanoma inhibitory activity 2
		ENST00000280082.3
chr4_+_155484103	4.21	ENST00000302068.4	FGB	fibrinogen beta chain
chr4_-_155511887	3.87	ENST00000302053.3	FGA	fibrinogen alpha chain
		ENST00000403106.3
chr4_-_110723335	3.33	ENST00000394634.2	CFI	complement factor I
chr4_+_155484155	3.21	ENST00000509493.1	FGB	fibrinogen beta chain
chr14_+_39703084	3.07	ENST00000553728.1	RP11-407N17.3	cTAGE family member 5 isoform 4
chr4_-_110723194	2.98	ENST00000394635.3	CFI	complement factor I
chr16_+_21244986	2.78	ENST00000311620.5	ANKS4B	ankyrin repeat and sterile alpha motif domain containing 4B
chr20_+_43029911	2.12	ENST00000443598.2	HNF4A	hepatocyte nuclear factor 4, alpha
		ENST00000316099.4
		ENST00000415691.2
Showing 1 to 10 of 173 entries
Previous
1
2
3
4
5
…
18
Next
Gene Ontology Analysis
Gene overrepresentation in molecular_function category:
Search:
Show 102550100 entries
Log-likelihood per target	Total log-likelihood	Term	Description
0.1	7.4	GO:0051087	chaperone binding(GO:0051087)
0.2	7.3	GO:0005044	scavenger receptor activity(GO:0005044)
0.1	4.6	GO:0004867	serine-type endopeptidase inhibitor activity(GO:0004867)
0.1	4.4	GO:0005504	fatty acid binding(GO:0005504)
0.0	3.6	GO:0030674	protein binding, bridging(GO:0030674)
0.7	2.8	GO:0047035	testosterone dehydrogenase (NAD+) activity(GO:0047035)
0.2	2.0	GO:0008009	chemokine activity(GO:0008009)
0.1	1.9	GO:0015926	glucosidase activity(GO:0015926)
0.1	1.6	GO:0008239	dipeptidyl-peptidase activity(GO:0008239)
0.4	1.5	GO:1990405	protein antigen binding(GO:1990405)
Showing 1 to 10 of 54 entries
Previous
1
2
3
4
5
6
Next
Gene overrepresentation in cellular_component category:
Search:
Show 102550100 entries
Log-likelihood per target	Total log-likelihood	Term	Description
0.0	14.2	GO:0005788	endoplasmic reticulum lumen(GO:0005788)
0.0	12.5	GO:0005615	extracellular space(GO:0005615)
1.0	11.5	GO:0005577	fibrinogen complex(GO:0005577)
0.1	4.2	GO:0070971	endoplasmic reticulum exit site(GO:0070971)
0.0	3.6	GO:0005903	brush border(GO:0005903)
0.3	2.6	GO:0046581	intercellular canaliculus(GO:0046581)
0.1	2.5	GO:0031526	brush border membrane(GO:0031526)
0.3	2.0	GO:0005579	membrane attack complex(GO:0005579)
0.5	1.5	GO:0044218	other organism cell membrane(GO:0044218) other organism membrane(GO:0044279)
0.1	1.2	GO:0045179	apical cortex(GO:0045179)
Showing 1 to 10 of 31 entries
Previous
1
2
3
4
Next
Gene overrepresentation in C2:CP category:
Search:
Show 102550100 entries
Log-likelihood per target	Total log-likelihood	Term	Description
0.2	13.4	PID HNF3B PATHWAY	FOXA2 and FOXA3 transcription factor networks
0.3	11.4	PID INTEGRIN2 PATHWAY	Beta2 integrin cell surface interactions
0.0	8.3	NABA ECM REGULATORS	Genes encoding enzymes and their regulators involved in the remodeling of the extracellular matrix
0.0	1.5	PID AVB3 INTEGRIN PATHWAY	Integrins in angiogenesis
0.0	1.4	PID HDAC CLASSIII PATHWAY	Signaling events mediated by HDAC Class III
0.0	1.0	PID CDC42 REG PATHWAY	Regulation of CDC42 activity
0.0	1.0	PID FGF PATHWAY	FGF signaling pathway
0.1	0.8	ST STAT3 PATHWAY	STAT3 Pathway
0.0	0.8	PID ERBB4 PATHWAY	ErbB4 signaling events
0.0	0.7	PID IL2 STAT5 PATHWAY	IL2 signaling events mediated by STAT5
Showing 1 to 10 of 12 entries
Previous
1
2
Next
Gene overrepresentation in C2:CP:REACTOME category:
Search:
Show 102550100 entries
Log-likelihood per target	Total log-likelihood	Term	Description
0.9	12.0	REACTOME COMMON PATHWAY	Genes involved in Common Pathway
0.5	7.8	REACTOME REGULATION OF COMPLEMENT CASCADE	Genes involved in Regulation of Complement cascade
0.1	3.1	REACTOME REGULATION OF GENE EXPRESSION IN BETA CELLS	Genes involved in Regulation of gene expression in beta cells
0.2	2.0	REACTOME COMPLEMENT CASCADE	Genes involved in Complement cascade
0.0	1.9	REACTOME RESPONSE TO ELEVATED PLATELET CYTOSOLIC CA2	Genes involved in Response to elevated platelet cytosolic Ca2+
0.1	1.5	REACTOME DEGRADATION OF THE EXTRACELLULAR MATRIX	Genes involved in Degradation of the extracellular matrix
0.1	1.4	REACTOME SYNTHESIS SECRETION AND INACTIVATION OF GIP	Genes involved in Synthesis, Secretion, and Inactivation of Glucose-dependent Insulinotropic Polypeptide (GIP)
0.3	1.3	REACTOME RECYCLING OF BILE ACIDS AND SALTS	Genes involved in Recycling of bile acids and salts
0.1	1.2	REACTOME CHYLOMICRON MEDIATED LIPID TRANSPORT	Genes involved in Chylomicron-mediated lipid transport
0.1	1.2	REACTOME ABC FAMILY PROTEINS MEDIATED TRANSPORT	Genes involved in ABC-family proteins mediated transport
Showing 1 to 10 of 26 entries
Previous
1
2
3
Next
Gene overrepresentation in biological_process category:
Search:
Show 102550100 entries
Log-likelihood per target	Total log-likelihood	Term	Description
2.3	11.4	GO:0043152	induction of bacterial agglutination(GO:0043152)
0.8	8.3	GO:0001542	ovulation from ovarian follicle(GO:0001542)
0.2	7.9	GO:0006958	complement activation, classical pathway(GO:0006958)
0.5	4.6	GO:0055091	phospholipid homeostasis(GO:0055091)
1.0	3.0	GO:1904970	brush border assembly(GO:1904970)
0.7	2.0	GO:0010760	negative regulation of macrophage chemotaxis(GO:0010760)
0.5	2.0	GO:0051801	cytolysis in other organism involved in symbiotic interaction(GO:0051801)
0.9	1.8	GO:0061370	testosterone biosynthetic process(GO:0061370)
0.0	1.7	GO:0006953	acute-phase response(GO:0006953)
0.4	1.5	GO:0052047	interaction with other organism via secreted substance involved in symbiotic interaction(GO:0052047)
Showing 1 to 10 of 67 entries
Previous
1
2
3
4
5
6
7
Next

## Sheet: TAL1
Top targets:
Search:
Show 102550100 entries
Promoter	Score	Transcript	Gene	Gene Info
chr3_+_186330712	2.12	ENST00000411641.2	AHSG	alpha-2-HS-glycoprotein
		ENST00000273784.5
chr2_-_21266816	1.99	ENST00000399256.4	APOB	apolipoprotein B
chr5_-_42811986	1.97	ENST00000511224.1	SEPP1	selenoprotein P, plasma, 1
		ENST00000507920.1
		ENST00000510965.1
chr2_-_218808771	1.83	ENST00000449814.1	TNS1	tensin 1
		ENST00000171887.4
chr6_+_123110302	1.78	ENST00000368440.4	SMPDL3A	sphingomyelin phosphodiesterase, acid-like 3A
chr2_-_21266935	1.55	ENST00000233242.1	APOB	apolipoprotein B
chr11_+_74862032	1.55	ENST00000289575.5	SLCO2B1	solute carrier organic anion transporter family, member 2B1
		ENST00000341411.4
chr7_+_30960915	1.54	ENST00000441328.2	AQP1	aquaporin 1 (Colton blood group)
		ENST00000409899.1
		ENST00000409611.1
chr5_+_135364584	1.53	ENST00000442011.2	TGFBI	transforming growth factor, beta-induced, 68kDa
		ENST00000305126.8
chr11_+_74862140	1.46	ENST00000525650.1	SLCO2B1	solute carrier organic anion transporter family, member 2B1
		ENST00000454962.2
Showing 1 to 10 of 200 entries
Previous
1
2
3
4
5
…
20
Next
Gene Ontology Analysis
Gene overrepresentation in C2:CP category:
Search:
Show 102550100 entries
Log-likelihood per target	Total log-likelihood	Term	Description
0.1	14.5	NABA ECM REGULATORS	Genes encoding enzymes and their regulators involved in the remodeling of the extracellular matrix
0.1	9.2	PID HNF3A PATHWAY	FOXA1 transcription factor network
0.0	5.7	NABA ECM AFFILIATED	Genes encoding proteins affiliated structurally or functionally to extracellular matrix proteins
0.0	5.6	NABA ECM GLYCOPROTEINS	Genes encoding structural ECM glycoproteins
0.0	4.6	NABA MATRISOME	Ensemble of genes encoding extracellular matrix and extracellular matrix-associated proteins
0.1	4.4	NABA COLLAGENS	Genes encoding collagen proteins
0.1	4.4	PID HNF3B PATHWAY	FOXA2 and FOXA3 transcription factor networks
0.1	3.1	PID NFAT TFPATHWAY	Calcineurin-regulated NFAT-dependent transcription in lymphocytes
0.1	3.0	NABA PROTEOGLYCANS	Genes encoding proteoglycans
0.1	2.7	PID INTEGRIN2 PATHWAY	Beta2 integrin cell surface interactions
Showing 1 to 10 of 76 entries
Previous
1
2
3
4
5
…
8
Next
Gene overrepresentation in biological_process category:
Search:
Show 102550100 entries
Log-likelihood per target	Total log-likelihood	Term	Description
0.1	5.5	GO:0006953	acute-phase response(GO:0006953)
0.9	5.2	GO:0034371	triglyceride-rich lipoprotein particle remodeling(GO:0034370) chylomicron remodeling(GO:0034371)
0.2	4.9	GO:0043252	sodium-independent organic anion transport(GO:0043252)
0.4	3.5	GO:2000467	positive regulation of glycogen (starch) synthase activity(GO:2000467)
0.2	3.1	GO:0042340	keratan sulfate catabolic process(GO:0042340)
0.0	3.0	GO:0030574	collagen catabolic process(GO:0030574)
0.5	2.9	GO:0072180	mesonephric duct morphogenesis(GO:0072180)
0.0	2.5	GO:0018279	protein N-linked glycosylation via asparagine(GO:0018279)
0.4	2.4	GO:0071279	cellular response to cobalt ion(GO:0071279)
0.5	2.3	GO:0061107	seminal vesicle development(GO:0061107)
Showing 1 to 10 of 723 entries
Previous
1
2
3
4
5
…
73
Next
Gene overrepresentation in cellular_component category:
Search:
Show 102550100 entries
Log-likelihood per target	Total log-likelihood	Term	Description
0.1	12.5	GO:0031093	platelet alpha granule lumen(GO:0031093)
0.1	5.9	GO:0005796	Golgi lumen(GO:0005796)
1.1	4.6	GO:0034363	intermediate-density lipoprotein particle(GO:0034363)
0.0	4.2	GO:0005578	proteinaceous extracellular matrix(GO:0005578)
0.0	4.0	GO:0005788	endoplasmic reticulum lumen(GO:0005788)
0.1	3.3	GO:0005581	collagen trimer(GO:0005581)
0.0	3.3	GO:0005604	basement membrane(GO:0005604)
0.1	3.1	GO:0046658	anchored component of plasma membrane(GO:0046658)
0.2	2.7	GO:0098643	fibrillar collagen trimer(GO:0005583) banded collagen fibril(GO:0098643)
0.0	2.5	GO:0005770	late endosome(GO:0005770)
Showing 1 to 10 of 242 entries
Previous
1
2
3
4
5
…
25
Next
Gene overrepresentation in molecular_function category:
Search:
Show 102550100 entries
Log-likelihood per target	Total log-likelihood	Term	Description
0.1	9.0	GO:0004867	serine-type endopeptidase inhibitor activity(GO:0004867)
0.1	6.2	GO:0005179	hormone activity(GO:0005179)
0.4	4.6	GO:0015125	bile acid transmembrane transporter activity(GO:0015125)
0.1	4.3	GO:0005518	collagen binding(GO:0005518)
0.9	3.7	GO:0035473	lipase binding(GO:0035473)
0.2	3.1	GO:0048407	platelet-derived growth factor binding(GO:0048407)
0.0	3.1	GO:0008307	structural constituent of muscle(GO:0008307)
0.4	3.0	GO:0004499	N,N-dimethylaniline monooxygenase activity(GO:0004499)
0.1	2.7	GO:0005540	hyaluronic acid binding(GO:0005540)
0.6	2.5	GO:0060422	peptidyl-dipeptidase inhibitor activity(GO:0060422)
Showing 1 to 10 of 441 entries
Previous
1
2
3
4
5
…
45
Next
Gene overrepresentation in C2:CP:REACTOME category:
Search:
Show 102550100 entries
Log-likelihood per target	Total log-likelihood	Term	Description
0.3	5.2	REACTOME CHYLOMICRON MEDIATED LIPID TRANSPORT	Genes involved in Chylomicron-mediated lipid transport
0.2	4.9	REACTOME REGULATION OF INSULIN LIKE GROWTH FACTOR IGF ACTIVITY BY INSULIN LIKE GROWTH FACTOR BINDING PROTEINS IGFBPS	Genes involved in Regulation of Insulin-like Growth Factor (IGF) Activity by Insulin-like Growth Factor Binding Proteins (IGFBPs)
0.1	4.4	REACTOME COLLAGEN FORMATION	Genes involved in Collagen formation
0.3	4.3	REACTOME TRANSPORT OF ORGANIC ANIONS	Genes involved in Transport of organic anions
0.1	3.3	REACTOME AMYLOIDS	Genes involved in Amyloids
0.2	3.1	REACTOME KERATAN SULFATE DEGRADATION	Genes involved in Keratan sulfate degradation
0.1	2.9	REACTOME NITRIC OXIDE STIMULATES GUANYLATE CYCLASE	Genes involved in Nitric oxide stimulates guanylate cyclase
0.0	2.9	REACTOME CLASS B 2 SECRETIN FAMILY RECEPTORS	Genes involved in Class B/2 (Secretin family receptors)
0.1	2.8	REACTOME HS GAG DEGRADATION	Genes involved in HS-GAG degradation
0.1	2.5	REACTOME AMINO ACID SYNTHESIS AND INTERCONVERSION TRANSAMINATION	Genes involved in Amino acid synthesis and interconversion (transamination)
Showing 1 to 10 of 122 entries
Previous
1
2
3
4
5
…
13
Next

## Sheet: SP4_PML
Top targets:
Search:
Show 102550100 entries
Promoter	Score	Transcript	Gene	Gene Info
chr2_+_181845298	2.94	ENST00000410062.4	UBE2E3	ubiquitin-conjugating enzyme E2E 3
chr20_-_23618582	2.82	ENST00000398411.1	CST3	cystatin C
		ENST00000376925.3
chr6_+_168227552	2.62	ENST00000400825.4	MLLT4	myeloid/lymphoid or mixed-lineage leukemia (trithorax homolog, Drosophila); translocated to, 4
chr17_+_7788104	2.40	ENST00000380358.4	CHD3	chromodomain helicase DNA binding protein 3
chr21_+_47518011	2.27	ENST00000300527.4	COL6A2	collagen, type VI, alpha 2
		ENST00000357838.4
		ENST00000310645.5
chr14_+_102027688	2.26	ENST00000510508.4	DIO3	deiodinase, iodothyronine, type III
		ENST00000359323.3
chr11_-_2906979	2.15	ENST00000380725.1	CDKN1C	cyclin-dependent kinase inhibitor 1C (p57, Kip2)
		ENST00000313407.6
		ENST00000430149.2
		ENST00000440480.2
		ENST00000414822.3
chr1_+_9352939	2.04	ENST00000328089.6	SPSB1	splA/ryanodine receptor domain and SOCS box containing 1
chr6_-_3752222	2.00	ENST00000380283.4	PXDC1	PX domain containing 1
chr6_+_4776580	1.99	ENST00000397588.3	CDYL	chromodomain protein, Y-like
Showing 1 to 10 of 200 entries
Previous
1
2
3
4
5
…
20
Next
Gene Ontology Analysis
Gene overrepresentation in molecular_function category:
Search:
Show 102550100 entries
Log-likelihood per target	Total log-likelihood	Term	Description
0.0	9.8	GO:0045296	cadherin binding(GO:0045296)
0.2	9.0	GO:0005159	insulin-like growth factor receptor binding(GO:0005159)
0.1	8.2	GO:0004222	metalloendopeptidase activity(GO:0004222)
0.2	7.7	GO:0071889	14-3-3 protein binding(GO:0071889)
0.1	7.3	GO:0005201	extracellular matrix structural constituent(GO:0005201)
0.0	6.3	GO:0051015	actin filament binding(GO:0051015)
0.1	6.1	GO:0061631	ubiquitin conjugating enzyme activity(GO:0061631) ubiquitin-like protein conjugating enzyme activity(GO:0061650)
0.2	5.5	GO:0035925	mRNA 3'-UTR AU-rich region binding(GO:0035925)
0.2	5.4	GO:0042171	lysophosphatidic acid acyltransferase activity(GO:0042171) lysophospholipid acyltransferase activity(GO:0071617)
0.4	5.3	GO:0030618	transforming growth factor beta receptor, pathway-specific cytoplasmic mediator activity(GO:0030618)
Showing 1 to 10 of 659 entries
Previous
1
2
3
4
5
…
66
Next
Gene overrepresentation in biological_process category:
Search:
Show 102550100 entries
Log-likelihood per target	Total log-likelihood	Term	Description
0.2	6.2	GO:0031581	hemidesmosome assembly(GO:0031581)
0.1	5.2	GO:0030574	collagen catabolic process(GO:0030574)
0.1	4.9	GO:0070534	protein K63-linked ubiquitination(GO:0070534)
0.2	4.8	GO:0070208	protein heterotrimerization(GO:0070208)
0.2	4.4	GO:0046341	CDP-diacylglycerol metabolic process(GO:0046341)
0.5	4.1	GO:2000467	positive regulation of glycogen (starch) synthase activity(GO:2000467)
0.3	3.4	GO:0007379	segment specification(GO:0007379)
0.8	3.3	GO:0051541	elastin metabolic process(GO:0051541)
0.1	3.3	GO:0001893	maternal placenta development(GO:0001893)
0.3	3.1	GO:0006498	N-terminal protein lipidation(GO:0006498)
Showing 1 to 10 of 1,248 entries
Previous
1
2
3
4
5
…
125
Next
Gene overrepresentation in cellular_component category:
Search:
Show 102550100 entries
Log-likelihood per target	Total log-likelihood	Term	Description
0.0	24.9	GO:0005615	extracellular space(GO:0005615)
0.2	13.2	GO:0005581	collagen trimer(GO:0005581)
0.1	12.2	GO:0005604	basement membrane(GO:0005604)
0.0	9.0	GO:0016607	nuclear speck(GO:0016607)
0.0	9.0	GO:0044432	endoplasmic reticulum part(GO:0044432)
0.1	8.4	GO:0043202	lysosomal lumen(GO:0043202)
0.0	7.7	GO:0005578	proteinaceous extracellular matrix(GO:0005578)
0.1	6.1	GO:0005801	cis-Golgi network(GO:0005801)
0.0	5.7	GO:0005911	cell-cell junction(GO:0005911)
0.1	5.5	GO:0033116	endoplasmic reticulum-Golgi intermediate compartment membrane(GO:0033116)
Showing 1 to 10 of 396 entries
Previous
1
2
3
4
5
…
40
Next
Gene overrepresentation in C2:CP category:
Search:
Show 102550100 entries
Log-likelihood per target	Total log-likelihood	Term	Description
0.1	20.7	NABA ECM REGULATORS	Genes encoding enzymes and their regulators involved in the remodeling of the extracellular matrix
0.1	17.3	NABA ECM GLYCOPROTEINS	Genes encoding structural ECM glycoproteins
0.1	11.1	NABA ECM AFFILIATED	Genes encoding proteins affiliated structurally or functionally to extracellular matrix proteins
0.2	10.5	NABA COLLAGENS	Genes encoding collagen proteins
0.1	7.2	PID TGFBR PATHWAY	TGF-beta receptor signaling
0.1	6.5	PID CMYB PATHWAY	C-MYB transcription factor network
0.1	6.3	PID SHP2 PATHWAY	SHP2 signaling
0.2	5.6	PID WNT SIGNALING PATHWAY	Wnt signaling network
0.1	5.5	PID RHOA REG PATHWAY	Regulation of RhoA activity
0.1	5.4	PID IFNG PATHWAY	IFN-gamma pathway
Showing 1 to 10 of 112 entries
Previous
1
2
3
4
5
…
12
Next
Gene overrepresentation in C2:CP:REACTOME category:
Search:
Show 102550100 entries
Log-likelihood per target	Total log-likelihood	Term	Description
0.2	13.5	REACTOME COLLAGEN FORMATION	Genes involved in Collagen formation
0.1	7.8	REACTOME ACTIVATION OF CHAPERONE GENES BY XBP1S	Genes involved in Activation of Chaperone Genes by XBP1(S)
0.0	6.8	REACTOME ANTIGEN PROCESSING UBIQUITINATION PROTEASOME DEGRADATION	Genes involved in Antigen processing: Ubiquitination & Proteasome degradation
0.2	6.4	REACTOME HS GAG DEGRADATION	Genes involved in HS-GAG degradation
0.3	5.8	REACTOME REGULATION OF INSULIN LIKE GROWTH FACTOR IGF ACTIVITY BY INSULIN LIKE GROWTH FACTOR BINDING PROTEINS IGFBPS	Genes involved in Regulation of Insulin-like Growth Factor (IGF) Activity by Insulin-like Growth Factor Binding Proteins (IGFBPs)
0.2	5.6	REACTOME REGULATION OF AMPK ACTIVITY VIA LKB1	Genes involved in Regulation of AMPK activity via LKB1
0.2	5.3	REACTOME CASPASE MEDIATED CLEAVAGE OF CYTOSKELETAL PROTEINS	Genes involved in Caspase-mediated cleavage of cytoskeletal proteins
0.1	5.1	REACTOME ADHERENS JUNCTIONS INTERACTIONS	Genes involved in Adherens junctions interactions
0.0	4.7	REACTOME SIGNALING BY RHO GTPASES	Genes involved in Signaling by Rho GTPases
0.2	4.2	REACTOME TGF BETA RECEPTOR SIGNALING IN EMT EPITHELIAL TO MESENCHYMAL TRANSITION	Genes involved in TGF-beta receptor signaling in EMT (epithelial to mesenchymal transition)
Showing 1 to 10 of 167 entries
Previous
1
2
3
4
5
…
17
Next

## Sheet: BCL6
Top targets:
Search:
Show 102550100 entries
Promoter	Score	Transcript	Gene	Gene Info
chr4_-_155511887	3.43	ENST00000302053.3	FGA	fibrinogen alpha chain
		ENST00000403106.3
chr3_-_93692781	3.09	ENST00000394236.3	PROS1	protein S (alpha)
chr1_-_230850043	2.09	ENST00000366667.4	AGT	angiotensinogen (serpin peptidase inhibitor, clade A, member 8)
chr17_-_26697304	1.53	ENST00000536498.1	VTN	vitronectin
chr12_-_10151773	1.49	ENST00000298527.6	CLEC1B	C-type lectin domain family 1, member B
		ENST00000348658.4
chrX_-_139866723	1.48	ENST00000370532.2	CDR1	cerebellar degeneration-related protein 1, 34kDa
chr11_+_46740730	1.32	ENST00000311907.5	F2	coagulation factor II (thrombin)
		ENST00000530231.1
		ENST00000442468.1
chr4_+_155484103	1.24	ENST00000302068.4	FGB	fibrinogen beta chain
chr15_+_84322827	1.17	ENST00000286744.5	ADAMTSL3	ADAMTS-like 3
		ENST00000567476.1
chr3_-_93692681	1.07	ENST00000348974.4	PROS1	protein S (alpha)
Showing 1 to 10 of 200 entries
Previous
1
2
3
4
5
…
20
Next
Gene Ontology Analysis
Gene overrepresentation in molecular_function category:
Search:
Show 102550100 entries
Log-likelihood per target	Total log-likelihood	Term	Description
0.0	6.4	GO:0030674	protein binding, bridging(GO:0030674)
0.0	5.6	GO:0004866	endopeptidase inhibitor activity(GO:0004866)
0.0	3.4	GO:0004222	metalloendopeptidase activity(GO:0004222)
0.1	2.1	GO:0031702	type 1 angiotensin receptor binding(GO:0031702)
0.2	1.9	GO:0030247	pattern binding(GO:0001871) polysaccharide binding(GO:0030247)
0.1	1.5	GO:0001965	G-protein alpha-subunit binding(GO:0001965)
0.0	1.5	GO:0050750	low-density lipoprotein particle receptor binding(GO:0050750)
0.5	1.4	GO:0005260	channel-conductance-controlling ATPase activity(GO:0005260)
0.0	1.4	GO:0043539	protein serine/threonine kinase activator activity(GO:0043539)
0.4	1.3	GO:0070053	thrombospondin receptor activity(GO:0070053)
Showing 1 to 10 of 90 entries
Previous
1
2
3
4
5
…
9
Next
Gene overrepresentation in biological_process category:
Search:
Show 102550100 entries
Log-likelihood per target	Total log-likelihood	Term	Description
1.1	5.6	GO:0043152	induction of bacterial agglutination(GO:0043152)
0.3	4.2	GO:0018214	peptidyl-glutamic acid carboxylation(GO:0017187) protein carboxylation(GO:0018214)
0.7	2.1	GO:0010533	regulation of activation of Janus kinase activity(GO:0010533) lysine import(GO:0034226) L-lysine import(GO:0061461) L-lysine import into cell(GO:1903410)
0.1	1.6	GO:0006958	complement activation, classical pathway(GO:0006958)
0.0	1.6	GO:0000188	inactivation of MAPK activity(GO:0000188)
0.2	1.5	GO:0061302	smooth muscle cell-matrix adhesion(GO:0061302)
0.0	1.5	GO:0030220	platelet formation(GO:0030220)
0.5	1.4	GO:1902941	positive regulation of cyclic nucleotide-gated ion channel activity(GO:1902161) regulation of voltage-gated chloride channel activity(GO:1902941) positive regulation of voltage-gated chloride channel activity(GO:1902943) positive regulation of inorganic anion transmembrane transport(GO:1903797)
0.2	1.4	GO:2000467	positive regulation of glycogen (starch) synthase activity(GO:2000467)
0.4	1.3	GO:0070944	neutrophil mediated cytotoxicity(GO:0070942) neutrophil mediated killing of symbiont cell(GO:0070943) neutrophil mediated killing of bacterium(GO:0070944) neutrophil mediated killing of gram-negative bacterium(GO:0070945) positive regulation of phospholipase C-activating G-protein coupled receptor signaling pathway(GO:1900738)
Showing 1 to 10 of 140 entries
Previous
1
2
3
4
5
…
14
Next
Gene overrepresentation in C2:CP category:
Search:
Show 102550100 entries
Log-likelihood per target	Total log-likelihood	Term	Description
0.2	6.9	PID INTEGRIN2 PATHWAY	Beta2 integrin cell surface interactions
0.0	6.2	NABA ECM REGULATORS	Genes encoding enzymes and their regulators involved in the remodeling of the extracellular matrix
0.1	2.3	PID PRL SIGNALING EVENTS PATHWAY	Signaling events mediated by PRL
0.0	2.2	NABA ECM AFFILIATED	Genes encoding proteins affiliated structurally or functionally to extracellular matrix proteins
0.0	2.2	NABA ECM GLYCOPROTEINS	Genes encoding structural ECM glycoproteins
0.1	1.5	PID INTEGRIN5 PATHWAY	Beta5 beta6 beta7 and beta8 integrin cell surface interactions
0.1	1.3	PID THROMBIN PAR4 PATHWAY	PAR4-mediated thrombin signaling events
0.0	1.3	PID AJDISS 2PATHWAY	Posttranslational regulation of adherens junction stability and dissassembly
0.0	1.2	PID HNF3A PATHWAY	FOXA1 transcription factor network
0.0	1.0	PID LYMPH ANGIOGENESIS PATHWAY	VEGFR3 signaling in lymphatic endothelium
Showing 1 to 10 of 23 entries
Previous
1
2
3
Next
Gene overrepresentation in cellular_component category:
Search:
Show 102550100 entries
Log-likelihood per target	Total log-likelihood	Term	Description
0.1	7.8	GO:0072562	blood microparticle(GO:0072562)
0.6	6.7	GO:0005577	fibrinogen complex(GO:0005577)
0.0	4.6	GO:0005578	proteinaceous extracellular matrix(GO:0005578)
0.0	1.6	GO:0031093	platelet alpha granule lumen(GO:0031093)
0.5	1.5	GO:0071062	rough endoplasmic reticulum lumen(GO:0048237) alphav-beta3 integrin-vitronectin complex(GO:0071062)
0.3	1.4	GO:0031205	endoplasmic reticulum Sec complex(GO:0031205)
0.2	1.4	GO:0031089	platelet dense granule lumen(GO:0031089)
0.1	1.1	GO:0034366	spherical high-density lipoprotein particle(GO:0034366)
0.1	0.9	GO:0071953	elastic fiber(GO:0071953)
0.0	0.7	GO:0031092	platelet alpha granule membrane(GO:0031092)
Showing 1 to 10 of 44 entries
Previous
1
2
3
4
5
Next
Gene overrepresentation in C2:CP:REACTOME category:
Search:
Show 102550100 entries
Log-likelihood per target	Total log-likelihood	Term	Description
0.9	12.1	REACTOME COMMON PATHWAY	Genes involved in Common Pathway
0.0	4.0	REACTOME G ALPHA I SIGNALLING EVENTS	Genes involved in G alpha (i) signalling events
0.2	2.4	REACTOME REGULATION OF COMPLEMENT CASCADE	Genes involved in Regulation of Complement cascade
0.0	2.3	REACTOME RESPONSE TO ELEVATED PLATELET CYTOSOLIC CA2	Genes involved in Response to elevated platelet cytosolic Ca2+
0.1	1.8	REACTOME REGULATION OF INSULIN LIKE GROWTH FACTOR IGF ACTIVITY BY INSULIN LIKE GROWTH FACTOR BINDING PROTEINS IGFBPS	Genes involved in Regulation of Insulin-like Growth Factor (IGF) Activity by Insulin-like Growth Factor Binding Proteins (IGFBPs)
0.0	1.5	REACTOME INTEGRIN CELL SURFACE INTERACTIONS	Genes involved in Integrin cell surface interactions
0.1	1.4	REACTOME ABC FAMILY PROTEINS MEDIATED TRANSPORT	Genes involved in ABC-family proteins mediated transport
0.1	0.9	REACTOME IL 6 SIGNALING	Genes involved in Interleukin-6 signaling
0.0	0.8	REACTOME TIE2 SIGNALING	Genes involved in Tie2 Signaling
0.1	0.6	REACTOME ELEVATION OF CYTOSOLIC CA2 LEVELS	Genes involved in Elevation of cytosolic Ca2+ levels
Showing 1 to 10 of 30 entries
Previous
1
2
3
Next

## Sheet: BATF
Top targets:
Search:
Show 102550100 entries
Promoter	Score	Transcript	Gene	Gene Info
chr14_-_94854926	1.47	ENST00000402629.1	SERPINA1	serpin peptidase inhibitor, clade A (alpha-1 antiproteinase, antitrypsin), member 1
		ENST00000556091.1
		ENST00000554720.1
chr9_-_116840728	1.38	ENST00000265132.3	AMBP	alpha-1-microglobulin/bikunin precursor
chr3_-_149095652	1.31	ENST00000305366.3	TM4SF1	transmembrane 4 L six family member 1
chr12_-_91573249	1.26	ENST00000550099.1	DCN	decorin
		ENST00000546391.1
		ENST00000551354.1
chr7_-_45956856	1.18	ENST00000428530.1	IGFBP3	insulin-like growth factor binding protein 3
chr6_+_150690028	1.17	ENST00000229447.5	IYD	iodotyrosine deiodinase
		ENST00000344419.3
chr5_-_156486120	1.15	ENST00000522693.1	HAVCR1	hepatitis A virus cellular receptor 1
chr6_+_150690133	1.14	ENST00000392255.3	IYD	iodotyrosine deiodinase
		ENST00000500320.3
chr7_-_45957011	1.13	ENST00000417621.1	IGFBP3	insulin-like growth factor binding protein 3
chrX_-_132887729	1.11	ENST00000406757.2	GPC3	glypican 3
Showing 1 to 10 of 200 entries
Previous
1
2
3
4
5
…
20
Next
Gene Ontology Analysis
Gene overrepresentation in molecular_function category:
Search:
Show 102550100 entries
Log-likelihood per target	Total log-likelihood	Term	Description
0.0	0.3	GO:0017017	non-membrane spanning protein tyrosine phosphatase activity(GO:0004726) MAP kinase tyrosine/serine/threonine phosphatase activity(GO:0017017)
0.1	0.2	GO:1990404	protein ADP-ribosylase activity(GO:1990404)
0.0	0.1	GO:0016434	rRNA (cytosine) methyltransferase activity(GO:0016434)
0.0	0.1	GO:0019776	Atg8 ligase activity(GO:0019776)
0.0	0.1	GO:0001206	transcriptional repressor activity, RNA polymerase II distal enhancer sequence-specific binding(GO:0001206)
0.0	0.1	GO:0005149	interleukin-1 receptor binding(GO:0005149)
0.0	0.0	GO:0098770	FBXO family protein binding(GO:0098770)
Showing 1 to 7 of 7 entries
Previous
1
Next
Gene overrepresentation in biological_process category:
Search:
Show 102550100 entries
Log-likelihood per target	Total log-likelihood	Term	Description
0.0	0.3	GO:0035970	peptidyl-threonine dephosphorylation(GO:0035970)
0.1	0.2	GO:0018312	peptidyl-serine ADP-ribosylation(GO:0018312)
0.1	0.2	GO:0035022	positive regulation of Rac protein signal transduction(GO:0035022)
0.0	0.1	GO:0071306	cellular response to vitamin E(GO:0071306)
0.0	0.1	GO:1903774	positive regulation of viral budding via host ESCRT complex(GO:1903774)
0.0	0.1	GO:0021896	forebrain astrocyte differentiation(GO:0021896) forebrain astrocyte development(GO:0021897) gamma-aminobutyric acid secretion, neurotransmission(GO:0061534)
0.0	0.1	GO:1901895	negative regulation of calcium-transporting ATPase activity(GO:1901895)
0.0	0.1	GO:0006616	SRP-dependent cotranslational protein targeting to membrane, translocation(GO:0006616)
0.0	0.1	GO:0044034	negative stranded viral RNA replication(GO:0039689) multi-organism biosynthetic process(GO:0044034)
0.0	0.1	GO:1902626	assembly of large subunit precursor of preribosome(GO:1902626)
Showing 1 to 10 of 12 entries
Previous
1
2
Next
Gene overrepresentation in cellular_component category:
Search:
Show 102550100 entries
Log-likelihood per target	Total log-likelihood	Term	Description
0.1	7.8	GO:0031093	platelet alpha granule lumen(GO:0031093)
0.2	2.9	GO:0098647	collagen type VI trimer(GO:0005589) collagen beaded filament(GO:0098647)
0.0	2.7	GO:0005578	proteinaceous extracellular matrix(GO:0005578)
0.0	2.6	GO:0072562	blood microparticle(GO:0072562)
0.0	2.5	GO:0005901	caveola(GO:0005901)
0.3	2.3	GO:0042567	insulin-like growth factor ternary complex(GO:0042567)
0.0	1.6	GO:0031902	late endosome membrane(GO:0031902)
0.1	1.4	GO:0031088	platelet dense granule membrane(GO:0031088)
0.1	1.4	GO:0031362	anchored component of external side of plasma membrane(GO:0031362)
0.1	1.4	GO:0045095	keratin filament(GO:0045095)
Showing 1 to 10 of 102 entries
Previous
1
2
3
4
5
…
11
Next
Gene overrepresentation in cellular_component category:
Search:
Show 102550100 entries
Log-likelihood per target	Total log-likelihood	Term	Description
0.0	0.1	GO:0005584	collagen type I trimer(GO:0005584)
0.0	0.1	GO:0045323	interleukin-1 receptor complex(GO:0045323)
0.0	0.1	GO:0034274	Atg12-Atg5-Atg16 complex(GO:0034274)
Showing 1 to 3 of 3 entries
Previous
1
Next
Gene overrepresentation in biological_process category:
Search:
Show 102550100 entries
Log-likelihood per target	Total log-likelihood	Term	Description
0.1	4.3	GO:0006953	acute-phase response(GO:0006953)
0.5	3.4	GO:0006570	tyrosine metabolic process(GO:0006570)
0.2	3.0	GO:1900747	negative regulation of vascular endothelial growth factor signaling pathway(GO:1900747)
0.4	2.5	GO:0052695	cellular glucuronidation(GO:0052695)
0.1	2.3	GO:0043568	positive regulation of insulin-like growth factor receptor signaling pathway(GO:0043568)
0.2	2.1	GO:2000467	positive regulation of glycogen (starch) synthase activity(GO:2000467)
0.1	1.9	GO:0032731	positive regulation of interleukin-1 beta production(GO:0032731)
0.3	1.8	GO:2000158	positive regulation of ubiquitin-specific protease activity(GO:2000158)
0.1	1.7	GO:0043252	sodium-independent organic anion transport(GO:0043252)
0.1	1.6	GO:0090026	positive regulation of monocyte chemotaxis(GO:0090026)
Showing 1 to 10 of 330 entries
Previous
1
2
3
4
5
…
33
Next
Gene overrepresentation in molecular_function category:
Search:
Show 102550100 entries
Log-likelihood per target	Total log-likelihood	Term	Description
0.1	6.6	GO:0004867	serine-type endopeptidase inhibitor activity(GO:0004867)
1.1	3.4	GO:0004447	iodide peroxidase activity(GO:0004447)
0.1	3.1	GO:0005179	hormone activity(GO:0005179)
0.1	3.0	GO:0015020	glucuronosyltransferase activity(GO:0015020)
0.0	3.0	GO:0050840	extracellular matrix binding(GO:0050840)
0.8	2.3	GO:0008160	protein tyrosine phosphatase activator activity(GO:0008160)
0.0	2.0	GO:0017112	Rab guanyl-nucleotide exchange factor activity(GO:0017112)
0.3	1.8	GO:0035800	deubiquitinase activator activity(GO:0035800)
0.5	1.5	GO:0015168	glycerol transmembrane transporter activity(GO:0015168)
0.2	1.5	GO:0019865	immunoglobulin binding(GO:0019865)
Showing 1 to 10 of 217 entries
Previous
1
2
3
4
5
…
22
Next
Gene overrepresentation in C2:CP:REACTOME category:
Search:
Show 102550100 entries
Log-likelihood per target	Total log-likelihood	Term	Description
0.0	5.8	REACTOME RESPONSE TO ELEVATED PLATELET CYTOSOLIC CA2	Genes involved in Response to elevated platelet cytosolic Ca2+
0.2	4.6	REACTOME REGULATION OF INSULIN LIKE GROWTH FACTOR IGF ACTIVITY BY INSULIN LIKE GROWTH FACTOR BINDING PROTEINS IGFBPS	Genes involved in Regulation of Insulin-like Growth Factor (IGF) Activity by Insulin-like Growth Factor Binding Proteins (IGFBPs)
0.5	3.8	REACTOME AMINE DERIVED HORMONES	Genes involved in Amine-derived hormones
0.1	3.0	REACTOME CS DS DEGRADATION	Genes involved in CS/DS degradation
0.2	2.9	REACTOME GLUCURONIDATION	Genes involved in Glucuronidation
0.0	2.2	REACTOME CELL JUNCTION ORGANIZATION	Genes involved in Cell junction organization
0.1	2.1	REACTOME TRANSPORT OF ORGANIC ANIONS	Genes involved in Transport of organic anions
0.1	1.6	REACTOME TRAF6 MEDIATED IRF7 ACTIVATION	Genes involved in TRAF6 mediated IRF7 activation
0.0	1.6	REACTOME PHASE1 FUNCTIONALIZATION OF COMPOUNDS	Genes involved in Phase 1 - Functionalization of compounds
0.4	1.5	REACTOME PASSIVE TRANSPORT BY AQUAPORINS	Genes involved in Passive Transport by Aquaporins
Showing 1 to 10 of 63 entries
Previous
1
2
3
4
5
6
7
Next
Gene overrepresentation in C2:CP category:
Search:
Show 102550100 entries
Log-likelihood per target	Total log-likelihood	Term	Description
0.1	4.8	PID FRA PATHWAY	Validated transcriptional targets of AP1 family members Fra1 and Fra2
0.1	3.7	PID HNF3A PATHWAY	FOXA1 transcription factor network
0.0	3.2	PID AJDISS 2PATHWAY	Posttranslational regulation of adherens junction stability and dissassembly
0.0	3.1	NABA ECM REGULATORS	Genes encoding enzymes and their regulators involved in the remodeling of the extracellular matrix
0.0	2.9	NABA ECM AFFILIATED	Genes encoding proteins affiliated structurally or functionally to extracellular matrix proteins
0.0	2.7	PID UPA UPAR PATHWAY	Urokinase-type plasminogen activator (uPA) and uPAR-mediated signaling
0.0	2.7	PID TAP63 PATHWAY	Validated transcriptional targets of TAp63 isoforms
0.0	2.4	NABA MATRISOME ASSOCIATED	Ensemble of genes encoding ECM-associated proteins including ECM-affilaited proteins, ECM regulators and secreted factors
0.0	2.3	NABA ECM GLYCOPROTEINS	Genes encoding structural ECM glycoproteins
0.0	2.1	PID HNF3B PATHWAY	FOXA2 and FOXA3 transcription factor networks
Showing 1 to 10 of 38 entries
Previous
1
2
3
4
Next

## Sheet: CEBPD
Top targets:
Search:
Show 102550100 entries
Promoter	Score	Transcript	Gene	Gene Info
chr3_+_186330712	2.67	ENST00000411641.2	AHSG	alpha-2-HS-glycoprotein
		ENST00000273784.5
chr4_+_55095428	1.88	ENST00000508170.1	PDGFRA	platelet-derived growth factor receptor, alpha polypeptide
		ENST00000512143.1
chr14_-_70263979	1.77	ENST00000216540.4	SLC10A1	solute carrier family 10 (sodium/bile acid cotransporter), member 1
chr8_-_134309335	1.61	ENST00000522890.1	NDRG1	N-myc downstream regulated 1
		ENST00000323851.7
		ENST00000518176.1
		ENST00000354944.5
		ENST00000537882.1
		ENST00000522476.1
		ENST00000518066.1
		ENST00000521544.1
		ENST00000518480.1
		ENST00000523892.1
chr1_+_154377669	1.61	ENST00000368485.3	IL6R	interleukin 6 receptor
		ENST00000344086.4
chr4_+_55095264	1.33	ENST00000257290.5	PDGFRA	platelet-derived growth factor receptor, alpha polypeptide
chr14_-_23285069	1.32	ENST00000554758.1	SLC7A7	solute carrier family 7 (amino acid transporter light chain, y+L system), member 7
		ENST00000397528.4
chr3_-_99594948	1.32	ENST00000471562.1	FILIP1L	filamin A interacting protein 1-like
		ENST00000495625.2
chr3_-_99595037	1.30	ENST00000383694.2	FILIP1L	filamin A interacting protein 1-like
chr12_-_123201337	1.29	ENST00000528880.2	HCAR3	hydroxycarboxylic acid receptor 3
Showing 1 to 10 of 200 entries
Previous
1
2
3
4
5
…
20
Next
Gene Ontology Analysis
Gene overrepresentation in cellular_component category:
Search:
Show 102550100 entries
Log-likelihood per target	Total log-likelihood	Term	Description
0.0	6.2	GO:0016323	basolateral plasma membrane(GO:0016323)
0.0	5.0	GO:0072562	blood microparticle(GO:0072562)
0.1	3.4	GO:0033017	sarcoplasmic reticulum membrane(GO:0033017)
0.0	3.2	GO:0005902	microvillus(GO:0005902)
0.0	2.7	GO:0055038	recycling endosome membrane(GO:0055038)
0.6	1.8	GO:0005896	interleukin-6 receptor complex(GO:0005896)
0.1	1.7	GO:0005577	fibrinogen complex(GO:0005577)
0.1	1.2	GO:0034366	spherical high-density lipoprotein particle(GO:0034366)
0.1	1.2	GO:0098647	collagen type VI trimer(GO:0005589) collagen beaded filament(GO:0098647)
0.0	1.2	GO:0005581	collagen trimer(GO:0005581)
Showing 1 to 10 of 19 entries
Previous
1
2
Next
Gene overrepresentation in molecular_function category:
Search:
Show 102550100 entries
Log-likelihood per target	Total log-likelihood	Term	Description
0.1	4.5	GO:0004869	cysteine-type endopeptidase inhibitor activity(GO:0004869)
0.2	4.4	GO:0015174	basic amino acid transmembrane transporter activity(GO:0015174)
0.4	3.8	GO:0031432	titin binding(GO:0031432)
0.8	3.2	GO:0005018	platelet-derived growth factor alpha-receptor activity(GO:0005018)
0.1	2.7	GO:0043015	gamma-tubulin binding(GO:0043015)
0.0	2.1	GO:0004712	protein serine/threonine/tyrosine kinase activity(GO:0004712)
0.0	2.0	GO:0005518	collagen binding(GO:0005518)
0.6	1.8	GO:0019981	interleukin-6 receptor activity(GO:0004915) interleukin-6 binding(GO:0019981)
0.4	1.8	GO:0008508	bile acid:sodium symporter activity(GO:0008508)
0.4	1.5	GO:0010859	calcium-dependent cysteine-type endopeptidase inhibitor activity(GO:0010859)
Showing 1 to 10 of 44 entries
Previous
1
2
3
4
5
Next
Gene overrepresentation in C2:CP category:
Search:
Show 102550100 entries
Log-likelihood per target	Total log-likelihood	Term	Description
0.1	4.0	ST WNT CA2 CYCLIC GMP PATHWAY	Wnt/Ca2+/cyclic GMP signaling.
0.0	3.9	PID MYC REPRESS PATHWAY	Validated targets of C-MYC transcriptional repression
0.1	3.2	PID PDGFRA PATHWAY	PDGFR-alpha signaling pathway
0.0	2.7	PID BMP PATHWAY	BMP receptor signaling
0.1	2.3	PID INTEGRIN2 PATHWAY	Beta2 integrin cell surface interactions
0.1	1.8	ST STAT3 PATHWAY	STAT3 Pathway
0.0	1.2	NABA PROTEOGLYCANS	Genes encoding proteoglycans
0.0	1.0	PID INTEGRIN5 PATHWAY	Beta5 beta6 beta7 and beta8 integrin cell surface interactions
0.0	0.8	ST MYOCYTE AD PATHWAY	Myocyte Adrenergic Pathway is a specific case of the generalized Adrenergic Pathway.
0.0	0.8	PID GLYPICAN 1PATHWAY	Glypican 1 network
Showing 1 to 10 of 12 entries
Previous
1
2
Next
Gene overrepresentation in biological_process category:
Search:
Show 102550100 entries
Log-likelihood per target	Total log-likelihood	Term	Description
0.5	4.4	GO:1990822	basic amino acid transmembrane transport(GO:1990822)
0.3	3.4	GO:1902514	regulation of calcium ion transmembrane transport via high voltage-gated calcium channel(GO:1902514)
0.6	3.2	GO:0035790	platelet-derived growth factor receptor-alpha signaling pathway(GO:0035790)
0.3	3.1	GO:0032287	peripheral nervous system myelin maintenance(GO:0032287)
0.1	2.7	GO:0030502	negative regulation of bone mineralization(GO:0030502)
0.0	2.0	GO:0048041	cell-substrate adherens junction assembly(GO:0007045) focal adhesion assembly(GO:0048041)
0.2	1.8	GO:0070120	ciliary neurotrophic factor-mediated signaling pathway(GO:0070120)
0.1	1.8	GO:0015721	bile acid and bile salt transport(GO:0015721)
0.1	1.6	GO:0007597	blood coagulation, intrinsic pathway(GO:0007597)
0.2	1.5	GO:1901376	mycotoxin metabolic process(GO:0043385) mycotoxin catabolic process(GO:0043387) aflatoxin metabolic process(GO:0046222) aflatoxin catabolic process(GO:0046223) organic heteropentacyclic compound metabolic process(GO:1901376) organic heteropentacyclic compound catabolic process(GO:1901377) regulation of glutathione biosynthetic process(GO:1903786) positive regulation of glutathione biosynthetic pr…
Showing 1 to 10 of 60 entries
Previous
1
2
3
4
5
6
Next
Gene overrepresentation in C2:CP:REACTOME category:
Search:
Show 102550100 entries
Log-likelihood per target	Total log-likelihood	Term	Description
0.1	4.3	REACTOME BASIGIN INTERACTIONS	Genes involved in Basigin interactions
0.1	3.4	REACTOME RAS ACTIVATION UOPN CA2 INFUX THROUGH NMDA RECEPTOR	Genes involved in Ras activation uopn Ca2+ infux through NMDA receptor
0.0	3.2	REACTOME DOWNSTREAM SIGNAL TRANSDUCTION	Genes involved in Downstream signal transduction
0.1	2.0	REACTOME IL 6 SIGNALING	Genes involved in Interleukin-6 signaling
0.0	2.0	REACTOME RESPONSE TO ELEVATED PLATELET CYTOSOLIC CA2	Genes involved in Response to elevated platelet cytosolic Ca2+
0.4	1.8	REACTOME RECYCLING OF BILE ACIDS AND SALTS	Genes involved in Recycling of bile acids and salts
0.0	1.7	REACTOME CLASS A1 RHODOPSIN LIKE RECEPTORS	Genes involved in Class A/1 (Rhodopsin-like receptors)
0.1	1.6	REACTOME INTRINSIC PATHWAY	Genes involved in Intrinsic Pathway
0.0	1.4	REACTOME AMINO ACID SYNTHESIS AND INTERCONVERSION TRANSAMINATION	Genes involved in Amino acid synthesis and interconversion (transamination)
0.0	1.2	REACTOME CS DS DEGRADATION	Genes involved in CS/DS degradation
Showing 1 to 10 of 22 entries
